# Supplementary material
Source: bioRxiv or medRxiv preprint supplement (https://medrxiv.org/highwire/filestream/92394/field_highwire_adjunct_files/0/2020.08.06.20168856-1.pdf)
Supplement: Supplementary file [file 2020.08.06.20168856-1.pdf]

## Supplementary Material

### Performance assessment of 11 commercial serological tests for SARS-CoV-2 on hospitalized COVID-19 patients

Serre-Miranda C<sup>1,2,#</sup>, Nobrega C<sup>1,2,#</sup>, Roque S<sup>1,2,#</sup>, Canto-Gomes J<sup>1,2</sup>, Silva CS<sup>1,2</sup>, Vieira N<sup>1,2</sup>, Barreira-Silva P<sup>1,2</sup>, Alves-Peixoto P<sup>1,2</sup>, Cotter J<sup>1,2,3</sup>, Reis A<sup>3</sup>, Formigo M<sup>3</sup>, Sarmiento H<sup>3</sup>, Pires O<sup>4</sup>, Carvalho A<sup>1,2,4</sup>, Petrovykh DY<sup>5</sup>, Diéguez L<sup>5</sup>, Sousa JC<sup>1,2</sup>, Sousa N<sup>1,2,6</sup>, Capela C<sup>1,2,4</sup>, Palha JA<sup>1,2,6</sup>, Cunha PG<sup>1,2,3</sup>, Correia-Neves M<sup>1,2,6</sup>

**Supplementary Table S1.** Assayed commercial tests to detect immunoglobulins specific for SARS-CoV-2 infection.

| Assay                                          | Supplier                     | Product                                                                           | Catalog no.    | Technology | Format   | Assay Target            | Obs                                                     |
|------------------------------------------------|------------------------------|-----------------------------------------------------------------------------------|----------------|------------|----------|-------------------------|---------------------------------------------------------|
| Semiquantitative assays                        | <b>Abbott</b><br>Diagnostics | SARS-coV-2 IgG assay                                                              | 06R86          | CLIA       | IgG      | N protein               | Requires an Abbott Architect i2000                      |
|                                                | <b>Euroimmun</b>             | anti SARS-CoV-2 <b>IgG</b> ELISA kit                                              | EI 2606-9601 G | ELISA      | IgG      | S1 protein              | Requires a regular absorbance microplate reader         |
|                                                |                              | anti SARS-CoV-2 <b>IgA</b> ELISA kit                                              | EI 2606-9601 A | ELISA      | IgA      |                         |                                                         |
|                                                | <b>Snibe</b> Diagnostic      | MAGLUMI® 2019-nCoV (SARS-CoV-2) <b>IgM</b> kit                                    | 130219016M     | CLIA       | IgM      | S antigen and N protein | Requires a MAGLUMI chemiluminescence immunoassay system |
| MAGLUMI® 2019-nCoV (SARS-CoV-2) <b>IgG</b> kit |                              | 130219015M                                                                        | CLIA           | IgG        |          |                         |                                                         |
| Qualitative assays                             | <b>Cellex</b>                | qSARS-Cov-2 IgG/IgM Cassette Rapid Test                                           | WI5513C        | LFIA       | IgM/IgG  | N and S Proteins        | -                                                       |
|                                                | <b>Getein</b> Biotech, inc   | One step test for novel coronavirus (2019-nCoV) IgM/IgG antibody (colloidal gold) | CG2057         | LFIA       | Total Ig | N and S Proteins        | -                                                       |
|                                                | <b>Innovita</b>              | 2019-nCoV Ab test (colloidal gold), IgM/IgG whole blood/Serum/Plasma Combo        | n/a            | LFIA       | IgM/IgG  | N and S Proteins        | -                                                       |
|                                                | <b>Liming</b> Bio            | StrongStep® SARS-CoV-2 IgM/IgG Test                                               | 502090         | LFIA       | IgM/IgG  | Not specified           | Extremely faint bands.                                  |
|                                                | <b>Leccurate</b>             | SARS-CoV-2 antibody test (colloidal gold immunochromatography)                    | K-20-RC-CoV-2  | LFIA       | IgM/IgG  | Not specified           | -                                                       |
|                                                | <b>Medomics</b>              | Rapid IgM-IgG Combined Antibody Test kit for SARS-CoV-2 (ICA)                     | n/a            | LFIA       | IgM/IgG  | Not specified           | -                                                       |
|                                                | <b>Render</b>                | COVID-19 IgM & IgG Test (immunochromatography)                                    | 3.2.01.0.1701  | LFIA       | IgM/IgG  | Not specified           | -                                                       |
|                                                | <b>SD</b> Biosensor          | Standard Q COVID-19 IgM/IgG Duo Test                                              | Q-NCOV-01D     | LFIA       | IgM/IgG  | N Protein               | -                                                       |

CLIA; Chemiluminescence Immunoassay; ELISA: Enzyme Linked Immuno-Sorbent Assay; LFIA: Lateral flow immunoassay; n/a: not available; N: nucleocapsid; S: spike

**Supplementary Table S2.** Summary of tests' results from patients with COVID-19, with data organized by patient ID followed by time since symptoms onset. Only depicted patients for which more than one sample was collected. The last column highlights the samples that were not considered for sensitivity calculation (as they would fall in the same time interval; please see methods section).

| Patient ID | Sample ID | Sex | Age | Days since symptoms onset | IgG    |            |       |        |          |           |        |          |        | IgA or IgM |            |       |        |          |           |        |          | Total Ig |    |            |       |        |       |        |          | Excluded from sens., PPV & NPV |           |        |          |        |
|------------|-----------|-----|-----|---------------------------|--------|------------|-------|--------|----------|-----------|--------|----------|--------|------------|------------|-------|--------|----------|-----------|--------|----------|----------|----|------------|-------|--------|-------|--------|----------|--------------------------------|-----------|--------|----------|--------|
|            |           |     |     |                           | Abbott | Euroimmune | Snibe | Cellex | Innovita | Leccurate | Liming | Medomics | Render | SD         | Euroimmune | Snibe | Cellex | Innovita | Leccurate | Liming | Medomics | Render   | SD | Euroimmune | Snibe | Cellex | Snibe | Getein | Innovita |                                | Leccurate | Liming | Medomics | Render |
| 004        | 027       | M   | 66  | 27                        |        |            |       |        |          |           |        |          |        |            |            |       |        |          |           |        |          |          |    |            |       |        |       |        |          |                                |           |        |          |        |
|            | 072       |     |     |                           |        |            |       |        |          |           |        |          |        |            |            |       |        |          |           |        |          |          |    |            |       |        |       |        |          |                                |           |        |          | yes    |
|            | 109       |     |     |                           |        |            |       |        |          |           |        |          |        |            |            |       |        |          |           |        |          |          |    |            |       |        |       |        |          |                                |           |        |          | yes    |
|            | 271       |     |     |                           |        |            |       |        |          |           |        |          |        |            |            |       |        |          |           |        |          |          |    |            |       |        |       |        |          |                                |           |        |          | yes    |
| 006        | 316       | F   | 33  | 9                         |        |            |       |        |          |           |        |          |        |            |            |       |        |          |           |        |          |          |    |            |       |        |       |        |          |                                |           |        |          |        |
|            | 341       |     |     |                           |        |            |       |        |          |           |        |          |        |            |            |       |        |          |           |        |          |          |    |            |       |        |       |        |          |                                |           |        |          |        |
|            | 449       |     |     |                           |        |            |       |        |          |           |        |          |        |            |            |       |        |          |           |        |          |          |    |            |       |        |       |        |          |                                |           |        |          |        |
| 009        | 037       | M   | 84  | 15                        |        |            |       |        |          |           |        |          |        |            |            |       |        |          |           |        |          |          |    |            |       |        |       |        |          |                                |           |        |          |        |
|            | 160       |     |     |                           |        |            |       |        |          |           |        |          |        |            |            |       |        |          |           |        |          |          |    |            |       |        |       |        |          |                                |           |        |          |        |
| 010        | 042       | F   | 84  | 10                        |        |            |       |        |          |           |        |          |        |            |            |       |        |          |           |        |          |          |    |            |       |        |       |        |          |                                |           |        |          |        |
|            | 081       |     |     |                           |        |            |       |        |          |           |        |          |        |            |            |       |        |          |           |        |          |          |    |            |       |        |       |        |          |                                |           |        |          |        |
|            | 177       |     |     |                           |        |            |       |        |          |           |        |          |        |            |            |       |        |          |           |        |          |          |    |            |       |        |       |        |          |                                |           |        |          |        |
| 013        | 022       | M   | 63  | 17                        |        |            |       |        |          |           |        |          |        |            |            |       |        |          |           |        |          |          |    |            |       |        |       |        |          |                                |           | yes    |          |        |
|            | 061       |     |     |                           |        |            |       |        |          |           |        |          |        |            |            |       |        |          |           |        |          |          |    |            |       |        |       |        |          |                                |           |        | yes      |        |
|            | 123       |     |     |                           |        |            |       |        |          |           |        |          |        |            |            |       |        |          |           |        |          |          |    |            |       |        |       |        |          |                                |           |        | yes      |        |
|            | 263       |     |     |                           |        |            |       |        |          |           |        |          |        |            |            |       |        |          |           |        |          |          |    |            |       |        |       |        |          |                                |           |        | yes      |        |
|            | 328       |     |     |                           |        |            |       |        |          |           |        |          |        |            |            |       |        |          |           |        |          |          |    |            |       |        |       |        |          |                                |           |        | yes      |        |
|            | 415       |     |     |                           |        |            |       |        |          |           |        |          |        |            |            |       |        |          |           |        |          |          |    |            |       |        |       |        |          |                                |           |        | yes      |        |
|            | 462       |     |     |                           |        |            |       |        |          |           |        |          |        |            |            |       |        |          |           |        |          |          |    |            |       |        |       |        |          |                                |           |        | yes      |        |
| 530        |           |     |     |                           |        |            |       |        |          |           |        |          |        |            |            |       |        |          |           |        |          |          |    |            |       |        |       |        |          | yes                            |           |        |          |        |
| 015        | 009       | F   | 84  | 17                        |        |            |       |        |          |           |        |          |        |            |            |       |        |          |           |        |          |          |    |            |       |        |       |        |          |                                |           |        |          |        |
|            | 069       |     |     |                           |        |            |       |        |          |           |        |          |        |            |            |       |        |          |           |        |          |          |    |            |       |        |       |        |          |                                |           |        |          |        |
|            | 331       |     |     |                           |        |            |       |        |          |           |        |          |        |            |            |       |        |          |           |        |          |          |    |            |       |        |       |        |          |                                |           |        |          |        |
| 016        | 016       | F   | 67  | 25                        |        |            |       |        |          |           |        |          |        |            |            |       |        |          |           |        |          |          |    |            |       |        |       |        |          |                                | yes       |        |          |        |
|            | 073       |     |     |                           |        |            |       |        |          |           |        |          |        |            |            |       |        |          |           |        |          |          |    |            |       |        |       |        |          |                                |           | yes    |          |        |
|            | 105       |     |     |                           |        |            |       |        |          |           |        |          |        |            |            |       |        |          |           |        |          |          |    |            |       |        |       |        |          |                                |           |        |          |        |
| 022        | 126       | F   | 49  | 9                         |        |            |       |        |          |           |        |          |        |            |            |       |        |          |           |        |          |          |    |            |       |        |       |        |          |                                |           |        |          |        |
|            | 347       |     |     |                           |        |            |       |        |          |           |        |          |        |            |            |       |        |          |           |        |          |          |    |            |       |        |       |        |          |                                |           |        |          |        |
| 023        | 099       | M   | 52  | 2                         |        |            |       |        |          |           |        |          |        |            |            |       |        |          |           |        |          |          |    |            |       |        |       |        |          |                                | yes       |        |          |        |
|            | 258       |     |     |                           |        |            |       |        |          |           |        |          |        |            |            |       |        |          |           |        |          |          |    |            |       |        |       |        |          |                                |           |        |          |        |
|            | 336       |     |     |                           |        |            |       |        |          |           |        |          |        |            |            |       |        |          |           |        |          |          |    |            |       |        |       |        |          |                                |           |        |          |        |
| 026        | 007       | M   | 74  | 9                         |        |            |       |        |          |           |        |          |        |            |            |       |        |          |           |        |          |          |    |            |       |        |       |        |          |                                | yes       |        |          |        |
|            | 092       |     |     |                           |        |            |       |        |          |           |        |          |        |            |            |       |        |          |           |        |          |          |    |            |       |        |       |        |          |                                |           |        |          |        |
|            | 317       |     |     |                           |        |            |       |        |          |           |        |          |        |            |            |       |        |          |           |        |          |          |    |            |       |        |       |        |          |                                |           |        |          |        |
| 032        | 048       | M   | 79  | 8                         |        |            |       |        |          |           |        |          |        |            |            |       |        |          |           |        |          |          |    |            |       |        |       |        |          |                                | yes       |        |          |        |
|            | 068       |     |     |                           |        |            |       |        |          |           |        |          |        |            |            |       |        |          |           |        |          |          |    |            |       |        |       |        |          |                                |           |        |          |        |
|            | 093       |     |     |                           |        |            |       |        |          |           |        |          |        |            |            |       |        |          |           |        |          |          |    |            |       |        |       |        |          |                                |           |        |          |        |
|            | 469       |     |     |                           |        |            |       |        |          |           |        |          |        |            |            |       |        |          |           |        |          |          |    |            |       |        |       |        |          |                                |           |        |          |        |
| 033        | 047       | F   | 78  | 5                         |        |            |       |        |          |           |        |          |        |            |            |       |        |          |           |        |          |          |    |            |       |        |       |        |          |                                | yes       |        |          |        |
|            | 062       |     |     |                           |        |            |       |        |          |           |        |          |        |            |            |       |        |          |           |        |          |          |    |            |       |        |       |        |          |                                |           |        |          |        |
|            | 334       |     |     |                           |        |            |       |        |          |           |        |          |        |            |            |       |        |          |           |        |          |          |    |            |       |        |       |        |          |                                |           |        |          |        |
| 034        | 010       | M   | 52  | 15                        |        |            |       |        |          |           |        |          |        |            |            |       |        |          |           |        |          |          |    |            |       |        |       |        |          |                                |           |        |          |        |
|            | 065       |     |     |                           |        |            |       |        |          |           |        |          |        |            |            |       |        |          |           |        |          |          |    |            |       |        |       |        |          |                                |           |        |          |        |
| 035        | 080       | M   | 61  | 28                        |        |            |       |        |          |           |        |          |        |            |            |       |        |          |           |        |          |          |    |            |       |        |       |        |          |                                | yes       |        |          |        |
|            | 140       |     |     |                           |        |            |       |        |          |           |        |          |        |            |            |       |        |          |           |        |          |          |    |            |       |        |       |        |          |                                |           | yes    |          |        |
|            | 353       |     |     |                           |        |            |       |        |          |           |        |          |        |            |            |       |        |          |           |        |          |          |    |            |       |        |       |        |          |                                |           | yes    |          |        |
|            | 457       |     |     |                           |        |            |       |        |          |           |        |          |        |            |            |       |        |          |           |        |          |          |    |            |       |        |       |        |          |                                |           | yes    |          |        |
| 037        | 005       | M   | 67  | 16                        |        |            |       |        |          |           |        |          |        |            |            |       |        |          |           |        |          |          |    |            |       |        |       |        |          |                                | yes       |        |          |        |
|            | 023       |     |     |                           |        |            |       |        |          |           |        |          |        |            |            |       |        |          |           |        |          |          |    |            |       |        |       |        |          |                                |           | yes    |          |        |
|            | 060       |     |     |                           |        |            |       |        |          |           |        |          |        |            |            |       |        |          |           |        |          |          |    |            |       |        |       |        |          |                                |           | yes    |          |        |
|            | 129       |     |     |                           |        |            |       |        |          |           |        |          |        |            |            |       |        |          |           |        |          |          |    |            |       |        |       |        |          |                                |           | yes    |          |        |
|            | 261       |     |     |                           |        |            |       |        |          |           |        |          |        |            |            |       |        |          |           |        |          |          |    |            |       |        |       |        |          |                                |           | yes    |          |        |
| 325        |           |     |     |                           |        |            |       |        |          |           |        |          |        |            |            |       |        |          |           |        |          |          |    |            |       |        |       |        |          |                                |           |        |          |        |

Positive  
 Negative  
 Not tested

Supplementary Table S2 (cont.)

| Patient ID | Sample ID | Sex | Age | Days since symptoms onset | IgG    |            |       |        |          |          |        |          | IgA or IgM |    |            |       |        |          |          |        | Total Ig |        |    |            |       |        |       |        | Excluded from sens., PPV & NPV |          |          |        |          |        |    |     |     |     |  |  |  |  |  |  |  |  |  |  |  |  |  |  |  |  |  |  |  |  |  |  |  |  |  |  |  |  |  |  |     |     |     |     |     |     |    |    |    |  |  |  |  |  |  |  |  |  |  |  |  |  |  |  |  |  |  |  |  |  |  |  |  |  |  |  |     |     |     |     |     |     |     |    |    |  |  |  |  |  |  |  |  |  |  |  |  |  |  |  |  |  |  |  |  |  |  |  |  |  |     |     |     |     |    |     |     |     |     |    |    |    |  |  |  |  |  |  |  |  |  |  |  |  |  |  |  |  |  |  |  |  |  |  |  |  |  |     |     |     |     |     |     |    |    |     |     |  |  |  |  |  |  |  |  |  |  |  |  |  |  |  |  |  |  |  |  |  |  |  |     |     |     |     |    |     |     |     |     |     |     |     |    |    |    |  |  |  |  |  |  |  |  |  |  |  |  |  |  |  |  |  |  |  |  |  |  |     |     |     |     |     |    |     |     |     |     |    |     |     |  |  |  |  |  |  |  |  |  |  |  |  |  |  |  |  |  |  |  |  |  |     |     |     |    |     |     |     |     |     |    |    |     |     |     |   |    |    |  |  |  |  |  |  |  |  |  |  |  |  |  |  |  |  |  |  |  |     |     |     |     |     |     |     |     |    |     |     |     |     |    |    |     |  |  |  |  |  |  |  |  |  |  |  |  |  |  |  |  |  |  |     |     |     |    |     |     |     |     |     |    |    |    |  |  |  |     |     |   |    |   |  |  |  |  |  |  |  |  |  |  |  |  |  |  |  |  |     |     |     |     |     |     |     |     |    |  |  |  |  |     |     |     |     |    |     |    |  |  |  |  |  |  |  |  |  |  |  |  |  |  |     |     |   |    |     |     |     |     |     |     |    |    |    |     |     |     |   |    |     |     |     |    |   |  |  |  |  |  |  |  |  |  |  |  |  |     |     |     |     |     |     |     |     |     |     |     |   |    |   |  |  |     |  |     |     |     |   |     |    |  |  |  |  |  |  |  |  |  |  |  |     |     |     |    |     |     |     |     |     |     |     |     |    |  |  |  |  |     |     |     |     |     |     |     |    |   |  |  |  |  |  |  |  |  |  |  |     |     |     |     |     |     |     |     |     |     |     |     |    |    |    |  |  |  |  |  |     |     |     |   |     |    |  |  |  |  |  |  |  |  |     |     |   |     |     |     |     |     |     |     |     |     |     |  |  |  |  |  |  |     |  |     |     |     |     |     |     |    |    |  |  |  |  |  |  |  |     |     |     |     |     |     |     |     |     |     |     |     |    |    |    |  |  |  |  |  |  |  |  |     |     |     |   |     |   |  |  |  |  |  |     |  |  |     |     |     |     |     |     |     |     |    |     |  |  |  |  |  |  |  |  |  |  |     |     |     |     |     |     |     |    |   |  |  |  |  |     |     |     |     |     |     |     |     |     |     |     |     |    |    |    |  |  |  |  |  |  |  |  |  |  |  |  |     |     |   |     |   |  |  |  |  |  |     |     |     |     |     |     |     |     |    |     |  |  |  |  |  |  |  |  |  |  |  |  |  |  |     |     |     |     |    |     |  |  |  |  |  |     |     |     |     |     |     |     |     |     |     |    |    |    |  |  |  |  |  |  |  |  |  |  |  |     |     |     |     |     |     |    |    |   |  |     |     |     |     |     |     |     |     |     |    |     |  |  |  |  |  |  |  |  |  |  |  |  |  |  |  |  |  |  |     |     |   |     |     |  |  |  |     |     |     |     |     |     |     |     |     |    |    |    |  |  |  |  |  |  |  |  |  |  |  |  |  |  |  |     |     |     |     |     |   |    |     |     |     |     |     |     |     |     |    |     |  |  |  |  |  |  |  |  |  |  |  |  |  |  |  |  |  |  |  |     |     |     |     |    |    |     |     |     |     |     |     |     |     |     |     |    |    |   |  |  |  |  |  |  |  |  |  |  |  |  |  |  |  |  |  |  |     |     |   |     |     |     |    |     |     |     |     |     |     |     |  |  |  |  |  |  |  |  |  |  |  |  |  |  |  |  |  |  |  |  |  |  |  |     |     |     |     |     |     |     |     |     |     |     |     |    |    |   |  |  |  |  |  |  |  |  |  |  |  |  |  |  |  |  |  |  |  |  |     |     |     |     |     |     |   |     |     |     |     |     |  |  |  |  |  |  |  |  |  |  |  |  |  |  |  |  |  |  |  |  |  |  |  |  |  |  |     |     |     |    |     |     |     |     |     |    |    |    |  |  |  |  |  |  |  |  |  |  |  |  |  |  |  |  |  |  |  |  |  |  |     |     |   |    |   |     |     |     |     |     |  |  |  |  |  |  |  |  |  |  |  |  |  |  |  |  |  |  |  |  |  |  |  |  |  |  |     |  |  |     |     |     |     |     |     |    |    |    |  |  |  |  |  |  |  |  |  |  |  |  |  |  |  |  |  |  |  |  |  |  |     |     |   |    |     |     |   |     |     |     |     |     |   |    |   |  |  |  |  |  |  |  |  |  |  |  |  |  |  |  |  |  |  |  |  |  |     |  |  |  |     |  |     |     |     |    |     |    |  |  |  |  |  |  |  |  |  |  |  |  |  |  |  |  |  |  |  |  |  |  |     |     |   |    |   |  |  |     |     |     |     |     |     |    |    |    |  |  |  |  |  |  |  |  |  |  |  |  |  |  |  |  |  |  |  |  |     |  |  |  |  |  |     |     |     |   |     |     |  |  |  |  |  |  |  |  |  |  |  |  |  |  |  |  |  |  |  |  |  |  |     |     |   |    |    |  |  |  |  |     |     |     |     |    |     |     |   |    |    |  |  |  |  |  |  |  |  |  |  |  |  |  |  |  |  |  |     |  |  |  |  |  |  |     |  |     |     |     |     |     |     |   |    |    |  |  |  |  |  |  |  |  |  |  |  |  |  |  |  |  |     |     |   |    |   |  |  |  |     |     |     |     |     |    |     |     |  |     |     |   |    |   |  |  |  |  |  |  |  |  |  |  |  |  |  |  |     |  |  |  |  |  |  |  |  |  |     |     |     |     |     |   |    |     |   |    |    |  |  |  |  |  |  |  |  |  |  |  |  |  |     |  |  |  |  |  |  |  |  |     |  |     |     |   |    |     |  |     |     |  |  |  |  |  |  |  |  |  |  |  |  |  |  |  |  |     |     |   |    |    |  |  |  |  |  |     |     |     |   |     |     |   |    |    |  |     |     |   |    |    |  |  |  |  |  |  |  |  |  |  |  |     |  |  |  |  |  |  |  |  |     |  |  |  |  |     |  |  |  |  |  |     |  |  |  |  |  |  |  |  |  |  |  |  |  |     |  |  |  |  |  |  |  |  |  |  |  |  |  |     |     |   |    |    |  |     |  |  |     |     |   |    |    |  |  |  |  |  |  |     |     |     |   |    |    |  |  |  |  |  |  |  |  |  |  |     |  |     |     |   |    |   |     |     |     |   |    |    |  |  |  |  |  |  |  |  |     |  |  |  |  |  |  |  |  |  |  |  |     |     |     |   |    |     |  |  |  |     |  |     |  |  |  |  |  |  |  |  |  |  |     |     |   |    |    |  |  |  |  |  |  |  |  |  |  |     |  |     |     |   |    |    |  |  |  |  |     |     |   |    |    |  |  |  |  |  |     |  |  |  |  |  |  |  |  |  |  |  |  |     |  |  |  |     |  |  |  |  |  |  |  |  |     |  |  |  |  |  |  |  |     |     |   |    |   |  |  |  |  |  |  |  |  |  |     |     |     |     |     |   |    |    |  |  |  |     |  |  |  |     |     |   |    |   |  |  |     |  |  |  |  |  |  |  |  |  |  |  |  |  |  |  |  |     |  |  |  |  |  |  |  |  |  |  |  |     |  |  |  |  |     |  |  |  |  |  |  |  |  |  |  |  |  |  |  |  |     |     |     |   |    |    |  |  |  |  |  |  |  |     |  |  |  |  |  |     |     |   |    |   |  |  |  |  |  |  |  |  |  |  |  |  |  |     |  |  |  |  |  |  |  |  |  |  |  |  |  |     |     |   |    |     |  |  |  |  |  |  |  |  |  |  |  |  |  |  |     |  |  |  |  |  |  |  |  |  |  |  |  |  |  |  |  |     |  |     |     |   |    |    |  |  |  |  |  |  |  |  |  |  |  |  |  |  |  |  |  |  |  |  |  |  |  |  |  |  |  |  |  |  |     |     |   |    |    |  |  |  |  |  |  |  |  |  |  |  |  |  |  |  |  |  |  |  |  |  |  |  |  |  |  |  |  |  |     |
|------------|-----------|-----|-----|---------------------------|--------|------------|-------|--------|----------|----------|--------|----------|------------|----|------------|-------|--------|----------|----------|--------|----------|--------|----|------------|-------|--------|-------|--------|--------------------------------|----------|----------|--------|----------|--------|----|-----|-----|-----|--|--|--|--|--|--|--|--|--|--|--|--|--|--|--|--|--|--|--|--|--|--|--|--|--|--|--|--|--|--|-----|-----|-----|-----|-----|-----|----|----|----|--|--|--|--|--|--|--|--|--|--|--|--|--|--|--|--|--|--|--|--|--|--|--|--|--|--|--|-----|-----|-----|-----|-----|-----|-----|----|----|--|--|--|--|--|--|--|--|--|--|--|--|--|--|--|--|--|--|--|--|--|--|--|--|--|-----|-----|-----|-----|----|-----|-----|-----|-----|----|----|----|--|--|--|--|--|--|--|--|--|--|--|--|--|--|--|--|--|--|--|--|--|--|--|--|--|-----|-----|-----|-----|-----|-----|----|----|-----|-----|--|--|--|--|--|--|--|--|--|--|--|--|--|--|--|--|--|--|--|--|--|--|--|-----|-----|-----|-----|----|-----|-----|-----|-----|-----|-----|-----|----|----|----|--|--|--|--|--|--|--|--|--|--|--|--|--|--|--|--|--|--|--|--|--|--|-----|-----|-----|-----|-----|----|-----|-----|-----|-----|----|-----|-----|--|--|--|--|--|--|--|--|--|--|--|--|--|--|--|--|--|--|--|--|--|-----|-----|-----|----|-----|-----|-----|-----|-----|----|----|-----|-----|-----|---|----|----|--|--|--|--|--|--|--|--|--|--|--|--|--|--|--|--|--|--|--|-----|-----|-----|-----|-----|-----|-----|-----|----|-----|-----|-----|-----|----|----|-----|--|--|--|--|--|--|--|--|--|--|--|--|--|--|--|--|--|--|-----|-----|-----|----|-----|-----|-----|-----|-----|----|----|----|--|--|--|-----|-----|---|----|---|--|--|--|--|--|--|--|--|--|--|--|--|--|--|--|--|-----|-----|-----|-----|-----|-----|-----|-----|----|--|--|--|--|-----|-----|-----|-----|----|-----|----|--|--|--|--|--|--|--|--|--|--|--|--|--|--|-----|-----|---|----|-----|-----|-----|-----|-----|-----|----|----|----|-----|-----|-----|---|----|-----|-----|-----|----|---|--|--|--|--|--|--|--|--|--|--|--|--|-----|-----|-----|-----|-----|-----|-----|-----|-----|-----|-----|---|----|---|--|--|-----|--|-----|-----|-----|---|-----|----|--|--|--|--|--|--|--|--|--|--|--|-----|-----|-----|----|-----|-----|-----|-----|-----|-----|-----|-----|----|--|--|--|--|-----|-----|-----|-----|-----|-----|-----|----|---|--|--|--|--|--|--|--|--|--|--|-----|-----|-----|-----|-----|-----|-----|-----|-----|-----|-----|-----|----|----|----|--|--|--|--|--|-----|-----|-----|---|-----|----|--|--|--|--|--|--|--|--|-----|-----|---|-----|-----|-----|-----|-----|-----|-----|-----|-----|-----|--|--|--|--|--|--|-----|--|-----|-----|-----|-----|-----|-----|----|----|--|--|--|--|--|--|--|-----|-----|-----|-----|-----|-----|-----|-----|-----|-----|-----|-----|----|----|----|--|--|--|--|--|--|--|--|-----|-----|-----|---|-----|---|--|--|--|--|--|-----|--|--|-----|-----|-----|-----|-----|-----|-----|-----|----|-----|--|--|--|--|--|--|--|--|--|--|-----|-----|-----|-----|-----|-----|-----|----|---|--|--|--|--|-----|-----|-----|-----|-----|-----|-----|-----|-----|-----|-----|-----|----|----|----|--|--|--|--|--|--|--|--|--|--|--|--|-----|-----|---|-----|---|--|--|--|--|--|-----|-----|-----|-----|-----|-----|-----|-----|----|-----|--|--|--|--|--|--|--|--|--|--|--|--|--|--|-----|-----|-----|-----|----|-----|--|--|--|--|--|-----|-----|-----|-----|-----|-----|-----|-----|-----|-----|----|----|----|--|--|--|--|--|--|--|--|--|--|--|-----|-----|-----|-----|-----|-----|----|----|---|--|-----|-----|-----|-----|-----|-----|-----|-----|-----|----|-----|--|--|--|--|--|--|--|--|--|--|--|--|--|--|--|--|--|--|-----|-----|---|-----|-----|--|--|--|-----|-----|-----|-----|-----|-----|-----|-----|-----|----|----|----|--|--|--|--|--|--|--|--|--|--|--|--|--|--|--|-----|-----|-----|-----|-----|---|----|-----|-----|-----|-----|-----|-----|-----|-----|----|-----|--|--|--|--|--|--|--|--|--|--|--|--|--|--|--|--|--|--|--|-----|-----|-----|-----|----|----|-----|-----|-----|-----|-----|-----|-----|-----|-----|-----|----|----|---|--|--|--|--|--|--|--|--|--|--|--|--|--|--|--|--|--|--|-----|-----|---|-----|-----|-----|----|-----|-----|-----|-----|-----|-----|-----|--|--|--|--|--|--|--|--|--|--|--|--|--|--|--|--|--|--|--|--|--|--|--|-----|-----|-----|-----|-----|-----|-----|-----|-----|-----|-----|-----|----|----|---|--|--|--|--|--|--|--|--|--|--|--|--|--|--|--|--|--|--|--|--|-----|-----|-----|-----|-----|-----|---|-----|-----|-----|-----|-----|--|--|--|--|--|--|--|--|--|--|--|--|--|--|--|--|--|--|--|--|--|--|--|--|--|--|-----|-----|-----|----|-----|-----|-----|-----|-----|----|----|----|--|--|--|--|--|--|--|--|--|--|--|--|--|--|--|--|--|--|--|--|--|--|-----|-----|---|----|---|-----|-----|-----|-----|-----|--|--|--|--|--|--|--|--|--|--|--|--|--|--|--|--|--|--|--|--|--|--|--|--|--|--|-----|--|--|-----|-----|-----|-----|-----|-----|----|----|----|--|--|--|--|--|--|--|--|--|--|--|--|--|--|--|--|--|--|--|--|--|--|-----|-----|---|----|-----|-----|---|-----|-----|-----|-----|-----|---|----|---|--|--|--|--|--|--|--|--|--|--|--|--|--|--|--|--|--|--|--|--|--|-----|--|--|--|-----|--|-----|-----|-----|----|-----|----|--|--|--|--|--|--|--|--|--|--|--|--|--|--|--|--|--|--|--|--|--|--|-----|-----|---|----|---|--|--|-----|-----|-----|-----|-----|-----|----|----|----|--|--|--|--|--|--|--|--|--|--|--|--|--|--|--|--|--|--|--|--|-----|--|--|--|--|--|-----|-----|-----|---|-----|-----|--|--|--|--|--|--|--|--|--|--|--|--|--|--|--|--|--|--|--|--|--|--|-----|-----|---|----|----|--|--|--|--|-----|-----|-----|-----|----|-----|-----|---|----|----|--|--|--|--|--|--|--|--|--|--|--|--|--|--|--|--|--|-----|--|--|--|--|--|--|-----|--|-----|-----|-----|-----|-----|-----|---|----|----|--|--|--|--|--|--|--|--|--|--|--|--|--|--|--|--|-----|-----|---|----|---|--|--|--|-----|-----|-----|-----|-----|----|-----|-----|--|-----|-----|---|----|---|--|--|--|--|--|--|--|--|--|--|--|--|--|--|-----|--|--|--|--|--|--|--|--|--|-----|-----|-----|-----|-----|---|----|-----|---|----|----|--|--|--|--|--|--|--|--|--|--|--|--|--|-----|--|--|--|--|--|--|--|--|-----|--|-----|-----|---|----|-----|--|-----|-----|--|--|--|--|--|--|--|--|--|--|--|--|--|--|--|--|-----|-----|---|----|----|--|--|--|--|--|-----|-----|-----|---|-----|-----|---|----|----|--|-----|-----|---|----|----|--|--|--|--|--|--|--|--|--|--|--|-----|--|--|--|--|--|--|--|--|-----|--|--|--|--|-----|--|--|--|--|--|-----|--|--|--|--|--|--|--|--|--|--|--|--|--|-----|--|--|--|--|--|--|--|--|--|--|--|--|--|-----|-----|---|----|----|--|-----|--|--|-----|-----|---|----|----|--|--|--|--|--|--|-----|-----|-----|---|----|----|--|--|--|--|--|--|--|--|--|--|-----|--|-----|-----|---|----|---|-----|-----|-----|---|----|----|--|--|--|--|--|--|--|--|-----|--|--|--|--|--|--|--|--|--|--|--|-----|-----|-----|---|----|-----|--|--|--|-----|--|-----|--|--|--|--|--|--|--|--|--|--|-----|-----|---|----|----|--|--|--|--|--|--|--|--|--|--|-----|--|-----|-----|---|----|----|--|--|--|--|-----|-----|---|----|----|--|--|--|--|--|-----|--|--|--|--|--|--|--|--|--|--|--|--|-----|--|--|--|-----|--|--|--|--|--|--|--|--|-----|--|--|--|--|--|--|--|-----|-----|---|----|---|--|--|--|--|--|--|--|--|--|-----|-----|-----|-----|-----|---|----|----|--|--|--|-----|--|--|--|-----|-----|---|----|---|--|--|-----|--|--|--|--|--|--|--|--|--|--|--|--|--|--|--|--|-----|--|--|--|--|--|--|--|--|--|--|--|-----|--|--|--|--|-----|--|--|--|--|--|--|--|--|--|--|--|--|--|--|--|-----|-----|-----|---|----|----|--|--|--|--|--|--|--|-----|--|--|--|--|--|-----|-----|---|----|---|--|--|--|--|--|--|--|--|--|--|--|--|--|-----|--|--|--|--|--|--|--|--|--|--|--|--|--|-----|-----|---|----|-----|--|--|--|--|--|--|--|--|--|--|--|--|--|--|-----|--|--|--|--|--|--|--|--|--|--|--|--|--|--|--|--|-----|--|-----|-----|---|----|----|--|--|--|--|--|--|--|--|--|--|--|--|--|--|--|--|--|--|--|--|--|--|--|--|--|--|--|--|--|--|-----|-----|---|----|----|--|--|--|--|--|--|--|--|--|--|--|--|--|--|--|--|--|--|--|--|--|--|--|--|--|--|--|--|--|-----|
|            |           |     |     |                           | Abbott | Euroimmune | Snibe | Cellex | Innovita | Lecurate | Liming | Medomics | Render     | SD | Euroimmune | Snibe | Cellex | Innovita | Lecurate | Liming | Medomics | Render | SD | Euroimmune | Snibe | Cellex | Snibe | Getein |                                | Innovita | Lecurate | Liming | Medomics | Render | SD |     |     |     |  |  |  |  |  |  |  |  |  |  |  |  |  |  |  |  |  |  |  |  |  |  |  |  |  |  |  |  |  |  |     |     |     |     |     |     |    |    |    |  |  |  |  |  |  |  |  |  |  |  |  |  |  |  |  |  |  |  |  |  |  |  |  |  |  |  |     |     |     |     |     |     |     |    |    |  |  |  |  |  |  |  |  |  |  |  |  |  |  |  |  |  |  |  |  |  |  |  |  |  |     |     |     |     |    |     |     |     |     |    |    |    |  |  |  |  |  |  |  |  |  |  |  |  |  |  |  |  |  |  |  |  |  |  |  |  |  |     |     |     |     |     |     |    |    |     |     |  |  |  |  |  |  |  |  |  |  |  |  |  |  |  |  |  |  |  |  |  |  |  |     |     |     |     |    |     |     |     |     |     |     |     |    |    |    |  |  |  |  |  |  |  |  |  |  |  |  |  |  |  |  |  |  |  |  |  |  |     |     |     |     |     |    |     |     |     |     |    |     |     |  |  |  |  |  |  |  |  |  |  |  |  |  |  |  |  |  |  |  |  |  |     |     |     |    |     |     |     |     |     |    |    |     |     |     |   |    |    |  |  |  |  |  |  |  |  |  |  |  |  |  |  |  |  |  |  |  |     |     |     |     |     |     |     |     |    |     |     |     |     |    |    |     |  |  |  |  |  |  |  |  |  |  |  |  |  |  |  |  |  |  |     |     |     |    |     |     |     |     |     |    |    |    |  |  |  |     |     |   |    |   |  |  |  |  |  |  |  |  |  |  |  |  |  |  |  |  |     |     |     |     |     |     |     |     |    |  |  |  |  |     |     |     |     |    |     |    |  |  |  |  |  |  |  |  |  |  |  |  |  |  |     |     |   |    |     |     |     |     |     |     |    |    |    |     |     |     |   |    |     |     |     |    |   |  |  |  |  |  |  |  |  |  |  |  |  |     |     |     |     |     |     |     |     |     |     |     |   |    |   |  |  |     |  |     |     |     |   |     |    |  |  |  |  |  |  |  |  |  |  |  |     |     |     |    |     |     |     |     |     |     |     |     |    |  |  |  |  |     |     |     |     |     |     |     |    |   |  |  |  |  |  |  |  |  |  |  |     |     |     |     |     |     |     |     |     |     |     |     |    |    |    |  |  |  |  |  |     |     |     |   |     |    |  |  |  |  |  |  |  |  |     |     |   |     |     |     |     |     |     |     |     |     |     |  |  |  |  |  |  |     |  |     |     |     |     |     |     |    |    |  |  |  |  |  |  |  |     |     |     |     |     |     |     |     |     |     |     |     |    |    |    |  |  |  |  |  |  |  |  |     |     |     |   |     |   |  |  |  |  |  |     |  |  |     |     |     |     |     |     |     |     |    |     |  |  |  |  |  |  |  |  |  |  |     |     |     |     |     |     |     |    |   |  |  |  |  |     |     |     |     |     |     |     |     |     |     |     |     |    |    |    |  |  |  |  |  |  |  |  |  |  |  |  |     |     |   |     |   |  |  |  |  |  |     |     |     |     |     |     |     |     |    |     |  |  |  |  |  |  |  |  |  |  |  |  |  |  |     |     |     |     |    |     |  |  |  |  |  |     |     |     |     |     |     |     |     |     |     |    |    |    |  |  |  |  |  |  |  |  |  |  |  |     |     |     |     |     |     |    |    |   |  |     |     |     |     |     |     |     |     |     |    |     |  |  |  |  |  |  |  |  |  |  |  |  |  |  |  |  |  |  |     |     |   |     |     |  |  |  |     |     |     |     |     |     |     |     |     |    |    |    |  |  |  |  |  |  |  |  |  |  |  |  |  |  |  |     |     |     |     |     |   |    |     |     |     |     |     |     |     |     |    |     |  |  |  |  |  |  |  |  |  |  |  |  |  |  |  |  |  |  |  |     |     |     |     |    |    |     |     |     |     |     |     |     |     |     |     |    |    |   |  |  |  |  |  |  |  |  |  |  |  |  |  |  |  |  |  |  |     |     |   |     |     |     |    |     |     |     |     |     |     |     |  |  |  |  |  |  |  |  |  |  |  |  |  |  |  |  |  |  |  |  |  |  |  |     |     |     |     |     |     |     |     |     |     |     |     |    |    |   |  |  |  |  |  |  |  |  |  |  |  |  |  |  |  |  |  |  |  |  |     |     |     |     |     |     |   |     |     |     |     |     |  |  |  |  |  |  |  |  |  |  |  |  |  |  |  |  |  |  |  |  |  |  |  |  |  |  |     |     |     |    |     |     |     |     |     |    |    |    |  |  |  |  |  |  |  |  |  |  |  |  |  |  |  |  |  |  |  |  |  |  |     |     |   |    |   |     |     |     |     |     |  |  |  |  |  |  |  |  |  |  |  |  |  |  |  |  |  |  |  |  |  |  |  |  |  |  |     |  |  |     |     |     |     |     |     |    |    |    |  |  |  |  |  |  |  |  |  |  |  |  |  |  |  |  |  |  |  |  |  |  |     |     |   |    |     |     |   |     |     |     |     |     |   |    |   |  |  |  |  |  |  |  |  |  |  |  |  |  |  |  |  |  |  |  |  |  |     |  |  |  |     |  |     |     |     |    |     |    |  |  |  |  |  |  |  |  |  |  |  |  |  |  |  |  |  |  |  |  |  |  |     |     |   |    |   |  |  |     |     |     |     |     |     |    |    |    |  |  |  |  |  |  |  |  |  |  |  |  |  |  |  |  |  |  |  |  |     |  |  |  |  |  |     |     |     |   |     |     |  |  |  |  |  |  |  |  |  |  |  |  |  |  |  |  |  |  |  |  |  |  |     |     |   |    |    |  |  |  |  |     |     |     |     |    |     |     |   |    |    |  |  |  |  |  |  |  |  |  |  |  |  |  |  |  |  |  |     |  |  |  |  |  |  |     |  |     |     |     |     |     |     |   |    |    |  |  |  |  |  |  |  |  |  |  |  |  |  |  |  |  |     |     |   |    |   |  |  |  |     |     |     |     |     |    |     |     |  |     |     |   |    |   |  |  |  |  |  |  |  |  |  |  |  |  |  |  |     |  |  |  |  |  |  |  |  |  |     |     |     |     |     |   |    |     |   |    |    |  |  |  |  |  |  |  |  |  |  |  |  |  |     |  |  |  |  |  |  |  |  |     |  |     |     |   |    |     |  |     |     |  |  |  |  |  |  |  |  |  |  |  |  |  |  |  |  |     |     |   |    |    |  |  |  |  |  |     |     |     |   |     |     |   |    |    |  |     |     |   |    |    |  |  |  |  |  |  |  |  |  |  |  |     |  |  |  |  |  |  |  |  |     |  |  |  |  |     |  |  |  |  |  |     |  |  |  |  |  |  |  |  |  |  |  |  |  |     |  |  |  |  |  |  |  |  |  |  |  |  |  |     |     |   |    |    |  |     |  |  |     |     |   |    |    |  |  |  |  |  |  |     |     |     |   |    |    |  |  |  |  |  |  |  |  |  |  |     |  |     |     |   |    |   |     |     |     |   |    |    |  |  |  |  |  |  |  |  |     |  |  |  |  |  |  |  |  |  |  |  |     |     |     |   |    |     |  |  |  |     |  |     |  |  |  |  |  |  |  |  |  |  |     |     |   |    |    |  |  |  |  |  |  |  |  |  |  |     |  |     |     |   |    |    |  |  |  |  |     |     |   |    |    |  |  |  |  |  |     |  |  |  |  |  |  |  |  |  |  |  |  |     |  |  |  |     |  |  |  |  |  |  |  |  |     |  |  |  |  |  |  |  |     |     |   |    |   |  |  |  |  |  |  |  |  |  |     |     |     |     |     |   |    |    |  |  |  |     |  |  |  |     |     |   |    |   |  |  |     |  |  |  |  |  |  |  |  |  |  |  |  |  |  |  |  |     |  |  |  |  |  |  |  |  |  |  |  |     |  |  |  |  |     |  |  |  |  |  |  |  |  |  |  |  |  |  |  |  |     |     |     |   |    |    |  |  |  |  |  |  |  |     |  |  |  |  |  |     |     |   |    |   |  |  |  |  |  |  |  |  |  |  |  |  |  |     |  |  |  |  |  |  |  |  |  |  |  |  |  |     |     |   |    |     |  |  |  |  |  |  |  |  |  |  |  |  |  |  |     |  |  |  |  |  |  |  |  |  |  |  |  |  |  |  |  |     |  |     |     |   |    |    |  |  |  |  |  |  |  |  |  |  |  |  |  |  |  |  |  |  |  |  |  |  |  |  |  |  |  |  |  |  |     |     |   |    |    |  |  |  |  |  |  |  |  |  |  |  |  |  |  |  |  |  |  |  |  |  |  |  |  |  |  |  |  |  |     |
| 038        | 002       | M   | 78  | 15                        |        |            |       |        |          |          |        |          |            |    |            |       |        |          |          |        |          |        |    |            |       |        |       |        |                                |          |          |        |          |        |    |     | 015 |     |  |  |  |  |  |  |  |  |  |  |  |  |  |  |  |  |  |  |  |  |  |  |  |  |  |  |  |  |  |  |     |     | 043 |     |     |     |    |    |    |  |  |  |  |  |  |  |  |  |  |  |  |  |  |  |  |  |  |  |  |  |  |  |  |  |  |  | yes | 040 | 185 | M   | 90  | 9   |     |    |    |  |  |  |  |  |  |  |  |  |  |  |  |  |  |  |  |  |  |  |  |  |  |  |  |  |     |     |     | 320 |    |     |     |     |     |    |    |    |  |  |  |  |  |  |  |  |  |  |  |  |  |  |  |  |  |  |  |  |  |  |  |  |  | 043 | 040 | M   | 63  | 9   |     |    |    |     |     |  |  |  |  |  |  |  |  |  |  |  |  |  |  |  |  |  |  |  |  |  |  |  |     |     |     | 103 |    |     |     |     |     |     |     |     |    |    |    |  |  |  |  |  |  |  |  |  |  |  |  |  |  |  |  |  |  |  |  |  |  | 045 | 079 | F   | 91  | 7   |    |     |     |     |     |    |     |     |  |  |  |  |  |  |  |  |  |  |  |  |  |  |  |  |  |  |  |  |  |     |     | 147 |    |     |     |     |     |     |    |    |     |     |     |   |    |    |  |  |  |  |  |  |  |  |  |  |  |  |  |  |  |  |  |  |  | 179 |     |     |     |     |     |     |     |    |     |     |     |     |    |    |     |  |  |  |  |  |  |  |  |  |  |  |  |  |  |  |  |  |  | yes | 047 | 019 | M  | 74  | 19  |     |     |     |    |    |    |  |  |  |     |     |   |    |   |  |  |  |  |  |  |  |  |  |  |  |  |  |  |  |  |     | 067 |     |     |     |     |     |     |    |  |  |  |  |     |     |     |     |    |     |    |  |  |  |  |  |  |  |  |  |  |  |  |  |  |     | 339 |   |    |     |     |     |     |     |     |    |    |    |     |     |     |   |    |     |     |     |    |   |  |  |  |  |  |  |  |  |  |  |  |  | yes | 049 | 031 | M   | 82  | 10  |     |     |     |     |     |   |    |   |  |  |     |  |     |     |     |   |     |    |  |  |  |  |  |  |  |  |  |  |  |     |     | 106 |    |     |     |     |     |     |     |     |     |    |  |  |  |  |     |     |     |     |     |     |     |    |   |  |  |  |  |  |  |  |  |  |  | yes | 051 | 306 | F   | 60  | 8   |     |     |     |     |     |     |    |    |    |  |  |  |  |  |     |     |     |   |     |    |  |  |  |  |  |  |  |  |     |     |   | 354 |     |     |     |     |     |     |     |     |     |  |  |  |  |  |  |     |  |     |     |     |     |     |     |    |    |  |  |  |  |  |  |  |     | 052 | 041 | F   | 80  | 18  |     |     |     |     |     |     |    |    |    |  |  |  |  |  |  |  |  |     |     |     |   |     |   |  |  |  |  |  |     |  |  | 075 |     |     |     |     |     |     |     |    |     |  |  |  |  |  |  |  |  |  |  |     |     |     |     |     |     |     |    |   |  |  |  |  | yes | 056 | 030 | F   | 79  | 10  |     |     |     |     |     |     |    |    |    |  |  |  |  |  |  |  |  |  |  |  |  |     |     |   |     |   |  |  |  |  |  | 076 |     |     |     |     |     |     |     |    |     |  |  |  |  |  |  |  |  |  |  |  |  |  |  |     |     |     |     |    |     |  |  |  |  |  | 297 |     |     |     |     |     |     |     |     |     |    |    |    |  |  |  |  |  |  |  |  |  |  |  |     |     |     |     |     |     |    |    |   |  | yes | 060 | 257 | F   | 53  | 14  |     |     |     |    |     |  |  |  |  |  |  |  |  |  |  |  |  |  |  |  |  |  |  |     |     |   |     |     |  |  |  | 323 |     |     |     |     |     |     |     |     |    |    |    |  |  |  |  |  |  |  |  |  |  |  |  |  |  |  |     |     |     |     |     |   |    | 061 | 104 | F   | 79  | 13  |     |     |     |    |     |  |  |  |  |  |  |  |  |  |  |  |  |  |  |  |  |  |  |  |     |     |     |     |    |    |     | 312 |     |     |     |     |     |     |     |     |    |    |   |  |  |  |  |  |  |  |  |  |  |  |  |  |  |  |  |  |  |     |     |   |     | 064 | 044 | F  | 75  | 23  |     |     |     |     |     |  |  |  |  |  |  |  |  |  |  |  |  |  |  |  |  |  |  |  |  |  |  |  |     |     |     | 102 |     |     |     |     |     |     |     |     |    |    |   |  |  |  |  |  |  |  |  |  |  |  |  |  |  |  |  |  |  |  |  |     | yes | 065 | 259 | F   | 43  | 9 |     |     |     |     |     |  |  |  |  |  |  |  |  |  |  |  |  |  |  |  |  |  |  |  |  |  |  |  |  |  |  | 322 |     |     |    |     |     |     |     |     |    |    |    |  |  |  |  |  |  |  |  |  |  |  |  |  |  |  |  |  |  |  |  |  |  | 070 | 063 | F | 48 | 4 |     |     |     |     |     |  |  |  |  |  |  |  |  |  |  |  |  |  |  |  |  |  |  |  |  |  |  |  |  |  |  | 286 |  |  |     |     |     |     |     |     |    |    |    |  |  |  |  |  |  |  |  |  |  |  |  |  |  |  |  |  |  |  |  |  |  | 072 | 025 | F | 80 | 7   |     |   |     |     |     |     |     |   |    |   |  |  |  |  |  |  |  |  |  |  |  |  |  |  |  |  |  |  |  |  |  | 342 |  |  |  |     |  |     |     |     |    |     |    |  |  |  |  |  |  |  |  |  |  |  |  |  |  |  |  |  |  |  |  |  |  | 076 | 038 | F | 52 | 7 |  |  |     |     |     |     |     |     |    |    |    |  |  |  |  |  |  |  |  |  |  |  |  |  |  |  |  |  |  |  |  | 098 |  |  |  |  |  |     |     |     |   |     |     |  |  |  |  |  |  |  |  |  |  |  |  |  |  |  |  |  |  |  |  |  |  | 078 | 262 | F | 85 | 14 |  |  |  |  |     |     |     |     |    |     |     |   |    |    |  |  |  |  |  |  |  |  |  |  |  |  |  |  |  |  |  | 291 |  |  |  |  |  |  |     |  |     |     |     |     |     |     |   |    |    |  |  |  |  |  |  |  |  |  |  |  |  |  |  |  |  | 079 | 314 | F | 88 | 8 |  |  |  |     |     |     |     |     |    |     |     |  |     |     |   |    |   |  |  |  |  |  |  |  |  |  |  |  |  |  |  | 335 |  |  |  |  |  |  |  |  |  |     |     |     |     |     |   |    |     |   |    |    |  |  |  |  |  |  |  |  |  |  |  |  |  | 468 |  |  |  |  |  |  |  |  |     |  |     |     |   |    |     |  |     |     |  |  |  |  |  |  |  |  |  |  |  |  |  |  |  |  | 080 | 054 | F | 71 | 10 |  |  |  |  |  |     |     |     |   |     |     |   |    |    |  |     |     |   |    |    |  |  |  |  |  |  |  |  |  |  |  | 089 |  |  |  |  |  |  |  |  |     |  |  |  |  |     |  |  |  |  |  |     |  |  |  |  |  |  |  |  |  |  |  |  |  | 131 |  |  |  |  |  |  |  |  |  |  |  |  |  |     |     |   |    |    |  |     |  |  |     |     |   |    |    |  |  |  |  |  |  | yes | 083 | 020 | M | 67 | 18 |  |  |  |  |  |  |  |  |  |  |     |  |     |     |   |    |   |     |     |     |   |    |    |  |  |  |  |  |  |  |  | 088 |  |  |  |  |  |  |  |  |  |  |  |     |     |     |   |    |     |  |  |  |     |  |     |  |  |  |  |  |  |  |  |  |  | 084 | 012 | M | 45 | 23 |  |  |  |  |  |  |  |  |  |  |     |  |     |     |   |    |    |  |  |  |  |     |     |   |    |    |  |  |  |  |  | 021 |  |  |  |  |  |  |  |  |  |  |  |  |     |  |  |  |     |  |  |  |  |  |  |  |  |     |  |  |  |  |  |  |  | 142 | 399 | M | 73 | 7 |  |  |  |  |  |  |  |  |  |     |     |     |     |     |   |    |    |  |  |  |     |  |  |  |     |     |   |    |   |  |  | 427 |  |  |  |  |  |  |  |  |  |  |  |  |  |  |  |  |     |  |  |  |  |  |  |  |  |  |  |  |     |  |  |  |  | 505 |  |  |  |  |  |  |  |  |  |  |  |  |  |  |  |     |     |     |   |    |    |  |  |  |  |  |  |  |     |  |  |  |  |  | 153 | 444 | F | 85 | 9 |  |  |  |  |  |  |  |  |  |  |  |  |  |     |  |  |  |  |  |  |  |  |  |  |  |  |  |     |     |   |    | 511 |  |  |  |  |  |  |  |  |  |  |  |  |  |  |     |  |  |  |  |  |  |  |  |  |  |  |  |  |  |  |  |     |  | 163 | 361 | F | 47 | 23 |  |  |  |  |  |  |  |  |  |  |  |  |  |  |  |  |  |  |  |  |  |  |  |  |  |  |  |  |  |  |     | 424 |   |    |    |  |  |  |  |  |  |  |  |  |  |  |  |  |  |  |  |  |  |  |  |  |  |  |  |  |  |  |  |  | yes |
|            | 015       |     |     |                           |        |            |       |        |          |          |        |          |            |    |            |       |        |          |          |        |          |        |    |            |       |        |       |        |                                |          |          |        |          |        |    |     | 043 |     |  |  |  |  |  |  |  |  |  |  |  |  |  |  |  |  |  |  |  |  |  |  |  |  |  |  |  |  |  |  |     |     | yes | 040 | 185 | M   | 90 | 9  |    |  |  |  |  |  |  |  |  |  |  |  |  |  |  |  |  |  |  |  |  |  |  |  |  |  |  |  |     |     |     |     |     |     | 320 |    |    |  |  |  |  |  |  |  |  |  |  |  |  |  |  |  |  |  |  |  |  |  |  |  |  |  |     |     |     |     |    |     | 043 | 040 | M   | 63 | 9  |    |  |  |  |  |  |  |  |  |  |  |  |  |  |  |  |  |  |  |  |  |  |  |  |  |  |     |     |     |     |     |     |    |    | 103 |     |  |  |  |  |  |  |  |  |  |  |  |  |  |  |  |  |  |  |  |  |  |  |  |     |     |     |     |    |     |     |     |     | 045 | 079 | F   | 91 | 7  |    |  |  |  |  |  |  |  |  |  |  |  |  |  |  |  |  |  |  |  |  |  |  |     |     |     |     |     |    |     |     |     |     |    | 147 |     |  |  |  |  |  |  |  |  |  |  |  |  |  |  |  |  |  |  |  |  |  |     |     |     |    |     |     |     |     |     |    |    | 179 |     |     |   |    |    |  |  |  |  |  |  |  |  |  |  |  |  |  |  |  |  |  |  |  |     |     |     |     |     |     |     |     |    | yes | 047 | 019 | M   | 74 | 19 |     |  |  |  |  |  |  |  |  |  |  |  |  |  |  |  |  |  |  |     |     |     |    |     |     |     |     |     |    |    |    |  |  |  | 067 |     |   |    |   |  |  |  |  |  |  |  |  |  |  |  |  |  |  |  |  |     |     |     |     |     |     |     |     |    |  |  |  |  | 339 |     |     |     |    |     |    |  |  |  |  |  |  |  |  |  |  |  |  |  |  |     |     |   |    |     |     |     |     |     |     |    |    |    | yes | 049 | 031 | M | 82 | 10  |     |     |    |   |  |  |  |  |  |  |  |  |  |  |  |  |     |     |     |     |     |     |     |     |     |     |     |   |    |   |  |  |     |  | 106 |     |     |   |     |    |  |  |  |  |  |  |  |  |  |  |  |     |     |     |    |     |     |     |     |     |     |     |     |    |  |  |  |  | yes | 051 | 306 | F   | 60  | 8   |     |    |   |  |  |  |  |  |  |  |  |  |  |     |     |     |     |     |     |     |     |     |     |     |     |    |    |    |  |  |  |  |  |     | 354 |     |   |     |    |  |  |  |  |  |  |  |  |     |     |   |     |     |     |     |     |     |     |     |     |     |  |  |  |  |  |  |     |  | 052 | 041 | F   | 80  | 18  |     |    |    |  |  |  |  |  |  |  |     |     |     |     |     |     |     |     |     |     |     |     |    |    |    |  |  |  |  |  |  |  |  |     | 075 |     |   |     |   |  |  |  |  |  |     |  |  |     |     |     |     |     |     |     |     |    |     |  |  |  |  |  |  |  |  |  |  | yes | 056 | 030 | F   | 79  | 10  |     |    |   |  |  |  |  |     |     |     |     |     |     |     |     |     |     |     |     |    |    |    |  |  |  |  |  |  |  |  |  |  |  |  | 076 |     |   |     |   |  |  |  |  |  |     |     |     |     |     |     |     |     |    |     |  |  |  |  |  |  |  |  |  |  |  |  |  |  |     | 297 |     |     |    |     |  |  |  |  |  |     |     |     |     |     |     |     |     |     |     |    |    |    |  |  |  |  |  |  |  |  |  |  |  | yes | 060 | 257 | F   | 53  | 14  |    |    |   |  |     |     |     |     |     |     |     |     |     |    |     |  |  |  |  |  |  |  |  |  |  |  |  |  |  |  |  |  |  |     | 323 |   |     |     |  |  |  |     |     |     |     |     |     |     |     |     |    |    |    |  |  |  |  |  |  |  |  |  |  |  |  |  |  |  | 061 | 104 | F   | 79  | 13  |   |    |     |     |     |     |     |     |     |     |    |     |  |  |  |  |  |  |  |  |  |  |  |  |  |  |  |  |  |  |  |     |     |     | 312 |    |    |     |     |     |     |     |     |     |     |     |     |    |    |   |  |  |  |  |  |  |  |  |  |  |  |  |  |  |  |  |  |  | 064 | 044 | F | 75  |     | 23  |    |     |     |     |     |     |     |     |  |  |  |  |  |  |  |  |  |  |  |  |  |  |  |  |  |  |  |  |  |  |  |     |     | 102 |     |     |     |     |     |     |     |     |     |    |    |   |  |  |  |  |  |  |  |  |  |  |  |  |  |  |  |  |  |  |  |  | yes | 065 |     | 259 |     |     | F | 43  | 9   |     |     |     |  |  |  |  |  |  |  |  |  |  |  |  |  |  |  |  |  |  |  |  |  |  |  |  |  |  |     |     | 322 |    |     |     |     |     |     |    |    |    |  |  |  |  |  |  |  |  |  |  |  |  |  |  |  |  |  |  |  |  |  |  |     |     |   |    |   | 070 | 063 | F   | 48  | 4   |  |  |  |  |  |  |  |  |  |  |  |  |  |  |  |  |  |  |  |  |  |  |  |  |  |  |     |  |  |     |     | 286 |     |     |     |    |    |    |  |  |  |  |  |  |  |  |  |  |  |  |  |  |  |  |  |  |  |  |  |  |     |     |   |    |     |     |   |     | 072 | 025 | F   | 80  | 7 |    |   |  |  |  |  |  |  |  |  |  |  |  |  |  |  |  |  |  |  |  |  |  |     |  |  |  |     |  |     |     | 342 |    |     |    |  |  |  |  |  |  |  |  |  |  |  |  |  |  |  |  |  |  |  |  |  |  |     |     |   |    |   |  |  |     |     |     |     | 076 | 038 | F  | 52 | 7  |  |  |  |  |  |  |  |  |  |  |  |  |  |  |  |  |  |  |  |  |     |  |  |  |  |  |     |     |     |   |     | 098 |  |  |  |  |  |  |  |  |  |  |  |  |  |  |  |  |  |  |  |  |  |  |     |     |   |    |    |  |  |  |  |     |     |     |     |    | 078 | 262 | F | 85 | 14 |  |  |  |  |  |  |  |  |  |  |  |  |  |  |  |  |  |     |  |  |  |  |  |  |     |  |     |     |     |     |     | 291 |   |    |    |  |  |  |  |  |  |  |  |  |  |  |  |  |  |  |  |     |     |   |    |   |  |  |  |     |     |     |     |     |    |     |     |  | 079 | 314 | F | 88 | 8 |  |  |  |  |  |  |  |  |  |  |  |  |  |  |     |  |  |  |  |  |  |  |  |  |     |     |     |     |     |   |    | 335 |   |    |    |  |  |  |  |  |  |  |  |  |  |  |  |  |     |  |  |  |  |  |  |  |  |     |  |     |     |   |    |     |  | 468 |     |  |  |  |  |  |  |  |  |  |  |  |  |  |  |  |  |     |     |   |    |    |  |  |  |  |  |     |     |     |   |     |     |   |    |    |  | 080 | 054 | F | 71 | 10 |  |  |  |  |  |  |  |  |  |  |  |     |  |  |  |  |  |  |  |  |     |  |  |  |  |     |  |  |  |  |  | 089 |  |  |  |  |  |  |  |  |  |  |  |  |  |     |  |  |  |  |  |  |  |  |  |  |  |  |  |     |     |   |    |    |  | 131 |  |  |     |     |   |    |    |  |  |  |  |  |  |     |     |     |   |    |    |  |  |  |  |  |  |  |  |  |  |     |  |     |     |   |    |   | yes | 083 | 020 | M | 67 | 18 |  |  |  |  |  |  |  |  |     |  |  |  |  |  |  |  |  |  |  |  |     |     |     |   |    |     |  |  |  |     |  | 088 |  |  |  |  |  |  |  |  |  |  |     |     |   |    |    |  |  |  |  |  |  |  |  |  |  |     |  |     |     |   |    |    |  |  |  |  | 084 | 012 | M | 45 | 23 |  |  |  |  |  |     |  |  |  |  |  |  |  |  |  |  |  |  |     |  |  |  |     |  |  |  |  |  |  |  |  | 021 |  |  |  |  |  |  |  |     |     |   |    |   |  |  |  |  |  |  |  |  |  |     |     |     |     |     |   |    |    |  |  |  |     |  |  |  | 142 | 399 | M | 73 | 7 |  |  |     |  |  |  |  |  |  |  |  |  |  |  |  |  |  |  |  |     |  |  |  |  |  |  |  |  |  |  |  | 427 |  |  |  |  |     |  |  |  |  |  |  |  |  |  |  |  |  |  |  |  |     |     |     |   |    |    |  |  |  |  |  |  |  | 505 |  |  |  |  |  |     |     |   |    |   |  |  |  |  |  |  |  |  |  |  |  |  |  |     |  |  |  |  |  |  |  |  |  |  |  |  |  | 153 | 444 | F | 85 | 9   |  |  |  |  |  |  |  |  |  |  |  |  |  |  |     |  |  |  |  |  |  |  |  |  |  |  |  |  |  |  |  | 511 |  |     |     |   |    |    |  |  |  |  |  |  |  |  |  |  |  |  |  |  |  |  |  |  |  |  |  |  |  |  |  |  |  |  |  |  | 163 | 361 | F | 47 | 23 |  |  |  |  |  |  |  |  |  |  |  |  |  |  |  |  |  |  |  |  |  |  |  |  |  |  |  |  |  |     |
|            | 043       |     |     |                           |        |            |       |        |          |          |        |          |            |    |            |       |        |          |          |        |          |        |    |            |       |        |       |        |                                |          |          |        |          |        |    |     | yes |     |  |  |  |  |  |  |  |  |  |  |  |  |  |  |  |  |  |  |  |  |  |  |  |  |  |  |  |  |  |  |     |     |     |     |     |     |    |    |    |  |  |  |  |  |  |  |  |  |  |  |  |  |  |  |  |  |  |  |  |  |  |  |  |  |  |  |     |     |     |     |     |     |     |    |    |  |  |  |  |  |  |  |  |  |  |  |  |  |  |  |  |  |  |  |  |  |  |  |  |  |     |     |     |     |    |     |     |     |     |    |    |    |  |  |  |  |  |  |  |  |  |  |  |  |  |  |  |  |  |  |  |  |  |  |  |  |  |     |     |     |     |     |     |    |    |     |     |  |  |  |  |  |  |  |  |  |  |  |  |  |  |  |  |  |  |  |  |  |  |  |     |     |     |     |    |     |     |     |     |     |     |     |    |    |    |  |  |  |  |  |  |  |  |  |  |  |  |  |  |  |  |  |  |  |  |  |  |     |     |     |     |     |    |     |     |     |     |    |     |     |  |  |  |  |  |  |  |  |  |  |  |  |  |  |  |  |  |  |  |  |  |     |     |     |    |     |     |     |     |     |    |    |     |     |     |   |    |    |  |  |  |  |  |  |  |  |  |  |  |  |  |  |  |  |  |  |  |     |     |     |     |     |     |     |     |    |     |     |     |     |    |    |     |  |  |  |  |  |  |  |  |  |  |  |  |  |  |  |  |  |  |     |     |     |    |     |     |     |     |     |    |    |    |  |  |  |     |     |   |    |   |  |  |  |  |  |  |  |  |  |  |  |  |  |  |  |  |     |     |     |     |     |     |     |     |    |  |  |  |  |     |     |     |     |    |     |    |  |  |  |  |  |  |  |  |  |  |  |  |  |  |     |     |   |    |     |     |     |     |     |     |    |    |    |     |     |     |   |    |     |     |     |    |   |  |  |  |  |  |  |  |  |  |  |  |  |     |     |     |     |     |     |     |     |     |     |     |   |    |   |  |  |     |  |     |     |     |   |     |    |  |  |  |  |  |  |  |  |  |  |  |     |     |     |    |     |     |     |     |     |     |     |     |    |  |  |  |  |     |     |     |     |     |     |     |    |   |  |  |  |  |  |  |  |  |  |  |     |     |     |     |     |     |     |     |     |     |     |     |    |    |    |  |  |  |  |  |     |     |     |   |     |    |  |  |  |  |  |  |  |  |     |     |   |     |     |     |     |     |     |     |     |     |     |  |  |  |  |  |  |     |  |     |     |     |     |     |     |    |    |  |  |  |  |  |  |  |     |     |     |     |     |     |     |     |     |     |     |     |    |    |    |  |  |  |  |  |  |  |  |     |     |     |   |     |   |  |  |  |  |  |     |  |  |     |     |     |     |     |     |     |     |    |     |  |  |  |  |  |  |  |  |  |  |     |     |     |     |     |     |     |    |   |  |  |  |  |     |     |     |     |     |     |     |     |     |     |     |     |    |    |    |  |  |  |  |  |  |  |  |  |  |  |  |     |     |   |     |   |  |  |  |  |  |     |     |     |     |     |     |     |     |    |     |  |  |  |  |  |  |  |  |  |  |  |  |  |  |     |     |     |     |    |     |  |  |  |  |  |     |     |     |     |     |     |     |     |     |     |    |    |    |  |  |  |  |  |  |  |  |  |  |  |     |     |     |     |     |     |    |    |   |  |     |     |     |     |     |     |     |     |     |    |     |  |  |  |  |  |  |  |  |  |  |  |  |  |  |  |  |  |  |     |     |   |     |     |  |  |  |     |     |     |     |     |     |     |     |     |    |    |    |  |  |  |  |  |  |  |  |  |  |  |  |  |  |  |     |     |     |     |     |   |    |     |     |     |     |     |     |     |     |    |     |  |  |  |  |  |  |  |  |  |  |  |  |  |  |  |  |  |  |  |     |     |     |     |    |    |     |     |     |     |     |     |     |     |     |     |    |    |   |  |  |  |  |  |  |  |  |  |  |  |  |  |  |  |  |  |  |     |     |   |     |     |     |    |     |     |     |     |     |     |     |  |  |  |  |  |  |  |  |  |  |  |  |  |  |  |  |  |  |  |  |  |  |  |     |     |     |     |     |     |     |     |     |     |     |     |    |    |   |  |  |  |  |  |  |  |  |  |  |  |  |  |  |  |  |  |  |  |  |     |     |     |     |     |     |   |     |     |     |     |     |  |  |  |  |  |  |  |  |  |  |  |  |  |  |  |  |  |  |  |  |  |  |  |  |  |  |     |     |     |    |     |     |     |     |     |    |    |    |  |  |  |  |  |  |  |  |  |  |  |  |  |  |  |  |  |  |  |  |  |  |     |     |   |    |   |     |     |     |     |     |  |  |  |  |  |  |  |  |  |  |  |  |  |  |  |  |  |  |  |  |  |  |  |  |  |  |     |  |  |     |     |     |     |     |     |    |    |    |  |  |  |  |  |  |  |  |  |  |  |  |  |  |  |  |  |  |  |  |  |  |     |     |   |    |     |     |   |     |     |     |     |     |   |    |   |  |  |  |  |  |  |  |  |  |  |  |  |  |  |  |  |  |  |  |  |  |     |  |  |  |     |  |     |     |     |    |     |    |  |  |  |  |  |  |  |  |  |  |  |  |  |  |  |  |  |  |  |  |  |  |     |     |   |    |   |  |  |     |     |     |     |     |     |    |    |    |  |  |  |  |  |  |  |  |  |  |  |  |  |  |  |  |  |  |  |  |     |  |  |  |  |  |     |     |     |   |     |     |  |  |  |  |  |  |  |  |  |  |  |  |  |  |  |  |  |  |  |  |  |  |     |     |   |    |    |  |  |  |  |     |     |     |     |    |     |     |   |    |    |  |  |  |  |  |  |  |  |  |  |  |  |  |  |  |  |  |     |  |  |  |  |  |  |     |  |     |     |     |     |     |     |   |    |    |  |  |  |  |  |  |  |  |  |  |  |  |  |  |  |  |     |     |   |    |   |  |  |  |     |     |     |     |     |    |     |     |  |     |     |   |    |   |  |  |  |  |  |  |  |  |  |  |  |  |  |  |     |  |  |  |  |  |  |  |  |  |     |     |     |     |     |   |    |     |   |    |    |  |  |  |  |  |  |  |  |  |  |  |  |  |     |  |  |  |  |  |  |  |  |     |  |     |     |   |    |     |  |     |     |  |  |  |  |  |  |  |  |  |  |  |  |  |  |  |  |     |     |   |    |    |  |  |  |  |  |     |     |     |   |     |     |   |    |    |  |     |     |   |    |    |  |  |  |  |  |  |  |  |  |  |  |     |  |  |  |  |  |  |  |  |     |  |  |  |  |     |  |  |  |  |  |     |  |  |  |  |  |  |  |  |  |  |  |  |  |     |  |  |  |  |  |  |  |  |  |  |  |  |  |     |     |   |    |    |  |     |  |  |     |     |   |    |    |  |  |  |  |  |  |     |     |     |   |    |    |  |  |  |  |  |  |  |  |  |  |     |  |     |     |   |    |   |     |     |     |   |    |    |  |  |  |  |  |  |  |  |     |  |  |  |  |  |  |  |  |  |  |  |     |     |     |   |    |     |  |  |  |     |  |     |  |  |  |  |  |  |  |  |  |  |     |     |   |    |    |  |  |  |  |  |  |  |  |  |  |     |  |     |     |   |    |    |  |  |  |  |     |     |   |    |    |  |  |  |  |  |     |  |  |  |  |  |  |  |  |  |  |  |  |     |  |  |  |     |  |  |  |  |  |  |  |  |     |  |  |  |  |  |  |  |     |     |   |    |   |  |  |  |  |  |  |  |  |  |     |     |     |     |     |   |    |    |  |  |  |     |  |  |  |     |     |   |    |   |  |  |     |  |  |  |  |  |  |  |  |  |  |  |  |  |  |  |  |     |  |  |  |  |  |  |  |  |  |  |  |     |  |  |  |  |     |  |  |  |  |  |  |  |  |  |  |  |  |  |  |  |     |     |     |   |    |    |  |  |  |  |  |  |  |     |  |  |  |  |  |     |     |   |    |   |  |  |  |  |  |  |  |  |  |  |  |  |  |     |  |  |  |  |  |  |  |  |  |  |  |  |  |     |     |   |    |     |  |  |  |  |  |  |  |  |  |  |  |  |  |  |     |  |  |  |  |  |  |  |  |  |  |  |  |  |  |  |  |     |  |     |     |   |    |    |  |  |  |  |  |  |  |  |  |  |  |  |  |  |  |  |  |  |  |  |  |  |  |  |  |  |  |  |  |  |     |     |   |    |    |  |  |  |  |  |  |  |  |  |  |  |  |  |  |  |  |  |  |  |  |  |  |  |  |  |  |  |  |  |     |
| 040        | 185       | M   | 90  | 9                         |        |            |       |        |          |          |        |          |            |    |            |       |        |          |          |        |          |        |    |            |       |        |       |        |                                |          |          |        |          |        |    | 320 |     |     |  |  |  |  |  |  |  |  |  |  |  |  |  |  |  |  |  |  |  |  |  |  |  |  |  |  |  |  |  |  |     | 043 | 040 | M   | 63  | 9   |    |    |    |  |  |  |  |  |  |  |  |  |  |  |  |  |  |  |  |  |  |  |  |  |  |  |  |  |  |  |     | 103 |     |     |     |     |     |    |    |  |  |  |  |  |  |  |  |  |  |  |  |  |  |  |  |  |  |  |  |  |  |  |  |  |     | 045 | 079 | F   | 91 | 7   |     |     |     |    |    |    |  |  |  |  |  |  |  |  |  |  |  |  |  |  |  |  |  |  |  |  |  |  |  |  |  | 147 |     |     |     |     |     |    |    |     |     |  |  |  |  |  |  |  |  |  |  |  |  |  |  |  |  |  |  |  |  |  |  |  |     | 179 |     |     |    |     |     |     |     |     |     |     |    |    |    |  |  |  |  |  |  |  |  |  |  |  |  |  |  |  |  |  |  |  |  |  |  |     | yes | 047 | 019 | M   | 74 | 19  |     |     |     |    |     |     |  |  |  |  |  |  |  |  |  |  |  |  |  |  |  |  |  |  |  |  |  |     |     |     |    | 067 |     |     |     |     |    |    |     |     |     |   |    |    |  |  |  |  |  |  |  |  |  |  |  |  |  |  |  |  |  |  |  |     |     | 339 |     |     |     |     |     |    |     |     |     |     |    |    |     |  |  |  |  |  |  |  |  |  |  |  |  |  |  |  |  |  |  |     |     |     |    |     | yes | 049 | 031 | M   | 82 | 10 |    |  |  |  |     |     |   |    |   |  |  |  |  |  |  |  |  |  |  |  |  |  |  |  |  |     |     |     |     |     |     | 106 |     |    |  |  |  |  |     |     |     |     |    |     |    |  |  |  |  |  |  |  |  |  |  |  |  |  |  |     |     |   |    |     |     | yes | 051 | 306 | F   | 60 | 8  |    |     |     |     |   |    |     |     |     |    |   |  |  |  |  |  |  |  |  |  |  |  |  |     |     |     |     |     |     |     |     | 354 |     |     |   |    |   |  |  |     |  |     |     |     |   |     |    |  |  |  |  |  |  |  |  |  |  |  |     |     |     |    |     |     |     | 052 | 041 | F   | 80  | 18  |    |  |  |  |  |     |     |     |     |     |     |     |    |   |  |  |  |  |  |  |  |  |  |  |     |     |     |     |     |     |     | 075 |     |     |     |     |    |    |    |  |  |  |  |  |     |     |     |   |     |    |  |  |  |  |  |  |  |  |     |     |   |     |     |     | yes | 056 | 030 | F   | 79  | 10  |     |  |  |  |  |  |  |     |  |     |     |     |     |     |     |    |    |  |  |  |  |  |  |  |     |     |     |     |     |     |     | 076 |     |     |     |     |    |    |    |  |  |  |  |  |  |  |  |     |     |     |   |     |   |  |  |  |  |  |     |  |  |     |     |     |     |     | 297 |     |     |    |     |  |  |  |  |  |  |  |  |  |  |     |     |     |     |     |     |     |    |   |  |  |  |  |     |     |     |     |     |     |     |     |     | yes | 060 | 257 | F  | 53 | 14 |  |  |  |  |  |  |  |  |  |  |  |  |     |     |   |     |   |  |  |  |  |  |     |     |     |     |     |     |     |     |    | 323 |  |  |  |  |  |  |  |  |  |  |  |  |  |  |     |     |     |     |    |     |  |  |  |  |  |     |     |     |     |     |     |     |     | 061 | 104 | F  | 79 | 13 |  |  |  |  |  |  |  |  |  |  |  |     |     |     |     |     |     |    |    |   |  |     |     |     |     |     |     |     |     |     |    | 312 |  |  |  |  |  |  |  |  |  |  |  |  |  |  |  |  |  |  |     |     |   |     |     |  |  |  |     |     |     |     |     |     |     | 064 | 044 | F  | 75 | 23 |  |  |  |  |  |  |  |  |  |  |  |  |  |  |  |     |     |     |     |     |   |    |     |     |     |     |     |     |     |     |    | 102 |  |  |  |  |  |  |  |  |  |  |  |  |  |  |  |  |  |  |  |     |     |     |     |    |    |     |     |     |     |     |     |     | yes | 065 | 259 | F  | 43 | 9 |  |  |  |  |  |  |  |  |  |  |  |  |  |  |  |  |  |  |     |     |   |     |     |     |    |     |     |     |     |     |     | 322 |  |  |  |  |  |  |  |  |  |  |  |  |  |  |  |  |  |  |  |  |  |  |  |     |     |     |     |     |     |     |     |     |     | 070 | 063 | F  | 48 | 4 |  |  |  |  |  |  |  |  |  |  |  |  |  |  |  |  |  |  |  |  |     |     |     |     |     |     |   |     |     |     |     | 286 |  |  |  |  |  |  |  |  |  |  |  |  |  |  |  |  |  |  |  |  |  |  |  |  |  |  |     |     |     |    |     |     |     | 072 | 025 | F  | 80 | 7  |  |  |  |  |  |  |  |  |  |  |  |  |  |  |  |  |  |  |  |  |  |  |     |     |   |    |   |     |     |     |     | 342 |  |  |  |  |  |  |  |  |  |  |  |  |  |  |  |  |  |  |  |  |  |  |  |  |  |  |     |  |  |     |     |     |     | 076 | 038 | F  | 52 | 7  |  |  |  |  |  |  |  |  |  |  |  |  |  |  |  |  |  |  |  |  |  |  |     |     |   |    |     |     |   |     |     | 098 |     |     |   |    |   |  |  |  |  |  |  |  |  |  |  |  |  |  |  |  |  |  |  |  |  |  |     |  |  |  |     |  |     | 078 | 262 | F  | 85  | 14 |  |  |  |  |  |  |  |  |  |  |  |  |  |  |  |  |  |  |  |  |  |  |     |     |   |    |   |  |  |     |     | 291 |     |     |     |    |    |    |  |  |  |  |  |  |  |  |  |  |  |  |  |  |  |  |  |  |  |  |     |  |  |  |  |  |     | 079 | 314 | F | 88  | 8   |  |  |  |  |  |  |  |  |  |  |  |  |  |  |  |  |  |  |  |  |  |  |     |     |   |    |    |  |  |  |  | 335 |     |     |     |    |     |     |   |    |    |  |  |  |  |  |  |  |  |  |  |  |  |  |  |  |  |  |     |  |  |  |  |  |  | 468 |  |     |     |     |     |     |     |   |    |    |  |  |  |  |  |  |  |  |  |  |  |  |  |  |  |  |     |     |   |    |   |  |  |  | 080 | 054 | F   | 71  | 10  |    |     |     |  |     |     |   |    |   |  |  |  |  |  |  |  |  |  |  |  |  |  |  |     |  |  |  |  |  |  |  |  |  |     | 089 |     |     |     |   |    |     |   |    |    |  |  |  |  |  |  |  |  |  |  |  |  |  |     |  |  |  |  |  |  |  |  |     |  | 131 |     |   |    |     |  |     |     |  |  |  |  |  |  |  |  |  |  |  |  |  |  |  |  |     |     |   |    |    |  |  |  |  |  | yes | 083 | 020 | M | 67  | 18  |   |    |    |  |     |     |   |    |    |  |  |  |  |  |  |  |  |  |  |  |     |  |  |  |  |  |  |  |  |     |  |  |  |  | 088 |  |  |  |  |  |     |  |  |  |  |  |  |  |  |  |  |  |  |  |     |  |  |  |  |  |  |  |  |  |  |  |  |  | 084 | 012 | M | 45 | 23 |  |     |  |  |     |     |   |    |    |  |  |  |  |  |  |     |     |     |   |    |    |  |  |  |  |  |  |  |  |  |  | 021 |  |     |     |   |    |   |     |     |     |   |    |    |  |  |  |  |  |  |  |  |     |  |  |  |  |  |  |  |  |  |  |  |     | 142 | 399 | M | 73 | 7   |  |  |  |     |  |     |  |  |  |  |  |  |  |  |  |  |     |     |   |    |    |  |  |  |  |  |  |  |  |  |  | 427 |  |     |     |   |    |    |  |  |  |  |     |     |   |    |    |  |  |  |  |  |     |  |  |  |  |  |  |  |  |  |  |  |  | 505 |  |  |  |     |  |  |  |  |  |  |  |  |     |  |  |  |  |  |  |  |     |     |   |    |   |  |  |  |  |  |  |  |  |  | 153 | 444 | F   | 85  | 9   |   |    |    |  |  |  |     |  |  |  |     |     |   |    |   |  |  |     |  |  |  |  |  |  |  |  |  |  |  |  |  |  |  |  | 511 |  |  |  |  |  |  |  |  |  |  |  |     |  |  |  |  |     |  |  |  |  |  |  |  |  |  |  |  |  |  |  |  |     | 163 | 361 | F | 47 | 23 |  |  |  |  |  |  |  |     |  |  |  |  |  |     |     |   |    |   |  |  |  |  |  |  |  |  |  |  |  |  |  | 424 |  |  |  |  |  |  |  |  |  |  |  |  |  |     |     |   |    |     |  |  |  |  |  |  |  |  |  |  |  |  |  |  | yes |  |  |  |  |  |  |  |  |  |  |  |  |  |  |  |  |     |  |     |     |   |    |    |  |  |  |  |  |  |  |  |  |  |  |  |  |  |  |  |  |  |  |  |  |  |  |  |  |  |  |  |  |  |     |     |   |    |    |  |  |  |  |  |  |  |  |  |  |  |  |  |  |  |  |  |  |  |  |  |  |  |  |  |  |  |  |  |     |
|            | 320       |     |     |                           |        |            |       |        |          |          |        |          |            |    |            |       |        |          |          |        |          |        |    |            |       |        |       |        |                                |          |          |        |          |        |    |     |     |     |  |  |  |  |  |  |  |  |  |  |  |  |  |  |  |  |  |  |  |  |  |  |  |  |  |  |  |  |  |  |     |     |     |     |     |     |    |    |    |  |  |  |  |  |  |  |  |  |  |  |  |  |  |  |  |  |  |  |  |  |  |  |  |  |  |  |     |     |     |     |     |     |     |    |    |  |  |  |  |  |  |  |  |  |  |  |  |  |  |  |  |  |  |  |  |  |  |  |  |  |     |     |     |     |    |     |     |     |     |    |    |    |  |  |  |  |  |  |  |  |  |  |  |  |  |  |  |  |  |  |  |  |  |  |  |  |  |     |     |     |     |     |     |    |    |     |     |  |  |  |  |  |  |  |  |  |  |  |  |  |  |  |  |  |  |  |  |  |  |  |     |     |     |     |    |     |     |     |     |     |     |     |    |    |    |  |  |  |  |  |  |  |  |  |  |  |  |  |  |  |  |  |  |  |  |  |  |     |     |     |     |     |    |     |     |     |     |    |     |     |  |  |  |  |  |  |  |  |  |  |  |  |  |  |  |  |  |  |  |  |  |     |     |     |    |     |     |     |     |     |    |    |     |     |     |   |    |    |  |  |  |  |  |  |  |  |  |  |  |  |  |  |  |  |  |  |  |     |     |     |     |     |     |     |     |    |     |     |     |     |    |    |     |  |  |  |  |  |  |  |  |  |  |  |  |  |  |  |  |  |  |     |     |     |    |     |     |     |     |     |    |    |    |  |  |  |     |     |   |    |   |  |  |  |  |  |  |  |  |  |  |  |  |  |  |  |  |     |     |     |     |     |     |     |     |    |  |  |  |  |     |     |     |     |    |     |    |  |  |  |  |  |  |  |  |  |  |  |  |  |  |     |     |   |    |     |     |     |     |     |     |    |    |    |     |     |     |   |    |     |     |     |    |   |  |  |  |  |  |  |  |  |  |  |  |  |     |     |     |     |     |     |     |     |     |     |     |   |    |   |  |  |     |  |     |     |     |   |     |    |  |  |  |  |  |  |  |  |  |  |  |     |     |     |    |     |     |     |     |     |     |     |     |    |  |  |  |  |     |     |     |     |     |     |     |    |   |  |  |  |  |  |  |  |  |  |  |     |     |     |     |     |     |     |     |     |     |     |     |    |    |    |  |  |  |  |  |     |     |     |   |     |    |  |  |  |  |  |  |  |  |     |     |   |     |     |     |     |     |     |     |     |     |     |  |  |  |  |  |  |     |  |     |     |     |     |     |     |    |    |  |  |  |  |  |  |  |     |     |     |     |     |     |     |     |     |     |     |     |    |    |    |  |  |  |  |  |  |  |  |     |     |     |   |     |   |  |  |  |  |  |     |  |  |     |     |     |     |     |     |     |     |    |     |  |  |  |  |  |  |  |  |  |  |     |     |     |     |     |     |     |    |   |  |  |  |  |     |     |     |     |     |     |     |     |     |     |     |     |    |    |    |  |  |  |  |  |  |  |  |  |  |  |  |     |     |   |     |   |  |  |  |  |  |     |     |     |     |     |     |     |     |    |     |  |  |  |  |  |  |  |  |  |  |  |  |  |  |     |     |     |     |    |     |  |  |  |  |  |     |     |     |     |     |     |     |     |     |     |    |    |    |  |  |  |  |  |  |  |  |  |  |  |     |     |     |     |     |     |    |    |   |  |     |     |     |     |     |     |     |     |     |    |     |  |  |  |  |  |  |  |  |  |  |  |  |  |  |  |  |  |  |     |     |   |     |     |  |  |  |     |     |     |     |     |     |     |     |     |    |    |    |  |  |  |  |  |  |  |  |  |  |  |  |  |  |  |     |     |     |     |     |   |    |     |     |     |     |     |     |     |     |    |     |  |  |  |  |  |  |  |  |  |  |  |  |  |  |  |  |  |  |  |     |     |     |     |    |    |     |     |     |     |     |     |     |     |     |     |    |    |   |  |  |  |  |  |  |  |  |  |  |  |  |  |  |  |  |  |  |     |     |   |     |     |     |    |     |     |     |     |     |     |     |  |  |  |  |  |  |  |  |  |  |  |  |  |  |  |  |  |  |  |  |  |  |  |     |     |     |     |     |     |     |     |     |     |     |     |    |    |   |  |  |  |  |  |  |  |  |  |  |  |  |  |  |  |  |  |  |  |  |     |     |     |     |     |     |   |     |     |     |     |     |  |  |  |  |  |  |  |  |  |  |  |  |  |  |  |  |  |  |  |  |  |  |  |  |  |  |     |     |     |    |     |     |     |     |     |    |    |    |  |  |  |  |  |  |  |  |  |  |  |  |  |  |  |  |  |  |  |  |  |  |     |     |   |    |   |     |     |     |     |     |  |  |  |  |  |  |  |  |  |  |  |  |  |  |  |  |  |  |  |  |  |  |  |  |  |  |     |  |  |     |     |     |     |     |     |    |    |    |  |  |  |  |  |  |  |  |  |  |  |  |  |  |  |  |  |  |  |  |  |  |     |     |   |    |     |     |   |     |     |     |     |     |   |    |   |  |  |  |  |  |  |  |  |  |  |  |  |  |  |  |  |  |  |  |  |  |     |  |  |  |     |  |     |     |     |    |     |    |  |  |  |  |  |  |  |  |  |  |  |  |  |  |  |  |  |  |  |  |  |  |     |     |   |    |   |  |  |     |     |     |     |     |     |    |    |    |  |  |  |  |  |  |  |  |  |  |  |  |  |  |  |  |  |  |  |  |     |  |  |  |  |  |     |     |     |   |     |     |  |  |  |  |  |  |  |  |  |  |  |  |  |  |  |  |  |  |  |  |  |  |     |     |   |    |    |  |  |  |  |     |     |     |     |    |     |     |   |    |    |  |  |  |  |  |  |  |  |  |  |  |  |  |  |  |  |  |     |  |  |  |  |  |  |     |  |     |     |     |     |     |     |   |    |    |  |  |  |  |  |  |  |  |  |  |  |  |  |  |  |  |     |     |   |    |   |  |  |  |     |     |     |     |     |    |     |     |  |     |     |   |    |   |  |  |  |  |  |  |  |  |  |  |  |  |  |  |     |  |  |  |  |  |  |  |  |  |     |     |     |     |     |   |    |     |   |    |    |  |  |  |  |  |  |  |  |  |  |  |  |  |     |  |  |  |  |  |  |  |  |     |  |     |     |   |    |     |  |     |     |  |  |  |  |  |  |  |  |  |  |  |  |  |  |  |  |     |     |   |    |    |  |  |  |  |  |     |     |     |   |     |     |   |    |    |  |     |     |   |    |    |  |  |  |  |  |  |  |  |  |  |  |     |  |  |  |  |  |  |  |  |     |  |  |  |  |     |  |  |  |  |  |     |  |  |  |  |  |  |  |  |  |  |  |  |  |     |  |  |  |  |  |  |  |  |  |  |  |  |  |     |     |   |    |    |  |     |  |  |     |     |   |    |    |  |  |  |  |  |  |     |     |     |   |    |    |  |  |  |  |  |  |  |  |  |  |     |  |     |     |   |    |   |     |     |     |   |    |    |  |  |  |  |  |  |  |  |     |  |  |  |  |  |  |  |  |  |  |  |     |     |     |   |    |     |  |  |  |     |  |     |  |  |  |  |  |  |  |  |  |  |     |     |   |    |    |  |  |  |  |  |  |  |  |  |  |     |  |     |     |   |    |    |  |  |  |  |     |     |   |    |    |  |  |  |  |  |     |  |  |  |  |  |  |  |  |  |  |  |  |     |  |  |  |     |  |  |  |  |  |  |  |  |     |  |  |  |  |  |  |  |     |     |   |    |   |  |  |  |  |  |  |  |  |  |     |     |     |     |     |   |    |    |  |  |  |     |  |  |  |     |     |   |    |   |  |  |     |  |  |  |  |  |  |  |  |  |  |  |  |  |  |  |  |     |  |  |  |  |  |  |  |  |  |  |  |     |  |  |  |  |     |  |  |  |  |  |  |  |  |  |  |  |  |  |  |  |     |     |     |   |    |    |  |  |  |  |  |  |  |     |  |  |  |  |  |     |     |   |    |   |  |  |  |  |  |  |  |  |  |  |  |  |  |     |  |  |  |  |  |  |  |  |  |  |  |  |  |     |     |   |    |     |  |  |  |  |  |  |  |  |  |  |  |  |  |  |     |  |  |  |  |  |  |  |  |  |  |  |  |  |  |  |  |     |  |     |     |   |    |    |  |  |  |  |  |  |  |  |  |  |  |  |  |  |  |  |  |  |  |  |  |  |  |  |  |  |  |  |  |  |     |     |   |    |    |  |  |  |  |  |  |  |  |  |  |  |  |  |  |  |  |  |  |  |  |  |  |  |  |  |  |  |  |  |     |
| 043        | 040       | M   | 63  | 9                         |        |            |       |        |          |          |        |          |            |    |            |       |        |          |          |        |          |        |    |            |       |        |       |        |                                |          |          |        |          |        |    | 103 |     |     |  |  |  |  |  |  |  |  |  |  |  |  |  |  |  |  |  |  |  |  |  |  |  |  |  |  |  |  |  |  |     | 045 | 079 | F   | 91  | 7   |    |    |    |  |  |  |  |  |  |  |  |  |  |  |  |  |  |  |  |  |  |  |  |  |  |  |  |  |  |  |     | 147 |     |     |     |     |     |    |    |  |  |  |  |  |  |  |  |  |  |  |  |  |  |  |  |  |  |  |  |  |  |  |  |  |     |     | 179 |     |    |     |     |     |     |    |    |    |  |  |  |  |  |  |  |  |  |  |  |  |  |  |  |  |  |  |  |  |  |  |  |  |  |     | yes | 047 | 019 | M   | 74  | 19 |    |     |     |  |  |  |  |  |  |  |  |  |  |  |  |  |  |  |  |  |  |  |  |  |  |  |     |     |     |     |    | 067 |     |     |     |     |     |     |    |    |    |  |  |  |  |  |  |  |  |  |  |  |  |  |  |  |  |  |  |  |  |  |  |     |     |     | 339 |     |    |     |     |     |     |    |     |     |  |  |  |  |  |  |  |  |  |  |  |  |  |  |  |  |  |  |  |  |  |     |     |     |    |     | yes | 049 | 031 | M   | 82 | 10 |     |     |     |   |    |    |  |  |  |  |  |  |  |  |  |  |  |  |  |  |  |  |  |  |  |     |     |     |     |     |     | 106 |     |    |     |     |     |     |    |    |     |  |  |  |  |  |  |  |  |  |  |  |  |  |  |  |  |  |  |     |     |     |    |     |     | yes | 051 | 306 | F  | 60 | 8  |  |  |  |     |     |   |    |   |  |  |  |  |  |  |  |  |  |  |  |  |  |  |  |  |     |     |     |     |     |     |     | 354 |    |  |  |  |  |     |     |     |     |    |     |    |  |  |  |  |  |  |  |  |  |  |  |  |  |  |     |     |   |    |     |     |     | 052 | 041 | F   | 80 | 18 |    |     |     |     |   |    |     |     |     |    |   |  |  |  |  |  |  |  |  |  |  |  |  |     |     |     |     |     |     |     |     | 075 |     |     |   |    |   |  |  |     |  |     |     |     |   |     |    |  |  |  |  |  |  |  |  |  |  |  |     |     |     |    |     |     | yes | 056 | 030 | F   | 79  | 10  |    |  |  |  |  |     |     |     |     |     |     |     |    |   |  |  |  |  |  |  |  |  |  |  |     |     |     |     |     |     |     | 076 |     |     |     |     |    |    |    |  |  |  |  |  |     |     |     |   |     |    |  |  |  |  |  |  |  |  |     |     |   |     |     |     |     |     |     |     |     | 297 |     |  |  |  |  |  |  |     |  |     |     |     |     |     |     |    |    |  |  |  |  |  |  |  |     |     |     |     |     |     |     |     |     | yes | 060 | 257 | F  | 53 | 14 |  |  |  |  |  |  |  |  |     |     |     |   |     |   |  |  |  |  |  |     |  |  |     |     |     |     |     |     |     |     |    | 323 |  |  |  |  |  |  |  |  |  |  |     |     |     |     |     |     |     |    |   |  |  |  |  |     |     |     |     |     |     |     |     |     |     | 061 | 104 | F  | 79 | 13 |  |  |  |  |  |  |  |  |  |  |  |  |     |     |   |     |   |  |  |  |  |  |     |     |     |     |     |     |     |     |    | 312 |  |  |  |  |  |  |  |  |  |  |  |  |  |  |     |     |     |     |    |     |  |  |  |  |  |     |     |     |     |     |     |     |     | 064 | 044 | F  | 75 | 23 |  |  |  |  |  |  |  |  |  |  |  |     |     |     |     |     |     |    |    |   |  |     |     |     |     |     |     |     |     |     |    | 102 |  |  |  |  |  |  |  |  |  |  |  |  |  |  |  |  |  |  |     |     |   |     |     |  |  |  |     |     |     |     |     |     | yes | 065 | 259 | F  | 43 | 9  |  |  |  |  |  |  |  |  |  |  |  |  |  |  |  |     |     |     |     |     |   |    |     |     |     |     |     |     |     |     |    | 322 |  |  |  |  |  |  |  |  |  |  |  |  |  |  |  |  |  |  |  |     |     |     |     |    |    |     |     |     |     |     |     |     |     | 070 | 063 | F  | 48 | 4 |  |  |  |  |  |  |  |  |  |  |  |  |  |  |  |  |  |  |     |     |   |     |     |     |    |     |     |     |     |     |     | 286 |  |  |  |  |  |  |  |  |  |  |  |  |  |  |  |  |  |  |  |  |  |  |  |     |     |     |     |     |     |     |     |     |     | 072 | 025 | F  | 80 | 7 |  |  |  |  |  |  |  |  |  |  |  |  |  |  |  |  |  |  |  |  |     |     |     |     |     |     |   |     |     |     |     | 342 |  |  |  |  |  |  |  |  |  |  |  |  |  |  |  |  |  |  |  |  |  |  |  |  |  |  |     |     |     |    |     |     |     | 076 | 038 | F  | 52 | 7  |  |  |  |  |  |  |  |  |  |  |  |  |  |  |  |  |  |  |  |  |  |  |     |     |   |    |   |     |     |     |     | 098 |  |  |  |  |  |  |  |  |  |  |  |  |  |  |  |  |  |  |  |  |  |  |  |  |  |  |     |  |  |     |     |     |     | 078 | 262 | F  | 85 | 14 |  |  |  |  |  |  |  |  |  |  |  |  |  |  |  |  |  |  |  |  |  |  |     |     |   |    |     |     |   |     |     | 291 |     |     |   |    |   |  |  |  |  |  |  |  |  |  |  |  |  |  |  |  |  |  |  |  |  |  |     |  |  |  |     |  |     | 079 | 314 | F  | 88  | 8  |  |  |  |  |  |  |  |  |  |  |  |  |  |  |  |  |  |  |  |  |  |  |     |     |   |    |   |  |  |     |     | 335 |     |     |     |    |    |    |  |  |  |  |  |  |  |  |  |  |  |  |  |  |  |  |  |  |  |  |     |  |  |  |  |  |     |     | 468 |   |     |     |  |  |  |  |  |  |  |  |  |  |  |  |  |  |  |  |  |  |  |  |  |  |     |     |   |    |    |  |  |  |  |     |     | 080 | 054 | F  | 71  | 10  |   |    |    |  |  |  |  |  |  |  |  |  |  |  |  |  |  |  |  |  |     |  |  |  |  |  |  |     |  |     |     | 089 |     |     |     |   |    |    |  |  |  |  |  |  |  |  |  |  |  |  |  |  |  |  |     |     |   |    |   |  |  |  |     |     |     |     |     |    | 131 |     |  |     |     |   |    |   |  |  |  |  |  |  |  |  |  |  |  |  |  |  |     |  |  |  |  |  |  |  |  |  |     |     | yes | 083 | 020 | M | 67 | 18  |   |    |    |  |  |  |  |  |  |  |  |  |  |  |  |  |     |  |  |  |  |  |  |  |  |     |  |     |     |   |    | 088 |  |     |     |  |  |  |  |  |  |  |  |  |  |  |  |  |  |  |  |     |     |   |    |    |  |  |  |  |  |     |     |     |   | 084 | 012 | M | 45 | 23 |  |     |     |   |    |    |  |  |  |  |  |  |  |  |  |  |  |     |  |  |  |  |  |  |  |  |     |  |  |  |  | 021 |  |  |  |  |  |     |  |  |  |  |  |  |  |  |  |  |  |  |  |     |  |  |  |  |  |  |  |  |  |  |  |  |  | 142 | 399 | M | 73 | 7  |  |     |  |  |     |     |   |    |    |  |  |  |  |  |  |     |     |     |   |    |    |  |  |  |  |  |  |  |  |  |  | 427 |  |     |     |   |    |   |     |     |     |   |    |    |  |  |  |  |  |  |  |  |     |  |  |  |  |  |  |  |  |  |  |  |     |     | 505 |   |    |     |  |  |  |     |  |     |  |  |  |  |  |  |  |  |  |  |     |     |   |    |    |  |  |  |  |  |  |  |  |  |  |     |  | 153 | 444 | F | 85 | 9  |  |  |  |  |     |     |   |    |    |  |  |  |  |  |     |  |  |  |  |  |  |  |  |  |  |  |  |     |  |  |  | 511 |  |  |  |  |  |  |  |  |     |  |  |  |  |  |  |  |     |     |   |    |   |  |  |  |  |  |  |  |  |  |     |     |     | 163 | 361 | F | 47 | 23 |  |  |  |     |  |  |  |     |     |   |    |   |  |  |     |  |  |  |  |  |  |  |  |  |  |  |  |  |  |  |  | 424 |  |  |  |  |  |  |  |  |  |  |  |     |  |  |  |  |     |  |  |  |  |  |  |  |  |  |  |  |  |  |  |  | yes |     |     |   |    |    |  |  |  |  |  |  |  |     |  |  |  |  |  |     |     |   |    |   |  |  |  |  |  |  |  |  |  |  |  |  |  |     |  |  |  |  |  |  |  |  |  |  |  |  |  |     |     |   |    |     |  |  |  |  |  |  |  |  |  |  |  |  |  |  |     |  |  |  |  |  |  |  |  |  |  |  |  |  |  |  |  |     |  |     |     |   |    |    |  |  |  |  |  |  |  |  |  |  |  |  |  |  |  |  |  |  |  |  |  |  |  |  |  |  |  |  |  |  |     |     |   |    |    |  |  |  |  |  |  |  |  |  |  |  |  |  |  |  |  |  |  |  |  |  |  |  |  |  |  |  |  |  |     |
|            | 103       |     |     |                           |        |            |       |        |          |          |        |          |            |    |            |       |        |          |          |        |          |        |    |            |       |        |       |        |                                |          |          |        |          |        |    |     |     |     |  |  |  |  |  |  |  |  |  |  |  |  |  |  |  |  |  |  |  |  |  |  |  |  |  |  |  |  |  |  |     |     |     |     |     |     |    |    |    |  |  |  |  |  |  |  |  |  |  |  |  |  |  |  |  |  |  |  |  |  |  |  |  |  |  |  |     |     |     |     |     |     |     |    |    |  |  |  |  |  |  |  |  |  |  |  |  |  |  |  |  |  |  |  |  |  |  |  |  |  |     |     |     |     |    |     |     |     |     |    |    |    |  |  |  |  |  |  |  |  |  |  |  |  |  |  |  |  |  |  |  |  |  |  |  |  |  |     |     |     |     |     |     |    |    |     |     |  |  |  |  |  |  |  |  |  |  |  |  |  |  |  |  |  |  |  |  |  |  |  |     |     |     |     |    |     |     |     |     |     |     |     |    |    |    |  |  |  |  |  |  |  |  |  |  |  |  |  |  |  |  |  |  |  |  |  |  |     |     |     |     |     |    |     |     |     |     |    |     |     |  |  |  |  |  |  |  |  |  |  |  |  |  |  |  |  |  |  |  |  |  |     |     |     |    |     |     |     |     |     |    |    |     |     |     |   |    |    |  |  |  |  |  |  |  |  |  |  |  |  |  |  |  |  |  |  |  |     |     |     |     |     |     |     |     |    |     |     |     |     |    |    |     |  |  |  |  |  |  |  |  |  |  |  |  |  |  |  |  |  |  |     |     |     |    |     |     |     |     |     |    |    |    |  |  |  |     |     |   |    |   |  |  |  |  |  |  |  |  |  |  |  |  |  |  |  |  |     |     |     |     |     |     |     |     |    |  |  |  |  |     |     |     |     |    |     |    |  |  |  |  |  |  |  |  |  |  |  |  |  |  |     |     |   |    |     |     |     |     |     |     |    |    |    |     |     |     |   |    |     |     |     |    |   |  |  |  |  |  |  |  |  |  |  |  |  |     |     |     |     |     |     |     |     |     |     |     |   |    |   |  |  |     |  |     |     |     |   |     |    |  |  |  |  |  |  |  |  |  |  |  |     |     |     |    |     |     |     |     |     |     |     |     |    |  |  |  |  |     |     |     |     |     |     |     |    |   |  |  |  |  |  |  |  |  |  |  |     |     |     |     |     |     |     |     |     |     |     |     |    |    |    |  |  |  |  |  |     |     |     |   |     |    |  |  |  |  |  |  |  |  |     |     |   |     |     |     |     |     |     |     |     |     |     |  |  |  |  |  |  |     |  |     |     |     |     |     |     |    |    |  |  |  |  |  |  |  |     |     |     |     |     |     |     |     |     |     |     |     |    |    |    |  |  |  |  |  |  |  |  |     |     |     |   |     |   |  |  |  |  |  |     |  |  |     |     |     |     |     |     |     |     |    |     |  |  |  |  |  |  |  |  |  |  |     |     |     |     |     |     |     |    |   |  |  |  |  |     |     |     |     |     |     |     |     |     |     |     |     |    |    |    |  |  |  |  |  |  |  |  |  |  |  |  |     |     |   |     |   |  |  |  |  |  |     |     |     |     |     |     |     |     |    |     |  |  |  |  |  |  |  |  |  |  |  |  |  |  |     |     |     |     |    |     |  |  |  |  |  |     |     |     |     |     |     |     |     |     |     |    |    |    |  |  |  |  |  |  |  |  |  |  |  |     |     |     |     |     |     |    |    |   |  |     |     |     |     |     |     |     |     |     |    |     |  |  |  |  |  |  |  |  |  |  |  |  |  |  |  |  |  |  |     |     |   |     |     |  |  |  |     |     |     |     |     |     |     |     |     |    |    |    |  |  |  |  |  |  |  |  |  |  |  |  |  |  |  |     |     |     |     |     |   |    |     |     |     |     |     |     |     |     |    |     |  |  |  |  |  |  |  |  |  |  |  |  |  |  |  |  |  |  |  |     |     |     |     |    |    |     |     |     |     |     |     |     |     |     |     |    |    |   |  |  |  |  |  |  |  |  |  |  |  |  |  |  |  |  |  |  |     |     |   |     |     |     |    |     |     |     |     |     |     |     |  |  |  |  |  |  |  |  |  |  |  |  |  |  |  |  |  |  |  |  |  |  |  |     |     |     |     |     |     |     |     |     |     |     |     |    |    |   |  |  |  |  |  |  |  |  |  |  |  |  |  |  |  |  |  |  |  |  |     |     |     |     |     |     |   |     |     |     |     |     |  |  |  |  |  |  |  |  |  |  |  |  |  |  |  |  |  |  |  |  |  |  |  |  |  |  |     |     |     |    |     |     |     |     |     |    |    |    |  |  |  |  |  |  |  |  |  |  |  |  |  |  |  |  |  |  |  |  |  |  |     |     |   |    |   |     |     |     |     |     |  |  |  |  |  |  |  |  |  |  |  |  |  |  |  |  |  |  |  |  |  |  |  |  |  |  |     |  |  |     |     |     |     |     |     |    |    |    |  |  |  |  |  |  |  |  |  |  |  |  |  |  |  |  |  |  |  |  |  |  |     |     |   |    |     |     |   |     |     |     |     |     |   |    |   |  |  |  |  |  |  |  |  |  |  |  |  |  |  |  |  |  |  |  |  |  |     |  |  |  |     |  |     |     |     |    |     |    |  |  |  |  |  |  |  |  |  |  |  |  |  |  |  |  |  |  |  |  |  |  |     |     |   |    |   |  |  |     |     |     |     |     |     |    |    |    |  |  |  |  |  |  |  |  |  |  |  |  |  |  |  |  |  |  |  |  |     |  |  |  |  |  |     |     |     |   |     |     |  |  |  |  |  |  |  |  |  |  |  |  |  |  |  |  |  |  |  |  |  |  |     |     |   |    |    |  |  |  |  |     |     |     |     |    |     |     |   |    |    |  |  |  |  |  |  |  |  |  |  |  |  |  |  |  |  |  |     |  |  |  |  |  |  |     |  |     |     |     |     |     |     |   |    |    |  |  |  |  |  |  |  |  |  |  |  |  |  |  |  |  |     |     |   |    |   |  |  |  |     |     |     |     |     |    |     |     |  |     |     |   |    |   |  |  |  |  |  |  |  |  |  |  |  |  |  |  |     |  |  |  |  |  |  |  |  |  |     |     |     |     |     |   |    |     |   |    |    |  |  |  |  |  |  |  |  |  |  |  |  |  |     |  |  |  |  |  |  |  |  |     |  |     |     |   |    |     |  |     |     |  |  |  |  |  |  |  |  |  |  |  |  |  |  |  |  |     |     |   |    |    |  |  |  |  |  |     |     |     |   |     |     |   |    |    |  |     |     |   |    |    |  |  |  |  |  |  |  |  |  |  |  |     |  |  |  |  |  |  |  |  |     |  |  |  |  |     |  |  |  |  |  |     |  |  |  |  |  |  |  |  |  |  |  |  |  |     |  |  |  |  |  |  |  |  |  |  |  |  |  |     |     |   |    |    |  |     |  |  |     |     |   |    |    |  |  |  |  |  |  |     |     |     |   |    |    |  |  |  |  |  |  |  |  |  |  |     |  |     |     |   |    |   |     |     |     |   |    |    |  |  |  |  |  |  |  |  |     |  |  |  |  |  |  |  |  |  |  |  |     |     |     |   |    |     |  |  |  |     |  |     |  |  |  |  |  |  |  |  |  |  |     |     |   |    |    |  |  |  |  |  |  |  |  |  |  |     |  |     |     |   |    |    |  |  |  |  |     |     |   |    |    |  |  |  |  |  |     |  |  |  |  |  |  |  |  |  |  |  |  |     |  |  |  |     |  |  |  |  |  |  |  |  |     |  |  |  |  |  |  |  |     |     |   |    |   |  |  |  |  |  |  |  |  |  |     |     |     |     |     |   |    |    |  |  |  |     |  |  |  |     |     |   |    |   |  |  |     |  |  |  |  |  |  |  |  |  |  |  |  |  |  |  |  |     |  |  |  |  |  |  |  |  |  |  |  |     |  |  |  |  |     |  |  |  |  |  |  |  |  |  |  |  |  |  |  |  |     |     |     |   |    |    |  |  |  |  |  |  |  |     |  |  |  |  |  |     |     |   |    |   |  |  |  |  |  |  |  |  |  |  |  |  |  |     |  |  |  |  |  |  |  |  |  |  |  |  |  |     |     |   |    |     |  |  |  |  |  |  |  |  |  |  |  |  |  |  |     |  |  |  |  |  |  |  |  |  |  |  |  |  |  |  |  |     |  |     |     |   |    |    |  |  |  |  |  |  |  |  |  |  |  |  |  |  |  |  |  |  |  |  |  |  |  |  |  |  |  |  |  |  |     |     |   |    |    |  |  |  |  |  |  |  |  |  |  |  |  |  |  |  |  |  |  |  |  |  |  |  |  |  |  |  |  |  |     |
| 045        | 079       | F   | 91  | 7                         |        |            |       |        |          |          |        |          |            |    |            |       |        |          |          |        |          |        |    |            |       |        |       |        |                                |          |          |        |          |        |    | 147 |     |     |  |  |  |  |  |  |  |  |  |  |  |  |  |  |  |  |  |  |  |  |  |  |  |  |  |  |  |  |  |  |     |     | 179 |     |     |     |    |    |    |  |  |  |  |  |  |  |  |  |  |  |  |  |  |  |  |  |  |  |  |  |  |  |  |  |  |  |     |     | yes | 047 | 019 | M   | 74  | 19 |    |  |  |  |  |  |  |  |  |  |  |  |  |  |  |  |  |  |  |  |  |  |  |  |  |  |     |     |     |     |    | 067 |     |     |     |    |    |    |  |  |  |  |  |  |  |  |  |  |  |  |  |  |  |  |  |  |  |  |  |  |  |  |  |     |     |     | 339 |     |     |    |    |     |     |  |  |  |  |  |  |  |  |  |  |  |  |  |  |  |  |  |  |  |  |  |  |  |     |     |     |     |    |     | yes | 049 | 031 | M   | 82  | 10  |    |    |    |  |  |  |  |  |  |  |  |  |  |  |  |  |  |  |  |  |  |  |  |  |  |     |     |     |     |     |    | 106 |     |     |     |    |     |     |  |  |  |  |  |  |  |  |  |  |  |  |  |  |  |  |  |  |  |  |  |     |     |     |    |     |     | yes | 051 | 306 | F  | 60 | 8   |     |     |   |    |    |  |  |  |  |  |  |  |  |  |  |  |  |  |  |  |  |  |  |  |     |     |     |     |     |     |     | 354 |    |     |     |     |     |    |    |     |  |  |  |  |  |  |  |  |  |  |  |  |  |  |  |  |  |  |     |     |     |    |     |     |     | 052 | 041 | F  | 80 | 18 |  |  |  |     |     |   |    |   |  |  |  |  |  |  |  |  |  |  |  |  |  |  |  |  |     |     |     |     |     |     |     | 075 |    |  |  |  |  |     |     |     |     |    |     |    |  |  |  |  |  |  |  |  |  |  |  |  |  |  |     |     |   |    |     |     | yes | 056 | 030 | F   | 79 | 10 |    |     |     |     |   |    |     |     |     |    |   |  |  |  |  |  |  |  |  |  |  |  |  |     |     |     |     |     |     |     |     | 076 |     |     |   |    |   |  |  |     |  |     |     |     |   |     |    |  |  |  |  |  |  |  |  |  |  |  |     |     |     |    |     |     |     |     |     |     |     | 297 |    |  |  |  |  |     |     |     |     |     |     |     |    |   |  |  |  |  |  |  |  |  |  |  |     |     |     |     |     |     |     |     |     | yes | 060 | 257 | F  | 53 | 14 |  |  |  |  |  |     |     |     |   |     |    |  |  |  |  |  |  |  |  |     |     |   |     |     |     |     |     |     |     |     |     | 323 |  |  |  |  |  |  |     |  |     |     |     |     |     |     |    |    |  |  |  |  |  |  |  |     |     |     |     |     |     |     |     |     |     | 061 | 104 | F  | 79 | 13 |  |  |  |  |  |  |  |  |     |     |     |   |     |   |  |  |  |  |  |     |  |  |     |     |     |     |     |     |     |     |    | 312 |  |  |  |  |  |  |  |  |  |  |     |     |     |     |     |     |     |    |   |  |  |  |  |     |     |     |     |     |     |     |     |     |     | 064 | 044 | F  | 75 | 23 |  |  |  |  |  |  |  |  |  |  |  |  |     |     |   |     |   |  |  |  |  |  |     |     |     |     |     |     |     |     |    | 102 |  |  |  |  |  |  |  |  |  |  |  |  |  |  |     |     |     |     |    |     |  |  |  |  |  |     |     |     |     |     |     |     | yes | 065 | 259 | F  | 43 | 9  |  |  |  |  |  |  |  |  |  |  |  |     |     |     |     |     |     |    |    |   |  |     |     |     |     |     |     |     |     |     |    | 322 |  |  |  |  |  |  |  |  |  |  |  |  |  |  |  |  |  |  |     |     |   |     |     |  |  |  |     |     |     |     |     |     |     | 070 | 063 | F  | 48 | 4  |  |  |  |  |  |  |  |  |  |  |  |  |  |  |  |     |     |     |     |     |   |    |     |     |     |     |     |     |     |     |    | 286 |  |  |  |  |  |  |  |  |  |  |  |  |  |  |  |  |  |  |  |     |     |     |     |    |    |     |     |     |     |     |     |     |     | 072 | 025 | F  | 80 | 7 |  |  |  |  |  |  |  |  |  |  |  |  |  |  |  |  |  |  |     |     |   |     |     |     |    |     |     |     |     |     |     | 342 |  |  |  |  |  |  |  |  |  |  |  |  |  |  |  |  |  |  |  |  |  |  |  |     |     |     |     |     |     |     |     |     |     | 076 | 038 | F  | 52 | 7 |  |  |  |  |  |  |  |  |  |  |  |  |  |  |  |  |  |  |  |  |     |     |     |     |     |     |   |     |     |     |     | 098 |  |  |  |  |  |  |  |  |  |  |  |  |  |  |  |  |  |  |  |  |  |  |  |  |  |  |     |     |     |    |     |     |     | 078 | 262 | F  | 85 | 14 |  |  |  |  |  |  |  |  |  |  |  |  |  |  |  |  |  |  |  |  |  |  |     |     |   |    |   |     |     |     |     | 291 |  |  |  |  |  |  |  |  |  |  |  |  |  |  |  |  |  |  |  |  |  |  |  |  |  |  |     |  |  |     |     |     |     | 079 | 314 | F  | 88 | 8  |  |  |  |  |  |  |  |  |  |  |  |  |  |  |  |  |  |  |  |  |  |  |     |     |   |    |     |     |   |     |     | 335 |     |     |   |    |   |  |  |  |  |  |  |  |  |  |  |  |  |  |  |  |  |  |  |  |  |  |     |  |  |  |     |  |     |     | 468 |    |     |    |  |  |  |  |  |  |  |  |  |  |  |  |  |  |  |  |  |  |  |  |  |  |     |     |   |    |   |  |  |     |     |     |     | 080 | 054 | F  | 71 | 10 |  |  |  |  |  |  |  |  |  |  |  |  |  |  |  |  |  |  |  |  |     |  |  |  |  |  |     |     |     |   |     | 089 |  |  |  |  |  |  |  |  |  |  |  |  |  |  |  |  |  |  |  |  |  |  |     |     |   |    |    |  |  |  |  |     |     |     | 131 |    |     |     |   |    |    |  |  |  |  |  |  |  |  |  |  |  |  |  |  |  |  |  |     |  |  |  |  |  |  |     |  |     |     |     | yes | 083 | 020 | M | 67 | 18 |  |  |  |  |  |  |  |  |  |  |  |  |  |  |  |  |     |     |   |    |   |  |  |  |     |     |     |     |     |    |     | 088 |  |     |     |   |    |   |  |  |  |  |  |  |  |  |  |  |  |  |  |  |     |  |  |  |  |  |  |  |  |  |     |     |     | 084 | 012 | M | 45 | 23  |   |    |    |  |  |  |  |  |  |  |  |  |  |  |  |  |     |  |  |  |  |  |  |  |  |     |  |     |     |   |    | 021 |  |     |     |  |  |  |  |  |  |  |  |  |  |  |  |  |  |  |  |     |     |   |    |    |  |  |  |  |  |     |     |     |   | 142 | 399 | M | 73 | 7  |  |     |     |   |    |    |  |  |  |  |  |  |  |  |  |  |  |     |  |  |  |  |  |  |  |  |     |  |  |  |  | 427 |  |  |  |  |  |     |  |  |  |  |  |  |  |  |  |  |  |  |  |     |  |  |  |  |  |  |  |  |  |  |  |  |  |     | 505 |   |    |    |  |     |  |  |     |     |   |    |    |  |  |  |  |  |  |     |     |     |   |    |    |  |  |  |  |  |  |  |  |  |  |     |  | 153 | 444 | F | 85 | 9 |     |     |     |   |    |    |  |  |  |  |  |  |  |  |     |  |  |  |  |  |  |  |  |  |  |  |     |     |     |   |    | 511 |  |  |  |     |  |     |  |  |  |  |  |  |  |  |  |  |     |     |   |    |    |  |  |  |  |  |  |  |  |  |  |     |  | 163 | 361 | F | 47 | 23 |  |  |  |  |     |     |   |    |    |  |  |  |  |  |     |  |  |  |  |  |  |  |  |  |  |  |  |     |  |  |  | 424 |  |  |  |  |  |  |  |  |     |  |  |  |  |  |  |  |     |     |   |    |   |  |  |  |  |  |  |  |  |  |     |     | yes |     |     |   |    |    |  |  |  |     |  |  |  |     |     |   |    |   |  |  |     |  |  |  |  |  |  |  |  |  |  |  |  |  |  |  |  |     |  |  |  |  |  |  |  |  |  |  |  |     |  |  |  |  |     |  |  |  |  |  |  |  |  |  |  |  |  |  |  |  |     |     |     |   |    |    |  |  |  |  |  |  |  |     |  |  |  |  |  |     |     |   |    |   |  |  |  |  |  |  |  |  |  |  |  |  |  |     |  |  |  |  |  |  |  |  |  |  |  |  |  |     |     |   |    |     |  |  |  |  |  |  |  |  |  |  |  |  |  |  |     |  |  |  |  |  |  |  |  |  |  |  |  |  |  |  |  |     |  |     |     |   |    |    |  |  |  |  |  |  |  |  |  |  |  |  |  |  |  |  |  |  |  |  |  |  |  |  |  |  |  |  |  |  |     |     |   |    |    |  |  |  |  |  |  |  |  |  |  |  |  |  |  |  |  |  |  |  |  |  |  |  |  |  |  |  |  |  |     |
|            | 147       |     |     |                           |        |            |       |        |          |          |        |          |            |    |            |       |        |          |          |        |          |        |    |            |       |        |       |        |                                |          |          |        |          |        |    |     | 179 |     |  |  |  |  |  |  |  |  |  |  |  |  |  |  |  |  |  |  |  |  |  |  |  |  |  |  |  |  |  |  |     |     | yes | 047 | 019 | M   | 74 | 19 |    |  |  |  |  |  |  |  |  |  |  |  |  |  |  |  |  |  |  |  |  |  |  |  |  |  |  |  |     |     |     |     | 067 |     |     |    |    |  |  |  |  |  |  |  |  |  |  |  |  |  |  |  |  |  |  |  |  |  |  |  |  |  |     |     |     |     |    |     | 339 |     |     |    |    |    |  |  |  |  |  |  |  |  |  |  |  |  |  |  |  |  |  |  |  |  |  |  |  |  |  |     |     |     | yes | 049 | 031 | M  | 82 | 10  |     |  |  |  |  |  |  |  |  |  |  |  |  |  |  |  |  |  |  |  |  |  |  |  |     |     |     |     |    |     |     |     | 106 |     |     |     |    |    |    |  |  |  |  |  |  |  |  |  |  |  |  |  |  |  |  |  |  |  |  |  |  |     |     |     |     |     |    |     | yes | 051 | 306 | F  | 60  | 8   |  |  |  |  |  |  |  |  |  |  |  |  |  |  |  |  |  |  |  |  |  |     |     |     |    |     |     |     |     |     |    |    |     |     | 354 |   |    |    |  |  |  |  |  |  |  |  |  |  |  |  |  |  |  |  |  |  |  |     |     |     |     |     |     |     |     |    |     |     | 052 | 041 | F  | 80 | 18  |  |  |  |  |  |  |  |  |  |  |  |  |  |  |  |  |  |  |     |     |     |    |     |     |     |     |     |    |    |    |  |  |  |     | 075 |   |    |   |  |  |  |  |  |  |  |  |  |  |  |  |  |  |  |  |     |     |     |     |     |     |     |     |    |  |  |  |  | yes | 056 | 030 | F   | 79 | 10  |    |  |  |  |  |  |  |  |  |  |  |  |  |  |  |     |     |   |    |     |     |     |     |     |     |    |    |    |     |     |     |   |    |     | 076 |     |    |   |  |  |  |  |  |  |  |  |  |  |  |  |     |     |     |     |     |     |     |     |     |     |     |   |    |   |  |  |     |  |     | 297 |     |   |     |    |  |  |  |  |  |  |  |  |  |  |  |     |     |     |    |     |     |     |     |     |     |     |     |    |  |  |  |  |     | yes | 060 | 257 | F   | 53  | 14  |    |   |  |  |  |  |  |  |  |  |  |  |     |     |     |     |     |     |     |     |     |     |     |     |    |    |    |  |  |  |  |  |     |     | 323 |   |     |    |  |  |  |  |  |  |  |  |     |     |   |     |     |     |     |     |     |     |     |     |     |  |  |  |  |  |  |     |  |     | 061 | 104 | F   | 79  | 13  |    |    |  |  |  |  |  |  |  |     |     |     |     |     |     |     |     |     |     |     |     |    |    |    |  |  |  |  |  |  |  |  |     |     | 312 |   |     |   |  |  |  |  |  |     |  |  |     |     |     |     |     |     |     |     |    |     |  |  |  |  |  |  |  |  |  |  |     |     | 064 | 044 | F   | 75  | 23  |    |   |  |  |  |  |     |     |     |     |     |     |     |     |     |     |     |     |    |    |    |  |  |  |  |  |  |  |  |  |  |  |  |     | 102 |   |     |   |  |  |  |  |  |     |     |     |     |     |     |     |     |    |     |  |  |  |  |  |  |  |  |  |  |  |  |  |  | yes | 065 | 259 | F   | 43 | 9   |  |  |  |  |  |     |     |     |     |     |     |     |     |     |     |    |    |    |  |  |  |  |  |  |  |  |  |  |  |     |     |     |     |     | 322 |    |    |   |  |     |     |     |     |     |     |     |     |     |    |     |  |  |  |  |  |  |  |  |  |  |  |  |  |  |  |  |  |  | 070 | 063 | F | 48  | 4   |  |  |  |     |     |     |     |     |     |     |     |     |    |    |    |  |  |  |  |  |  |  |  |  |  |  |  |  |  |  |     |     |     |     | 286 |   |    |     |     |     |     |     |     |     |     |    |     |  |  |  |  |  |  |  |  |  |  |  |  |  |  |  |  |  |  |  |     |     | 072 | 025 | F  | 80 | 7   |     |     |     |     |     |     |     |     |     |    |    |   |  |  |  |  |  |  |  |  |  |  |  |  |  |  |  |  |  |  |     |     |   |     | 342 |     |    |     |     |     |     |     |     |     |  |  |  |  |  |  |  |  |  |  |  |  |  |  |  |  |  |  |  |  |  |  |  |     | 076 | 038 | F   | 52  | 7   |     |     |     |     |     |     |    |    |   |  |  |  |  |  |  |  |  |  |  |  |  |  |  |  |  |  |  |  |  |     |     |     |     |     | 098 |   |     |     |     |     |     |  |  |  |  |  |  |  |  |  |  |  |  |  |  |  |  |  |  |  |  |  |  |  |  |  |  |     | 078 | 262 | F  | 85  | 14  |     |     |     |    |    |    |  |  |  |  |  |  |  |  |  |  |  |  |  |  |  |  |  |  |  |  |  |  |     |     |   |    |   |     | 291 |     |     |     |  |  |  |  |  |  |  |  |  |  |  |  |  |  |  |  |  |  |  |  |  |  |  |  |  |  |     |  |  |     | 079 | 314 | F   |     | 88  |    |    | 8  |  |  |  |  |  |  |  |  |  |  |  |  |  |  |  |  |  |  |  |  |  |  |     |     |   |    |     |     |   |     |     | 335 |     |     |   |    |   |  |  |  |  |  |  |  |  |  |  |  |  |  |  |  |  |  |  |  |  |  |     |  |  |  |     |  |     | 468 |     |    |     |    |  |  |  |  |  |  |  |  |  |  |  |  |  |  |  |  |  |  |  |  |  |  |     |     |   |    |   |  |  |     | 080 | 054 | F   |     | 71  |    |    | 10 |  |  |  |  |  |  |  |  |  |  |  |  |  |  |  |  |  |  |  |  |     |  |  |  |  |  |     |     |     |   |     | 089 |  |  |  |  |  |  |  |  |  |  |  |  |  |  |  |  |  |  |  |  |  |  |     |     |   |    |    |  |  |  |  |     |     | 131 |     |    |     |     |   |    |    |  |  |  |  |  |  |  |  |  |  |  |  |  |  |  |  |  |     |  |  |  |  |  |  |     |  | yes | 083 | 020 | M   |     | 67  |   |    | 18 |  |  |  |  |  |  |  |  |  |  |  |  |  |  |  |  |     |     |   |    |   |  |  |  |     |     |     |     |     |    |     | 088 |  |     |     |   |    |   |  |  |  |  |  |  |  |  |  |  |  |  |  |  |     |  |  |  |  |  |  |  |  |  |     |     |     |     | 084 |   |    | 012 | M | 45 | 23 |  |  |  |  |  |  |  |  |  |  |  |  |  |     |  |  |  |  |  |  |  |  |     |  |     |     |   |    |     |  |     | 021 |  |  |  |  |  |  |  |  |  |  |  |  |  |  |  |  |     |     |   |    |    |  |  |  |  |  |     |     |     |   |     |     |   |    |    |  | 142 | 399 | M | 73 | 7  |  |  |  |  |  |  |  |  |  |  |  |     |  |  |  |  |  |  |  |  |     |  |  |  |  |     |  |  |  |  |  | 427 |  |  |  |  |  |  |  |  |  |  |  |  |  |     |  |  |  |  |  |  |  |  |  |  |  |  |  |     |     |   |    |    |  | 505 |  |  |     |     |   |    |    |  |  |  |  |  |  |     |     |     |   |    |    |  |  |  |  |  |  |  |  |  |  |     |  |     |     |   |    |   |     | 153 | 444 | F | 85 | 9  |  |  |  |  |  |  |  |  |     |  |  |  |  |  |  |  |  |  |  |  |     |     |     |   |    |     |  |  |  |     |  | 511 |  |  |  |  |  |  |  |  |  |  |     |     |   |    |    |  |  |  |  |  |  |  |  |  |  |     |  |     |     |   |    |    |  |  |  |  | 163 | 361 | F | 47 | 23 |  |  |  |  |  |     |  |  |  |  |  |  |  |  |  |  |  |  |     |  |  |  |     |  |  |  |  |  |  |  |  | 424 |  |  |  |  |  |  |  |     |     |   |    |   |  |  |  |  |  |  |  |  |  |     |     |     |     |     |   |    |    |  |  |  | yes |  |  |  |     |     |   |    |   |  |  |     |  |  |  |  |  |  |  |  |  |  |  |  |  |  |  |  |     |  |  |  |  |  |  |  |  |  |  |  |     |  |  |  |  |     |  |  |  |  |  |  |  |  |  |  |  |  |  |  |  |     |     |     |   |    |    |  |  |  |  |  |  |  |     |  |  |  |  |  |     |     |   |    |   |  |  |  |  |  |  |  |  |  |  |  |  |  |     |  |  |  |  |  |  |  |  |  |  |  |  |  |     |     |   |    |     |  |  |  |  |  |  |  |  |  |  |  |  |  |  |     |  |  |  |  |  |  |  |  |  |  |  |  |  |  |  |  |     |  |     |     |   |    |    |  |  |  |  |  |  |  |  |  |  |  |  |  |  |  |  |  |  |  |  |  |  |  |  |  |  |  |  |  |  |     |     |   |    |    |  |  |  |  |  |  |  |  |  |  |  |  |  |  |  |  |  |  |  |  |  |  |  |  |  |  |  |  |  |     |
|            | 179       |     |     |                           |        |            |       |        |          |          |        |          |            |    |            |       |        |          |          |        |          |        |    |            |       |        |       |        |                                |          |          |        |          |        |    |     | yes |     |  |  |  |  |  |  |  |  |  |  |  |  |  |  |  |  |  |  |  |  |  |  |  |  |  |  |  |  |  |  |     |     |     |     |     |     |    |    |    |  |  |  |  |  |  |  |  |  |  |  |  |  |  |  |  |  |  |  |  |  |  |  |  |  |  |  |     |     |     |     |     |     |     |    |    |  |  |  |  |  |  |  |  |  |  |  |  |  |  |  |  |  |  |  |  |  |  |  |  |  |     |     |     |     |    |     |     |     |     |    |    |    |  |  |  |  |  |  |  |  |  |  |  |  |  |  |  |  |  |  |  |  |  |  |  |  |  |     |     |     |     |     |     |    |    |     |     |  |  |  |  |  |  |  |  |  |  |  |  |  |  |  |  |  |  |  |  |  |  |  |     |     |     |     |    |     |     |     |     |     |     |     |    |    |    |  |  |  |  |  |  |  |  |  |  |  |  |  |  |  |  |  |  |  |  |  |  |     |     |     |     |     |    |     |     |     |     |    |     |     |  |  |  |  |  |  |  |  |  |  |  |  |  |  |  |  |  |  |  |  |  |     |     |     |    |     |     |     |     |     |    |    |     |     |     |   |    |    |  |  |  |  |  |  |  |  |  |  |  |  |  |  |  |  |  |  |  |     |     |     |     |     |     |     |     |    |     |     |     |     |    |    |     |  |  |  |  |  |  |  |  |  |  |  |  |  |  |  |  |  |  |     |     |     |    |     |     |     |     |     |    |    |    |  |  |  |     |     |   |    |   |  |  |  |  |  |  |  |  |  |  |  |  |  |  |  |  |     |     |     |     |     |     |     |     |    |  |  |  |  |     |     |     |     |    |     |    |  |  |  |  |  |  |  |  |  |  |  |  |  |  |     |     |   |    |     |     |     |     |     |     |    |    |    |     |     |     |   |    |     |     |     |    |   |  |  |  |  |  |  |  |  |  |  |  |  |     |     |     |     |     |     |     |     |     |     |     |   |    |   |  |  |     |  |     |     |     |   |     |    |  |  |  |  |  |  |  |  |  |  |  |     |     |     |    |     |     |     |     |     |     |     |     |    |  |  |  |  |     |     |     |     |     |     |     |    |   |  |  |  |  |  |  |  |  |  |  |     |     |     |     |     |     |     |     |     |     |     |     |    |    |    |  |  |  |  |  |     |     |     |   |     |    |  |  |  |  |  |  |  |  |     |     |   |     |     |     |     |     |     |     |     |     |     |  |  |  |  |  |  |     |  |     |     |     |     |     |     |    |    |  |  |  |  |  |  |  |     |     |     |     |     |     |     |     |     |     |     |     |    |    |    |  |  |  |  |  |  |  |  |     |     |     |   |     |   |  |  |  |  |  |     |  |  |     |     |     |     |     |     |     |     |    |     |  |  |  |  |  |  |  |  |  |  |     |     |     |     |     |     |     |    |   |  |  |  |  |     |     |     |     |     |     |     |     |     |     |     |     |    |    |    |  |  |  |  |  |  |  |  |  |  |  |  |     |     |   |     |   |  |  |  |  |  |     |     |     |     |     |     |     |     |    |     |  |  |  |  |  |  |  |  |  |  |  |  |  |  |     |     |     |     |    |     |  |  |  |  |  |     |     |     |     |     |     |     |     |     |     |    |    |    |  |  |  |  |  |  |  |  |  |  |  |     |     |     |     |     |     |    |    |   |  |     |     |     |     |     |     |     |     |     |    |     |  |  |  |  |  |  |  |  |  |  |  |  |  |  |  |  |  |  |     |     |   |     |     |  |  |  |     |     |     |     |     |     |     |     |     |    |    |    |  |  |  |  |  |  |  |  |  |  |  |  |  |  |  |     |     |     |     |     |   |    |     |     |     |     |     |     |     |     |    |     |  |  |  |  |  |  |  |  |  |  |  |  |  |  |  |  |  |  |  |     |     |     |     |    |    |     |     |     |     |     |     |     |     |     |     |    |    |   |  |  |  |  |  |  |  |  |  |  |  |  |  |  |  |  |  |  |     |     |   |     |     |     |    |     |     |     |     |     |     |     |  |  |  |  |  |  |  |  |  |  |  |  |  |  |  |  |  |  |  |  |  |  |  |     |     |     |     |     |     |     |     |     |     |     |     |    |    |   |  |  |  |  |  |  |  |  |  |  |  |  |  |  |  |  |  |  |  |  |     |     |     |     |     |     |   |     |     |     |     |     |  |  |  |  |  |  |  |  |  |  |  |  |  |  |  |  |  |  |  |  |  |  |  |  |  |  |     |     |     |    |     |     |     |     |     |    |    |    |  |  |  |  |  |  |  |  |  |  |  |  |  |  |  |  |  |  |  |  |  |  |     |     |   |    |   |     |     |     |     |     |  |  |  |  |  |  |  |  |  |  |  |  |  |  |  |  |  |  |  |  |  |  |  |  |  |  |     |  |  |     |     |     |     |     |     |    |    |    |  |  |  |  |  |  |  |  |  |  |  |  |  |  |  |  |  |  |  |  |  |  |     |     |   |    |     |     |   |     |     |     |     |     |   |    |   |  |  |  |  |  |  |  |  |  |  |  |  |  |  |  |  |  |  |  |  |  |     |  |  |  |     |  |     |     |     |    |     |    |  |  |  |  |  |  |  |  |  |  |  |  |  |  |  |  |  |  |  |  |  |  |     |     |   |    |   |  |  |     |     |     |     |     |     |    |    |    |  |  |  |  |  |  |  |  |  |  |  |  |  |  |  |  |  |  |  |  |     |  |  |  |  |  |     |     |     |   |     |     |  |  |  |  |  |  |  |  |  |  |  |  |  |  |  |  |  |  |  |  |  |  |     |     |   |    |    |  |  |  |  |     |     |     |     |    |     |     |   |    |    |  |  |  |  |  |  |  |  |  |  |  |  |  |  |  |  |  |     |  |  |  |  |  |  |     |  |     |     |     |     |     |     |   |    |    |  |  |  |  |  |  |  |  |  |  |  |  |  |  |  |  |     |     |   |    |   |  |  |  |     |     |     |     |     |    |     |     |  |     |     |   |    |   |  |  |  |  |  |  |  |  |  |  |  |  |  |  |     |  |  |  |  |  |  |  |  |  |     |     |     |     |     |   |    |     |   |    |    |  |  |  |  |  |  |  |  |  |  |  |  |  |     |  |  |  |  |  |  |  |  |     |  |     |     |   |    |     |  |     |     |  |  |  |  |  |  |  |  |  |  |  |  |  |  |  |  |     |     |   |    |    |  |  |  |  |  |     |     |     |   |     |     |   |    |    |  |     |     |   |    |    |  |  |  |  |  |  |  |  |  |  |  |     |  |  |  |  |  |  |  |  |     |  |  |  |  |     |  |  |  |  |  |     |  |  |  |  |  |  |  |  |  |  |  |  |  |     |  |  |  |  |  |  |  |  |  |  |  |  |  |     |     |   |    |    |  |     |  |  |     |     |   |    |    |  |  |  |  |  |  |     |     |     |   |    |    |  |  |  |  |  |  |  |  |  |  |     |  |     |     |   |    |   |     |     |     |   |    |    |  |  |  |  |  |  |  |  |     |  |  |  |  |  |  |  |  |  |  |  |     |     |     |   |    |     |  |  |  |     |  |     |  |  |  |  |  |  |  |  |  |  |     |     |   |    |    |  |  |  |  |  |  |  |  |  |  |     |  |     |     |   |    |    |  |  |  |  |     |     |   |    |    |  |  |  |  |  |     |  |  |  |  |  |  |  |  |  |  |  |  |     |  |  |  |     |  |  |  |  |  |  |  |  |     |  |  |  |  |  |  |  |     |     |   |    |   |  |  |  |  |  |  |  |  |  |     |     |     |     |     |   |    |    |  |  |  |     |  |  |  |     |     |   |    |   |  |  |     |  |  |  |  |  |  |  |  |  |  |  |  |  |  |  |  |     |  |  |  |  |  |  |  |  |  |  |  |     |  |  |  |  |     |  |  |  |  |  |  |  |  |  |  |  |  |  |  |  |     |     |     |   |    |    |  |  |  |  |  |  |  |     |  |  |  |  |  |     |     |   |    |   |  |  |  |  |  |  |  |  |  |  |  |  |  |     |  |  |  |  |  |  |  |  |  |  |  |  |  |     |     |   |    |     |  |  |  |  |  |  |  |  |  |  |  |  |  |  |     |  |  |  |  |  |  |  |  |  |  |  |  |  |  |  |  |     |  |     |     |   |    |    |  |  |  |  |  |  |  |  |  |  |  |  |  |  |  |  |  |  |  |  |  |  |  |  |  |  |  |  |  |  |     |     |   |    |    |  |  |  |  |  |  |  |  |  |  |  |  |  |  |  |  |  |  |  |  |  |  |  |  |  |  |  |  |  |     |
| 047        | 019       | M   | 74  | 19                        |        |            |       |        |          |          |        |          |            |    |            |       |        |          |          |        |          |        |    |            |       |        |       |        |                                |          |          |        |          |        |    | 067 |     |     |  |  |  |  |  |  |  |  |  |  |  |  |  |  |  |  |  |  |  |  |  |  |  |  |  |  |  |  |  |  |     | 339 |     |     |     |     |    |    |    |  |  |  |  |  |  |  |  |  |  |  |  |  |  |  |  |  |  |  |  |  |  |  |  |  |  |  |     |     | yes | 049 | 031 | M   | 82  | 10 |    |  |  |  |  |  |  |  |  |  |  |  |  |  |  |  |  |  |  |  |  |  |  |  |  |  |     |     |     |     |    | 106 |     |     |     |    |    |    |  |  |  |  |  |  |  |  |  |  |  |  |  |  |  |  |  |  |  |  |  |  |  |  |  |     |     | yes | 051 | 306 | F   | 60 | 8  |     |     |  |  |  |  |  |  |  |  |  |  |  |  |  |  |  |  |  |  |  |  |  |  |  |     |     |     |     |    |     | 354 |     |     |     |     |     |    |    |    |  |  |  |  |  |  |  |  |  |  |  |  |  |  |  |  |  |  |  |  |  |  |     |     |     | 052 | 041 | F  | 80  | 18  |     |     |    |     |     |  |  |  |  |  |  |  |  |  |  |  |  |  |  |  |  |  |  |  |  |  |     |     |     |    |     | 075 |     |     |     |    |    |     |     |     |   |    |    |  |  |  |  |  |  |  |  |  |  |  |  |  |  |  |  |  |  |  |     |     | yes | 056 | 030 | F   | 79  | 10  |    |     |     |     |     |    |    |     |  |  |  |  |  |  |  |  |  |  |  |  |  |  |  |  |  |  |     |     |     |    |     | 076 |     |     |     |    |    |    |  |  |  |     |     |   |    |   |  |  |  |  |  |  |  |  |  |  |  |  |  |  |  |  |     |     |     |     | 297 |     |     |     |    |  |  |  |  |     |     |     |     |    |     |    |  |  |  |  |  |  |  |  |  |  |  |  |  |  |     |     |   |    |     |     |     | yes | 060 | 257 | F  | 53 | 14 |     |     |     |   |    |     |     |     |    |   |  |  |  |  |  |  |  |  |  |  |  |  |     |     |     |     |     |     |     |     |     | 323 |     |   |    |   |  |  |     |  |     |     |     |   |     |    |  |  |  |  |  |  |  |  |  |  |  |     |     |     |    |     |     |     |     | 061 | 104 | F   | 79  | 13 |  |  |  |  |     |     |     |     |     |     |     |    |   |  |  |  |  |  |  |  |  |  |  |     |     |     |     |     |     |     |     | 312 |     |     |     |    |    |    |  |  |  |  |  |     |     |     |   |     |    |  |  |  |  |  |  |  |  |     |     |   |     |     |     |     |     | 064 | 044 | F   | 75  | 23  |  |  |  |  |  |  |     |  |     |     |     |     |     |     |    |    |  |  |  |  |  |  |  |     |     |     |     |     |     |     |     | 102 |     |     |     |    |    |    |  |  |  |  |  |  |  |  |     |     |     |   |     |   |  |  |  |  |  |     |  |  |     |     |     |     | yes | 065 | 259 | F   | 43 | 9   |  |  |  |  |  |  |  |  |  |  |     |     |     |     |     |     |     |    |   |  |  |  |  |     |     |     |     |     |     |     |     | 322 |     |     |     |    |    |    |  |  |  |  |  |  |  |  |  |  |  |  |     |     |   |     |   |  |  |  |  |  |     |     |     |     |     | 070 | 063 | F   | 48 | 4   |  |  |  |  |  |  |  |  |  |  |  |  |  |  |     |     |     |     |    |     |  |  |  |  |  |     |     |     |     |     |     | 286 |     |     |     |    |    |    |  |  |  |  |  |  |  |  |  |  |  |     |     |     |     |     |     |    |    |   |  |     |     |     |     |     |     | 072 | 025 | F   | 80 | 7   |  |  |  |  |  |  |  |  |  |  |  |  |  |  |  |  |  |  |     |     |   |     |     |  |  |  |     |     |     |     |     | 342 |     |     |     |    |    |    |  |  |  |  |  |  |  |  |  |  |  |  |  |  |  |     |     |     |     |     |   |    |     |     |     |     |     | 076 | 038 | F   | 52 | 7   |  |  |  |  |  |  |  |  |  |  |  |  |  |  |  |  |  |  |  |     |     |     |     |    |    |     |     |     |     |     |     | 098 |     |     |     |    |    |   |  |  |  |  |  |  |  |  |  |  |  |  |  |  |  |  |  |  |     |     |   |     |     |     |    |     |     | 078 | 262 | F   | 85  | 14  |  |  |  |  |  |  |  |  |  |  |  |  |  |  |  |  |  |  |  |  |  |  |  |     |     |     |     |     |     |     |     | 291 |     |     |     |    |    |   |  |  |  |  |  |  |  |  |  |  |  |  |  |  |  |  |  |  |  |  |     |     |     |     |     |     |   | 079 | 314 | F   | 88  | 8   |  |  |  |  |  |  |  |  |  |  |  |  |  |  |  |  |  |  |  |  |  |  |  |  |  |  |     |     |     |    |     | 335 |     |     |     |    |    |    |  |  |  |  |  |  |  |  |  |  |  |  |  |  |  |  |  |  |  |  |  |  |     |     |   |    |   | 468 |     |     |     |     |  |  |  |  |  |  |  |  |  |  |  |  |  |  |  |  |  |  |  |  |  |  |  |  |  |  |     |  |  |     |     | 080 |     | 054 |     | F  | 71 | 10 |  |  |  |  |  |  |  |  |  |  |  |  |  |  |  |  |  |  |  |  |  |  |     |     |   |    |     |     |   |     |     | 089 |     |     |   |    |   |  |  |  |  |  |  |  |  |  |  |  |  |  |  |  |  |  |  |  |  |  |     |  |  |  |     |  |     | 131 |     |    |     |    |  |  |  |  |  |  |  |  |  |  |  |  |  |  |  |  |  |  |  |  |  |  |     |     |   |    |   |  |  | yes |     | 083 |     | 020 |     | M  | 67 | 18 |  |  |  |  |  |  |  |  |  |  |  |  |  |  |  |  |  |  |  |  |     |  |  |  |  |  |     |     |     |   |     | 088 |  |  |  |  |  |  |  |  |  |  |  |  |  |  |  |  |  |  |  |  |  |  |     |     |   |    |    |  |  |  |  |     |     | 084 | 012 | M  | 45  | 23  |   |    |    |  |  |  |  |  |  |  |  |  |  |  |  |  |  |  |  |  |     |  |  |  |  |  |  |     |  |     |     | 021 |     |     |     |   |    |    |  |  |  |  |  |  |  |  |  |  |  |  |  |  |  |  |     |     |   |    |   |  |  |  |     |     |     | 142 | 399 | M  | 73  | 7   |  |     |     |   |    |   |  |  |  |  |  |  |  |  |  |  |  |  |  |  |     |  |  |  |  |  |  |  |  |  |     | 427 |     |     |     |   |    |     |   |    |    |  |  |  |  |  |  |  |  |  |  |  |  |  |     |  |  |  |  |  |  |  |  |     |  | 505 |     |   |    |     |  |     |     |  |  |  |  |  |  |  |  |  |  |  |  |  |  |  |  |     |     |   |    |    |  |  |  |  |  |     | 153 | 444 | F | 85  | 9   |   |    |    |  |     |     |   |    |    |  |  |  |  |  |  |  |  |  |  |  |     |  |  |  |  |  |  |  |  |     |  |  |  |  | 511 |  |  |  |  |  |     |  |  |  |  |  |  |  |  |  |  |  |  |  |     |  |  |  |  |  |  |  |  |  |  |  |  |  | 163 | 361 | F | 47 | 23 |  |     |  |  |     |     |   |    |    |  |  |  |  |  |  |     |     |     |   |    |    |  |  |  |  |  |  |  |  |  |  | 424 |  |     |     |   |    |   |     |     |     |   |    |    |  |  |  |  |  |  |  |  |     |  |  |  |  |  |  |  |  |  |  |  | yes |     |     |   |    |     |  |  |  |     |  |     |  |  |  |  |  |  |  |  |  |  |     |     |   |    |    |  |  |  |  |  |  |  |  |  |  |     |  |     |     |   |    |    |  |  |  |  |     |     |   |    |    |  |  |  |  |  |     |  |  |  |  |  |  |  |  |  |  |  |  |     |  |  |  |     |  |  |  |  |  |  |  |  |     |  |  |  |  |  |  |  |     |     |   |    |   |  |  |  |  |  |  |  |  |  |     |     |     |     |     |   |    |    |  |  |  |     |  |  |  |     |     |   |    |   |  |  |     |  |  |  |  |  |  |  |  |  |  |  |  |  |  |  |  |     |  |  |  |  |  |  |  |  |  |  |  |     |  |  |  |  |     |  |  |  |  |  |  |  |  |  |  |  |  |  |  |  |     |     |     |   |    |    |  |  |  |  |  |  |  |     |  |  |  |  |  |     |     |   |    |   |  |  |  |  |  |  |  |  |  |  |  |  |  |     |  |  |  |  |  |  |  |  |  |  |  |  |  |     |     |   |    |     |  |  |  |  |  |  |  |  |  |  |  |  |  |  |     |  |  |  |  |  |  |  |  |  |  |  |  |  |  |  |  |     |  |     |     |   |    |    |  |  |  |  |  |  |  |  |  |  |  |  |  |  |  |  |  |  |  |  |  |  |  |  |  |  |  |  |  |  |     |     |   |    |    |  |  |  |  |  |  |  |  |  |  |  |  |  |  |  |  |  |  |  |  |  |  |  |  |  |  |  |  |  |     |
|            | 067       |     |     |                           |        |            |       |        |          |          |        |          |            |    |            |       |        |          |          |        |          |        |    |            |       |        |       |        |                                |          |          |        |          |        |    |     | 339 |     |  |  |  |  |  |  |  |  |  |  |  |  |  |  |  |  |  |  |  |  |  |  |  |  |  |  |  |  |  |  |     |     | yes | 049 | 031 | M   | 82 | 10 |    |  |  |  |  |  |  |  |  |  |  |  |  |  |  |  |  |  |  |  |  |  |  |  |  |  |  |  |     |     |     |     | 106 |     |     |    |    |  |  |  |  |  |  |  |  |  |  |  |  |  |  |  |  |  |  |  |  |  |  |  |  |  |     |     |     |     |    |     | yes | 051 | 306 | F  | 60 | 8  |  |  |  |  |  |  |  |  |  |  |  |  |  |  |  |  |  |  |  |  |  |  |  |  |  |     |     |     |     |     |     |    |    |     | 354 |  |  |  |  |  |  |  |  |  |  |  |  |  |  |  |  |  |  |  |  |  |  |  |     |     |     |     |    |     |     |     |     |     | 052 | 041 | F  | 80 | 18 |  |  |  |  |  |  |  |  |  |  |  |  |  |  |  |  |  |  |  |  |  |  |     |     |     |     |     |    |     |     |     |     |    |     | 075 |  |  |  |  |  |  |  |  |  |  |  |  |  |  |  |  |  |  |  |  |  |     |     |     |    |     |     |     |     |     |    |    | yes | 056 | 030 | F | 79 | 10 |  |  |  |  |  |  |  |  |  |  |  |  |  |  |  |  |  |  |  |     |     |     |     |     |     |     |     |    |     |     |     |     |    |    | 076 |  |  |  |  |  |  |  |  |  |  |  |  |  |  |  |  |  |  |     |     |     |    |     |     |     |     |     |    |    |    |  |  |  |     | 297 |   |    |   |  |  |  |  |  |  |  |  |  |  |  |  |  |  |  |  |     |     |     |     |     |     |     |     |    |  |  |  |  |     | yes | 060 | 257 | F  | 53  | 14 |  |  |  |  |  |  |  |  |  |  |  |  |  |  |     |     |   |    |     |     |     |     |     |     |    |    |    |     |     |     |   |    |     |     | 323 |    |   |  |  |  |  |  |  |  |  |  |  |  |  |     |     |     |     |     |     |     |     |     |     |     |   |    |   |  |  |     |  |     | 061 | 104 | F | 79  | 13 |  |  |  |  |  |  |  |  |  |  |  |     |     |     |    |     |     |     |     |     |     |     |     |    |  |  |  |  |     |     |     |     |     |     | 312 |    |   |  |  |  |  |  |  |  |  |  |  |     |     |     |     |     |     |     |     |     |     |     |     |    |    |    |  |  |  |  |  |     | 064 | 044 | F | 75  | 23 |  |  |  |  |  |  |  |  |     |     |   |     |     |     |     |     |     |     |     |     |     |  |  |  |  |  |  |     |  |     |     |     |     |     | 102 |    |    |  |  |  |  |  |  |  |     |     |     |     |     |     |     |     |     |     |     |     |    |    |    |  |  |  |  |  |  |  |  | yes | 065 | 259 | F | 43  | 9 |  |  |  |  |  |     |  |  |     |     |     |     |     |     |     |     |    |     |  |  |  |  |  |  |  |  |  |  |     |     |     |     |     |     | 322 |    |   |  |  |  |  |     |     |     |     |     |     |     |     |     |     |     |     |    |    |    |  |  |  |  |  |  |  |  |  |  |  |  | 070 | 063 | F | 48  | 4 |  |  |  |  |  |     |     |     |     |     |     |     |     |    |     |  |  |  |  |  |  |  |  |  |  |  |  |  |  |     |     |     |     |    | 286 |  |  |  |  |  |     |     |     |     |     |     |     |     |     |     |    |    |    |  |  |  |  |  |  |  |  |  |  |  |     |     |     |     | 072 | 025 | F  | 80 | 7 |  |     |     |     |     |     |     |     |     |     |    |     |  |  |  |  |  |  |  |  |  |  |  |  |  |  |  |  |  |  |     |     |   |     | 342 |  |  |  |     |     |     |     |     |     |     |     |     |    |    |    |  |  |  |  |  |  |  |  |  |  |  |  |  |  |  |     |     |     | 076 | 038 | F | 52 | 7   |     |     |     |     |     |     |     |    |     |  |  |  |  |  |  |  |  |  |  |  |  |  |  |  |  |  |  |  |     |     |     |     |    |    | 098 |     |     |     |     |     |     |     |     |     |    |    |   |  |  |  |  |  |  |  |  |  |  |  |  |  |  |  |  |  |  |     |     |   | 078 | 262 | F   | 85 | 14  |     |     |     |     |     |     |  |  |  |  |  |  |  |  |  |  |  |  |  |  |  |  |  |  |  |  |  |  |  |     |     |     |     |     | 291 |     |     |     |     |     |     |    |    |   |  |  |  |  |  |  |  |  |  |  |  |  |  |  |  |  |  |  |  |  |     |     |     |     | 079 | 314 | F |     | 88  |     |     | 8   |  |  |  |  |  |  |  |  |  |  |  |  |  |  |  |  |  |  |  |  |  |  |  |  |  |  |     |     |     |    |     | 335 |     |     |     |    |    |    |  |  |  |  |  |  |  |  |  |  |  |  |  |  |  |  |  |  |  |  |  |  |     |     |   |    |   | 468 |     |     |     |     |  |  |  |  |  |  |  |  |  |  |  |  |  |  |  |  |  |  |  |  |  |  |  |  |  |  |     |  |  |     | 080 |     | 054 | F   | 71  |    |    | 10 |  |  |  |  |  |  |  |  |  |  |  |  |  |  |  |  |  |  |  |  |  |  |     |     |   |    |     |     |   |     |     | 089 |     |     |   |    |   |  |  |  |  |  |  |  |  |  |  |  |  |  |  |  |  |  |  |  |  |  |     |  |  |  |     |  |     | 131 |     |    |     |    |  |  |  |  |  |  |  |  |  |  |  |  |  |  |  |  |  |  |  |  |  |  |     |     |   |    |   |  |  | yes | 083 |     | 020 | M   | 67  |    |    | 18 |  |  |  |  |  |  |  |  |  |  |  |  |  |  |  |  |  |  |  |  |     |  |  |  |  |  |     |     |     |   |     | 088 |  |  |  |  |  |  |  |  |  |  |  |  |  |  |  |  |  |  |  |  |  |  |     |     |   |    |    |  |  |  |  |     |     |     | 084 |    |     | 012 | M | 45 | 23 |  |  |  |  |  |  |  |  |  |  |  |  |  |  |  |  |  |     |  |  |  |  |  |  |     |  |     |     |     |     |     | 021 |   |    |    |  |  |  |  |  |  |  |  |  |  |  |  |  |  |  |  |     |     |   |    |   |  |  |  |     |     |     |     |     |    |     |     |  | 142 | 399 | M | 73 | 7 |  |  |  |  |  |  |  |  |  |  |  |  |  |  |     |  |  |  |  |  |  |  |  |  |     |     |     |     |     |   |    | 427 |   |    |    |  |  |  |  |  |  |  |  |  |  |  |  |  |     |  |  |  |  |  |  |  |  |     |  |     |     |   |    |     |  | 505 |     |  |  |  |  |  |  |  |  |  |  |  |  |  |  |  |  |     |     |   |    |    |  |  |  |  |  |     |     |     |   |     |     |   |    |    |  | 153 | 444 | F | 85 | 9  |  |  |  |  |  |  |  |  |  |  |  |     |  |  |  |  |  |  |  |  |     |  |  |  |  |     |  |  |  |  |  | 511 |  |  |  |  |  |  |  |  |  |  |  |  |  |     |  |  |  |  |  |  |  |  |  |  |  |  |  |     |     |   |    |    |  |     |  |  | 163 | 361 | F | 47 | 23 |  |  |  |  |  |  |     |     |     |   |    |    |  |  |  |  |  |  |  |  |  |  |     |  |     |     |   |    |   |     |     | 424 |   |    |    |  |  |  |  |  |  |  |  |     |  |  |  |  |  |  |  |  |  |  |  |     |     |     |   |    |     |  |  |  | yes |  |     |  |  |  |  |  |  |  |  |  |  |     |     |   |    |    |  |  |  |  |  |  |  |  |  |  |     |  |     |     |   |    |    |  |  |  |  |     |     |   |    |    |  |  |  |  |  |     |  |  |  |  |  |  |  |  |  |  |  |  |     |  |  |  |     |  |  |  |  |  |  |  |  |     |  |  |  |  |  |  |  |     |     |   |    |   |  |  |  |  |  |  |  |  |  |     |     |     |     |     |   |    |    |  |  |  |     |  |  |  |     |     |   |    |   |  |  |     |  |  |  |  |  |  |  |  |  |  |  |  |  |  |  |  |     |  |  |  |  |  |  |  |  |  |  |  |     |  |  |  |  |     |  |  |  |  |  |  |  |  |  |  |  |  |  |  |  |     |     |     |   |    |    |  |  |  |  |  |  |  |     |  |  |  |  |  |     |     |   |    |   |  |  |  |  |  |  |  |  |  |  |  |  |  |     |  |  |  |  |  |  |  |  |  |  |  |  |  |     |     |   |    |     |  |  |  |  |  |  |  |  |  |  |  |  |  |  |     |  |  |  |  |  |  |  |  |  |  |  |  |  |  |  |  |     |  |     |     |   |    |    |  |  |  |  |  |  |  |  |  |  |  |  |  |  |  |  |  |  |  |  |  |  |  |  |  |  |  |  |  |  |     |     |   |    |    |  |  |  |  |  |  |  |  |  |  |  |  |  |  |  |  |  |  |  |  |  |  |  |  |  |  |  |  |  |     |
|            | 339       |     |     |                           |        |            |       |        |          |          |        |          |            |    |            |       |        |          |          |        |          |        |    |            |       |        |       |        |                                |          |          |        |          |        |    |     | yes |     |  |  |  |  |  |  |  |  |  |  |  |  |  |  |  |  |  |  |  |  |  |  |  |  |  |  |  |  |  |  |     |     |     |     |     |     |    |    |    |  |  |  |  |  |  |  |  |  |  |  |  |  |  |  |  |  |  |  |  |  |  |  |  |  |  |  |     |     |     |     |     |     |     |    |    |  |  |  |  |  |  |  |  |  |  |  |  |  |  |  |  |  |  |  |  |  |  |  |  |  |     |     |     |     |    |     |     |     |     |    |    |    |  |  |  |  |  |  |  |  |  |  |  |  |  |  |  |  |  |  |  |  |  |  |  |  |  |     |     |     |     |     |     |    |    |     |     |  |  |  |  |  |  |  |  |  |  |  |  |  |  |  |  |  |  |  |  |  |  |  |     |     |     |     |    |     |     |     |     |     |     |     |    |    |    |  |  |  |  |  |  |  |  |  |  |  |  |  |  |  |  |  |  |  |  |  |  |     |     |     |     |     |    |     |     |     |     |    |     |     |  |  |  |  |  |  |  |  |  |  |  |  |  |  |  |  |  |  |  |  |  |     |     |     |    |     |     |     |     |     |    |    |     |     |     |   |    |    |  |  |  |  |  |  |  |  |  |  |  |  |  |  |  |  |  |  |  |     |     |     |     |     |     |     |     |    |     |     |     |     |    |    |     |  |  |  |  |  |  |  |  |  |  |  |  |  |  |  |  |  |  |     |     |     |    |     |     |     |     |     |    |    |    |  |  |  |     |     |   |    |   |  |  |  |  |  |  |  |  |  |  |  |  |  |  |  |  |     |     |     |     |     |     |     |     |    |  |  |  |  |     |     |     |     |    |     |    |  |  |  |  |  |  |  |  |  |  |  |  |  |  |     |     |   |    |     |     |     |     |     |     |    |    |    |     |     |     |   |    |     |     |     |    |   |  |  |  |  |  |  |  |  |  |  |  |  |     |     |     |     |     |     |     |     |     |     |     |   |    |   |  |  |     |  |     |     |     |   |     |    |  |  |  |  |  |  |  |  |  |  |  |     |     |     |    |     |     |     |     |     |     |     |     |    |  |  |  |  |     |     |     |     |     |     |     |    |   |  |  |  |  |  |  |  |  |  |  |     |     |     |     |     |     |     |     |     |     |     |     |    |    |    |  |  |  |  |  |     |     |     |   |     |    |  |  |  |  |  |  |  |  |     |     |   |     |     |     |     |     |     |     |     |     |     |  |  |  |  |  |  |     |  |     |     |     |     |     |     |    |    |  |  |  |  |  |  |  |     |     |     |     |     |     |     |     |     |     |     |     |    |    |    |  |  |  |  |  |  |  |  |     |     |     |   |     |   |  |  |  |  |  |     |  |  |     |     |     |     |     |     |     |     |    |     |  |  |  |  |  |  |  |  |  |  |     |     |     |     |     |     |     |    |   |  |  |  |  |     |     |     |     |     |     |     |     |     |     |     |     |    |    |    |  |  |  |  |  |  |  |  |  |  |  |  |     |     |   |     |   |  |  |  |  |  |     |     |     |     |     |     |     |     |    |     |  |  |  |  |  |  |  |  |  |  |  |  |  |  |     |     |     |     |    |     |  |  |  |  |  |     |     |     |     |     |     |     |     |     |     |    |    |    |  |  |  |  |  |  |  |  |  |  |  |     |     |     |     |     |     |    |    |   |  |     |     |     |     |     |     |     |     |     |    |     |  |  |  |  |  |  |  |  |  |  |  |  |  |  |  |  |  |  |     |     |   |     |     |  |  |  |     |     |     |     |     |     |     |     |     |    |    |    |  |  |  |  |  |  |  |  |  |  |  |  |  |  |  |     |     |     |     |     |   |    |     |     |     |     |     |     |     |     |    |     |  |  |  |  |  |  |  |  |  |  |  |  |  |  |  |  |  |  |  |     |     |     |     |    |    |     |     |     |     |     |     |     |     |     |     |    |    |   |  |  |  |  |  |  |  |  |  |  |  |  |  |  |  |  |  |  |     |     |   |     |     |     |    |     |     |     |     |     |     |     |  |  |  |  |  |  |  |  |  |  |  |  |  |  |  |  |  |  |  |  |  |  |  |     |     |     |     |     |     |     |     |     |     |     |     |    |    |   |  |  |  |  |  |  |  |  |  |  |  |  |  |  |  |  |  |  |  |  |     |     |     |     |     |     |   |     |     |     |     |     |  |  |  |  |  |  |  |  |  |  |  |  |  |  |  |  |  |  |  |  |  |  |  |  |  |  |     |     |     |    |     |     |     |     |     |    |    |    |  |  |  |  |  |  |  |  |  |  |  |  |  |  |  |  |  |  |  |  |  |  |     |     |   |    |   |     |     |     |     |     |  |  |  |  |  |  |  |  |  |  |  |  |  |  |  |  |  |  |  |  |  |  |  |  |  |  |     |  |  |     |     |     |     |     |     |    |    |    |  |  |  |  |  |  |  |  |  |  |  |  |  |  |  |  |  |  |  |  |  |  |     |     |   |    |     |     |   |     |     |     |     |     |   |    |   |  |  |  |  |  |  |  |  |  |  |  |  |  |  |  |  |  |  |  |  |  |     |  |  |  |     |  |     |     |     |    |     |    |  |  |  |  |  |  |  |  |  |  |  |  |  |  |  |  |  |  |  |  |  |  |     |     |   |    |   |  |  |     |     |     |     |     |     |    |    |    |  |  |  |  |  |  |  |  |  |  |  |  |  |  |  |  |  |  |  |  |     |  |  |  |  |  |     |     |     |   |     |     |  |  |  |  |  |  |  |  |  |  |  |  |  |  |  |  |  |  |  |  |  |  |     |     |   |    |    |  |  |  |  |     |     |     |     |    |     |     |   |    |    |  |  |  |  |  |  |  |  |  |  |  |  |  |  |  |  |  |     |  |  |  |  |  |  |     |  |     |     |     |     |     |     |   |    |    |  |  |  |  |  |  |  |  |  |  |  |  |  |  |  |  |     |     |   |    |   |  |  |  |     |     |     |     |     |    |     |     |  |     |     |   |    |   |  |  |  |  |  |  |  |  |  |  |  |  |  |  |     |  |  |  |  |  |  |  |  |  |     |     |     |     |     |   |    |     |   |    |    |  |  |  |  |  |  |  |  |  |  |  |  |  |     |  |  |  |  |  |  |  |  |     |  |     |     |   |    |     |  |     |     |  |  |  |  |  |  |  |  |  |  |  |  |  |  |  |  |     |     |   |    |    |  |  |  |  |  |     |     |     |   |     |     |   |    |    |  |     |     |   |    |    |  |  |  |  |  |  |  |  |  |  |  |     |  |  |  |  |  |  |  |  |     |  |  |  |  |     |  |  |  |  |  |     |  |  |  |  |  |  |  |  |  |  |  |  |  |     |  |  |  |  |  |  |  |  |  |  |  |  |  |     |     |   |    |    |  |     |  |  |     |     |   |    |    |  |  |  |  |  |  |     |     |     |   |    |    |  |  |  |  |  |  |  |  |  |  |     |  |     |     |   |    |   |     |     |     |   |    |    |  |  |  |  |  |  |  |  |     |  |  |  |  |  |  |  |  |  |  |  |     |     |     |   |    |     |  |  |  |     |  |     |  |  |  |  |  |  |  |  |  |  |     |     |   |    |    |  |  |  |  |  |  |  |  |  |  |     |  |     |     |   |    |    |  |  |  |  |     |     |   |    |    |  |  |  |  |  |     |  |  |  |  |  |  |  |  |  |  |  |  |     |  |  |  |     |  |  |  |  |  |  |  |  |     |  |  |  |  |  |  |  |     |     |   |    |   |  |  |  |  |  |  |  |  |  |     |     |     |     |     |   |    |    |  |  |  |     |  |  |  |     |     |   |    |   |  |  |     |  |  |  |  |  |  |  |  |  |  |  |  |  |  |  |  |     |  |  |  |  |  |  |  |  |  |  |  |     |  |  |  |  |     |  |  |  |  |  |  |  |  |  |  |  |  |  |  |  |     |     |     |   |    |    |  |  |  |  |  |  |  |     |  |  |  |  |  |     |     |   |    |   |  |  |  |  |  |  |  |  |  |  |  |  |  |     |  |  |  |  |  |  |  |  |  |  |  |  |  |     |     |   |    |     |  |  |  |  |  |  |  |  |  |  |  |  |  |  |     |  |  |  |  |  |  |  |  |  |  |  |  |  |  |  |  |     |  |     |     |   |    |    |  |  |  |  |  |  |  |  |  |  |  |  |  |  |  |  |  |  |  |  |  |  |  |  |  |  |  |  |  |  |     |     |   |    |    |  |  |  |  |  |  |  |  |  |  |  |  |  |  |  |  |  |  |  |  |  |  |  |  |  |  |  |  |  |     |
| 049        | 031       | M   | 82  | 10                        |        |            |       |        |          |          |        |          |            |    |            |       |        |          |          |        |          |        |    |            |       |        |       |        |                                |          |          |        |          |        |    | 106 |     |     |  |  |  |  |  |  |  |  |  |  |  |  |  |  |  |  |  |  |  |  |  |  |  |  |  |  |  |  |  |  |     | yes | 051 | 306 | F   | 60  | 8  |    |    |  |  |  |  |  |  |  |  |  |  |  |  |  |  |  |  |  |  |  |  |  |  |  |  |  |  |  |     |     | 354 |     |     |     |     |    |    |  |  |  |  |  |  |  |  |  |  |  |  |  |  |  |  |  |  |  |  |  |  |  |  |  |     |     | 052 | 041 | F  | 80  | 18  |     |     |    |    |    |  |  |  |  |  |  |  |  |  |  |  |  |  |  |  |  |  |  |  |  |  |  |  |  |  |     | 075 |     |     |     |     |    |    |     |     |  |  |  |  |  |  |  |  |  |  |  |  |  |  |  |  |  |  |  |  |  |  |  |     | yes | 056 | 030 | F  | 79  | 10  |     |     |     |     |     |    |    |    |  |  |  |  |  |  |  |  |  |  |  |  |  |  |  |  |  |  |  |  |  |  |     | 076 |     |     |     |    |     |     |     |     |    |     |     |  |  |  |  |  |  |  |  |  |  |  |  |  |  |  |  |  |  |  |  |  |     |     | 297 |    |     |     |     |     |     |    |    |     |     |     |   |    |    |  |  |  |  |  |  |  |  |  |  |  |  |  |  |  |  |  |  |  |     |     |     | yes | 060 | 257 | F   | 53  | 14 |     |     |     |     |    |    |     |  |  |  |  |  |  |  |  |  |  |  |  |  |  |  |  |  |  |     |     |     |    |     |     | 323 |     |     |    |    |    |  |  |  |     |     |   |    |   |  |  |  |  |  |  |  |  |  |  |  |  |  |  |  |  |     |     |     |     | 061 | 104 | F   | 79  | 13 |  |  |  |  |     |     |     |     |    |     |    |  |  |  |  |  |  |  |  |  |  |  |  |  |  |     |     |   |    |     |     | 312 |     |     |     |    |    |    |     |     |     |   |    |     |     |     |    |   |  |  |  |  |  |  |  |  |  |  |  |  |     |     |     |     |     | 064 | 044 | F   | 75  | 23  |     |   |    |   |  |  |     |  |     |     |     |   |     |    |  |  |  |  |  |  |  |  |  |  |  |     |     |     |    |     |     | 102 |     |     |     |     |     |    |  |  |  |  |     |     |     |     |     |     |     |    |   |  |  |  |  |  |  |  |  |  |  |     |     |     | yes | 065 | 259 | F   | 43  | 9   |     |     |     |    |    |    |  |  |  |  |  |     |     |     |   |     |    |  |  |  |  |  |  |  |  |     |     |   |     |     |     | 322 |     |     |     |     |     |     |  |  |  |  |  |  |     |  |     |     |     |     |     |     |    |    |  |  |  |  |  |  |  |     |     |     |     | 070 | 063 | F   | 48  | 4   |     |     |     |    |    |    |  |  |  |  |  |  |  |  |     |     |     |   |     |   |  |  |  |  |  |     |  |  |     |     |     | 286 |     |     |     |     |    |     |  |  |  |  |  |  |  |  |  |  |     |     |     |     |     |     |     |    |   |  |  |  |  |     |     |     |     | 072 | 025 | F   | 80  | 7   |     |     |     |    |    |    |  |  |  |  |  |  |  |  |  |  |  |  |     |     |   |     |   |  |  |  |  |  |     |     |     | 342 |     |     |     |     |    |     |  |  |  |  |  |  |  |  |  |  |  |  |  |  |     |     |     |     |    |     |  |  |  |  |  |     |     | 076 | 038 | F   | 52  | 7   |     |     |     |    |    |    |  |  |  |  |  |  |  |  |  |  |  |     |     |     |     |     |     |    |    |   |  |     |     |     |     | 098 |     |     |     |     |    |     |  |  |  |  |  |  |  |  |  |  |  |  |  |  |  |  |  |  |     |     |   |     |     |  |  |  |     | 078 | 262 | F   | 85  | 14  |     |     |     |    |    |    |  |  |  |  |  |  |  |  |  |  |  |  |  |  |  |     |     |     |     |     |   |    |     |     |     | 291 |     |     |     |     |    |     |  |  |  |  |  |  |  |  |  |  |  |  |  |  |  |  |  |  |  |     |     |     |     |    |    |     |     | 079 | 314 | F   | 88  | 8   |     |     |     |    |    |   |  |  |  |  |  |  |  |  |  |  |  |  |  |  |  |  |  |  |     |     |   |     |     |     |    | 335 |     |     |     |     |     |     |  |  |  |  |  |  |  |  |  |  |  |  |  |  |  |  |  |  |  |  |  |  |  |     |     |     |     | 468 |     |     |     |     |     |     |     |    |    |   |  |  |  |  |  |  |  |  |  |  |  |  |  |  |  |  |  |  |  |  |     |     |     |     |     | 080 |   | 054 |     | F   | 71  | 10  |  |  |  |  |  |  |  |  |  |  |  |  |  |  |  |  |  |  |  |  |  |  |  |  |  |  |     |     |     |    |     | 089 |     |     |     |    |    |    |  |  |  |  |  |  |  |  |  |  |  |  |  |  |  |  |  |  |  |  |  |  |     |     |   |    |   | 131 |     |     |     |     |  |  |  |  |  |  |  |  |  |  |  |  |  |  |  |  |  |  |  |  |  |  |  |  |  |  |     |  |  | yes |     | 083 | 020 |     |     | M  | 67 | 18 |  |  |  |  |  |  |  |  |  |  |  |  |  |  |  |  |  |  |  |  |  |  |     |     |   |    |     |     |   |     |     | 088 |     |     |   |    |   |  |  |  |  |  |  |  |  |  |  |  |  |  |  |  |  |  |  |  |  |  |     |  |  |  |     |  |     | 084 | 012 | M  | 45  | 23 |  |  |  |  |  |  |  |  |  |  |  |  |  |  |  |  |  |  |  |  |  |  |     |     |   |    |   |  |  |     |     | 021 |     |     |     |    |    |    |  |  |  |  |  |  |  |  |  |  |  |  |  |  |  |  |  |  |  |  |     |  |  |  |  |  |     | 142 | 399 | M | 73  | 7   |  |  |  |  |  |  |  |  |  |  |  |  |  |  |  |  |  |  |  |  |  |  |     |     |   |    |    |  |  |  |  | 427 |     |     |     |    |     |     |   |    |    |  |  |  |  |  |  |  |  |  |  |  |  |  |  |  |  |  |     |  |  |  |  |  |  | 505 |  |     |     |     |     |     |     |   |    |    |  |  |  |  |  |  |  |  |  |  |  |  |  |  |  |  |     |     |   |    |   |  |  |  | 153 | 444 | F   | 85  | 9   |    |     |     |  |     |     |   |    |   |  |  |  |  |  |  |  |  |  |  |  |  |  |  |     |  |  |  |  |  |  |  |  |  |     | 511 |     |     |     |   |    |     |   |    |    |  |  |  |  |  |  |  |  |  |  |  |  |  |     |  |  |  |  |  |  |  |  |     |  | 163 | 361 | F | 47 | 23  |  |     |     |  |  |  |  |  |  |  |  |  |  |  |  |  |  |  |  |     |     |   |    |    |  |  |  |  |  |     |     | 424 |   |     |     |   |    |    |  |     |     |   |    |    |  |  |  |  |  |  |  |  |  |  |  |     |  |  |  |  |  |  |  |  | yes |  |  |  |  |     |  |  |  |  |  |     |  |  |  |  |  |  |  |  |  |  |  |  |  |     |  |  |  |  |  |  |  |  |  |  |  |  |  |     |     |   |    |    |  |     |  |  |     |     |   |    |    |  |  |  |  |  |  |     |     |     |   |    |    |  |  |  |  |  |  |  |  |  |  |     |  |     |     |   |    |   |     |     |     |   |    |    |  |  |  |  |  |  |  |  |     |  |  |  |  |  |  |  |  |  |  |  |     |     |     |   |    |     |  |  |  |     |  |     |  |  |  |  |  |  |  |  |  |  |     |     |   |    |    |  |  |  |  |  |  |  |  |  |  |     |  |     |     |   |    |    |  |  |  |  |     |     |   |    |    |  |  |  |  |  |     |  |  |  |  |  |  |  |  |  |  |  |  |     |  |  |  |     |  |  |  |  |  |  |  |  |     |  |  |  |  |  |  |  |     |     |   |    |   |  |  |  |  |  |  |  |  |  |     |     |     |     |     |   |    |    |  |  |  |     |  |  |  |     |     |   |    |   |  |  |     |  |  |  |  |  |  |  |  |  |  |  |  |  |  |  |  |     |  |  |  |  |  |  |  |  |  |  |  |     |  |  |  |  |     |  |  |  |  |  |  |  |  |  |  |  |  |  |  |  |     |     |     |   |    |    |  |  |  |  |  |  |  |     |  |  |  |  |  |     |     |   |    |   |  |  |  |  |  |  |  |  |  |  |  |  |  |     |  |  |  |  |  |  |  |  |  |  |  |  |  |     |     |   |    |     |  |  |  |  |  |  |  |  |  |  |  |  |  |  |     |  |  |  |  |  |  |  |  |  |  |  |  |  |  |  |  |     |  |     |     |   |    |    |  |  |  |  |  |  |  |  |  |  |  |  |  |  |  |  |  |  |  |  |  |  |  |  |  |  |  |  |  |  |     |     |   |    |    |  |  |  |  |  |  |  |  |  |  |  |  |  |  |  |  |  |  |  |  |  |  |  |  |  |  |  |  |  |     |
|            | 106       |     |     |                           |        |            |       |        |          |          |        |          |            |    |            |       |        |          |          |        |          |        |    |            |       |        |       |        |                                |          |          |        |          |        |    |     | yes |     |  |  |  |  |  |  |  |  |  |  |  |  |  |  |  |  |  |  |  |  |  |  |  |  |  |  |  |  |  |  |     |     |     |     |     |     |    |    |    |  |  |  |  |  |  |  |  |  |  |  |  |  |  |  |  |  |  |  |  |  |  |  |  |  |  |  |     |     |     |     |     |     |     |    |    |  |  |  |  |  |  |  |  |  |  |  |  |  |  |  |  |  |  |  |  |  |  |  |  |  |     |     |     |     |    |     |     |     |     |    |    |    |  |  |  |  |  |  |  |  |  |  |  |  |  |  |  |  |  |  |  |  |  |  |  |  |  |     |     |     |     |     |     |    |    |     |     |  |  |  |  |  |  |  |  |  |  |  |  |  |  |  |  |  |  |  |  |  |  |  |     |     |     |     |    |     |     |     |     |     |     |     |    |    |    |  |  |  |  |  |  |  |  |  |  |  |  |  |  |  |  |  |  |  |  |  |  |     |     |     |     |     |    |     |     |     |     |    |     |     |  |  |  |  |  |  |  |  |  |  |  |  |  |  |  |  |  |  |  |  |  |     |     |     |    |     |     |     |     |     |    |    |     |     |     |   |    |    |  |  |  |  |  |  |  |  |  |  |  |  |  |  |  |  |  |  |  |     |     |     |     |     |     |     |     |    |     |     |     |     |    |    |     |  |  |  |  |  |  |  |  |  |  |  |  |  |  |  |  |  |  |     |     |     |    |     |     |     |     |     |    |    |    |  |  |  |     |     |   |    |   |  |  |  |  |  |  |  |  |  |  |  |  |  |  |  |  |     |     |     |     |     |     |     |     |    |  |  |  |  |     |     |     |     |    |     |    |  |  |  |  |  |  |  |  |  |  |  |  |  |  |     |     |   |    |     |     |     |     |     |     |    |    |    |     |     |     |   |    |     |     |     |    |   |  |  |  |  |  |  |  |  |  |  |  |  |     |     |     |     |     |     |     |     |     |     |     |   |    |   |  |  |     |  |     |     |     |   |     |    |  |  |  |  |  |  |  |  |  |  |  |     |     |     |    |     |     |     |     |     |     |     |     |    |  |  |  |  |     |     |     |     |     |     |     |    |   |  |  |  |  |  |  |  |  |  |  |     |     |     |     |     |     |     |     |     |     |     |     |    |    |    |  |  |  |  |  |     |     |     |   |     |    |  |  |  |  |  |  |  |  |     |     |   |     |     |     |     |     |     |     |     |     |     |  |  |  |  |  |  |     |  |     |     |     |     |     |     |    |    |  |  |  |  |  |  |  |     |     |     |     |     |     |     |     |     |     |     |     |    |    |    |  |  |  |  |  |  |  |  |     |     |     |   |     |   |  |  |  |  |  |     |  |  |     |     |     |     |     |     |     |     |    |     |  |  |  |  |  |  |  |  |  |  |     |     |     |     |     |     |     |    |   |  |  |  |  |     |     |     |     |     |     |     |     |     |     |     |     |    |    |    |  |  |  |  |  |  |  |  |  |  |  |  |     |     |   |     |   |  |  |  |  |  |     |     |     |     |     |     |     |     |    |     |  |  |  |  |  |  |  |  |  |  |  |  |  |  |     |     |     |     |    |     |  |  |  |  |  |     |     |     |     |     |     |     |     |     |     |    |    |    |  |  |  |  |  |  |  |  |  |  |  |     |     |     |     |     |     |    |    |   |  |     |     |     |     |     |     |     |     |     |    |     |  |  |  |  |  |  |  |  |  |  |  |  |  |  |  |  |  |  |     |     |   |     |     |  |  |  |     |     |     |     |     |     |     |     |     |    |    |    |  |  |  |  |  |  |  |  |  |  |  |  |  |  |  |     |     |     |     |     |   |    |     |     |     |     |     |     |     |     |    |     |  |  |  |  |  |  |  |  |  |  |  |  |  |  |  |  |  |  |  |     |     |     |     |    |    |     |     |     |     |     |     |     |     |     |     |    |    |   |  |  |  |  |  |  |  |  |  |  |  |  |  |  |  |  |  |  |     |     |   |     |     |     |    |     |     |     |     |     |     |     |  |  |  |  |  |  |  |  |  |  |  |  |  |  |  |  |  |  |  |  |  |  |  |     |     |     |     |     |     |     |     |     |     |     |     |    |    |   |  |  |  |  |  |  |  |  |  |  |  |  |  |  |  |  |  |  |  |  |     |     |     |     |     |     |   |     |     |     |     |     |  |  |  |  |  |  |  |  |  |  |  |  |  |  |  |  |  |  |  |  |  |  |  |  |  |  |     |     |     |    |     |     |     |     |     |    |    |    |  |  |  |  |  |  |  |  |  |  |  |  |  |  |  |  |  |  |  |  |  |  |     |     |   |    |   |     |     |     |     |     |  |  |  |  |  |  |  |  |  |  |  |  |  |  |  |  |  |  |  |  |  |  |  |  |  |  |     |  |  |     |     |     |     |     |     |    |    |    |  |  |  |  |  |  |  |  |  |  |  |  |  |  |  |  |  |  |  |  |  |  |     |     |   |    |     |     |   |     |     |     |     |     |   |    |   |  |  |  |  |  |  |  |  |  |  |  |  |  |  |  |  |  |  |  |  |  |     |  |  |  |     |  |     |     |     |    |     |    |  |  |  |  |  |  |  |  |  |  |  |  |  |  |  |  |  |  |  |  |  |  |     |     |   |    |   |  |  |     |     |     |     |     |     |    |    |    |  |  |  |  |  |  |  |  |  |  |  |  |  |  |  |  |  |  |  |  |     |  |  |  |  |  |     |     |     |   |     |     |  |  |  |  |  |  |  |  |  |  |  |  |  |  |  |  |  |  |  |  |  |  |     |     |   |    |    |  |  |  |  |     |     |     |     |    |     |     |   |    |    |  |  |  |  |  |  |  |  |  |  |  |  |  |  |  |  |  |     |  |  |  |  |  |  |     |  |     |     |     |     |     |     |   |    |    |  |  |  |  |  |  |  |  |  |  |  |  |  |  |  |  |     |     |   |    |   |  |  |  |     |     |     |     |     |    |     |     |  |     |     |   |    |   |  |  |  |  |  |  |  |  |  |  |  |  |  |  |     |  |  |  |  |  |  |  |  |  |     |     |     |     |     |   |    |     |   |    |    |  |  |  |  |  |  |  |  |  |  |  |  |  |     |  |  |  |  |  |  |  |  |     |  |     |     |   |    |     |  |     |     |  |  |  |  |  |  |  |  |  |  |  |  |  |  |  |  |     |     |   |    |    |  |  |  |  |  |     |     |     |   |     |     |   |    |    |  |     |     |   |    |    |  |  |  |  |  |  |  |  |  |  |  |     |  |  |  |  |  |  |  |  |     |  |  |  |  |     |  |  |  |  |  |     |  |  |  |  |  |  |  |  |  |  |  |  |  |     |  |  |  |  |  |  |  |  |  |  |  |  |  |     |     |   |    |    |  |     |  |  |     |     |   |    |    |  |  |  |  |  |  |     |     |     |   |    |    |  |  |  |  |  |  |  |  |  |  |     |  |     |     |   |    |   |     |     |     |   |    |    |  |  |  |  |  |  |  |  |     |  |  |  |  |  |  |  |  |  |  |  |     |     |     |   |    |     |  |  |  |     |  |     |  |  |  |  |  |  |  |  |  |  |     |     |   |    |    |  |  |  |  |  |  |  |  |  |  |     |  |     |     |   |    |    |  |  |  |  |     |     |   |    |    |  |  |  |  |  |     |  |  |  |  |  |  |  |  |  |  |  |  |     |  |  |  |     |  |  |  |  |  |  |  |  |     |  |  |  |  |  |  |  |     |     |   |    |   |  |  |  |  |  |  |  |  |  |     |     |     |     |     |   |    |    |  |  |  |     |  |  |  |     |     |   |    |   |  |  |     |  |  |  |  |  |  |  |  |  |  |  |  |  |  |  |  |     |  |  |  |  |  |  |  |  |  |  |  |     |  |  |  |  |     |  |  |  |  |  |  |  |  |  |  |  |  |  |  |  |     |     |     |   |    |    |  |  |  |  |  |  |  |     |  |  |  |  |  |     |     |   |    |   |  |  |  |  |  |  |  |  |  |  |  |  |  |     |  |  |  |  |  |  |  |  |  |  |  |  |  |     |     |   |    |     |  |  |  |  |  |  |  |  |  |  |  |  |  |  |     |  |  |  |  |  |  |  |  |  |  |  |  |  |  |  |  |     |  |     |     |   |    |    |  |  |  |  |  |  |  |  |  |  |  |  |  |  |  |  |  |  |  |  |  |  |  |  |  |  |  |  |  |  |     |     |   |    |    |  |  |  |  |  |  |  |  |  |  |  |  |  |  |  |  |  |  |  |  |  |  |  |  |  |  |  |  |  |     |
| 051        | 306       | F   | 60  | 8                         |        |            |       |        |          |          |        |          |            |    |            |       |        |          |          |        |          |        |    |            |       |        |       |        |                                |          |          |        |          |        |    | 354 |     |     |  |  |  |  |  |  |  |  |  |  |  |  |  |  |  |  |  |  |  |  |  |  |  |  |  |  |  |  |  |  |     | 052 | 041 | F   | 80  | 18  |    |    |    |  |  |  |  |  |  |  |  |  |  |  |  |  |  |  |  |  |  |  |  |  |  |  |  |  |  |  |     | 075 |     |     |     |     |     |    |    |  |  |  |  |  |  |  |  |  |  |  |  |  |  |  |  |  |  |  |  |  |  |  |  |  | yes | 056 | 030 | F   | 79 | 10  |     |     |     |    |    |    |  |  |  |  |  |  |  |  |  |  |  |  |  |  |  |  |  |  |  |  |  |  |  |  |  | 076 |     |     |     |     |     |    |    |     |     |  |  |  |  |  |  |  |  |  |  |  |  |  |  |  |  |  |  |  |  |  |  |  |     |     |     | 297 |    |     |     |     |     |     |     |     |    |    |    |  |  |  |  |  |  |  |  |  |  |  |  |  |  |  |  |  |  |  |  |  |  |     |     | yes | 060 | 257 | F  | 53  | 14  |     |     |    |     |     |  |  |  |  |  |  |  |  |  |  |  |  |  |  |  |  |  |  |  |  |  |     |     |     |    |     | 323 |     |     |     |    |    |     |     |     |   |    |    |  |  |  |  |  |  |  |  |  |  |  |  |  |  |  |  |  |  |  |     |     |     | 061 | 104 | F   | 79  | 13  |    |     |     |     |     |    |    |     |  |  |  |  |  |  |  |  |  |  |  |  |  |  |  |  |  |  |     |     |     |    |     | 312 |     |     |     |    |    |    |  |  |  |     |     |   |    |   |  |  |  |  |  |  |  |  |  |  |  |  |  |  |  |  |     |     |     | 064 | 044 | F   | 75  | 23  |    |  |  |  |  |     |     |     |     |    |     |    |  |  |  |  |  |  |  |  |  |  |  |  |  |  |     |     |   |    |     | 102 |     |     |     |     |    |    |    |     |     |     |   |    |     |     |     |    |   |  |  |  |  |  |  |  |  |  |  |  |  |     |     |     | yes | 065 | 259 | F   | 43  | 9   |     |     |   |    |   |  |  |     |  |     |     |     |   |     |    |  |  |  |  |  |  |  |  |  |  |  |     |     |     |    |     | 322 |     |     |     |     |     |     |    |  |  |  |  |     |     |     |     |     |     |     |    |   |  |  |  |  |  |  |  |  |  |  |     |     |     | 070 | 063 | F   | 48  | 4   |     |     |     |     |    |    |    |  |  |  |  |  |     |     |     |   |     |    |  |  |  |  |  |  |  |  |     |     |   |     |     | 286 |     |     |     |     |     |     |     |  |  |  |  |  |  |     |  |     |     |     |     |     |     |    |    |  |  |  |  |  |  |  |     |     |     | 072 | 025 | F   | 80  | 7   |     |     |     |     |    |    |    |  |  |  |  |  |  |  |  |     |     |     |   |     |   |  |  |  |  |  |     |  |  |     |     | 342 |     |     |     |     |     |    |     |  |  |  |  |  |  |  |  |  |  |     |     |     |     |     |     |     |    |   |  |  |  |  |     |     |     | 076 | 038 | F   | 52  | 7   |     |     |     |     |    |    |    |  |  |  |  |  |  |  |  |  |  |  |  |     |     |   |     |   |  |  |  |  |  |     |     | 098 |     |     |     |     |     |    |     |  |  |  |  |  |  |  |  |  |  |  |  |  |  |     |     |     |     |    |     |  |  |  |  |  |     | 078 | 262 | F   | 85  | 14  |     |     |     |     |    |    |    |  |  |  |  |  |  |  |  |  |  |  |     |     |     |     |     |     |    |    |   |  |     |     |     | 291 |     |     |     |     |     |    |     |  |  |  |  |  |  |  |  |  |  |  |  |  |  |  |  |  |  |     |     |   |     |     |  |  |  | 079 | 314 | F   | 88  | 8   |     |     |     |     |    |    |    |  |  |  |  |  |  |  |  |  |  |  |  |  |  |  |     |     |     |     |     |   |    |     |     | 335 |     |     |     |     |     |    |     |  |  |  |  |  |  |  |  |  |  |  |  |  |  |  |  |  |  |  |     |     |     |     |    |    |     | 468 |     |     |     |     |     |     |     |     |    |    |   |  |  |  |  |  |  |  |  |  |  |  |  |  |  |  |  |  |  |     |     |   |     |     |     |    |     | 080 | 054 | F   | 71  | 10  |     |  |  |  |  |  |  |  |  |  |  |  |  |  |  |  |  |  |  |  |  |  |  |  |     |     |     |     |     |     |     | 089 |     |     |     |     |    |    |   |  |  |  |  |  |  |  |  |  |  |  |  |  |  |  |  |  |  |  |  |     |     |     |     |     |     |   | 131 |     |     |     |     |  |  |  |  |  |  |  |  |  |  |  |  |  |  |  |  |  |  |  |  |  |  |  |  |  |  |     |     |     |    |     | yes | 083 | 020 | M   | 67 | 18 |    |  |  |  |  |  |  |  |  |  |  |  |  |  |  |  |  |  |  |  |  |  |  |     |     |   |    |   |     |     |     | 088 |     |  |  |  |  |  |  |  |  |  |  |  |  |  |  |  |  |  |  |  |  |  |  |  |  |  |  |     |  |  |     |     |     | 084 | 012 | M   | 45 | 23 |    |  |  |  |  |  |  |  |  |  |  |  |  |  |  |  |  |  |  |  |  |  |  |     |     |   |    |     |     |   |     | 021 |     |     |     |   |    |   |  |  |  |  |  |  |  |  |  |  |  |  |  |  |  |  |  |  |  |  |  |     |  |  |  |     |  | 142 | 399 | M   | 73 | 7   |    |  |  |  |  |  |  |  |  |  |  |  |  |  |  |  |  |  |  |  |  |  |  |     |     |   |    |   |  |  |     | 427 |     |     |     |     |    |    |    |  |  |  |  |  |  |  |  |  |  |  |  |  |  |  |  |  |  |  |  |     |  |  |  |  |  | 505 |     |     |   |     |     |  |  |  |  |  |  |  |  |  |  |  |  |  |  |  |  |  |  |  |  |  |  |     |     |   |    |    |  |  |  |  |     | 153 | 444 | F   | 85 | 9   |     |   |    |    |  |  |  |  |  |  |  |  |  |  |  |  |  |  |  |  |  |     |  |  |  |  |  |  |     |  |     | 511 |     |     |     |     |   |    |    |  |  |  |  |  |  |  |  |  |  |  |  |  |  |  |  |     |     |   |    |   |  |  |  |     |     | 163 | 361 | F   | 47 | 23  |     |  |     |     |   |    |   |  |  |  |  |  |  |  |  |  |  |  |  |  |  |     |  |  |  |  |  |  |  |  |  | 424 |     |     |     |     |   |    |     |   |    |    |  |  |  |  |  |  |  |  |  |  |  |  |  |     |  |  |  |  |  |  |  |  | yes |  |     |     |   |    |     |  |     |     |  |  |  |  |  |  |  |  |  |  |  |  |  |  |  |  |     |     |   |    |    |  |  |  |  |  |     |     |     |   |     |     |   |    |    |  |     |     |   |    |    |  |  |  |  |  |  |  |  |  |  |  |     |  |  |  |  |  |  |  |  |     |  |  |  |  |     |  |  |  |  |  |     |  |  |  |  |  |  |  |  |  |  |  |  |  |     |  |  |  |  |  |  |  |  |  |  |  |  |  |     |     |   |    |    |  |     |  |  |     |     |   |    |    |  |  |  |  |  |  |     |     |     |   |    |    |  |  |  |  |  |  |  |  |  |  |     |  |     |     |   |    |   |     |     |     |   |    |    |  |  |  |  |  |  |  |  |     |  |  |  |  |  |  |  |  |  |  |  |     |     |     |   |    |     |  |  |  |     |  |     |  |  |  |  |  |  |  |  |  |  |     |     |   |    |    |  |  |  |  |  |  |  |  |  |  |     |  |     |     |   |    |    |  |  |  |  |     |     |   |    |    |  |  |  |  |  |     |  |  |  |  |  |  |  |  |  |  |  |  |     |  |  |  |     |  |  |  |  |  |  |  |  |     |  |  |  |  |  |  |  |     |     |   |    |   |  |  |  |  |  |  |  |  |  |     |     |     |     |     |   |    |    |  |  |  |     |  |  |  |     |     |   |    |   |  |  |     |  |  |  |  |  |  |  |  |  |  |  |  |  |  |  |  |     |  |  |  |  |  |  |  |  |  |  |  |     |  |  |  |  |     |  |  |  |  |  |  |  |  |  |  |  |  |  |  |  |     |     |     |   |    |    |  |  |  |  |  |  |  |     |  |  |  |  |  |     |     |   |    |   |  |  |  |  |  |  |  |  |  |  |  |  |  |     |  |  |  |  |  |  |  |  |  |  |  |  |  |     |     |   |    |     |  |  |  |  |  |  |  |  |  |  |  |  |  |  |     |  |  |  |  |  |  |  |  |  |  |  |  |  |  |  |  |     |  |     |     |   |    |    |  |  |  |  |  |  |  |  |  |  |  |  |  |  |  |  |  |  |  |  |  |  |  |  |  |  |  |  |  |  |     |     |   |    |    |  |  |  |  |  |  |  |  |  |  |  |  |  |  |  |  |  |  |  |  |  |  |  |  |  |  |  |  |  |     |
|            | 354       |     |     |                           |        |            |       |        |          |          |        |          |            |    |            |       |        |          |          |        |          |        |    |            |       |        |       |        |                                |          |          |        |          |        |    |     |     |     |  |  |  |  |  |  |  |  |  |  |  |  |  |  |  |  |  |  |  |  |  |  |  |  |  |  |  |  |  |  |     |     |     |     |     |     |    |    |    |  |  |  |  |  |  |  |  |  |  |  |  |  |  |  |  |  |  |  |  |  |  |  |  |  |  |  |     |     |     |     |     |     |     |    |    |  |  |  |  |  |  |  |  |  |  |  |  |  |  |  |  |  |  |  |  |  |  |  |  |  |     |     |     |     |    |     |     |     |     |    |    |    |  |  |  |  |  |  |  |  |  |  |  |  |  |  |  |  |  |  |  |  |  |  |  |  |  |     |     |     |     |     |     |    |    |     |     |  |  |  |  |  |  |  |  |  |  |  |  |  |  |  |  |  |  |  |  |  |  |  |     |     |     |     |    |     |     |     |     |     |     |     |    |    |    |  |  |  |  |  |  |  |  |  |  |  |  |  |  |  |  |  |  |  |  |  |  |     |     |     |     |     |    |     |     |     |     |    |     |     |  |  |  |  |  |  |  |  |  |  |  |  |  |  |  |  |  |  |  |  |  |     |     |     |    |     |     |     |     |     |    |    |     |     |     |   |    |    |  |  |  |  |  |  |  |  |  |  |  |  |  |  |  |  |  |  |  |     |     |     |     |     |     |     |     |    |     |     |     |     |    |    |     |  |  |  |  |  |  |  |  |  |  |  |  |  |  |  |  |  |  |     |     |     |    |     |     |     |     |     |    |    |    |  |  |  |     |     |   |    |   |  |  |  |  |  |  |  |  |  |  |  |  |  |  |  |  |     |     |     |     |     |     |     |     |    |  |  |  |  |     |     |     |     |    |     |    |  |  |  |  |  |  |  |  |  |  |  |  |  |  |     |     |   |    |     |     |     |     |     |     |    |    |    |     |     |     |   |    |     |     |     |    |   |  |  |  |  |  |  |  |  |  |  |  |  |     |     |     |     |     |     |     |     |     |     |     |   |    |   |  |  |     |  |     |     |     |   |     |    |  |  |  |  |  |  |  |  |  |  |  |     |     |     |    |     |     |     |     |     |     |     |     |    |  |  |  |  |     |     |     |     |     |     |     |    |   |  |  |  |  |  |  |  |  |  |  |     |     |     |     |     |     |     |     |     |     |     |     |    |    |    |  |  |  |  |  |     |     |     |   |     |    |  |  |  |  |  |  |  |  |     |     |   |     |     |     |     |     |     |     |     |     |     |  |  |  |  |  |  |     |  |     |     |     |     |     |     |    |    |  |  |  |  |  |  |  |     |     |     |     |     |     |     |     |     |     |     |     |    |    |    |  |  |  |  |  |  |  |  |     |     |     |   |     |   |  |  |  |  |  |     |  |  |     |     |     |     |     |     |     |     |    |     |  |  |  |  |  |  |  |  |  |  |     |     |     |     |     |     |     |    |   |  |  |  |  |     |     |     |     |     |     |     |     |     |     |     |     |    |    |    |  |  |  |  |  |  |  |  |  |  |  |  |     |     |   |     |   |  |  |  |  |  |     |     |     |     |     |     |     |     |    |     |  |  |  |  |  |  |  |  |  |  |  |  |  |  |     |     |     |     |    |     |  |  |  |  |  |     |     |     |     |     |     |     |     |     |     |    |    |    |  |  |  |  |  |  |  |  |  |  |  |     |     |     |     |     |     |    |    |   |  |     |     |     |     |     |     |     |     |     |    |     |  |  |  |  |  |  |  |  |  |  |  |  |  |  |  |  |  |  |     |     |   |     |     |  |  |  |     |     |     |     |     |     |     |     |     |    |    |    |  |  |  |  |  |  |  |  |  |  |  |  |  |  |  |     |     |     |     |     |   |    |     |     |     |     |     |     |     |     |    |     |  |  |  |  |  |  |  |  |  |  |  |  |  |  |  |  |  |  |  |     |     |     |     |    |    |     |     |     |     |     |     |     |     |     |     |    |    |   |  |  |  |  |  |  |  |  |  |  |  |  |  |  |  |  |  |  |     |     |   |     |     |     |    |     |     |     |     |     |     |     |  |  |  |  |  |  |  |  |  |  |  |  |  |  |  |  |  |  |  |  |  |  |  |     |     |     |     |     |     |     |     |     |     |     |     |    |    |   |  |  |  |  |  |  |  |  |  |  |  |  |  |  |  |  |  |  |  |  |     |     |     |     |     |     |   |     |     |     |     |     |  |  |  |  |  |  |  |  |  |  |  |  |  |  |  |  |  |  |  |  |  |  |  |  |  |  |     |     |     |    |     |     |     |     |     |    |    |    |  |  |  |  |  |  |  |  |  |  |  |  |  |  |  |  |  |  |  |  |  |  |     |     |   |    |   |     |     |     |     |     |  |  |  |  |  |  |  |  |  |  |  |  |  |  |  |  |  |  |  |  |  |  |  |  |  |  |     |  |  |     |     |     |     |     |     |    |    |    |  |  |  |  |  |  |  |  |  |  |  |  |  |  |  |  |  |  |  |  |  |  |     |     |   |    |     |     |   |     |     |     |     |     |   |    |   |  |  |  |  |  |  |  |  |  |  |  |  |  |  |  |  |  |  |  |  |  |     |  |  |  |     |  |     |     |     |    |     |    |  |  |  |  |  |  |  |  |  |  |  |  |  |  |  |  |  |  |  |  |  |  |     |     |   |    |   |  |  |     |     |     |     |     |     |    |    |    |  |  |  |  |  |  |  |  |  |  |  |  |  |  |  |  |  |  |  |  |     |  |  |  |  |  |     |     |     |   |     |     |  |  |  |  |  |  |  |  |  |  |  |  |  |  |  |  |  |  |  |  |  |  |     |     |   |    |    |  |  |  |  |     |     |     |     |    |     |     |   |    |    |  |  |  |  |  |  |  |  |  |  |  |  |  |  |  |  |  |     |  |  |  |  |  |  |     |  |     |     |     |     |     |     |   |    |    |  |  |  |  |  |  |  |  |  |  |  |  |  |  |  |  |     |     |   |    |   |  |  |  |     |     |     |     |     |    |     |     |  |     |     |   |    |   |  |  |  |  |  |  |  |  |  |  |  |  |  |  |     |  |  |  |  |  |  |  |  |  |     |     |     |     |     |   |    |     |   |    |    |  |  |  |  |  |  |  |  |  |  |  |  |  |     |  |  |  |  |  |  |  |  |     |  |     |     |   |    |     |  |     |     |  |  |  |  |  |  |  |  |  |  |  |  |  |  |  |  |     |     |   |    |    |  |  |  |  |  |     |     |     |   |     |     |   |    |    |  |     |     |   |    |    |  |  |  |  |  |  |  |  |  |  |  |     |  |  |  |  |  |  |  |  |     |  |  |  |  |     |  |  |  |  |  |     |  |  |  |  |  |  |  |  |  |  |  |  |  |     |  |  |  |  |  |  |  |  |  |  |  |  |  |     |     |   |    |    |  |     |  |  |     |     |   |    |    |  |  |  |  |  |  |     |     |     |   |    |    |  |  |  |  |  |  |  |  |  |  |     |  |     |     |   |    |   |     |     |     |   |    |    |  |  |  |  |  |  |  |  |     |  |  |  |  |  |  |  |  |  |  |  |     |     |     |   |    |     |  |  |  |     |  |     |  |  |  |  |  |  |  |  |  |  |     |     |   |    |    |  |  |  |  |  |  |  |  |  |  |     |  |     |     |   |    |    |  |  |  |  |     |     |   |    |    |  |  |  |  |  |     |  |  |  |  |  |  |  |  |  |  |  |  |     |  |  |  |     |  |  |  |  |  |  |  |  |     |  |  |  |  |  |  |  |     |     |   |    |   |  |  |  |  |  |  |  |  |  |     |     |     |     |     |   |    |    |  |  |  |     |  |  |  |     |     |   |    |   |  |  |     |  |  |  |  |  |  |  |  |  |  |  |  |  |  |  |  |     |  |  |  |  |  |  |  |  |  |  |  |     |  |  |  |  |     |  |  |  |  |  |  |  |  |  |  |  |  |  |  |  |     |     |     |   |    |    |  |  |  |  |  |  |  |     |  |  |  |  |  |     |     |   |    |   |  |  |  |  |  |  |  |  |  |  |  |  |  |     |  |  |  |  |  |  |  |  |  |  |  |  |  |     |     |   |    |     |  |  |  |  |  |  |  |  |  |  |  |  |  |  |     |  |  |  |  |  |  |  |  |  |  |  |  |  |  |  |  |     |  |     |     |   |    |    |  |  |  |  |  |  |  |  |  |  |  |  |  |  |  |  |  |  |  |  |  |  |  |  |  |  |  |  |  |  |     |     |   |    |    |  |  |  |  |  |  |  |  |  |  |  |  |  |  |  |  |  |  |  |  |  |  |  |  |  |  |  |  |  |     |
| 052        | 041       | F   | 80  | 18                        |        |            |       |        |          |          |        |          |            |    |            |       |        |          |          |        |          |        |    |            |       |        |       |        |                                |          |          |        |          |        |    | 075 |     |     |  |  |  |  |  |  |  |  |  |  |  |  |  |  |  |  |  |  |  |  |  |  |  |  |  |  |  |  |  |  | yes | 056 | 030 | F   | 79  | 10  |    |    |    |  |  |  |  |  |  |  |  |  |  |  |  |  |  |  |  |  |  |  |  |  |  |  |  |  |  |  |     | 076 |     |     |     |     |     |    |    |  |  |  |  |  |  |  |  |  |  |  |  |  |  |  |  |  |  |  |  |  |  |  |  |  |     |     |     |     |    | 297 |     |     |     |    |    |    |  |  |  |  |  |  |  |  |  |  |  |  |  |  |  |  |  |  |  |  |  |  |  |  |  |     |     | yes | 060 | 257 | F   | 53 | 14 |     |     |  |  |  |  |  |  |  |  |  |  |  |  |  |  |  |  |  |  |  |  |  |  |  |     |     |     |     |    |     | 323 |     |     |     |     |     |    |    |    |  |  |  |  |  |  |  |  |  |  |  |  |  |  |  |  |  |  |  |  |  |  |     |     |     | 061 | 104 | F  | 79  | 13  |     |     |    |     |     |  |  |  |  |  |  |  |  |  |  |  |  |  |  |  |  |  |  |  |  |  |     |     |     |    |     | 312 |     |     |     |    |    |     |     |     |   |    |    |  |  |  |  |  |  |  |  |  |  |  |  |  |  |  |  |  |  |  |     |     |     | 064 | 044 | F   | 75  | 23  |    |     |     |     |     |    |    |     |  |  |  |  |  |  |  |  |  |  |  |  |  |  |  |  |  |  |     |     |     |    |     | 102 |     |     |     |    |    |    |  |  |  |     |     |   |    |   |  |  |  |  |  |  |  |  |  |  |  |  |  |  |  |  |     |     | yes | 065 | 259 | F   | 43  | 9   |    |  |  |  |  |     |     |     |     |    |     |    |  |  |  |  |  |  |  |  |  |  |  |  |  |  |     |     |   |    |     | 322 |     |     |     |     |    |    |    |     |     |     |   |    |     |     |     |    |   |  |  |  |  |  |  |  |  |  |  |  |  |     |     |     |     | 070 | 063 | F   | 48  | 4   |     |     |   |    |   |  |  |     |  |     |     |     |   |     |    |  |  |  |  |  |  |  |  |  |  |  |     |     |     |    |     | 286 |     |     |     |     |     |     |    |  |  |  |  |     |     |     |     |     |     |     |    |   |  |  |  |  |  |  |  |  |  |  |     |     |     | 072 | 025 | F   | 80  | 7   |     |     |     |     |    |    |    |  |  |  |  |  |     |     |     |   |     |    |  |  |  |  |  |  |  |  |     |     |   |     |     | 342 |     |     |     |     |     |     |     |  |  |  |  |  |  |     |  |     |     |     |     |     |     |    |    |  |  |  |  |  |  |  |     |     |     | 076 | 038 | F   | 52  | 7   |     |     |     |     |    |    |    |  |  |  |  |  |  |  |  |     |     |     |   |     |   |  |  |  |  |  |     |  |  |     |     | 098 |     |     |     |     |     |    |     |  |  |  |  |  |  |  |  |  |  |     |     |     |     |     |     |     |    |   |  |  |  |  |     |     |     | 078 | 262 | F   | 85  | 14  |     |     |     |     |    |    |    |  |  |  |  |  |  |  |  |  |  |  |  |     |     |   |     |   |  |  |  |  |  |     |     | 291 |     |     |     |     |     |    |     |  |  |  |  |  |  |  |  |  |  |  |  |  |  |     |     |     |     |    |     |  |  |  |  |  |     | 079 | 314 | F   | 88  | 8   |     |     |     |     |    |    |    |  |  |  |  |  |  |  |  |  |  |  |     |     |     |     |     |     |    |    |   |  |     |     |     | 335 |     |     |     |     |     |    |     |  |  |  |  |  |  |  |  |  |  |  |  |  |  |  |  |  |  |     |     |   |     |     |  |  |  |     | 468 |     |     |     |     |     |     |     |    |    |    |  |  |  |  |  |  |  |  |  |  |  |  |  |  |  |     |     |     |     |     |   |    |     |     |     |     | 080 | 054 | F   | 71  | 10 |     |  |  |  |  |  |  |  |  |  |  |  |  |  |  |  |  |  |  |  |     |     |     |     |    |    |     |     |     |     |     | 089 |     |     |     |     |    |    |   |  |  |  |  |  |  |  |  |  |  |  |  |  |  |  |  |  |  |     |     |   |     |     |     |    |     |     | 131 |     |     |     |     |  |  |  |  |  |  |  |  |  |  |  |  |  |  |  |  |  |  |  |  |  |  |  |     |     |     |     |     |     |     |     | yes | 083 | 020 | M   | 67 | 18 |   |  |  |  |  |  |  |  |  |  |  |  |  |  |  |  |  |  |  |  |  |     |     |     |     |     |     |   |     |     |     | 088 |     |  |  |  |  |  |  |  |  |  |  |  |  |  |  |  |  |  |  |  |  |  |  |  |  |  |  |     |     |     |    |     |     | 084 | 012 | M   | 45 | 23 |    |  |  |  |  |  |  |  |  |  |  |  |  |  |  |  |  |  |  |  |  |  |  |     |     |   |    |   |     |     |     | 021 |     |  |  |  |  |  |  |  |  |  |  |  |  |  |  |  |  |  |  |  |  |  |  |  |  |  |  |     |  |  |     |     |     | 142 | 399 | M   | 73 | 7  |    |  |  |  |  |  |  |  |  |  |  |  |  |  |  |  |  |  |  |  |  |  |  |     |     |   |    |     |     |   |     | 427 |     |     |     |   |    |   |  |  |  |  |  |  |  |  |  |  |  |  |  |  |  |  |  |  |  |  |  |     |  |  |  |     |  |     | 505 |     |    |     |    |  |  |  |  |  |  |  |  |  |  |  |  |  |  |  |  |  |  |  |  |  |  |     |     |   |    |   |  |  |     |     |     | 153 | 444 | F   | 85 | 9  |    |  |  |  |  |  |  |  |  |  |  |  |  |  |  |  |  |  |  |  |  |     |  |  |  |  |  |     |     |     |   | 511 |     |  |  |  |  |  |  |  |  |  |  |  |  |  |  |  |  |  |  |  |  |  |  |     |     |   |    |    |  |  |  |  |     | 163 | 361 | F   | 47 | 23  |     |   |    |    |  |  |  |  |  |  |  |  |  |  |  |  |  |  |  |  |  |     |  |  |  |  |  |  |     |  |     | 424 |     |     |     |     |   |    |    |  |  |  |  |  |  |  |  |  |  |  |  |  |  |  |  |     |     |   |    |   |  |  |  |     | yes |     |     |     |    |     |     |  |     |     |   |    |   |  |  |  |  |  |  |  |  |  |  |  |  |  |  |     |  |  |  |  |  |  |  |  |  |     |     |     |     |     |   |    |     |   |    |    |  |  |  |  |  |  |  |  |  |  |  |  |  |     |  |  |  |  |  |  |  |  |     |  |     |     |   |    |     |  |     |     |  |  |  |  |  |  |  |  |  |  |  |  |  |  |  |  |     |     |   |    |    |  |  |  |  |  |     |     |     |   |     |     |   |    |    |  |     |     |   |    |    |  |  |  |  |  |  |  |  |  |  |  |     |  |  |  |  |  |  |  |  |     |  |  |  |  |     |  |  |  |  |  |     |  |  |  |  |  |  |  |  |  |  |  |  |  |     |  |  |  |  |  |  |  |  |  |  |  |  |  |     |     |   |    |    |  |     |  |  |     |     |   |    |    |  |  |  |  |  |  |     |     |     |   |    |    |  |  |  |  |  |  |  |  |  |  |     |  |     |     |   |    |   |     |     |     |   |    |    |  |  |  |  |  |  |  |  |     |  |  |  |  |  |  |  |  |  |  |  |     |     |     |   |    |     |  |  |  |     |  |     |  |  |  |  |  |  |  |  |  |  |     |     |   |    |    |  |  |  |  |  |  |  |  |  |  |     |  |     |     |   |    |    |  |  |  |  |     |     |   |    |    |  |  |  |  |  |     |  |  |  |  |  |  |  |  |  |  |  |  |     |  |  |  |     |  |  |  |  |  |  |  |  |     |  |  |  |  |  |  |  |     |     |   |    |   |  |  |  |  |  |  |  |  |  |     |     |     |     |     |   |    |    |  |  |  |     |  |  |  |     |     |   |    |   |  |  |     |  |  |  |  |  |  |  |  |  |  |  |  |  |  |  |  |     |  |  |  |  |  |  |  |  |  |  |  |     |  |  |  |  |     |  |  |  |  |  |  |  |  |  |  |  |  |  |  |  |     |     |     |   |    |    |  |  |  |  |  |  |  |     |  |  |  |  |  |     |     |   |    |   |  |  |  |  |  |  |  |  |  |  |  |  |  |     |  |  |  |  |  |  |  |  |  |  |  |  |  |     |     |   |    |     |  |  |  |  |  |  |  |  |  |  |  |  |  |  |     |  |  |  |  |  |  |  |  |  |  |  |  |  |  |  |  |     |  |     |     |   |    |    |  |  |  |  |  |  |  |  |  |  |  |  |  |  |  |  |  |  |  |  |  |  |  |  |  |  |  |  |  |  |     |     |   |    |    |  |  |  |  |  |  |  |  |  |  |  |  |  |  |  |  |  |  |  |  |  |  |  |  |  |  |  |  |  |     |
|            | 075       |     |     |                           |        |            |       |        |          |          |        |          |            |    |            |       |        |          |          |        |          |        |    |            |       |        |       |        |                                |          |          |        |          |        |    | yes |     |     |  |  |  |  |  |  |  |  |  |  |  |  |  |  |  |  |  |  |  |  |  |  |  |  |  |  |  |  |  |  |     |     |     |     |     |     |    |    |    |  |  |  |  |  |  |  |  |  |  |  |  |  |  |  |  |  |  |  |  |  |  |  |  |  |  |  |     |     |     |     |     |     |     |    |    |  |  |  |  |  |  |  |  |  |  |  |  |  |  |  |  |  |  |  |  |  |  |  |  |  |     |     |     |     |    |     |     |     |     |    |    |    |  |  |  |  |  |  |  |  |  |  |  |  |  |  |  |  |  |  |  |  |  |  |  |  |  |     |     |     |     |     |     |    |    |     |     |  |  |  |  |  |  |  |  |  |  |  |  |  |  |  |  |  |  |  |  |  |  |  |     |     |     |     |    |     |     |     |     |     |     |     |    |    |    |  |  |  |  |  |  |  |  |  |  |  |  |  |  |  |  |  |  |  |  |  |  |     |     |     |     |     |    |     |     |     |     |    |     |     |  |  |  |  |  |  |  |  |  |  |  |  |  |  |  |  |  |  |  |  |  |     |     |     |    |     |     |     |     |     |    |    |     |     |     |   |    |    |  |  |  |  |  |  |  |  |  |  |  |  |  |  |  |  |  |  |  |     |     |     |     |     |     |     |     |    |     |     |     |     |    |    |     |  |  |  |  |  |  |  |  |  |  |  |  |  |  |  |  |  |  |     |     |     |    |     |     |     |     |     |    |    |    |  |  |  |     |     |   |    |   |  |  |  |  |  |  |  |  |  |  |  |  |  |  |  |  |     |     |     |     |     |     |     |     |    |  |  |  |  |     |     |     |     |    |     |    |  |  |  |  |  |  |  |  |  |  |  |  |  |  |     |     |   |    |     |     |     |     |     |     |    |    |    |     |     |     |   |    |     |     |     |    |   |  |  |  |  |  |  |  |  |  |  |  |  |     |     |     |     |     |     |     |     |     |     |     |   |    |   |  |  |     |  |     |     |     |   |     |    |  |  |  |  |  |  |  |  |  |  |  |     |     |     |    |     |     |     |     |     |     |     |     |    |  |  |  |  |     |     |     |     |     |     |     |    |   |  |  |  |  |  |  |  |  |  |  |     |     |     |     |     |     |     |     |     |     |     |     |    |    |    |  |  |  |  |  |     |     |     |   |     |    |  |  |  |  |  |  |  |  |     |     |   |     |     |     |     |     |     |     |     |     |     |  |  |  |  |  |  |     |  |     |     |     |     |     |     |    |    |  |  |  |  |  |  |  |     |     |     |     |     |     |     |     |     |     |     |     |    |    |    |  |  |  |  |  |  |  |  |     |     |     |   |     |   |  |  |  |  |  |     |  |  |     |     |     |     |     |     |     |     |    |     |  |  |  |  |  |  |  |  |  |  |     |     |     |     |     |     |     |    |   |  |  |  |  |     |     |     |     |     |     |     |     |     |     |     |     |    |    |    |  |  |  |  |  |  |  |  |  |  |  |  |     |     |   |     |   |  |  |  |  |  |     |     |     |     |     |     |     |     |    |     |  |  |  |  |  |  |  |  |  |  |  |  |  |  |     |     |     |     |    |     |  |  |  |  |  |     |     |     |     |     |     |     |     |     |     |    |    |    |  |  |  |  |  |  |  |  |  |  |  |     |     |     |     |     |     |    |    |   |  |     |     |     |     |     |     |     |     |     |    |     |  |  |  |  |  |  |  |  |  |  |  |  |  |  |  |  |  |  |     |     |   |     |     |  |  |  |     |     |     |     |     |     |     |     |     |    |    |    |  |  |  |  |  |  |  |  |  |  |  |  |  |  |  |     |     |     |     |     |   |    |     |     |     |     |     |     |     |     |    |     |  |  |  |  |  |  |  |  |  |  |  |  |  |  |  |  |  |  |  |     |     |     |     |    |    |     |     |     |     |     |     |     |     |     |     |    |    |   |  |  |  |  |  |  |  |  |  |  |  |  |  |  |  |  |  |  |     |     |   |     |     |     |    |     |     |     |     |     |     |     |  |  |  |  |  |  |  |  |  |  |  |  |  |  |  |  |  |  |  |  |  |  |  |     |     |     |     |     |     |     |     |     |     |     |     |    |    |   |  |  |  |  |  |  |  |  |  |  |  |  |  |  |  |  |  |  |  |  |     |     |     |     |     |     |   |     |     |     |     |     |  |  |  |  |  |  |  |  |  |  |  |  |  |  |  |  |  |  |  |  |  |  |  |  |  |  |     |     |     |    |     |     |     |     |     |    |    |    |  |  |  |  |  |  |  |  |  |  |  |  |  |  |  |  |  |  |  |  |  |  |     |     |   |    |   |     |     |     |     |     |  |  |  |  |  |  |  |  |  |  |  |  |  |  |  |  |  |  |  |  |  |  |  |  |  |  |     |  |  |     |     |     |     |     |     |    |    |    |  |  |  |  |  |  |  |  |  |  |  |  |  |  |  |  |  |  |  |  |  |  |     |     |   |    |     |     |   |     |     |     |     |     |   |    |   |  |  |  |  |  |  |  |  |  |  |  |  |  |  |  |  |  |  |  |  |  |     |  |  |  |     |  |     |     |     |    |     |    |  |  |  |  |  |  |  |  |  |  |  |  |  |  |  |  |  |  |  |  |  |  |     |     |   |    |   |  |  |     |     |     |     |     |     |    |    |    |  |  |  |  |  |  |  |  |  |  |  |  |  |  |  |  |  |  |  |  |     |  |  |  |  |  |     |     |     |   |     |     |  |  |  |  |  |  |  |  |  |  |  |  |  |  |  |  |  |  |  |  |  |  |     |     |   |    |    |  |  |  |  |     |     |     |     |    |     |     |   |    |    |  |  |  |  |  |  |  |  |  |  |  |  |  |  |  |  |  |     |  |  |  |  |  |  |     |  |     |     |     |     |     |     |   |    |    |  |  |  |  |  |  |  |  |  |  |  |  |  |  |  |  |     |     |   |    |   |  |  |  |     |     |     |     |     |    |     |     |  |     |     |   |    |   |  |  |  |  |  |  |  |  |  |  |  |  |  |  |     |  |  |  |  |  |  |  |  |  |     |     |     |     |     |   |    |     |   |    |    |  |  |  |  |  |  |  |  |  |  |  |  |  |     |  |  |  |  |  |  |  |  |     |  |     |     |   |    |     |  |     |     |  |  |  |  |  |  |  |  |  |  |  |  |  |  |  |  |     |     |   |    |    |  |  |  |  |  |     |     |     |   |     |     |   |    |    |  |     |     |   |    |    |  |  |  |  |  |  |  |  |  |  |  |     |  |  |  |  |  |  |  |  |     |  |  |  |  |     |  |  |  |  |  |     |  |  |  |  |  |  |  |  |  |  |  |  |  |     |  |  |  |  |  |  |  |  |  |  |  |  |  |     |     |   |    |    |  |     |  |  |     |     |   |    |    |  |  |  |  |  |  |     |     |     |   |    |    |  |  |  |  |  |  |  |  |  |  |     |  |     |     |   |    |   |     |     |     |   |    |    |  |  |  |  |  |  |  |  |     |  |  |  |  |  |  |  |  |  |  |  |     |     |     |   |    |     |  |  |  |     |  |     |  |  |  |  |  |  |  |  |  |  |     |     |   |    |    |  |  |  |  |  |  |  |  |  |  |     |  |     |     |   |    |    |  |  |  |  |     |     |   |    |    |  |  |  |  |  |     |  |  |  |  |  |  |  |  |  |  |  |  |     |  |  |  |     |  |  |  |  |  |  |  |  |     |  |  |  |  |  |  |  |     |     |   |    |   |  |  |  |  |  |  |  |  |  |     |     |     |     |     |   |    |    |  |  |  |     |  |  |  |     |     |   |    |   |  |  |     |  |  |  |  |  |  |  |  |  |  |  |  |  |  |  |  |     |  |  |  |  |  |  |  |  |  |  |  |     |  |  |  |  |     |  |  |  |  |  |  |  |  |  |  |  |  |  |  |  |     |     |     |   |    |    |  |  |  |  |  |  |  |     |  |  |  |  |  |     |     |   |    |   |  |  |  |  |  |  |  |  |  |  |  |  |  |     |  |  |  |  |  |  |  |  |  |  |  |  |  |     |     |   |    |     |  |  |  |  |  |  |  |  |  |  |  |  |  |  |     |  |  |  |  |  |  |  |  |  |  |  |  |  |  |  |  |     |  |     |     |   |    |    |  |  |  |  |  |  |  |  |  |  |  |  |  |  |  |  |  |  |  |  |  |  |  |  |  |  |  |  |  |  |     |     |   |    |    |  |  |  |  |  |  |  |  |  |  |  |  |  |  |  |  |  |  |  |  |  |  |  |  |  |  |  |  |  |     |
| 056        | 030       | F   | 79  | 10                        |        |            |       |        |          |          |        |          |            |    |            |       |        |          |          |        |          |        |    |            |       |        |       |        |                                |          |          |        |          |        |    | 076 |     |     |  |  |  |  |  |  |  |  |  |  |  |  |  |  |  |  |  |  |  |  |  |  |  |  |  |  |  |  |  |  |     |     |     |     |     | 297 |    |    |    |  |  |  |  |  |  |  |  |  |  |  |  |  |  |  |  |  |  |  |  |  |  |  |  |  |  |  |     |     |     | yes | 060 | 257 | F   | 53 | 14 |  |  |  |  |  |  |  |  |  |  |  |  |  |  |  |  |  |  |  |  |  |  |  |  |  |     |     |     |     |    |     | 323 |     |     |    |    |    |  |  |  |  |  |  |  |  |  |  |  |  |  |  |  |  |  |  |  |  |  |  |  |  |  |     |     |     | 061 | 104 | F   | 79 | 13 |     |     |  |  |  |  |  |  |  |  |  |  |  |  |  |  |  |  |  |  |  |  |  |  |  |     |     |     |     |    |     | 312 |     |     |     |     |     |    |    |    |  |  |  |  |  |  |  |  |  |  |  |  |  |  |  |  |  |  |  |  |  |  |     |     |     | 064 | 044 | F  | 75  | 23  |     |     |    |     |     |  |  |  |  |  |  |  |  |  |  |  |  |  |  |  |  |  |  |  |  |  |     |     |     |    |     | 102 |     |     |     |    |    |     |     |     |   |    |    |  |  |  |  |  |  |  |  |  |  |  |  |  |  |  |  |  |  |  |     |     | yes | 065 | 259 | F   | 43  | 9   |    |     |     |     |     |    |    |     |  |  |  |  |  |  |  |  |  |  |  |  |  |  |  |  |  |  |     |     |     |    |     | 322 |     |     |     |    |    |    |  |  |  |     |     |   |    |   |  |  |  |  |  |  |  |  |  |  |  |  |  |  |  |  |     |     |     | 070 | 063 | F   | 48  | 4   |    |  |  |  |  |     |     |     |     |    |     |    |  |  |  |  |  |  |  |  |  |  |  |  |  |  |     |     |   |    |     | 286 |     |     |     |     |    |    |    |     |     |     |   |    |     |     |     |    |   |  |  |  |  |  |  |  |  |  |  |  |  |     |     |     |     | 072 | 025 | F   | 80  | 7   |     |     |   |    |   |  |  |     |  |     |     |     |   |     |    |  |  |  |  |  |  |  |  |  |  |  |     |     |     |    |     | 342 |     |     |     |     |     |     |    |  |  |  |  |     |     |     |     |     |     |     |    |   |  |  |  |  |  |  |  |  |  |  |     |     |     | 076 | 038 | F   | 52  | 7   |     |     |     |     |    |    |    |  |  |  |  |  |     |     |     |   |     |    |  |  |  |  |  |  |  |  |     |     |   |     |     | 098 |     |     |     |     |     |     |     |  |  |  |  |  |  |     |  |     |     |     |     |     |     |    |    |  |  |  |  |  |  |  |     |     |     | 078 | 262 | F   | 85  | 14  |     |     |     |     |    |    |    |  |  |  |  |  |  |  |  |     |     |     |   |     |   |  |  |  |  |  |     |  |  |     |     | 291 |     |     |     |     |     |    |     |  |  |  |  |  |  |  |  |  |  |     |     |     |     |     |     |     |    |   |  |  |  |  |     |     |     | 079 | 314 | F   | 88  | 8   |     |     |     |     |    |    |    |  |  |  |  |  |  |  |  |  |  |  |  |     |     |   |     |   |  |  |  |  |  |     |     | 335 |     |     |     |     |     |    |     |  |  |  |  |  |  |  |  |  |  |  |  |  |  |     |     |     |     |    |     |  |  |  |  |  |     |     | 468 |     |     |     |     |     |     |     |    |    |    |  |  |  |  |  |  |  |  |  |  |  |     |     |     |     |     |     |    |    |   |  |     |     |     |     |     | 080 | 054 | F   | 71  | 10 |     |  |  |  |  |  |  |  |  |  |  |  |  |  |  |  |  |  |  |     |     |   |     |     |  |  |  |     |     |     |     | 089 |     |     |     |     |    |    |    |  |  |  |  |  |  |  |  |  |  |  |  |  |  |  |     |     |     |     |     |   |    |     |     |     |     |     | 131 |     |     |    |     |  |  |  |  |  |  |  |  |  |  |  |  |  |  |  |  |  |  |  |     |     |     |     |    |    |     |     |     |     |     |     | yes | 083 | 020 | M   | 67 | 18 |   |  |  |  |  |  |  |  |  |  |  |  |  |  |  |  |  |  |  |     |     |   |     |     |     |    |     |     |     |     |     | 088 |     |  |  |  |  |  |  |  |  |  |  |  |  |  |  |  |  |  |  |  |  |  |  |  |     |     |     |     |     |     |     |     |     | 084 | 012 | M   | 45 | 23 |   |  |  |  |  |  |  |  |  |  |  |  |  |  |  |  |  |  |  |  |  |     |     |     |     |     |     |   |     |     |     | 021 |     |  |  |  |  |  |  |  |  |  |  |  |  |  |  |  |  |  |  |  |  |  |  |  |  |  |  |     |     |     |    |     |     | 142 | 399 | M   | 73 | 7  |    |  |  |  |  |  |  |  |  |  |  |  |  |  |  |  |  |  |  |  |  |  |  |     |     |   |    |   |     |     |     | 427 |     |  |  |  |  |  |  |  |  |  |  |  |  |  |  |  |  |  |  |  |  |  |  |  |  |  |  |     |  |  |     |     |     |     | 505 |     |    |    |    |  |  |  |  |  |  |  |  |  |  |  |  |  |  |  |  |  |  |  |  |  |  |     |     |   |    |     |     |   |     |     |     | 153 | 444 | F | 85 | 9 |  |  |  |  |  |  |  |  |  |  |  |  |  |  |  |  |  |  |  |  |  |     |  |  |  |     |  |     |     |     |    | 511 |    |  |  |  |  |  |  |  |  |  |  |  |  |  |  |  |  |  |  |  |  |  |  |     |     |   |    |   |  |  |     |     |     | 163 | 361 | F   | 47 | 23 |    |  |  |  |  |  |  |  |  |  |  |  |  |  |  |  |  |  |  |  |  |     |  |  |  |  |  |     |     |     |   | 424 |     |  |  |  |  |  |  |  |  |  |  |  |  |  |  |  |  |  |  |  |  |  |  |     |     |   |    |    |  |  |  |  | yes |     |     |     |    |     |     |   |    |    |  |  |  |  |  |  |  |  |  |  |  |  |  |  |  |  |  |     |  |  |  |  |  |  |     |  |     |     |     |     |     |     |   |    |    |  |  |  |  |  |  |  |  |  |  |  |  |  |  |  |  |     |     |   |    |   |  |  |  |     |     |     |     |     |    |     |     |  |     |     |   |    |   |  |  |  |  |  |  |  |  |  |  |  |  |  |  |     |  |  |  |  |  |  |  |  |  |     |     |     |     |     |   |    |     |   |    |    |  |  |  |  |  |  |  |  |  |  |  |  |  |     |  |  |  |  |  |  |  |  |     |  |     |     |   |    |     |  |     |     |  |  |  |  |  |  |  |  |  |  |  |  |  |  |  |  |     |     |   |    |    |  |  |  |  |  |     |     |     |   |     |     |   |    |    |  |     |     |   |    |    |  |  |  |  |  |  |  |  |  |  |  |     |  |  |  |  |  |  |  |  |     |  |  |  |  |     |  |  |  |  |  |     |  |  |  |  |  |  |  |  |  |  |  |  |  |     |  |  |  |  |  |  |  |  |  |  |  |  |  |     |     |   |    |    |  |     |  |  |     |     |   |    |    |  |  |  |  |  |  |     |     |     |   |    |    |  |  |  |  |  |  |  |  |  |  |     |  |     |     |   |    |   |     |     |     |   |    |    |  |  |  |  |  |  |  |  |     |  |  |  |  |  |  |  |  |  |  |  |     |     |     |   |    |     |  |  |  |     |  |     |  |  |  |  |  |  |  |  |  |  |     |     |   |    |    |  |  |  |  |  |  |  |  |  |  |     |  |     |     |   |    |    |  |  |  |  |     |     |   |    |    |  |  |  |  |  |     |  |  |  |  |  |  |  |  |  |  |  |  |     |  |  |  |     |  |  |  |  |  |  |  |  |     |  |  |  |  |  |  |  |     |     |   |    |   |  |  |  |  |  |  |  |  |  |     |     |     |     |     |   |    |    |  |  |  |     |  |  |  |     |     |   |    |   |  |  |     |  |  |  |  |  |  |  |  |  |  |  |  |  |  |  |  |     |  |  |  |  |  |  |  |  |  |  |  |     |  |  |  |  |     |  |  |  |  |  |  |  |  |  |  |  |  |  |  |  |     |     |     |   |    |    |  |  |  |  |  |  |  |     |  |  |  |  |  |     |     |   |    |   |  |  |  |  |  |  |  |  |  |  |  |  |  |     |  |  |  |  |  |  |  |  |  |  |  |  |  |     |     |   |    |     |  |  |  |  |  |  |  |  |  |  |  |  |  |  |     |  |  |  |  |  |  |  |  |  |  |  |  |  |  |  |  |     |  |     |     |   |    |    |  |  |  |  |  |  |  |  |  |  |  |  |  |  |  |  |  |  |  |  |  |  |  |  |  |  |  |  |  |  |     |     |   |    |    |  |  |  |  |  |  |  |  |  |  |  |  |  |  |  |  |  |  |  |  |  |  |  |  |  |  |  |  |  |     |
|            | 076       |     |     |                           |        |            |       |        |          |          |        |          |            |    |            |       |        |          |          |        |          |        |    |            |       |        |       |        |                                |          |          |        |          |        |    |     |     | 297 |  |  |  |  |  |  |  |  |  |  |  |  |  |  |  |  |  |  |  |  |  |  |  |  |  |  |  |  |  |  |     |     |     | yes | 060 | 257 | F  | 53 | 14 |  |  |  |  |  |  |  |  |  |  |  |  |  |  |  |  |  |  |  |  |  |  |  |  |  |  |  |     |     |     |     |     | 323 |     |    |    |  |  |  |  |  |  |  |  |  |  |  |  |  |  |  |  |  |  |  |  |  |  |  |  |  |     |     |     |     |    |     |     | 061 | 104 | F  | 79 | 13 |  |  |  |  |  |  |  |  |  |  |  |  |  |  |  |  |  |  |  |  |  |  |  |  |  |     |     |     |     |     |     |    |    |     | 312 |  |  |  |  |  |  |  |  |  |  |  |  |  |  |  |  |  |  |  |  |  |  |  |     |     |     |     |    |     |     |     |     |     | 064 | 044 | F  | 75 | 23 |  |  |  |  |  |  |  |  |  |  |  |  |  |  |  |  |  |  |  |  |  |  |     |     |     |     |     |    |     |     |     |     |    |     | 102 |  |  |  |  |  |  |  |  |  |  |  |  |  |  |  |  |  |  |  |  |  |     |     |     |    |     |     |     |     |     |    |    | yes | 065 | 259 | F | 43 | 9  |  |  |  |  |  |  |  |  |  |  |  |  |  |  |  |  |  |  |  |     |     |     |     |     |     |     |     |    |     |     |     |     |    |    | 322 |  |  |  |  |  |  |  |  |  |  |  |  |  |  |  |  |  |  |     |     |     |    |     |     |     |     |     |    |    |    |  |  |  | 070 | 063 | F | 48 | 4 |  |  |  |  |  |  |  |  |  |  |  |  |  |  |  |  |     |     |     |     |     |     |     |     |    |  |  |  |  |     |     |     |     |    | 286 |    |  |  |  |  |  |  |  |  |  |  |  |  |  |  |     |     |   |    |     |     |     |     |     |     |    |    |    |     |     |     |   |    | 072 | 025 | F   | 80 | 7 |  |  |  |  |  |  |  |  |  |  |  |  |     |     |     |     |     |     |     |     |     |     |     |   |    |   |  |  |     |  |     |     |     |   | 342 |    |  |  |  |  |  |  |  |  |  |  |  |     |     |     |    |     |     |     |     |     |     |     |     |    |  |  |  |  |     |     |     |     | 076 | 038 | F   | 52 | 7 |  |  |  |  |  |  |  |  |  |  |     |     |     |     |     |     |     |     |     |     |     |     |    |    |    |  |  |  |  |  |     |     |     |   | 098 |    |  |  |  |  |  |  |  |  |     |     |   |     |     |     |     |     |     |     |     |     |     |  |  |  |  |  |  |     |  |     |     |     | 078 | 262 | F   | 85 | 14 |  |  |  |  |  |  |  |     |     |     |     |     |     |     |     |     |     |     |     |    |    |    |  |  |  |  |  |  |  |  |     |     |     |   | 291 |   |  |  |  |  |  |     |  |  |     |     |     |     |     |     |     |     |    |     |  |  |  |  |  |  |  |  |  |  |     |     |     |     | 079 | 314 | F   | 88 | 8 |  |  |  |  |     |     |     |     |     |     |     |     |     |     |     |     |    |    |    |  |  |  |  |  |  |  |  |  |  |  |  |     |     |   | 335 |   |  |  |  |  |  |     |     |     |     |     |     |     |     |    |     |  |  |  |  |  |  |  |  |  |  |  |  |  |  |     |     |     | 468 |    |     |  |  |  |  |  |     |     |     |     |     |     |     |     |     |     |    |    |    |  |  |  |  |  |  |  |  |  |  |  |     |     |     | 080 | 054 | F   | 71 | 10 |   |  |     |     |     |     |     |     |     |     |     |    |     |  |  |  |  |  |  |  |  |  |  |  |  |  |  |  |  |  |  |     |     |   | 089 |     |  |  |  |     |     |     |     |     |     |     |     |     |    |    |    |  |  |  |  |  |  |  |  |  |  |  |  |  |  |  |     |     | 131 |     |     |   |    |     |     |     |     |     |     |     |     |    |     |  |  |  |  |  |  |  |  |  |  |  |  |  |  |  |  |  |  |  | yes | 083 | 020 | M   | 67 | 18 |     |     |     |     |     |     |     |     |     |     |    |    |   |  |  |  |  |  |  |  |  |  |  |  |  |  |  |  |  |  |  |     |     |   | 088 |     |     |    |     |     |     |     |     |     |     |  |  |  |  |  |  |  |  |  |  |  |  |  |  |  |  |  |  |  |  |  |  |  | 084 | 012 | M   | 45  | 23  |     |     |     |     |     |     |     |    |    |   |  |  |  |  |  |  |  |  |  |  |  |  |  |  |  |  |  |  |  |  |     |     |     |     | 021 |     |   |     |     |     |     |     |  |  |  |  |  |  |  |  |  |  |  |  |  |  |  |  |  |  |  |  |  |  |  |  |  |  | 142 | 399 | M   | 73 | 7   |     |     |     |     |    |    |    |  |  |  |  |  |  |  |  |  |  |  |  |  |  |  |  |  |  |  |  |  |  |     |     |   |    |   | 427 |     |     |     |     |  |  |  |  |  |  |  |  |  |  |  |  |  |  |  |  |  |  |  |  |  |  |  |  |  |  |     |  |  | 505 |     |     |     |     |     |    |    |    |  |  |  |  |  |  |  |  |  |  |  |  |  |  |  |  |  |  |  |  |  |  |     |     |   |    | 153 | 444 | F | 85  | 9   |     |     |     |   |    |   |  |  |  |  |  |  |  |  |  |  |  |  |  |  |  |  |  |  |  |  |  |     |  |  |  |     |  |     | 511 |     |    |     |    |  |  |  |  |  |  |  |  |  |  |  |  |  |  |  |  |  |  |  |  |  |  |     |     |   |    |   |  |  | 163 | 361 | F   |     | 47  |     |    | 23 |    |  |  |  |  |  |  |  |  |  |  |  |  |  |  |  |  |  |  |  |  |     |  |  |  |  |  |     |     |     |   | 424 |     |  |  |  |  |  |  |  |  |  |  |  |  |  |  |  |  |  |  |  |  |  |  |     |     |   |    |    |  |  |  |  | yes |     |     |     |    |     |     |   |    |    |  |  |  |  |  |  |  |  |  |  |  |  |  |  |  |  |  |     |  |  |  |  |  |  |     |  |     |     |     |     |     |     |   |    |    |  |  |  |  |  |  |  |  |  |  |  |  |  |  |  |  |     |     |   |    |   |  |  |  |     |     |     |     |     |    |     |     |  |     |     |   |    |   |  |  |  |  |  |  |  |  |  |  |  |  |  |  |     |  |  |  |  |  |  |  |  |  |     |     |     |     |     |   |    |     |   |    |    |  |  |  |  |  |  |  |  |  |  |  |  |  |     |  |  |  |  |  |  |  |  |     |  |     |     |   |    |     |  |     |     |  |  |  |  |  |  |  |  |  |  |  |  |  |  |  |  |     |     |   |    |    |  |  |  |  |  |     |     |     |   |     |     |   |    |    |  |     |     |   |    |    |  |  |  |  |  |  |  |  |  |  |  |     |  |  |  |  |  |  |  |  |     |  |  |  |  |     |  |  |  |  |  |     |  |  |  |  |  |  |  |  |  |  |  |  |  |     |  |  |  |  |  |  |  |  |  |  |  |  |  |     |     |   |    |    |  |     |  |  |     |     |   |    |    |  |  |  |  |  |  |     |     |     |   |    |    |  |  |  |  |  |  |  |  |  |  |     |  |     |     |   |    |   |     |     |     |   |    |    |  |  |  |  |  |  |  |  |     |  |  |  |  |  |  |  |  |  |  |  |     |     |     |   |    |     |  |  |  |     |  |     |  |  |  |  |  |  |  |  |  |  |     |     |   |    |    |  |  |  |  |  |  |  |  |  |  |     |  |     |     |   |    |    |  |  |  |  |     |     |   |    |    |  |  |  |  |  |     |  |  |  |  |  |  |  |  |  |  |  |  |     |  |  |  |     |  |  |  |  |  |  |  |  |     |  |  |  |  |  |  |  |     |     |   |    |   |  |  |  |  |  |  |  |  |  |     |     |     |     |     |   |    |    |  |  |  |     |  |  |  |     |     |   |    |   |  |  |     |  |  |  |  |  |  |  |  |  |  |  |  |  |  |  |  |     |  |  |  |  |  |  |  |  |  |  |  |     |  |  |  |  |     |  |  |  |  |  |  |  |  |  |  |  |  |  |  |  |     |     |     |   |    |    |  |  |  |  |  |  |  |     |  |  |  |  |  |     |     |   |    |   |  |  |  |  |  |  |  |  |  |  |  |  |  |     |  |  |  |  |  |  |  |  |  |  |  |  |  |     |     |   |    |     |  |  |  |  |  |  |  |  |  |  |  |  |  |  |     |  |  |  |  |  |  |  |  |  |  |  |  |  |  |  |  |     |  |     |     |   |    |    |  |  |  |  |  |  |  |  |  |  |  |  |  |  |  |  |  |  |  |  |  |  |  |  |  |  |  |  |  |  |     |     |   |    |    |  |  |  |  |  |  |  |  |  |  |  |  |  |  |  |  |  |  |  |  |  |  |  |  |  |  |  |  |  |     |
|            | 297       |     |     |                           |        |            |       |        |          |          |        |          |            |    |            |       |        |          |          |        |          |        |    |            |       |        |       |        |                                |          |          |        |          |        |    |     | yes |     |  |  |  |  |  |  |  |  |  |  |  |  |  |  |  |  |  |  |  |  |  |  |  |  |  |  |  |  |  |  |     |     |     |     |     |     |    |    |    |  |  |  |  |  |  |  |  |  |  |  |  |  |  |  |  |  |  |  |  |  |  |  |  |  |  |  |     |     |     |     |     |     |     |    |    |  |  |  |  |  |  |  |  |  |  |  |  |  |  |  |  |  |  |  |  |  |  |  |  |  |     |     |     |     |    |     |     |     |     |    |    |    |  |  |  |  |  |  |  |  |  |  |  |  |  |  |  |  |  |  |  |  |  |  |  |  |  |     |     |     |     |     |     |    |    |     |     |  |  |  |  |  |  |  |  |  |  |  |  |  |  |  |  |  |  |  |  |  |  |  |     |     |     |     |    |     |     |     |     |     |     |     |    |    |    |  |  |  |  |  |  |  |  |  |  |  |  |  |  |  |  |  |  |  |  |  |  |     |     |     |     |     |    |     |     |     |     |    |     |     |  |  |  |  |  |  |  |  |  |  |  |  |  |  |  |  |  |  |  |  |  |     |     |     |    |     |     |     |     |     |    |    |     |     |     |   |    |    |  |  |  |  |  |  |  |  |  |  |  |  |  |  |  |  |  |  |  |     |     |     |     |     |     |     |     |    |     |     |     |     |    |    |     |  |  |  |  |  |  |  |  |  |  |  |  |  |  |  |  |  |  |     |     |     |    |     |     |     |     |     |    |    |    |  |  |  |     |     |   |    |   |  |  |  |  |  |  |  |  |  |  |  |  |  |  |  |  |     |     |     |     |     |     |     |     |    |  |  |  |  |     |     |     |     |    |     |    |  |  |  |  |  |  |  |  |  |  |  |  |  |  |     |     |   |    |     |     |     |     |     |     |    |    |    |     |     |     |   |    |     |     |     |    |   |  |  |  |  |  |  |  |  |  |  |  |  |     |     |     |     |     |     |     |     |     |     |     |   |    |   |  |  |     |  |     |     |     |   |     |    |  |  |  |  |  |  |  |  |  |  |  |     |     |     |    |     |     |     |     |     |     |     |     |    |  |  |  |  |     |     |     |     |     |     |     |    |   |  |  |  |  |  |  |  |  |  |  |     |     |     |     |     |     |     |     |     |     |     |     |    |    |    |  |  |  |  |  |     |     |     |   |     |    |  |  |  |  |  |  |  |  |     |     |   |     |     |     |     |     |     |     |     |     |     |  |  |  |  |  |  |     |  |     |     |     |     |     |     |    |    |  |  |  |  |  |  |  |     |     |     |     |     |     |     |     |     |     |     |     |    |    |    |  |  |  |  |  |  |  |  |     |     |     |   |     |   |  |  |  |  |  |     |  |  |     |     |     |     |     |     |     |     |    |     |  |  |  |  |  |  |  |  |  |  |     |     |     |     |     |     |     |    |   |  |  |  |  |     |     |     |     |     |     |     |     |     |     |     |     |    |    |    |  |  |  |  |  |  |  |  |  |  |  |  |     |     |   |     |   |  |  |  |  |  |     |     |     |     |     |     |     |     |    |     |  |  |  |  |  |  |  |  |  |  |  |  |  |  |     |     |     |     |    |     |  |  |  |  |  |     |     |     |     |     |     |     |     |     |     |    |    |    |  |  |  |  |  |  |  |  |  |  |  |     |     |     |     |     |     |    |    |   |  |     |     |     |     |     |     |     |     |     |    |     |  |  |  |  |  |  |  |  |  |  |  |  |  |  |  |  |  |  |     |     |   |     |     |  |  |  |     |     |     |     |     |     |     |     |     |    |    |    |  |  |  |  |  |  |  |  |  |  |  |  |  |  |  |     |     |     |     |     |   |    |     |     |     |     |     |     |     |     |    |     |  |  |  |  |  |  |  |  |  |  |  |  |  |  |  |  |  |  |  |     |     |     |     |    |    |     |     |     |     |     |     |     |     |     |     |    |    |   |  |  |  |  |  |  |  |  |  |  |  |  |  |  |  |  |  |  |     |     |   |     |     |     |    |     |     |     |     |     |     |     |  |  |  |  |  |  |  |  |  |  |  |  |  |  |  |  |  |  |  |  |  |  |  |     |     |     |     |     |     |     |     |     |     |     |     |    |    |   |  |  |  |  |  |  |  |  |  |  |  |  |  |  |  |  |  |  |  |  |     |     |     |     |     |     |   |     |     |     |     |     |  |  |  |  |  |  |  |  |  |  |  |  |  |  |  |  |  |  |  |  |  |  |  |  |  |  |     |     |     |    |     |     |     |     |     |    |    |    |  |  |  |  |  |  |  |  |  |  |  |  |  |  |  |  |  |  |  |  |  |  |     |     |   |    |   |     |     |     |     |     |  |  |  |  |  |  |  |  |  |  |  |  |  |  |  |  |  |  |  |  |  |  |  |  |  |  |     |  |  |     |     |     |     |     |     |    |    |    |  |  |  |  |  |  |  |  |  |  |  |  |  |  |  |  |  |  |  |  |  |  |     |     |   |    |     |     |   |     |     |     |     |     |   |    |   |  |  |  |  |  |  |  |  |  |  |  |  |  |  |  |  |  |  |  |  |  |     |  |  |  |     |  |     |     |     |    |     |    |  |  |  |  |  |  |  |  |  |  |  |  |  |  |  |  |  |  |  |  |  |  |     |     |   |    |   |  |  |     |     |     |     |     |     |    |    |    |  |  |  |  |  |  |  |  |  |  |  |  |  |  |  |  |  |  |  |  |     |  |  |  |  |  |     |     |     |   |     |     |  |  |  |  |  |  |  |  |  |  |  |  |  |  |  |  |  |  |  |  |  |  |     |     |   |    |    |  |  |  |  |     |     |     |     |    |     |     |   |    |    |  |  |  |  |  |  |  |  |  |  |  |  |  |  |  |  |  |     |  |  |  |  |  |  |     |  |     |     |     |     |     |     |   |    |    |  |  |  |  |  |  |  |  |  |  |  |  |  |  |  |  |     |     |   |    |   |  |  |  |     |     |     |     |     |    |     |     |  |     |     |   |    |   |  |  |  |  |  |  |  |  |  |  |  |  |  |  |     |  |  |  |  |  |  |  |  |  |     |     |     |     |     |   |    |     |   |    |    |  |  |  |  |  |  |  |  |  |  |  |  |  |     |  |  |  |  |  |  |  |  |     |  |     |     |   |    |     |  |     |     |  |  |  |  |  |  |  |  |  |  |  |  |  |  |  |  |     |     |   |    |    |  |  |  |  |  |     |     |     |   |     |     |   |    |    |  |     |     |   |    |    |  |  |  |  |  |  |  |  |  |  |  |     |  |  |  |  |  |  |  |  |     |  |  |  |  |     |  |  |  |  |  |     |  |  |  |  |  |  |  |  |  |  |  |  |  |     |  |  |  |  |  |  |  |  |  |  |  |  |  |     |     |   |    |    |  |     |  |  |     |     |   |    |    |  |  |  |  |  |  |     |     |     |   |    |    |  |  |  |  |  |  |  |  |  |  |     |  |     |     |   |    |   |     |     |     |   |    |    |  |  |  |  |  |  |  |  |     |  |  |  |  |  |  |  |  |  |  |  |     |     |     |   |    |     |  |  |  |     |  |     |  |  |  |  |  |  |  |  |  |  |     |     |   |    |    |  |  |  |  |  |  |  |  |  |  |     |  |     |     |   |    |    |  |  |  |  |     |     |   |    |    |  |  |  |  |  |     |  |  |  |  |  |  |  |  |  |  |  |  |     |  |  |  |     |  |  |  |  |  |  |  |  |     |  |  |  |  |  |  |  |     |     |   |    |   |  |  |  |  |  |  |  |  |  |     |     |     |     |     |   |    |    |  |  |  |     |  |  |  |     |     |   |    |   |  |  |     |  |  |  |  |  |  |  |  |  |  |  |  |  |  |  |  |     |  |  |  |  |  |  |  |  |  |  |  |     |  |  |  |  |     |  |  |  |  |  |  |  |  |  |  |  |  |  |  |  |     |     |     |   |    |    |  |  |  |  |  |  |  |     |  |  |  |  |  |     |     |   |    |   |  |  |  |  |  |  |  |  |  |  |  |  |  |     |  |  |  |  |  |  |  |  |  |  |  |  |  |     |     |   |    |     |  |  |  |  |  |  |  |  |  |  |  |  |  |  |     |  |  |  |  |  |  |  |  |  |  |  |  |  |  |  |  |     |  |     |     |   |    |    |  |  |  |  |  |  |  |  |  |  |  |  |  |  |  |  |  |  |  |  |  |  |  |  |  |  |  |  |  |  |     |     |   |    |    |  |  |  |  |  |  |  |  |  |  |  |  |  |  |  |  |  |  |  |  |  |  |  |  |  |  |  |  |  |     |
| 060        | 257       | F   | 53  | 14                        |        |            |       |        |          |          |        |          |            |    |            |       |        |          |          |        |          |        |    |            |       |        |       |        |                                |          |          |        |          |        |    | 323 |     |     |  |  |  |  |  |  |  |  |  |  |  |  |  |  |  |  |  |  |  |  |  |  |  |  |  |  |  |  |  |  |     | 061 | 104 | F   | 79  | 13  |    |    |    |  |  |  |  |  |  |  |  |  |  |  |  |  |  |  |  |  |  |  |  |  |  |  |  |  |  |  |     | 312 |     |     |     |     |     |    |    |  |  |  |  |  |  |  |  |  |  |  |  |  |  |  |  |  |  |  |  |  |  |  |  |  |     | 064 | 044 | F   | 75 | 23  |     |     |     |    |    |    |  |  |  |  |  |  |  |  |  |  |  |  |  |  |  |  |  |  |  |  |  |  |  |  |  | 102 |     |     |     |     |     |    |    |     |     |  |  |  |  |  |  |  |  |  |  |  |  |  |  |  |  |  |  |  |  |  |  |  | yes | 065 | 259 | F   | 43 | 9   |     |     |     |     |     |     |    |    |    |  |  |  |  |  |  |  |  |  |  |  |  |  |  |  |  |  |  |  |  |  |  | 322 |     |     |     |     |    |     |     |     |     |    |     |     |  |  |  |  |  |  |  |  |  |  |  |  |  |  |  |  |  |  |  |  |  | 070 | 063 | F   | 48 | 4   |     |     |     |     |    |    |     |     |     |   |    |    |  |  |  |  |  |  |  |  |  |  |  |  |  |  |  |  |  |  |  | 286 |     |     |     |     |     |     |     |    |     |     |     |     |    |    |     |  |  |  |  |  |  |  |  |  |  |  |  |  |  |  |  |  |  | 072 | 025 | F   | 80 | 7   |     |     |     |     |    |    |    |  |  |  |     |     |   |    |   |  |  |  |  |  |  |  |  |  |  |  |  |  |  |  |  | 342 |     |     |     |     |     |     |     |    |  |  |  |  |     |     |     |     |    |     |    |  |  |  |  |  |  |  |  |  |  |  |  |  |  | 076 | 038 | F | 52 | 7   |     |     |     |     |     |    |    |    |     |     |     |   |    |     |     |     |    |   |  |  |  |  |  |  |  |  |  |  |  |  |     | 098 |     |     |     |     |     |     |     |     |     |   |    |   |  |  |     |  |     |     |     |   |     |    |  |  |  |  |  |  |  |  |  |  |  | 078 | 262 | F   | 85 | 14  |     |     |     |     |     |     |     |    |  |  |  |  |     |     |     |     |     |     |     |    |   |  |  |  |  |  |  |  |  |  |  | 291 |     |     |     |     |     |     |     |     |     |     |     |    |    |    |  |  |  |  |  |     |     |     |   |     |    |  |  |  |  |  |  |  |  | 079 | 314 | F | 88  | 8   |     |     |     |     |     |     |     |     |  |  |  |  |  |  |     |  |     |     |     |     |     |     |    |    |  |  |  |  |  |  |  | 335 |     |     |     |     |     |     |     |     |     |     |     |    |    |    |  |  |  |  |  |  |  |  |     |     |     |   |     |   |  |  |  |  |  | 468 |  |  |     |     |     |     |     |     |     |     |    |     |  |  |  |  |  |  |  |  |  |  |     |     |     |     |     |     |     |    |   |  |  |  |  |     |     | 080 | 054 | F   | 71  | 10  |     |     |     |     |     |    |    |    |  |  |  |  |  |  |  |  |  |  |  |  |     |     |   |     |   |  |  |  |  |  |     | 089 |     |     |     |     |     |     |    |     |  |  |  |  |  |  |  |  |  |  |  |  |  |  |     |     |     |     |    |     |  |  |  |  |  | 131 |     |     |     |     |     |     |     |     |     |    |    |    |  |  |  |  |  |  |  |  |  |  |  |     |     |     |     |     |     |    |    |   |  |     |     |     | yes | 083 | 020 | M   | 67  | 18  |    |     |  |  |  |  |  |  |  |  |  |  |  |  |  |  |  |  |  |  |     |     |   |     |     |  |  |  |     |     |     | 088 |     |     |     |     |     |    |    |    |  |  |  |  |  |  |  |  |  |  |  |  |  |  |  |     |     |     |     |     |   |    |     |     |     | 084 | 012 | M   | 45  | 23  |    |     |  |  |  |  |  |  |  |  |  |  |  |  |  |  |  |  |  |  |  |     |     |     |     |    |    |     |     |     |     | 021 |     |     |     |     |     |    |    |   |  |  |  |  |  |  |  |  |  |  |  |  |  |  |  |  |  |  |     |     |   |     |     |     |    | 142 | 399 | M   | 73  | 7   |     |     |  |  |  |  |  |  |  |  |  |  |  |  |  |  |  |  |  |  |  |  |  |  |  |     |     |     |     |     |     | 427 |     |     |     |     |     |    |    |   |  |  |  |  |  |  |  |  |  |  |  |  |  |  |  |  |  |  |  |  |     |     |     |     |     | 505 |   |     |     |     |     |     |  |  |  |  |  |  |  |  |  |  |  |  |  |  |  |  |  |  |  |  |  |  |  |  |  |  |     |     |     |    |     | 153 | 444 | F   | 85  | 9  |    |    |  |  |  |  |  |  |  |  |  |  |  |  |  |  |  |  |  |  |  |  |  |  |     |     |   |    |   |     |     | 511 |     |     |  |  |  |  |  |  |  |  |  |  |  |  |  |  |  |  |  |  |  |  |  |  |  |  |  |  |     |  |  |     |     | 163 | 361 | F   | 47  | 23 |    |    |  |  |  |  |  |  |  |  |  |  |  |  |  |  |  |  |  |  |  |  |  |  |     |     |   |    |     |     |   | 424 |     |     |     |     |   |    |   |  |  |  |  |  |  |  |  |  |  |  |  |  |  |  |  |  |  |  |  |  |     |  |  |  | yes |  |     |     |     |    |     |    |  |  |  |  |  |  |  |  |  |  |  |  |  |  |  |  |  |  |  |  |  |  |     |     |   |    |   |  |  |     |     |     |     |     |     |    |    |    |  |  |  |  |  |  |  |  |  |  |  |  |  |  |  |  |  |  |  |  |     |  |  |  |  |  |     |     |     |   |     |     |  |  |  |  |  |  |  |  |  |  |  |  |  |  |  |  |  |  |  |  |  |  |     |     |   |    |    |  |  |  |  |     |     |     |     |    |     |     |   |    |    |  |  |  |  |  |  |  |  |  |  |  |  |  |  |  |  |  |     |  |  |  |  |  |  |     |  |     |     |     |     |     |     |   |    |    |  |  |  |  |  |  |  |  |  |  |  |  |  |  |  |  |     |     |   |    |   |  |  |  |     |     |     |     |     |    |     |     |  |     |     |   |    |   |  |  |  |  |  |  |  |  |  |  |  |  |  |  |     |  |  |  |  |  |  |  |  |  |     |     |     |     |     |   |    |     |   |    |    |  |  |  |  |  |  |  |  |  |  |  |  |  |     |  |  |  |  |  |  |  |  |     |  |     |     |   |    |     |  |     |     |  |  |  |  |  |  |  |  |  |  |  |  |  |  |  |  |     |     |   |    |    |  |  |  |  |  |     |     |     |   |     |     |   |    |    |  |     |     |   |    |    |  |  |  |  |  |  |  |  |  |  |  |     |  |  |  |  |  |  |  |  |     |  |  |  |  |     |  |  |  |  |  |     |  |  |  |  |  |  |  |  |  |  |  |  |  |     |  |  |  |  |  |  |  |  |  |  |  |  |  |     |     |   |    |    |  |     |  |  |     |     |   |    |    |  |  |  |  |  |  |     |     |     |   |    |    |  |  |  |  |  |  |  |  |  |  |     |  |     |     |   |    |   |     |     |     |   |    |    |  |  |  |  |  |  |  |  |     |  |  |  |  |  |  |  |  |  |  |  |     |     |     |   |    |     |  |  |  |     |  |     |  |  |  |  |  |  |  |  |  |  |     |     |   |    |    |  |  |  |  |  |  |  |  |  |  |     |  |     |     |   |    |    |  |  |  |  |     |     |   |    |    |  |  |  |  |  |     |  |  |  |  |  |  |  |  |  |  |  |  |     |  |  |  |     |  |  |  |  |  |  |  |  |     |  |  |  |  |  |  |  |     |     |   |    |   |  |  |  |  |  |  |  |  |  |     |     |     |     |     |   |    |    |  |  |  |     |  |  |  |     |     |   |    |   |  |  |     |  |  |  |  |  |  |  |  |  |  |  |  |  |  |  |  |     |  |  |  |  |  |  |  |  |  |  |  |     |  |  |  |  |     |  |  |  |  |  |  |  |  |  |  |  |  |  |  |  |     |     |     |   |    |    |  |  |  |  |  |  |  |     |  |  |  |  |  |     |     |   |    |   |  |  |  |  |  |  |  |  |  |  |  |  |  |     |  |  |  |  |  |  |  |  |  |  |  |  |  |     |     |   |    |     |  |  |  |  |  |  |  |  |  |  |  |  |  |  |     |  |  |  |  |  |  |  |  |  |  |  |  |  |  |  |  |     |  |     |     |   |    |    |  |  |  |  |  |  |  |  |  |  |  |  |  |  |  |  |  |  |  |  |  |  |  |  |  |  |  |  |  |  |     |     |   |    |    |  |  |  |  |  |  |  |  |  |  |  |  |  |  |  |  |  |  |  |  |  |  |  |  |  |  |  |  |  |     |
|            | 323       |     |     |                           |        |            |       |        |          |          |        |          |            |    |            |       |        |          |          |        |          |        |    |            |       |        |       |        |                                |          |          |        |          |        |    |     |     |     |  |  |  |  |  |  |  |  |  |  |  |  |  |  |  |  |  |  |  |  |  |  |  |  |  |  |  |  |  |  |     |     |     |     |     |     |    |    |    |  |  |  |  |  |  |  |  |  |  |  |  |  |  |  |  |  |  |  |  |  |  |  |  |  |  |  |     |     |     |     |     |     |     |    |    |  |  |  |  |  |  |  |  |  |  |  |  |  |  |  |  |  |  |  |  |  |  |  |  |  |     |     |     |     |    |     |     |     |     |    |    |    |  |  |  |  |  |  |  |  |  |  |  |  |  |  |  |  |  |  |  |  |  |  |  |  |  |     |     |     |     |     |     |    |    |     |     |  |  |  |  |  |  |  |  |  |  |  |  |  |  |  |  |  |  |  |  |  |  |  |     |     |     |     |    |     |     |     |     |     |     |     |    |    |    |  |  |  |  |  |  |  |  |  |  |  |  |  |  |  |  |  |  |  |  |  |  |     |     |     |     |     |    |     |     |     |     |    |     |     |  |  |  |  |  |  |  |  |  |  |  |  |  |  |  |  |  |  |  |  |  |     |     |     |    |     |     |     |     |     |    |    |     |     |     |   |    |    |  |  |  |  |  |  |  |  |  |  |  |  |  |  |  |  |  |  |  |     |     |     |     |     |     |     |     |    |     |     |     |     |    |    |     |  |  |  |  |  |  |  |  |  |  |  |  |  |  |  |  |  |  |     |     |     |    |     |     |     |     |     |    |    |    |  |  |  |     |     |   |    |   |  |  |  |  |  |  |  |  |  |  |  |  |  |  |  |  |     |     |     |     |     |     |     |     |    |  |  |  |  |     |     |     |     |    |     |    |  |  |  |  |  |  |  |  |  |  |  |  |  |  |     |     |   |    |     |     |     |     |     |     |    |    |    |     |     |     |   |    |     |     |     |    |   |  |  |  |  |  |  |  |  |  |  |  |  |     |     |     |     |     |     |     |     |     |     |     |   |    |   |  |  |     |  |     |     |     |   |     |    |  |  |  |  |  |  |  |  |  |  |  |     |     |     |    |     |     |     |     |     |     |     |     |    |  |  |  |  |     |     |     |     |     |     |     |    |   |  |  |  |  |  |  |  |  |  |  |     |     |     |     |     |     |     |     |     |     |     |     |    |    |    |  |  |  |  |  |     |     |     |   |     |    |  |  |  |  |  |  |  |  |     |     |   |     |     |     |     |     |     |     |     |     |     |  |  |  |  |  |  |     |  |     |     |     |     |     |     |    |    |  |  |  |  |  |  |  |     |     |     |     |     |     |     |     |     |     |     |     |    |    |    |  |  |  |  |  |  |  |  |     |     |     |   |     |   |  |  |  |  |  |     |  |  |     |     |     |     |     |     |     |     |    |     |  |  |  |  |  |  |  |  |  |  |     |     |     |     |     |     |     |    |   |  |  |  |  |     |     |     |     |     |     |     |     |     |     |     |     |    |    |    |  |  |  |  |  |  |  |  |  |  |  |  |     |     |   |     |   |  |  |  |  |  |     |     |     |     |     |     |     |     |    |     |  |  |  |  |  |  |  |  |  |  |  |  |  |  |     |     |     |     |    |     |  |  |  |  |  |     |     |     |     |     |     |     |     |     |     |    |    |    |  |  |  |  |  |  |  |  |  |  |  |     |     |     |     |     |     |    |    |   |  |     |     |     |     |     |     |     |     |     |    |     |  |  |  |  |  |  |  |  |  |  |  |  |  |  |  |  |  |  |     |     |   |     |     |  |  |  |     |     |     |     |     |     |     |     |     |    |    |    |  |  |  |  |  |  |  |  |  |  |  |  |  |  |  |     |     |     |     |     |   |    |     |     |     |     |     |     |     |     |    |     |  |  |  |  |  |  |  |  |  |  |  |  |  |  |  |  |  |  |  |     |     |     |     |    |    |     |     |     |     |     |     |     |     |     |     |    |    |   |  |  |  |  |  |  |  |  |  |  |  |  |  |  |  |  |  |  |     |     |   |     |     |     |    |     |     |     |     |     |     |     |  |  |  |  |  |  |  |  |  |  |  |  |  |  |  |  |  |  |  |  |  |  |  |     |     |     |     |     |     |     |     |     |     |     |     |    |    |   |  |  |  |  |  |  |  |  |  |  |  |  |  |  |  |  |  |  |  |  |     |     |     |     |     |     |   |     |     |     |     |     |  |  |  |  |  |  |  |  |  |  |  |  |  |  |  |  |  |  |  |  |  |  |  |  |  |  |     |     |     |    |     |     |     |     |     |    |    |    |  |  |  |  |  |  |  |  |  |  |  |  |  |  |  |  |  |  |  |  |  |  |     |     |   |    |   |     |     |     |     |     |  |  |  |  |  |  |  |  |  |  |  |  |  |  |  |  |  |  |  |  |  |  |  |  |  |  |     |  |  |     |     |     |     |     |     |    |    |    |  |  |  |  |  |  |  |  |  |  |  |  |  |  |  |  |  |  |  |  |  |  |     |     |   |    |     |     |   |     |     |     |     |     |   |    |   |  |  |  |  |  |  |  |  |  |  |  |  |  |  |  |  |  |  |  |  |  |     |  |  |  |     |  |     |     |     |    |     |    |  |  |  |  |  |  |  |  |  |  |  |  |  |  |  |  |  |  |  |  |  |  |     |     |   |    |   |  |  |     |     |     |     |     |     |    |    |    |  |  |  |  |  |  |  |  |  |  |  |  |  |  |  |  |  |  |  |  |     |  |  |  |  |  |     |     |     |   |     |     |  |  |  |  |  |  |  |  |  |  |  |  |  |  |  |  |  |  |  |  |  |  |     |     |   |    |    |  |  |  |  |     |     |     |     |    |     |     |   |    |    |  |  |  |  |  |  |  |  |  |  |  |  |  |  |  |  |  |     |  |  |  |  |  |  |     |  |     |     |     |     |     |     |   |    |    |  |  |  |  |  |  |  |  |  |  |  |  |  |  |  |  |     |     |   |    |   |  |  |  |     |     |     |     |     |    |     |     |  |     |     |   |    |   |  |  |  |  |  |  |  |  |  |  |  |  |  |  |     |  |  |  |  |  |  |  |  |  |     |     |     |     |     |   |    |     |   |    |    |  |  |  |  |  |  |  |  |  |  |  |  |  |     |  |  |  |  |  |  |  |  |     |  |     |     |   |    |     |  |     |     |  |  |  |  |  |  |  |  |  |  |  |  |  |  |  |  |     |     |   |    |    |  |  |  |  |  |     |     |     |   |     |     |   |    |    |  |     |     |   |    |    |  |  |  |  |  |  |  |  |  |  |  |     |  |  |  |  |  |  |  |  |     |  |  |  |  |     |  |  |  |  |  |     |  |  |  |  |  |  |  |  |  |  |  |  |  |     |  |  |  |  |  |  |  |  |  |  |  |  |  |     |     |   |    |    |  |     |  |  |     |     |   |    |    |  |  |  |  |  |  |     |     |     |   |    |    |  |  |  |  |  |  |  |  |  |  |     |  |     |     |   |    |   |     |     |     |   |    |    |  |  |  |  |  |  |  |  |     |  |  |  |  |  |  |  |  |  |  |  |     |     |     |   |    |     |  |  |  |     |  |     |  |  |  |  |  |  |  |  |  |  |     |     |   |    |    |  |  |  |  |  |  |  |  |  |  |     |  |     |     |   |    |    |  |  |  |  |     |     |   |    |    |  |  |  |  |  |     |  |  |  |  |  |  |  |  |  |  |  |  |     |  |  |  |     |  |  |  |  |  |  |  |  |     |  |  |  |  |  |  |  |     |     |   |    |   |  |  |  |  |  |  |  |  |  |     |     |     |     |     |   |    |    |  |  |  |     |  |  |  |     |     |   |    |   |  |  |     |  |  |  |  |  |  |  |  |  |  |  |  |  |  |  |  |     |  |  |  |  |  |  |  |  |  |  |  |     |  |  |  |  |     |  |  |  |  |  |  |  |  |  |  |  |  |  |  |  |     |     |     |   |    |    |  |  |  |  |  |  |  |     |  |  |  |  |  |     |     |   |    |   |  |  |  |  |  |  |  |  |  |  |  |  |  |     |  |  |  |  |  |  |  |  |  |  |  |  |  |     |     |   |    |     |  |  |  |  |  |  |  |  |  |  |  |  |  |  |     |  |  |  |  |  |  |  |  |  |  |  |  |  |  |  |  |     |  |     |     |   |    |    |  |  |  |  |  |  |  |  |  |  |  |  |  |  |  |  |  |  |  |  |  |  |  |  |  |  |  |  |  |  |     |     |   |    |    |  |  |  |  |  |  |  |  |  |  |  |  |  |  |  |  |  |  |  |  |  |  |  |  |  |  |  |  |  |     |
| 061        | 104       | F   | 79  | 13                        |        |            |       |        |          |          |        |          |            |    |            |       |        |          |          |        |          |        |    |            |       |        |       |        |                                |          |          |        |          |        |    | 312 |     |     |  |  |  |  |  |  |  |  |  |  |  |  |  |  |  |  |  |  |  |  |  |  |  |  |  |  |  |  |  |  |     | 064 | 044 | F   | 75  | 23  |    |    |    |  |  |  |  |  |  |  |  |  |  |  |  |  |  |  |  |  |  |  |  |  |  |  |  |  |  |  |     | 102 |     |     |     |     |     |    |    |  |  |  |  |  |  |  |  |  |  |  |  |  |  |  |  |  |  |  |  |  |  |  |  |  | yes | 065 | 259 | F   | 43 | 9   |     |     |     |    |    |    |  |  |  |  |  |  |  |  |  |  |  |  |  |  |  |  |  |  |  |  |  |  |  |  |  | 322 |     |     |     |     |     |    |    |     |     |  |  |  |  |  |  |  |  |  |  |  |  |  |  |  |  |  |  |  |  |  |  |  |     | 070 | 063 | F   | 48 | 4   |     |     |     |     |     |     |    |    |    |  |  |  |  |  |  |  |  |  |  |  |  |  |  |  |  |  |  |  |  |  |  | 286 |     |     |     |     |    |     |     |     |     |    |     |     |  |  |  |  |  |  |  |  |  |  |  |  |  |  |  |  |  |  |  |  |  | 072 | 025 | F   | 80 | 7   |     |     |     |     |    |    |     |     |     |   |    |    |  |  |  |  |  |  |  |  |  |  |  |  |  |  |  |  |  |  |  | 342 |     |     |     |     |     |     |     |    |     |     |     |     |    |    |     |  |  |  |  |  |  |  |  |  |  |  |  |  |  |  |  |  |  | 076 | 038 | F   | 52 | 7   |     |     |     |     |    |    |    |  |  |  |     |     |   |    |   |  |  |  |  |  |  |  |  |  |  |  |  |  |  |  |  | 098 |     |     |     |     |     |     |     |    |  |  |  |  |     |     |     |     |    |     |    |  |  |  |  |  |  |  |  |  |  |  |  |  |  | 078 | 262 | F | 85 | 14  |     |     |     |     |     |    |    |    |     |     |     |   |    |     |     |     |    |   |  |  |  |  |  |  |  |  |  |  |  |  |     | 291 |     |     |     |     |     |     |     |     |     |   |    |   |  |  |     |  |     |     |     |   |     |    |  |  |  |  |  |  |  |  |  |  |  | 079 | 314 | F   | 88 | 8   |     |     |     |     |     |     |     |    |  |  |  |  |     |     |     |     |     |     |     |    |   |  |  |  |  |  |  |  |  |  |  | 335 |     |     |     |     |     |     |     |     |     |     |     |    |    |    |  |  |  |  |  |     |     |     |   |     |    |  |  |  |  |  |  |  |  |     | 468 |   |     |     |     |     |     |     |     |     |     |     |  |  |  |  |  |  |     |  |     |     |     |     |     |     |    |    |  |  |  |  |  |  |  |     |     | 080 | 054 | F   | 71  | 10  |     |     |     |     |     |    |    |    |  |  |  |  |  |  |  |  |     |     |     |   |     |   |  |  |  |  |  |     |  |  |     | 089 |     |     |     |     |     |     |    |     |  |  |  |  |  |  |  |  |  |  |     |     |     |     |     |     |     |    |   |  |  |  |  |     |     |     | 131 |     |     |     |     |     |     |     |     |    |    |    |  |  |  |  |  |  |  |  |  |  |  |  |     |     |   |     |   |  |  |  |  |  |     |     | yes | 083 | 020 | M   | 67  | 18  |    |     |  |  |  |  |  |  |  |  |  |  |  |  |  |  |     |     |     |     |    |     |  |  |  |  |  |     |     |     |     | 088 |     |     |     |     |     |    |    |    |  |  |  |  |  |  |  |  |  |  |  |     |     |     |     |     |     |    |    |   |  |     |     |     |     | 084 | 012 | M   | 45  | 23  |    |     |  |  |  |  |  |  |  |  |  |  |  |  |  |  |  |  |  |  |     |     |   |     |     |  |  |  |     |     |     | 021 |     |     |     |     |     |    |    |    |  |  |  |  |  |  |  |  |  |  |  |  |  |  |  |     |     |     |     |     |   |    |     |     |     | 142 | 399 | M   | 73  | 7   |    |     |  |  |  |  |  |  |  |  |  |  |  |  |  |  |  |  |  |  |  |     |     |     |     |    |    |     |     |     |     | 427 |     |     |     |     |     |    |    |   |  |  |  |  |  |  |  |  |  |  |  |  |  |  |  |  |  |  |     |     |   |     |     |     |    |     | 505 |     |     |     |     |     |  |  |  |  |  |  |  |  |  |  |  |  |  |  |  |  |  |  |  |  |  |  |  |     |     |     |     |     |     |     |     | 153 | 444 | F   | 85  | 9  |    |   |  |  |  |  |  |  |  |  |  |  |  |  |  |  |  |  |  |  |  |  |     |     |     |     |     |     |   |     |     | 511 |     |     |  |  |  |  |  |  |  |  |  |  |  |  |  |  |  |  |  |  |  |  |  |  |  |  |  |  |     |     |     |    |     | 163 | 361 | F   | 47  | 23 |    |    |  |  |  |  |  |  |  |  |  |  |  |  |  |  |  |  |  |  |  |  |  |  |     |     |   |    |   |     |     | 424 |     |     |  |  |  |  |  |  |  |  |  |  |  |  |  |  |  |  |  |  |  |  |  |  |  |  |  |  |     |  |  |     | yes |     |     |     |     |    |    |    |  |  |  |  |  |  |  |  |  |  |  |  |  |  |  |  |  |  |  |  |  |  |     |     |   |    |     |     |   |     |     |     |     |     |   |    |   |  |  |  |  |  |  |  |  |  |  |  |  |  |  |  |  |  |  |  |  |  |     |  |  |  |     |  |     |     |     |    |     |    |  |  |  |  |  |  |  |  |  |  |  |  |  |  |  |  |  |  |  |  |  |  |     |     |   |    |   |  |  |     |     |     |     |     |     |    |    |    |  |  |  |  |  |  |  |  |  |  |  |  |  |  |  |  |  |  |  |  |     |  |  |  |  |  |     |     |     |   |     |     |  |  |  |  |  |  |  |  |  |  |  |  |  |  |  |  |  |  |  |  |  |  |     |     |   |    |    |  |  |  |  |     |     |     |     |    |     |     |   |    |    |  |  |  |  |  |  |  |  |  |  |  |  |  |  |  |  |  |     |  |  |  |  |  |  |     |  |     |     |     |     |     |     |   |    |    |  |  |  |  |  |  |  |  |  |  |  |  |  |  |  |  |     |     |   |    |   |  |  |  |     |     |     |     |     |    |     |     |  |     |     |   |    |   |  |  |  |  |  |  |  |  |  |  |  |  |  |  |     |  |  |  |  |  |  |  |  |  |     |     |     |     |     |   |    |     |   |    |    |  |  |  |  |  |  |  |  |  |  |  |  |  |     |  |  |  |  |  |  |  |  |     |  |     |     |   |    |     |  |     |     |  |  |  |  |  |  |  |  |  |  |  |  |  |  |  |  |     |     |   |    |    |  |  |  |  |  |     |     |     |   |     |     |   |    |    |  |     |     |   |    |    |  |  |  |  |  |  |  |  |  |  |  |     |  |  |  |  |  |  |  |  |     |  |  |  |  |     |  |  |  |  |  |     |  |  |  |  |  |  |  |  |  |  |  |  |  |     |  |  |  |  |  |  |  |  |  |  |  |  |  |     |     |   |    |    |  |     |  |  |     |     |   |    |    |  |  |  |  |  |  |     |     |     |   |    |    |  |  |  |  |  |  |  |  |  |  |     |  |     |     |   |    |   |     |     |     |   |    |    |  |  |  |  |  |  |  |  |     |  |  |  |  |  |  |  |  |  |  |  |     |     |     |   |    |     |  |  |  |     |  |     |  |  |  |  |  |  |  |  |  |  |     |     |   |    |    |  |  |  |  |  |  |  |  |  |  |     |  |     |     |   |    |    |  |  |  |  |     |     |   |    |    |  |  |  |  |  |     |  |  |  |  |  |  |  |  |  |  |  |  |     |  |  |  |     |  |  |  |  |  |  |  |  |     |  |  |  |  |  |  |  |     |     |   |    |   |  |  |  |  |  |  |  |  |  |     |     |     |     |     |   |    |    |  |  |  |     |  |  |  |     |     |   |    |   |  |  |     |  |  |  |  |  |  |  |  |  |  |  |  |  |  |  |  |     |  |  |  |  |  |  |  |  |  |  |  |     |  |  |  |  |     |  |  |  |  |  |  |  |  |  |  |  |  |  |  |  |     |     |     |   |    |    |  |  |  |  |  |  |  |     |  |  |  |  |  |     |     |   |    |   |  |  |  |  |  |  |  |  |  |  |  |  |  |     |  |  |  |  |  |  |  |  |  |  |  |  |  |     |     |   |    |     |  |  |  |  |  |  |  |  |  |  |  |  |  |  |     |  |  |  |  |  |  |  |  |  |  |  |  |  |  |  |  |     |  |     |     |   |    |    |  |  |  |  |  |  |  |  |  |  |  |  |  |  |  |  |  |  |  |  |  |  |  |  |  |  |  |  |  |  |     |     |   |    |    |  |  |  |  |  |  |  |  |  |  |  |  |  |  |  |  |  |  |  |  |  |  |  |  |  |  |  |  |  |     |
|            | 312       |     |     |                           |        |            |       |        |          |          |        |          |            |    |            |       |        |          |          |        |          |        |    |            |       |        |       |        |                                |          |          |        |          |        |    |     |     |     |  |  |  |  |  |  |  |  |  |  |  |  |  |  |  |  |  |  |  |  |  |  |  |  |  |  |  |  |  |  |     |     |     |     |     |     |    |    |    |  |  |  |  |  |  |  |  |  |  |  |  |  |  |  |  |  |  |  |  |  |  |  |  |  |  |  |     |     |     |     |     |     |     |    |    |  |  |  |  |  |  |  |  |  |  |  |  |  |  |  |  |  |  |  |  |  |  |  |  |  |     |     |     |     |    |     |     |     |     |    |    |    |  |  |  |  |  |  |  |  |  |  |  |  |  |  |  |  |  |  |  |  |  |  |  |  |  |     |     |     |     |     |     |    |    |     |     |  |  |  |  |  |  |  |  |  |  |  |  |  |  |  |  |  |  |  |  |  |  |  |     |     |     |     |    |     |     |     |     |     |     |     |    |    |    |  |  |  |  |  |  |  |  |  |  |  |  |  |  |  |  |  |  |  |  |  |  |     |     |     |     |     |    |     |     |     |     |    |     |     |  |  |  |  |  |  |  |  |  |  |  |  |  |  |  |  |  |  |  |  |  |     |     |     |    |     |     |     |     |     |    |    |     |     |     |   |    |    |  |  |  |  |  |  |  |  |  |  |  |  |  |  |  |  |  |  |  |     |     |     |     |     |     |     |     |    |     |     |     |     |    |    |     |  |  |  |  |  |  |  |  |  |  |  |  |  |  |  |  |  |  |     |     |     |    |     |     |     |     |     |    |    |    |  |  |  |     |     |   |    |   |  |  |  |  |  |  |  |  |  |  |  |  |  |  |  |  |     |     |     |     |     |     |     |     |    |  |  |  |  |     |     |     |     |    |     |    |  |  |  |  |  |  |  |  |  |  |  |  |  |  |     |     |   |    |     |     |     |     |     |     |    |    |    |     |     |     |   |    |     |     |     |    |   |  |  |  |  |  |  |  |  |  |  |  |  |     |     |     |     |     |     |     |     |     |     |     |   |    |   |  |  |     |  |     |     |     |   |     |    |  |  |  |  |  |  |  |  |  |  |  |     |     |     |    |     |     |     |     |     |     |     |     |    |  |  |  |  |     |     |     |     |     |     |     |    |   |  |  |  |  |  |  |  |  |  |  |     |     |     |     |     |     |     |     |     |     |     |     |    |    |    |  |  |  |  |  |     |     |     |   |     |    |  |  |  |  |  |  |  |  |     |     |   |     |     |     |     |     |     |     |     |     |     |  |  |  |  |  |  |     |  |     |     |     |     |     |     |    |    |  |  |  |  |  |  |  |     |     |     |     |     |     |     |     |     |     |     |     |    |    |    |  |  |  |  |  |  |  |  |     |     |     |   |     |   |  |  |  |  |  |     |  |  |     |     |     |     |     |     |     |     |    |     |  |  |  |  |  |  |  |  |  |  |     |     |     |     |     |     |     |    |   |  |  |  |  |     |     |     |     |     |     |     |     |     |     |     |     |    |    |    |  |  |  |  |  |  |  |  |  |  |  |  |     |     |   |     |   |  |  |  |  |  |     |     |     |     |     |     |     |     |    |     |  |  |  |  |  |  |  |  |  |  |  |  |  |  |     |     |     |     |    |     |  |  |  |  |  |     |     |     |     |     |     |     |     |     |     |    |    |    |  |  |  |  |  |  |  |  |  |  |  |     |     |     |     |     |     |    |    |   |  |     |     |     |     |     |     |     |     |     |    |     |  |  |  |  |  |  |  |  |  |  |  |  |  |  |  |  |  |  |     |     |   |     |     |  |  |  |     |     |     |     |     |     |     |     |     |    |    |    |  |  |  |  |  |  |  |  |  |  |  |  |  |  |  |     |     |     |     |     |   |    |     |     |     |     |     |     |     |     |    |     |  |  |  |  |  |  |  |  |  |  |  |  |  |  |  |  |  |  |  |     |     |     |     |    |    |     |     |     |     |     |     |     |     |     |     |    |    |   |  |  |  |  |  |  |  |  |  |  |  |  |  |  |  |  |  |  |     |     |   |     |     |     |    |     |     |     |     |     |     |     |  |  |  |  |  |  |  |  |  |  |  |  |  |  |  |  |  |  |  |  |  |  |  |     |     |     |     |     |     |     |     |     |     |     |     |    |    |   |  |  |  |  |  |  |  |  |  |  |  |  |  |  |  |  |  |  |  |  |     |     |     |     |     |     |   |     |     |     |     |     |  |  |  |  |  |  |  |  |  |  |  |  |  |  |  |  |  |  |  |  |  |  |  |  |  |  |     |     |     |    |     |     |     |     |     |    |    |    |  |  |  |  |  |  |  |  |  |  |  |  |  |  |  |  |  |  |  |  |  |  |     |     |   |    |   |     |     |     |     |     |  |  |  |  |  |  |  |  |  |  |  |  |  |  |  |  |  |  |  |  |  |  |  |  |  |  |     |  |  |     |     |     |     |     |     |    |    |    |  |  |  |  |  |  |  |  |  |  |  |  |  |  |  |  |  |  |  |  |  |  |     |     |   |    |     |     |   |     |     |     |     |     |   |    |   |  |  |  |  |  |  |  |  |  |  |  |  |  |  |  |  |  |  |  |  |  |     |  |  |  |     |  |     |     |     |    |     |    |  |  |  |  |  |  |  |  |  |  |  |  |  |  |  |  |  |  |  |  |  |  |     |     |   |    |   |  |  |     |     |     |     |     |     |    |    |    |  |  |  |  |  |  |  |  |  |  |  |  |  |  |  |  |  |  |  |  |     |  |  |  |  |  |     |     |     |   |     |     |  |  |  |  |  |  |  |  |  |  |  |  |  |  |  |  |  |  |  |  |  |  |     |     |   |    |    |  |  |  |  |     |     |     |     |    |     |     |   |    |    |  |  |  |  |  |  |  |  |  |  |  |  |  |  |  |  |  |     |  |  |  |  |  |  |     |  |     |     |     |     |     |     |   |    |    |  |  |  |  |  |  |  |  |  |  |  |  |  |  |  |  |     |     |   |    |   |  |  |  |     |     |     |     |     |    |     |     |  |     |     |   |    |   |  |  |  |  |  |  |  |  |  |  |  |  |  |  |     |  |  |  |  |  |  |  |  |  |     |     |     |     |     |   |    |     |   |    |    |  |  |  |  |  |  |  |  |  |  |  |  |  |     |  |  |  |  |  |  |  |  |     |  |     |     |   |    |     |  |     |     |  |  |  |  |  |  |  |  |  |  |  |  |  |  |  |  |     |     |   |    |    |  |  |  |  |  |     |     |     |   |     |     |   |    |    |  |     |     |   |    |    |  |  |  |  |  |  |  |  |  |  |  |     |  |  |  |  |  |  |  |  |     |  |  |  |  |     |  |  |  |  |  |     |  |  |  |  |  |  |  |  |  |  |  |  |  |     |  |  |  |  |  |  |  |  |  |  |  |  |  |     |     |   |    |    |  |     |  |  |     |     |   |    |    |  |  |  |  |  |  |     |     |     |   |    |    |  |  |  |  |  |  |  |  |  |  |     |  |     |     |   |    |   |     |     |     |   |    |    |  |  |  |  |  |  |  |  |     |  |  |  |  |  |  |  |  |  |  |  |     |     |     |   |    |     |  |  |  |     |  |     |  |  |  |  |  |  |  |  |  |  |     |     |   |    |    |  |  |  |  |  |  |  |  |  |  |     |  |     |     |   |    |    |  |  |  |  |     |     |   |    |    |  |  |  |  |  |     |  |  |  |  |  |  |  |  |  |  |  |  |     |  |  |  |     |  |  |  |  |  |  |  |  |     |  |  |  |  |  |  |  |     |     |   |    |   |  |  |  |  |  |  |  |  |  |     |     |     |     |     |   |    |    |  |  |  |     |  |  |  |     |     |   |    |   |  |  |     |  |  |  |  |  |  |  |  |  |  |  |  |  |  |  |  |     |  |  |  |  |  |  |  |  |  |  |  |     |  |  |  |  |     |  |  |  |  |  |  |  |  |  |  |  |  |  |  |  |     |     |     |   |    |    |  |  |  |  |  |  |  |     |  |  |  |  |  |     |     |   |    |   |  |  |  |  |  |  |  |  |  |  |  |  |  |     |  |  |  |  |  |  |  |  |  |  |  |  |  |     |     |   |    |     |  |  |  |  |  |  |  |  |  |  |  |  |  |  |     |  |  |  |  |  |  |  |  |  |  |  |  |  |  |  |  |     |  |     |     |   |    |    |  |  |  |  |  |  |  |  |  |  |  |  |  |  |  |  |  |  |  |  |  |  |  |  |  |  |  |  |  |  |     |     |   |    |    |  |  |  |  |  |  |  |  |  |  |  |  |  |  |  |  |  |  |  |  |  |  |  |  |  |  |  |  |  |     |
| 064        | 044       | F   | 75  | 23                        |        |            |       |        |          |          |        |          |            |    |            |       |        |          |          |        |          |        |    |            |       |        |       |        |                                |          |          |        |          |        |    | 102 |     |     |  |  |  |  |  |  |  |  |  |  |  |  |  |  |  |  |  |  |  |  |  |  |  |  |  |  |  |  |  |  | yes | 065 | 259 | F   | 43  | 9   |    |    |    |  |  |  |  |  |  |  |  |  |  |  |  |  |  |  |  |  |  |  |  |  |  |  |  |  |  |  |     | 322 |     |     |     |     |     |    |    |  |  |  |  |  |  |  |  |  |  |  |  |  |  |  |  |  |  |  |  |  |  |  |  |  |     | 070 | 063 | F   | 48 | 4   |     |     |     |    |    |    |  |  |  |  |  |  |  |  |  |  |  |  |  |  |  |  |  |  |  |  |  |  |  |  |  | 286 |     |     |     |     |     |    |    |     |     |  |  |  |  |  |  |  |  |  |  |  |  |  |  |  |  |  |  |  |  |  |  |  |     | 072 | 025 | F   | 80 | 7   |     |     |     |     |     |     |    |    |    |  |  |  |  |  |  |  |  |  |  |  |  |  |  |  |  |  |  |  |  |  |  | 342 |     |     |     |     |    |     |     |     |     |    |     |     |  |  |  |  |  |  |  |  |  |  |  |  |  |  |  |  |  |  |  |  |  | 076 | 038 | F   | 52 | 7   |     |     |     |     |    |    |     |     |     |   |    |    |  |  |  |  |  |  |  |  |  |  |  |  |  |  |  |  |  |  |  | 098 |     |     |     |     |     |     |     |    |     |     |     |     |    |    |     |  |  |  |  |  |  |  |  |  |  |  |  |  |  |  |  |  |  | 078 | 262 | F   | 85 | 14  |     |     |     |     |    |    |    |  |  |  |     |     |   |    |   |  |  |  |  |  |  |  |  |  |  |  |  |  |  |  |  | 291 |     |     |     |     |     |     |     |    |  |  |  |  |     |     |     |     |    |     |    |  |  |  |  |  |  |  |  |  |  |  |  |  |  | 079 | 314 | F | 88 | 8   |     |     |     |     |     |    |    |    |     |     |     |   |    |     |     |     |    |   |  |  |  |  |  |  |  |  |  |  |  |  |     | 335 |     |     |     |     |     |     |     |     |     |   |    |   |  |  |     |  |     |     |     |   |     |    |  |  |  |  |  |  |  |  |  |  |  |     | 468 |     |    |     |     |     |     |     |     |     |     |    |  |  |  |  |     |     |     |     |     |     |     |    |   |  |  |  |  |  |  |  |  |  |  |     |     | 080 | 054 | F   | 71  | 10  |     |     |     |     |     |    |    |    |  |  |  |  |  |     |     |     |   |     |    |  |  |  |  |  |  |  |  |     |     |   |     | 089 |     |     |     |     |     |     |     |     |  |  |  |  |  |  |     |  |     |     |     |     |     |     |    |    |  |  |  |  |  |  |  |     |     |     | 131 |     |     |     |     |     |     |     |     |    |    |    |  |  |  |  |  |  |  |  |     |     |     |   |     |   |  |  |  |  |  |     |  |  |     |     | yes | 083 | 020 | M   | 67  | 18  |    |     |  |  |  |  |  |  |  |  |  |  |     |     |     |     |     |     |     |    |   |  |  |  |  |     |     |     |     |     |     | 088 |     |     |     |     |     |    |    |    |  |  |  |  |  |  |  |  |  |  |  |  |     |     |   |     |   |  |  |  |  |  |     |     |     | 084 | 012 | M   | 45  | 23  |    |     |  |  |  |  |  |  |  |  |  |  |  |  |  |  |     |     |     |     |    |     |  |  |  |  |  |     |     |     |     | 021 |     |     |     |     |     |    |    |    |  |  |  |  |  |  |  |  |  |  |  |     |     |     |     |     |     |    |    |   |  |     |     |     |     | 142 | 399 | M   | 73  | 7   |    |     |  |  |  |  |  |  |  |  |  |  |  |  |  |  |  |  |  |  |     |     |   |     |     |  |  |  |     |     |     | 427 |     |     |     |     |     |    |    |    |  |  |  |  |  |  |  |  |  |  |  |  |  |  |  |     |     |     |     |     |   |    |     |     |     |     | 505 |     |     |     |    |     |  |  |  |  |  |  |  |  |  |  |  |  |  |  |  |  |  |  |  |     |     |     |     |    |    |     |     |     |     |     |     | 153 | 444 | F   | 85  | 9  |    |   |  |  |  |  |  |  |  |  |  |  |  |  |  |  |  |  |  |  |     |     |   |     |     |     |    |     |     |     |     | 511 |     |     |  |  |  |  |  |  |  |  |  |  |  |  |  |  |  |  |  |  |  |  |  |  |  |     |     |     |     |     |     |     |     | 163 | 361 | F   | 47  | 23 |    |   |  |  |  |  |  |  |  |  |  |  |  |  |  |  |  |  |  |  |  |  |     |     |     |     |     |     |   |     |     | 424 |     |     |  |  |  |  |  |  |  |  |  |  |  |  |  |  |  |  |  |  |  |  |  |  |  |  |  |  |     |     |     |    | yes |     |     |     |     |    |    |    |  |  |  |  |  |  |  |  |  |  |  |  |  |  |  |  |  |  |  |  |  |  |     |     |   |    |   |     |     |     |     |     |  |  |  |  |  |  |  |  |  |  |  |  |  |  |  |  |  |  |  |  |  |  |  |  |  |  |     |  |  |     |     |     |     |     |     |    |    |    |  |  |  |  |  |  |  |  |  |  |  |  |  |  |  |  |  |  |  |  |  |  |     |     |   |    |     |     |   |     |     |     |     |     |   |    |   |  |  |  |  |  |  |  |  |  |  |  |  |  |  |  |  |  |  |  |  |  |     |  |  |  |     |  |     |     |     |    |     |    |  |  |  |  |  |  |  |  |  |  |  |  |  |  |  |  |  |  |  |  |  |  |     |     |   |    |   |  |  |     |     |     |     |     |     |    |    |    |  |  |  |  |  |  |  |  |  |  |  |  |  |  |  |  |  |  |  |  |     |  |  |  |  |  |     |     |     |   |     |     |  |  |  |  |  |  |  |  |  |  |  |  |  |  |  |  |  |  |  |  |  |  |     |     |   |    |    |  |  |  |  |     |     |     |     |    |     |     |   |    |    |  |  |  |  |  |  |  |  |  |  |  |  |  |  |  |  |  |     |  |  |  |  |  |  |     |  |     |     |     |     |     |     |   |    |    |  |  |  |  |  |  |  |  |  |  |  |  |  |  |  |  |     |     |   |    |   |  |  |  |     |     |     |     |     |    |     |     |  |     |     |   |    |   |  |  |  |  |  |  |  |  |  |  |  |  |  |  |     |  |  |  |  |  |  |  |  |  |     |     |     |     |     |   |    |     |   |    |    |  |  |  |  |  |  |  |  |  |  |  |  |  |     |  |  |  |  |  |  |  |  |     |  |     |     |   |    |     |  |     |     |  |  |  |  |  |  |  |  |  |  |  |  |  |  |  |  |     |     |   |    |    |  |  |  |  |  |     |     |     |   |     |     |   |    |    |  |     |     |   |    |    |  |  |  |  |  |  |  |  |  |  |  |     |  |  |  |  |  |  |  |  |     |  |  |  |  |     |  |  |  |  |  |     |  |  |  |  |  |  |  |  |  |  |  |  |  |     |  |  |  |  |  |  |  |  |  |  |  |  |  |     |     |   |    |    |  |     |  |  |     |     |   |    |    |  |  |  |  |  |  |     |     |     |   |    |    |  |  |  |  |  |  |  |  |  |  |     |  |     |     |   |    |   |     |     |     |   |    |    |  |  |  |  |  |  |  |  |     |  |  |  |  |  |  |  |  |  |  |  |     |     |     |   |    |     |  |  |  |     |  |     |  |  |  |  |  |  |  |  |  |  |     |     |   |    |    |  |  |  |  |  |  |  |  |  |  |     |  |     |     |   |    |    |  |  |  |  |     |     |   |    |    |  |  |  |  |  |     |  |  |  |  |  |  |  |  |  |  |  |  |     |  |  |  |     |  |  |  |  |  |  |  |  |     |  |  |  |  |  |  |  |     |     |   |    |   |  |  |  |  |  |  |  |  |  |     |     |     |     |     |   |    |    |  |  |  |     |  |  |  |     |     |   |    |   |  |  |     |  |  |  |  |  |  |  |  |  |  |  |  |  |  |  |  |     |  |  |  |  |  |  |  |  |  |  |  |     |  |  |  |  |     |  |  |  |  |  |  |  |  |  |  |  |  |  |  |  |     |     |     |   |    |    |  |  |  |  |  |  |  |     |  |  |  |  |  |     |     |   |    |   |  |  |  |  |  |  |  |  |  |  |  |  |  |     |  |  |  |  |  |  |  |  |  |  |  |  |  |     |     |   |    |     |  |  |  |  |  |  |  |  |  |  |  |  |  |  |     |  |  |  |  |  |  |  |  |  |  |  |  |  |  |  |  |     |  |     |     |   |    |    |  |  |  |  |  |  |  |  |  |  |  |  |  |  |  |  |  |  |  |  |  |  |  |  |  |  |  |  |  |  |     |     |   |    |    |  |  |  |  |  |  |  |  |  |  |  |  |  |  |  |  |  |  |  |  |  |  |  |  |  |  |  |  |  |     |
|            | 102       |     |     |                           |        |            |       |        |          |          |        |          |            |    |            |       |        |          |          |        |          |        |    |            |       |        |       |        |                                |          |          |        |          |        |    | yes |     |     |  |  |  |  |  |  |  |  |  |  |  |  |  |  |  |  |  |  |  |  |  |  |  |  |  |  |  |  |  |  |     |     |     |     |     |     |    |    |    |  |  |  |  |  |  |  |  |  |  |  |  |  |  |  |  |  |  |  |  |  |  |  |  |  |  |  |     |     |     |     |     |     |     |    |    |  |  |  |  |  |  |  |  |  |  |  |  |  |  |  |  |  |  |  |  |  |  |  |  |  |     |     |     |     |    |     |     |     |     |    |    |    |  |  |  |  |  |  |  |  |  |  |  |  |  |  |  |  |  |  |  |  |  |  |  |  |  |     |     |     |     |     |     |    |    |     |     |  |  |  |  |  |  |  |  |  |  |  |  |  |  |  |  |  |  |  |  |  |  |  |     |     |     |     |    |     |     |     |     |     |     |     |    |    |    |  |  |  |  |  |  |  |  |  |  |  |  |  |  |  |  |  |  |  |  |  |  |     |     |     |     |     |    |     |     |     |     |    |     |     |  |  |  |  |  |  |  |  |  |  |  |  |  |  |  |  |  |  |  |  |  |     |     |     |    |     |     |     |     |     |    |    |     |     |     |   |    |    |  |  |  |  |  |  |  |  |  |  |  |  |  |  |  |  |  |  |  |     |     |     |     |     |     |     |     |    |     |     |     |     |    |    |     |  |  |  |  |  |  |  |  |  |  |  |  |  |  |  |  |  |  |     |     |     |    |     |     |     |     |     |    |    |    |  |  |  |     |     |   |    |   |  |  |  |  |  |  |  |  |  |  |  |  |  |  |  |  |     |     |     |     |     |     |     |     |    |  |  |  |  |     |     |     |     |    |     |    |  |  |  |  |  |  |  |  |  |  |  |  |  |  |     |     |   |    |     |     |     |     |     |     |    |    |    |     |     |     |   |    |     |     |     |    |   |  |  |  |  |  |  |  |  |  |  |  |  |     |     |     |     |     |     |     |     |     |     |     |   |    |   |  |  |     |  |     |     |     |   |     |    |  |  |  |  |  |  |  |  |  |  |  |     |     |     |    |     |     |     |     |     |     |     |     |    |  |  |  |  |     |     |     |     |     |     |     |    |   |  |  |  |  |  |  |  |  |  |  |     |     |     |     |     |     |     |     |     |     |     |     |    |    |    |  |  |  |  |  |     |     |     |   |     |    |  |  |  |  |  |  |  |  |     |     |   |     |     |     |     |     |     |     |     |     |     |  |  |  |  |  |  |     |  |     |     |     |     |     |     |    |    |  |  |  |  |  |  |  |     |     |     |     |     |     |     |     |     |     |     |     |    |    |    |  |  |  |  |  |  |  |  |     |     |     |   |     |   |  |  |  |  |  |     |  |  |     |     |     |     |     |     |     |     |    |     |  |  |  |  |  |  |  |  |  |  |     |     |     |     |     |     |     |    |   |  |  |  |  |     |     |     |     |     |     |     |     |     |     |     |     |    |    |    |  |  |  |  |  |  |  |  |  |  |  |  |     |     |   |     |   |  |  |  |  |  |     |     |     |     |     |     |     |     |    |     |  |  |  |  |  |  |  |  |  |  |  |  |  |  |     |     |     |     |    |     |  |  |  |  |  |     |     |     |     |     |     |     |     |     |     |    |    |    |  |  |  |  |  |  |  |  |  |  |  |     |     |     |     |     |     |    |    |   |  |     |     |     |     |     |     |     |     |     |    |     |  |  |  |  |  |  |  |  |  |  |  |  |  |  |  |  |  |  |     |     |   |     |     |  |  |  |     |     |     |     |     |     |     |     |     |    |    |    |  |  |  |  |  |  |  |  |  |  |  |  |  |  |  |     |     |     |     |     |   |    |     |     |     |     |     |     |     |     |    |     |  |  |  |  |  |  |  |  |  |  |  |  |  |  |  |  |  |  |  |     |     |     |     |    |    |     |     |     |     |     |     |     |     |     |     |    |    |   |  |  |  |  |  |  |  |  |  |  |  |  |  |  |  |  |  |  |     |     |   |     |     |     |    |     |     |     |     |     |     |     |  |  |  |  |  |  |  |  |  |  |  |  |  |  |  |  |  |  |  |  |  |  |  |     |     |     |     |     |     |     |     |     |     |     |     |    |    |   |  |  |  |  |  |  |  |  |  |  |  |  |  |  |  |  |  |  |  |  |     |     |     |     |     |     |   |     |     |     |     |     |  |  |  |  |  |  |  |  |  |  |  |  |  |  |  |  |  |  |  |  |  |  |  |  |  |  |     |     |     |    |     |     |     |     |     |    |    |    |  |  |  |  |  |  |  |  |  |  |  |  |  |  |  |  |  |  |  |  |  |  |     |     |   |    |   |     |     |     |     |     |  |  |  |  |  |  |  |  |  |  |  |  |  |  |  |  |  |  |  |  |  |  |  |  |  |  |     |  |  |     |     |     |     |     |     |    |    |    |  |  |  |  |  |  |  |  |  |  |  |  |  |  |  |  |  |  |  |  |  |  |     |     |   |    |     |     |   |     |     |     |     |     |   |    |   |  |  |  |  |  |  |  |  |  |  |  |  |  |  |  |  |  |  |  |  |  |     |  |  |  |     |  |     |     |     |    |     |    |  |  |  |  |  |  |  |  |  |  |  |  |  |  |  |  |  |  |  |  |  |  |     |     |   |    |   |  |  |     |     |     |     |     |     |    |    |    |  |  |  |  |  |  |  |  |  |  |  |  |  |  |  |  |  |  |  |  |     |  |  |  |  |  |     |     |     |   |     |     |  |  |  |  |  |  |  |  |  |  |  |  |  |  |  |  |  |  |  |  |  |  |     |     |   |    |    |  |  |  |  |     |     |     |     |    |     |     |   |    |    |  |  |  |  |  |  |  |  |  |  |  |  |  |  |  |  |  |     |  |  |  |  |  |  |     |  |     |     |     |     |     |     |   |    |    |  |  |  |  |  |  |  |  |  |  |  |  |  |  |  |  |     |     |   |    |   |  |  |  |     |     |     |     |     |    |     |     |  |     |     |   |    |   |  |  |  |  |  |  |  |  |  |  |  |  |  |  |     |  |  |  |  |  |  |  |  |  |     |     |     |     |     |   |    |     |   |    |    |  |  |  |  |  |  |  |  |  |  |  |  |  |     |  |  |  |  |  |  |  |  |     |  |     |     |   |    |     |  |     |     |  |  |  |  |  |  |  |  |  |  |  |  |  |  |  |  |     |     |   |    |    |  |  |  |  |  |     |     |     |   |     |     |   |    |    |  |     |     |   |    |    |  |  |  |  |  |  |  |  |  |  |  |     |  |  |  |  |  |  |  |  |     |  |  |  |  |     |  |  |  |  |  |     |  |  |  |  |  |  |  |  |  |  |  |  |  |     |  |  |  |  |  |  |  |  |  |  |  |  |  |     |     |   |    |    |  |     |  |  |     |     |   |    |    |  |  |  |  |  |  |     |     |     |   |    |    |  |  |  |  |  |  |  |  |  |  |     |  |     |     |   |    |   |     |     |     |   |    |    |  |  |  |  |  |  |  |  |     |  |  |  |  |  |  |  |  |  |  |  |     |     |     |   |    |     |  |  |  |     |  |     |  |  |  |  |  |  |  |  |  |  |     |     |   |    |    |  |  |  |  |  |  |  |  |  |  |     |  |     |     |   |    |    |  |  |  |  |     |     |   |    |    |  |  |  |  |  |     |  |  |  |  |  |  |  |  |  |  |  |  |     |  |  |  |     |  |  |  |  |  |  |  |  |     |  |  |  |  |  |  |  |     |     |   |    |   |  |  |  |  |  |  |  |  |  |     |     |     |     |     |   |    |    |  |  |  |     |  |  |  |     |     |   |    |   |  |  |     |  |  |  |  |  |  |  |  |  |  |  |  |  |  |  |  |     |  |  |  |  |  |  |  |  |  |  |  |     |  |  |  |  |     |  |  |  |  |  |  |  |  |  |  |  |  |  |  |  |     |     |     |   |    |    |  |  |  |  |  |  |  |     |  |  |  |  |  |     |     |   |    |   |  |  |  |  |  |  |  |  |  |  |  |  |  |     |  |  |  |  |  |  |  |  |  |  |  |  |  |     |     |   |    |     |  |  |  |  |  |  |  |  |  |  |  |  |  |  |     |  |  |  |  |  |  |  |  |  |  |  |  |  |  |  |  |     |  |     |     |   |    |    |  |  |  |  |  |  |  |  |  |  |  |  |  |  |  |  |  |  |  |  |  |  |  |  |  |  |  |  |  |  |     |     |   |    |    |  |  |  |  |  |  |  |  |  |  |  |  |  |  |  |  |  |  |  |  |  |  |  |  |  |  |  |  |  |     |
| 065        | 259       | F   | 43  | 9                         |        |            |       |        |          |          |        |          |            |    |            |       |        |          |          |        |          |        |    |            |       |        |       |        |                                |          |          |        |          |        |    | 322 |     |     |  |  |  |  |  |  |  |  |  |  |  |  |  |  |  |  |  |  |  |  |  |  |  |  |  |  |  |  |  |  |     | 070 | 063 | F   | 48  | 4   |    |    |    |  |  |  |  |  |  |  |  |  |  |  |  |  |  |  |  |  |  |  |  |  |  |  |  |  |  |  |     | 286 |     |     |     |     |     |    |    |  |  |  |  |  |  |  |  |  |  |  |  |  |  |  |  |  |  |  |  |  |  |  |  |  |     | 072 | 025 | F   | 80 | 7   |     |     |     |    |    |    |  |  |  |  |  |  |  |  |  |  |  |  |  |  |  |  |  |  |  |  |  |  |  |  |  | 342 |     |     |     |     |     |    |    |     |     |  |  |  |  |  |  |  |  |  |  |  |  |  |  |  |  |  |  |  |  |  |  |  |     | 076 | 038 | F   | 52 | 7   |     |     |     |     |     |     |    |    |    |  |  |  |  |  |  |  |  |  |  |  |  |  |  |  |  |  |  |  |  |  |  | 098 |     |     |     |     |    |     |     |     |     |    |     |     |  |  |  |  |  |  |  |  |  |  |  |  |  |  |  |  |  |  |  |  |  | 078 | 262 | F   | 85 | 14  |     |     |     |     |    |    |     |     |     |   |    |    |  |  |  |  |  |  |  |  |  |  |  |  |  |  |  |  |  |  |  | 291 |     |     |     |     |     |     |     |    |     |     |     |     |    |    |     |  |  |  |  |  |  |  |  |  |  |  |  |  |  |  |  |  |  | 079 | 314 | F   | 88 | 8   |     |     |     |     |    |    |    |  |  |  |     |     |   |    |   |  |  |  |  |  |  |  |  |  |  |  |  |  |  |  |  | 335 |     |     |     |     |     |     |     |    |  |  |  |  |     |     |     |     |    |     |    |  |  |  |  |  |  |  |  |  |  |  |  |  |  |     | 468 |   |    |     |     |     |     |     |     |    |    |    |     |     |     |   |    |     |     |     |    |   |  |  |  |  |  |  |  |  |  |  |  |  |     |     |     | 080 | 054 | F   | 71  | 10  |     |     |     |   |    |   |  |  |     |  |     |     |     |   |     |    |  |  |  |  |  |  |  |  |  |  |  |     |     |     |    | 089 |     |     |     |     |     |     |     |    |  |  |  |  |     |     |     |     |     |     |     |    |   |  |  |  |  |  |  |  |  |  |  |     |     |     | 131 |     |     |     |     |     |     |     |     |    |    |    |  |  |  |  |  |     |     |     |   |     |    |  |  |  |  |  |  |  |  |     |     |   |     |     | yes | 083 | 020 | M   | 67  | 18  |     |     |  |  |  |  |  |  |     |  |     |     |     |     |     |     |    |    |  |  |  |  |  |  |  |     |     |     |     |     |     | 088 |     |     |     |     |     |    |    |    |  |  |  |  |  |  |  |  |     |     |     |   |     |   |  |  |  |  |  |     |  |  |     |     |     | 084 | 012 | M   | 45  | 23  |    |     |  |  |  |  |  |  |  |  |  |  |     |     |     |     |     |     |     |    |   |  |  |  |  |     |     |     |     |     |     | 021 |     |     |     |     |     |    |    |    |  |  |  |  |  |  |  |  |  |  |  |  |     |     |   |     |   |  |  |  |  |  |     |     |     | 142 | 399 | M   | 73  | 7   |    |     |  |  |  |  |  |  |  |  |  |  |  |  |  |  |     |     |     |     |    |     |  |  |  |  |  |     |     |     |     | 427 |     |     |     |     |     |    |    |    |  |  |  |  |  |  |  |  |  |  |  |     |     |     |     |     |     |    |    |   |  |     |     |     |     |     | 505 |     |     |     |    |     |  |  |  |  |  |  |  |  |  |  |  |  |  |  |  |  |  |  |     |     |   |     |     |  |  |  |     |     |     |     |     | 153 | 444 | F   | 85  | 9  |    |    |  |  |  |  |  |  |  |  |  |  |  |  |  |  |  |     |     |     |     |     |   |    |     |     |     |     |     |     |     | 511 |    |     |  |  |  |  |  |  |  |  |  |  |  |  |  |  |  |  |  |  |  |     |     |     |     |    |    |     |     |     |     |     |     | 163 | 361 | F   | 47  | 23 |    |   |  |  |  |  |  |  |  |  |  |  |  |  |  |  |  |  |  |  |     |     |   |     |     |     |    |     |     |     |     | 424 |     |     |  |  |  |  |  |  |  |  |  |  |  |  |  |  |  |  |  |  |  |  |  |  |  |     |     |     |     |     |     |     | yes |     |     |     |     |    |    |   |  |  |  |  |  |  |  |  |  |  |  |  |  |  |  |  |  |  |  |  |     |     |     |     |     |     |   |     |     |     |     |     |  |  |  |  |  |  |  |  |  |  |  |  |  |  |  |  |  |  |  |  |  |  |  |  |  |  |     |     |     |    |     |     |     |     |     |    |    |    |  |  |  |  |  |  |  |  |  |  |  |  |  |  |  |  |  |  |  |  |  |  |     |     |   |    |   |     |     |     |     |     |  |  |  |  |  |  |  |  |  |  |  |  |  |  |  |  |  |  |  |  |  |  |  |  |  |  |     |  |  |     |     |     |     |     |     |    |    |    |  |  |  |  |  |  |  |  |  |  |  |  |  |  |  |  |  |  |  |  |  |  |     |     |   |    |     |     |   |     |     |     |     |     |   |    |   |  |  |  |  |  |  |  |  |  |  |  |  |  |  |  |  |  |  |  |  |  |     |  |  |  |     |  |     |     |     |    |     |    |  |  |  |  |  |  |  |  |  |  |  |  |  |  |  |  |  |  |  |  |  |  |     |     |   |    |   |  |  |     |     |     |     |     |     |    |    |    |  |  |  |  |  |  |  |  |  |  |  |  |  |  |  |  |  |  |  |  |     |  |  |  |  |  |     |     |     |   |     |     |  |  |  |  |  |  |  |  |  |  |  |  |  |  |  |  |  |  |  |  |  |  |     |     |   |    |    |  |  |  |  |     |     |     |     |    |     |     |   |    |    |  |  |  |  |  |  |  |  |  |  |  |  |  |  |  |  |  |     |  |  |  |  |  |  |     |  |     |     |     |     |     |     |   |    |    |  |  |  |  |  |  |  |  |  |  |  |  |  |  |  |  |     |     |   |    |   |  |  |  |     |     |     |     |     |    |     |     |  |     |     |   |    |   |  |  |  |  |  |  |  |  |  |  |  |  |  |  |     |  |  |  |  |  |  |  |  |  |     |     |     |     |     |   |    |     |   |    |    |  |  |  |  |  |  |  |  |  |  |  |  |  |     |  |  |  |  |  |  |  |  |     |  |     |     |   |    |     |  |     |     |  |  |  |  |  |  |  |  |  |  |  |  |  |  |  |  |     |     |   |    |    |  |  |  |  |  |     |     |     |   |     |     |   |    |    |  |     |     |   |    |    |  |  |  |  |  |  |  |  |  |  |  |     |  |  |  |  |  |  |  |  |     |  |  |  |  |     |  |  |  |  |  |     |  |  |  |  |  |  |  |  |  |  |  |  |  |     |  |  |  |  |  |  |  |  |  |  |  |  |  |     |     |   |    |    |  |     |  |  |     |     |   |    |    |  |  |  |  |  |  |     |     |     |   |    |    |  |  |  |  |  |  |  |  |  |  |     |  |     |     |   |    |   |     |     |     |   |    |    |  |  |  |  |  |  |  |  |     |  |  |  |  |  |  |  |  |  |  |  |     |     |     |   |    |     |  |  |  |     |  |     |  |  |  |  |  |  |  |  |  |  |     |     |   |    |    |  |  |  |  |  |  |  |  |  |  |     |  |     |     |   |    |    |  |  |  |  |     |     |   |    |    |  |  |  |  |  |     |  |  |  |  |  |  |  |  |  |  |  |  |     |  |  |  |     |  |  |  |  |  |  |  |  |     |  |  |  |  |  |  |  |     |     |   |    |   |  |  |  |  |  |  |  |  |  |     |     |     |     |     |   |    |    |  |  |  |     |  |  |  |     |     |   |    |   |  |  |     |  |  |  |  |  |  |  |  |  |  |  |  |  |  |  |  |     |  |  |  |  |  |  |  |  |  |  |  |     |  |  |  |  |     |  |  |  |  |  |  |  |  |  |  |  |  |  |  |  |     |     |     |   |    |    |  |  |  |  |  |  |  |     |  |  |  |  |  |     |     |   |    |   |  |  |  |  |  |  |  |  |  |  |  |  |  |     |  |  |  |  |  |  |  |  |  |  |  |  |  |     |     |   |    |     |  |  |  |  |  |  |  |  |  |  |  |  |  |  |     |  |  |  |  |  |  |  |  |  |  |  |  |  |  |  |  |     |  |     |     |   |    |    |  |  |  |  |  |  |  |  |  |  |  |  |  |  |  |  |  |  |  |  |  |  |  |  |  |  |  |  |  |  |     |     |   |    |    |  |  |  |  |  |  |  |  |  |  |  |  |  |  |  |  |  |  |  |  |  |  |  |  |  |  |  |  |  |     |
|            | 322       |     |     |                           |        |            |       |        |          |          |        |          |            |    |            |       |        |          |          |        |          |        |    |            |       |        |       |        |                                |          |          |        |          |        |    |     |     |     |  |  |  |  |  |  |  |  |  |  |  |  |  |  |  |  |  |  |  |  |  |  |  |  |  |  |  |  |  |  |     |     |     |     |     |     |    |    |    |  |  |  |  |  |  |  |  |  |  |  |  |  |  |  |  |  |  |  |  |  |  |  |  |  |  |  |     |     |     |     |     |     |     |    |    |  |  |  |  |  |  |  |  |  |  |  |  |  |  |  |  |  |  |  |  |  |  |  |  |  |     |     |     |     |    |     |     |     |     |    |    |    |  |  |  |  |  |  |  |  |  |  |  |  |  |  |  |  |  |  |  |  |  |  |  |  |  |     |     |     |     |     |     |    |    |     |     |  |  |  |  |  |  |  |  |  |  |  |  |  |  |  |  |  |  |  |  |  |  |  |     |     |     |     |    |     |     |     |     |     |     |     |    |    |    |  |  |  |  |  |  |  |  |  |  |  |  |  |  |  |  |  |  |  |  |  |  |     |     |     |     |     |    |     |     |     |     |    |     |     |  |  |  |  |  |  |  |  |  |  |  |  |  |  |  |  |  |  |  |  |  |     |     |     |    |     |     |     |     |     |    |    |     |     |     |   |    |    |  |  |  |  |  |  |  |  |  |  |  |  |  |  |  |  |  |  |  |     |     |     |     |     |     |     |     |    |     |     |     |     |    |    |     |  |  |  |  |  |  |  |  |  |  |  |  |  |  |  |  |  |  |     |     |     |    |     |     |     |     |     |    |    |    |  |  |  |     |     |   |    |   |  |  |  |  |  |  |  |  |  |  |  |  |  |  |  |  |     |     |     |     |     |     |     |     |    |  |  |  |  |     |     |     |     |    |     |    |  |  |  |  |  |  |  |  |  |  |  |  |  |  |     |     |   |    |     |     |     |     |     |     |    |    |    |     |     |     |   |    |     |     |     |    |   |  |  |  |  |  |  |  |  |  |  |  |  |     |     |     |     |     |     |     |     |     |     |     |   |    |   |  |  |     |  |     |     |     |   |     |    |  |  |  |  |  |  |  |  |  |  |  |     |     |     |    |     |     |     |     |     |     |     |     |    |  |  |  |  |     |     |     |     |     |     |     |    |   |  |  |  |  |  |  |  |  |  |  |     |     |     |     |     |     |     |     |     |     |     |     |    |    |    |  |  |  |  |  |     |     |     |   |     |    |  |  |  |  |  |  |  |  |     |     |   |     |     |     |     |     |     |     |     |     |     |  |  |  |  |  |  |     |  |     |     |     |     |     |     |    |    |  |  |  |  |  |  |  |     |     |     |     |     |     |     |     |     |     |     |     |    |    |    |  |  |  |  |  |  |  |  |     |     |     |   |     |   |  |  |  |  |  |     |  |  |     |     |     |     |     |     |     |     |    |     |  |  |  |  |  |  |  |  |  |  |     |     |     |     |     |     |     |    |   |  |  |  |  |     |     |     |     |     |     |     |     |     |     |     |     |    |    |    |  |  |  |  |  |  |  |  |  |  |  |  |     |     |   |     |   |  |  |  |  |  |     |     |     |     |     |     |     |     |    |     |  |  |  |  |  |  |  |  |  |  |  |  |  |  |     |     |     |     |    |     |  |  |  |  |  |     |     |     |     |     |     |     |     |     |     |    |    |    |  |  |  |  |  |  |  |  |  |  |  |     |     |     |     |     |     |    |    |   |  |     |     |     |     |     |     |     |     |     |    |     |  |  |  |  |  |  |  |  |  |  |  |  |  |  |  |  |  |  |     |     |   |     |     |  |  |  |     |     |     |     |     |     |     |     |     |    |    |    |  |  |  |  |  |  |  |  |  |  |  |  |  |  |  |     |     |     |     |     |   |    |     |     |     |     |     |     |     |     |    |     |  |  |  |  |  |  |  |  |  |  |  |  |  |  |  |  |  |  |  |     |     |     |     |    |    |     |     |     |     |     |     |     |     |     |     |    |    |   |  |  |  |  |  |  |  |  |  |  |  |  |  |  |  |  |  |  |     |     |   |     |     |     |    |     |     |     |     |     |     |     |  |  |  |  |  |  |  |  |  |  |  |  |  |  |  |  |  |  |  |  |  |  |  |     |     |     |     |     |     |     |     |     |     |     |     |    |    |   |  |  |  |  |  |  |  |  |  |  |  |  |  |  |  |  |  |  |  |  |     |     |     |     |     |     |   |     |     |     |     |     |  |  |  |  |  |  |  |  |  |  |  |  |  |  |  |  |  |  |  |  |  |  |  |  |  |  |     |     |     |    |     |     |     |     |     |    |    |    |  |  |  |  |  |  |  |  |  |  |  |  |  |  |  |  |  |  |  |  |  |  |     |     |   |    |   |     |     |     |     |     |  |  |  |  |  |  |  |  |  |  |  |  |  |  |  |  |  |  |  |  |  |  |  |  |  |  |     |  |  |     |     |     |     |     |     |    |    |    |  |  |  |  |  |  |  |  |  |  |  |  |  |  |  |  |  |  |  |  |  |  |     |     |   |    |     |     |   |     |     |     |     |     |   |    |   |  |  |  |  |  |  |  |  |  |  |  |  |  |  |  |  |  |  |  |  |  |     |  |  |  |     |  |     |     |     |    |     |    |  |  |  |  |  |  |  |  |  |  |  |  |  |  |  |  |  |  |  |  |  |  |     |     |   |    |   |  |  |     |     |     |     |     |     |    |    |    |  |  |  |  |  |  |  |  |  |  |  |  |  |  |  |  |  |  |  |  |     |  |  |  |  |  |     |     |     |   |     |     |  |  |  |  |  |  |  |  |  |  |  |  |  |  |  |  |  |  |  |  |  |  |     |     |   |    |    |  |  |  |  |     |     |     |     |    |     |     |   |    |    |  |  |  |  |  |  |  |  |  |  |  |  |  |  |  |  |  |     |  |  |  |  |  |  |     |  |     |     |     |     |     |     |   |    |    |  |  |  |  |  |  |  |  |  |  |  |  |  |  |  |  |     |     |   |    |   |  |  |  |     |     |     |     |     |    |     |     |  |     |     |   |    |   |  |  |  |  |  |  |  |  |  |  |  |  |  |  |     |  |  |  |  |  |  |  |  |  |     |     |     |     |     |   |    |     |   |    |    |  |  |  |  |  |  |  |  |  |  |  |  |  |     |  |  |  |  |  |  |  |  |     |  |     |     |   |    |     |  |     |     |  |  |  |  |  |  |  |  |  |  |  |  |  |  |  |  |     |     |   |    |    |  |  |  |  |  |     |     |     |   |     |     |   |    |    |  |     |     |   |    |    |  |  |  |  |  |  |  |  |  |  |  |     |  |  |  |  |  |  |  |  |     |  |  |  |  |     |  |  |  |  |  |     |  |  |  |  |  |  |  |  |  |  |  |  |  |     |  |  |  |  |  |  |  |  |  |  |  |  |  |     |     |   |    |    |  |     |  |  |     |     |   |    |    |  |  |  |  |  |  |     |     |     |   |    |    |  |  |  |  |  |  |  |  |  |  |     |  |     |     |   |    |   |     |     |     |   |    |    |  |  |  |  |  |  |  |  |     |  |  |  |  |  |  |  |  |  |  |  |     |     |     |   |    |     |  |  |  |     |  |     |  |  |  |  |  |  |  |  |  |  |     |     |   |    |    |  |  |  |  |  |  |  |  |  |  |     |  |     |     |   |    |    |  |  |  |  |     |     |   |    |    |  |  |  |  |  |     |  |  |  |  |  |  |  |  |  |  |  |  |     |  |  |  |     |  |  |  |  |  |  |  |  |     |  |  |  |  |  |  |  |     |     |   |    |   |  |  |  |  |  |  |  |  |  |     |     |     |     |     |   |    |    |  |  |  |     |  |  |  |     |     |   |    |   |  |  |     |  |  |  |  |  |  |  |  |  |  |  |  |  |  |  |  |     |  |  |  |  |  |  |  |  |  |  |  |     |  |  |  |  |     |  |  |  |  |  |  |  |  |  |  |  |  |  |  |  |     |     |     |   |    |    |  |  |  |  |  |  |  |     |  |  |  |  |  |     |     |   |    |   |  |  |  |  |  |  |  |  |  |  |  |  |  |     |  |  |  |  |  |  |  |  |  |  |  |  |  |     |     |   |    |     |  |  |  |  |  |  |  |  |  |  |  |  |  |  |     |  |  |  |  |  |  |  |  |  |  |  |  |  |  |  |  |     |  |     |     |   |    |    |  |  |  |  |  |  |  |  |  |  |  |  |  |  |  |  |  |  |  |  |  |  |  |  |  |  |  |  |  |  |     |     |   |    |    |  |  |  |  |  |  |  |  |  |  |  |  |  |  |  |  |  |  |  |  |  |  |  |  |  |  |  |  |  |     |
| 070        | 063       | F   | 48  | 4                         |        |            |       |        |          |          |        |          |            |    |            |       |        |          |          |        |          |        |    |            |       |        |       |        |                                |          |          |        |          |        |    | 286 |     |     |  |  |  |  |  |  |  |  |  |  |  |  |  |  |  |  |  |  |  |  |  |  |  |  |  |  |  |  |  |  |     | 072 | 025 | F   | 80  | 7   |    |    |    |  |  |  |  |  |  |  |  |  |  |  |  |  |  |  |  |  |  |  |  |  |  |  |  |  |  |  |     | 342 |     |     |     |     |     |    |    |  |  |  |  |  |  |  |  |  |  |  |  |  |  |  |  |  |  |  |  |  |  |  |  |  |     | 076 | 038 | F   | 52 | 7   |     |     |     |    |    |    |  |  |  |  |  |  |  |  |  |  |  |  |  |  |  |  |  |  |  |  |  |  |  |  |  | 098 |     |     |     |     |     |    |    |     |     |  |  |  |  |  |  |  |  |  |  |  |  |  |  |  |  |  |  |  |  |  |  |  |     | 078 | 262 | F   | 85 | 14  |     |     |     |     |     |     |    |    |    |  |  |  |  |  |  |  |  |  |  |  |  |  |  |  |  |  |  |  |  |  |  | 291 |     |     |     |     |    |     |     |     |     |    |     |     |  |  |  |  |  |  |  |  |  |  |  |  |  |  |  |  |  |  |  |  |  | 079 | 314 | F   | 88 | 8   |     |     |     |     |    |    |     |     |     |   |    |    |  |  |  |  |  |  |  |  |  |  |  |  |  |  |  |  |  |  |  | 335 |     |     |     |     |     |     |     |    |     |     |     |     |    |    |     |  |  |  |  |  |  |  |  |  |  |  |  |  |  |  |  |  |  |     | 468 |     |    |     |     |     |     |     |    |    |    |  |  |  |     |     |   |    |   |  |  |  |  |  |  |  |  |  |  |  |  |  |  |  |  |     |     | 080 | 054 | F   | 71  | 10  |     |    |  |  |  |  |     |     |     |     |    |     |    |  |  |  |  |  |  |  |  |  |  |  |  |  |  |     |     |   |    | 089 |     |     |     |     |     |    |    |    |     |     |     |   |    |     |     |     |    |   |  |  |  |  |  |  |  |  |  |  |  |  |     |     |     |     | 131 |     |     |     |     |     |     |   |    |   |  |  |     |  |     |     |     |   |     |    |  |  |  |  |  |  |  |  |  |  |  |     |     |     |    |     | yes | 083 | 020 | M   | 67  | 18  |     |    |  |  |  |  |     |     |     |     |     |     |     |    |   |  |  |  |  |  |  |  |  |  |  |     |     |     |     |     |     | 088 |     |     |     |     |     |    |    |    |  |  |  |  |  |     |     |     |   |     |    |  |  |  |  |  |  |  |  |     |     |   |     |     |     | 084 | 012 | M   | 45  | 23  |     |     |  |  |  |  |  |  |     |  |     |     |     |     |     |     |    |    |  |  |  |  |  |  |  |     |     |     |     |     |     | 021 |     |     |     |     |     |    |    |    |  |  |  |  |  |  |  |  |     |     |     |   |     |   |  |  |  |  |  |     |  |  |     |     |     | 142 | 399 | M   | 73  | 7   |    |     |  |  |  |  |  |  |  |  |  |  |     |     |     |     |     |     |     |    |   |  |  |  |  |     |     |     |     |     |     | 427 |     |     |     |     |     |    |    |    |  |  |  |  |  |  |  |  |  |  |  |  |     |     |   |     |   |  |  |  |  |  |     |     |     |     | 505 |     |     |     |    |     |  |  |  |  |  |  |  |  |  |  |  |  |  |  |     |     |     |     |    |     |  |  |  |  |  |     |     |     |     |     |     | 153 | 444 | F   | 85  | 9  |    |    |  |  |  |  |  |  |  |  |  |  |  |     |     |     |     |     |     |    |    |   |  |     |     |     |     |     |     |     |     | 511 |    |     |  |  |  |  |  |  |  |  |  |  |  |  |  |  |  |  |  |  |     |     |   |     |     |  |  |  |     |     |     |     |     | 163 | 361 | F   | 47  | 23 |    |    |  |  |  |  |  |  |  |  |  |  |  |  |  |  |  |     |     |     |     |     |   |    |     |     |     |     |     |     |     | 424 |    |     |  |  |  |  |  |  |  |  |  |  |  |  |  |  |  |  |  |  |  |     |     |     |     |    |    |     |     |     |     |     | yes |     |     |     |     |    |    |   |  |  |  |  |  |  |  |  |  |  |  |  |  |  |  |  |  |  |     |     |   |     |     |     |    |     |     |     |     |     |     |     |  |  |  |  |  |  |  |  |  |  |  |  |  |  |  |  |  |  |  |  |  |  |  |     |     |     |     |     |     |     |     |     |     |     |     |    |    |   |  |  |  |  |  |  |  |  |  |  |  |  |  |  |  |  |  |  |  |  |     |     |     |     |     |     |   |     |     |     |     |     |  |  |  |  |  |  |  |  |  |  |  |  |  |  |  |  |  |  |  |  |  |  |  |  |  |  |     |     |     |    |     |     |     |     |     |    |    |    |  |  |  |  |  |  |  |  |  |  |  |  |  |  |  |  |  |  |  |  |  |  |     |     |   |    |   |     |     |     |     |     |  |  |  |  |  |  |  |  |  |  |  |  |  |  |  |  |  |  |  |  |  |  |  |  |  |  |     |  |  |     |     |     |     |     |     |    |    |    |  |  |  |  |  |  |  |  |  |  |  |  |  |  |  |  |  |  |  |  |  |  |     |     |   |    |     |     |   |     |     |     |     |     |   |    |   |  |  |  |  |  |  |  |  |  |  |  |  |  |  |  |  |  |  |  |  |  |     |  |  |  |     |  |     |     |     |    |     |    |  |  |  |  |  |  |  |  |  |  |  |  |  |  |  |  |  |  |  |  |  |  |     |     |   |    |   |  |  |     |     |     |     |     |     |    |    |    |  |  |  |  |  |  |  |  |  |  |  |  |  |  |  |  |  |  |  |  |     |  |  |  |  |  |     |     |     |   |     |     |  |  |  |  |  |  |  |  |  |  |  |  |  |  |  |  |  |  |  |  |  |  |     |     |   |    |    |  |  |  |  |     |     |     |     |    |     |     |   |    |    |  |  |  |  |  |  |  |  |  |  |  |  |  |  |  |  |  |     |  |  |  |  |  |  |     |  |     |     |     |     |     |     |   |    |    |  |  |  |  |  |  |  |  |  |  |  |  |  |  |  |  |     |     |   |    |   |  |  |  |     |     |     |     |     |    |     |     |  |     |     |   |    |   |  |  |  |  |  |  |  |  |  |  |  |  |  |  |     |  |  |  |  |  |  |  |  |  |     |     |     |     |     |   |    |     |   |    |    |  |  |  |  |  |  |  |  |  |  |  |  |  |     |  |  |  |  |  |  |  |  |     |  |     |     |   |    |     |  |     |     |  |  |  |  |  |  |  |  |  |  |  |  |  |  |  |  |     |     |   |    |    |  |  |  |  |  |     |     |     |   |     |     |   |    |    |  |     |     |   |    |    |  |  |  |  |  |  |  |  |  |  |  |     |  |  |  |  |  |  |  |  |     |  |  |  |  |     |  |  |  |  |  |     |  |  |  |  |  |  |  |  |  |  |  |  |  |     |  |  |  |  |  |  |  |  |  |  |  |  |  |     |     |   |    |    |  |     |  |  |     |     |   |    |    |  |  |  |  |  |  |     |     |     |   |    |    |  |  |  |  |  |  |  |  |  |  |     |  |     |     |   |    |   |     |     |     |   |    |    |  |  |  |  |  |  |  |  |     |  |  |  |  |  |  |  |  |  |  |  |     |     |     |   |    |     |  |  |  |     |  |     |  |  |  |  |  |  |  |  |  |  |     |     |   |    |    |  |  |  |  |  |  |  |  |  |  |     |  |     |     |   |    |    |  |  |  |  |     |     |   |    |    |  |  |  |  |  |     |  |  |  |  |  |  |  |  |  |  |  |  |     |  |  |  |     |  |  |  |  |  |  |  |  |     |  |  |  |  |  |  |  |     |     |   |    |   |  |  |  |  |  |  |  |  |  |     |     |     |     |     |   |    |    |  |  |  |     |  |  |  |     |     |   |    |   |  |  |     |  |  |  |  |  |  |  |  |  |  |  |  |  |  |  |  |     |  |  |  |  |  |  |  |  |  |  |  |     |  |  |  |  |     |  |  |  |  |  |  |  |  |  |  |  |  |  |  |  |     |     |     |   |    |    |  |  |  |  |  |  |  |     |  |  |  |  |  |     |     |   |    |   |  |  |  |  |  |  |  |  |  |  |  |  |  |     |  |  |  |  |  |  |  |  |  |  |  |  |  |     |     |   |    |     |  |  |  |  |  |  |  |  |  |  |  |  |  |  |     |  |  |  |  |  |  |  |  |  |  |  |  |  |  |  |  |     |  |     |     |   |    |    |  |  |  |  |  |  |  |  |  |  |  |  |  |  |  |  |  |  |  |  |  |  |  |  |  |  |  |  |  |  |     |     |   |    |    |  |  |  |  |  |  |  |  |  |  |  |  |  |  |  |  |  |  |  |  |  |  |  |  |  |  |  |  |  |     |
|            | 286       |     |     |                           |        |            |       |        |          |          |        |          |            |    |            |       |        |          |          |        |          |        |    |            |       |        |       |        |                                |          |          |        |          |        |    |     |     |     |  |  |  |  |  |  |  |  |  |  |  |  |  |  |  |  |  |  |  |  |  |  |  |  |  |  |  |  |  |  |     |     |     |     |     |     |    |    |    |  |  |  |  |  |  |  |  |  |  |  |  |  |  |  |  |  |  |  |  |  |  |  |  |  |  |  |     |     |     |     |     |     |     |    |    |  |  |  |  |  |  |  |  |  |  |  |  |  |  |  |  |  |  |  |  |  |  |  |  |  |     |     |     |     |    |     |     |     |     |    |    |    |  |  |  |  |  |  |  |  |  |  |  |  |  |  |  |  |  |  |  |  |  |  |  |  |  |     |     |     |     |     |     |    |    |     |     |  |  |  |  |  |  |  |  |  |  |  |  |  |  |  |  |  |  |  |  |  |  |  |     |     |     |     |    |     |     |     |     |     |     |     |    |    |    |  |  |  |  |  |  |  |  |  |  |  |  |  |  |  |  |  |  |  |  |  |  |     |     |     |     |     |    |     |     |     |     |    |     |     |  |  |  |  |  |  |  |  |  |  |  |  |  |  |  |  |  |  |  |  |  |     |     |     |    |     |     |     |     |     |    |    |     |     |     |   |    |    |  |  |  |  |  |  |  |  |  |  |  |  |  |  |  |  |  |  |  |     |     |     |     |     |     |     |     |    |     |     |     |     |    |    |     |  |  |  |  |  |  |  |  |  |  |  |  |  |  |  |  |  |  |     |     |     |    |     |     |     |     |     |    |    |    |  |  |  |     |     |   |    |   |  |  |  |  |  |  |  |  |  |  |  |  |  |  |  |  |     |     |     |     |     |     |     |     |    |  |  |  |  |     |     |     |     |    |     |    |  |  |  |  |  |  |  |  |  |  |  |  |  |  |     |     |   |    |     |     |     |     |     |     |    |    |    |     |     |     |   |    |     |     |     |    |   |  |  |  |  |  |  |  |  |  |  |  |  |     |     |     |     |     |     |     |     |     |     |     |   |    |   |  |  |     |  |     |     |     |   |     |    |  |  |  |  |  |  |  |  |  |  |  |     |     |     |    |     |     |     |     |     |     |     |     |    |  |  |  |  |     |     |     |     |     |     |     |    |   |  |  |  |  |  |  |  |  |  |  |     |     |     |     |     |     |     |     |     |     |     |     |    |    |    |  |  |  |  |  |     |     |     |   |     |    |  |  |  |  |  |  |  |  |     |     |   |     |     |     |     |     |     |     |     |     |     |  |  |  |  |  |  |     |  |     |     |     |     |     |     |    |    |  |  |  |  |  |  |  |     |     |     |     |     |     |     |     |     |     |     |     |    |    |    |  |  |  |  |  |  |  |  |     |     |     |   |     |   |  |  |  |  |  |     |  |  |     |     |     |     |     |     |     |     |    |     |  |  |  |  |  |  |  |  |  |  |     |     |     |     |     |     |     |    |   |  |  |  |  |     |     |     |     |     |     |     |     |     |     |     |     |    |    |    |  |  |  |  |  |  |  |  |  |  |  |  |     |     |   |     |   |  |  |  |  |  |     |     |     |     |     |     |     |     |    |     |  |  |  |  |  |  |  |  |  |  |  |  |  |  |     |     |     |     |    |     |  |  |  |  |  |     |     |     |     |     |     |     |     |     |     |    |    |    |  |  |  |  |  |  |  |  |  |  |  |     |     |     |     |     |     |    |    |   |  |     |     |     |     |     |     |     |     |     |    |     |  |  |  |  |  |  |  |  |  |  |  |  |  |  |  |  |  |  |     |     |   |     |     |  |  |  |     |     |     |     |     |     |     |     |     |    |    |    |  |  |  |  |  |  |  |  |  |  |  |  |  |  |  |     |     |     |     |     |   |    |     |     |     |     |     |     |     |     |    |     |  |  |  |  |  |  |  |  |  |  |  |  |  |  |  |  |  |  |  |     |     |     |     |    |    |     |     |     |     |     |     |     |     |     |     |    |    |   |  |  |  |  |  |  |  |  |  |  |  |  |  |  |  |  |  |  |     |     |   |     |     |     |    |     |     |     |     |     |     |     |  |  |  |  |  |  |  |  |  |  |  |  |  |  |  |  |  |  |  |  |  |  |  |     |     |     |     |     |     |     |     |     |     |     |     |    |    |   |  |  |  |  |  |  |  |  |  |  |  |  |  |  |  |  |  |  |  |  |     |     |     |     |     |     |   |     |     |     |     |     |  |  |  |  |  |  |  |  |  |  |  |  |  |  |  |  |  |  |  |  |  |  |  |  |  |  |     |     |     |    |     |     |     |     |     |    |    |    |  |  |  |  |  |  |  |  |  |  |  |  |  |  |  |  |  |  |  |  |  |  |     |     |   |    |   |     |     |     |     |     |  |  |  |  |  |  |  |  |  |  |  |  |  |  |  |  |  |  |  |  |  |  |  |  |  |  |     |  |  |     |     |     |     |     |     |    |    |    |  |  |  |  |  |  |  |  |  |  |  |  |  |  |  |  |  |  |  |  |  |  |     |     |   |    |     |     |   |     |     |     |     |     |   |    |   |  |  |  |  |  |  |  |  |  |  |  |  |  |  |  |  |  |  |  |  |  |     |  |  |  |     |  |     |     |     |    |     |    |  |  |  |  |  |  |  |  |  |  |  |  |  |  |  |  |  |  |  |  |  |  |     |     |   |    |   |  |  |     |     |     |     |     |     |    |    |    |  |  |  |  |  |  |  |  |  |  |  |  |  |  |  |  |  |  |  |  |     |  |  |  |  |  |     |     |     |   |     |     |  |  |  |  |  |  |  |  |  |  |  |  |  |  |  |  |  |  |  |  |  |  |     |     |   |    |    |  |  |  |  |     |     |     |     |    |     |     |   |    |    |  |  |  |  |  |  |  |  |  |  |  |  |  |  |  |  |  |     |  |  |  |  |  |  |     |  |     |     |     |     |     |     |   |    |    |  |  |  |  |  |  |  |  |  |  |  |  |  |  |  |  |     |     |   |    |   |  |  |  |     |     |     |     |     |    |     |     |  |     |     |   |    |   |  |  |  |  |  |  |  |  |  |  |  |  |  |  |     |  |  |  |  |  |  |  |  |  |     |     |     |     |     |   |    |     |   |    |    |  |  |  |  |  |  |  |  |  |  |  |  |  |     |  |  |  |  |  |  |  |  |     |  |     |     |   |    |     |  |     |     |  |  |  |  |  |  |  |  |  |  |  |  |  |  |  |  |     |     |   |    |    |  |  |  |  |  |     |     |     |   |     |     |   |    |    |  |     |     |   |    |    |  |  |  |  |  |  |  |  |  |  |  |     |  |  |  |  |  |  |  |  |     |  |  |  |  |     |  |  |  |  |  |     |  |  |  |  |  |  |  |  |  |  |  |  |  |     |  |  |  |  |  |  |  |  |  |  |  |  |  |     |     |   |    |    |  |     |  |  |     |     |   |    |    |  |  |  |  |  |  |     |     |     |   |    |    |  |  |  |  |  |  |  |  |  |  |     |  |     |     |   |    |   |     |     |     |   |    |    |  |  |  |  |  |  |  |  |     |  |  |  |  |  |  |  |  |  |  |  |     |     |     |   |    |     |  |  |  |     |  |     |  |  |  |  |  |  |  |  |  |  |     |     |   |    |    |  |  |  |  |  |  |  |  |  |  |     |  |     |     |   |    |    |  |  |  |  |     |     |   |    |    |  |  |  |  |  |     |  |  |  |  |  |  |  |  |  |  |  |  |     |  |  |  |     |  |  |  |  |  |  |  |  |     |  |  |  |  |  |  |  |     |     |   |    |   |  |  |  |  |  |  |  |  |  |     |     |     |     |     |   |    |    |  |  |  |     |  |  |  |     |     |   |    |   |  |  |     |  |  |  |  |  |  |  |  |  |  |  |  |  |  |  |  |     |  |  |  |  |  |  |  |  |  |  |  |     |  |  |  |  |     |  |  |  |  |  |  |  |  |  |  |  |  |  |  |  |     |     |     |   |    |    |  |  |  |  |  |  |  |     |  |  |  |  |  |     |     |   |    |   |  |  |  |  |  |  |  |  |  |  |  |  |  |     |  |  |  |  |  |  |  |  |  |  |  |  |  |     |     |   |    |     |  |  |  |  |  |  |  |  |  |  |  |  |  |  |     |  |  |  |  |  |  |  |  |  |  |  |  |  |  |  |  |     |  |     |     |   |    |    |  |  |  |  |  |  |  |  |  |  |  |  |  |  |  |  |  |  |  |  |  |  |  |  |  |  |  |  |  |  |     |     |   |    |    |  |  |  |  |  |  |  |  |  |  |  |  |  |  |  |  |  |  |  |  |  |  |  |  |  |  |  |  |  |     |
| 072        | 025       | F   | 80  | 7                         |        |            |       |        |          |          |        |          |            |    |            |       |        |          |          |        |          |        |    |            |       |        |       |        |                                |          |          |        |          |        |    | 342 |     |     |  |  |  |  |  |  |  |  |  |  |  |  |  |  |  |  |  |  |  |  |  |  |  |  |  |  |  |  |  |  |     | 076 | 038 | F   | 52  | 7   |    |    |    |  |  |  |  |  |  |  |  |  |  |  |  |  |  |  |  |  |  |  |  |  |  |  |  |  |  |  |     | 098 |     |     |     |     |     |    |    |  |  |  |  |  |  |  |  |  |  |  |  |  |  |  |  |  |  |  |  |  |  |  |  |  |     | 078 | 262 | F   | 85 | 14  |     |     |     |    |    |    |  |  |  |  |  |  |  |  |  |  |  |  |  |  |  |  |  |  |  |  |  |  |  |  |  | 291 |     |     |     |     |     |    |    |     |     |  |  |  |  |  |  |  |  |  |  |  |  |  |  |  |  |  |  |  |  |  |  |  |     | 079 | 314 | F   | 88 | 8   |     |     |     |     |     |     |    |    |    |  |  |  |  |  |  |  |  |  |  |  |  |  |  |  |  |  |  |  |  |  |  | 335 |     |     |     |     |    |     |     |     |     |    |     |     |  |  |  |  |  |  |  |  |  |  |  |  |  |  |  |  |  |  |  |  |  |     | 468 |     |    |     |     |     |     |     |    |    |     |     |     |   |    |    |  |  |  |  |  |  |  |  |  |  |  |  |  |  |  |  |  |  |  |     |     | 080 | 054 | F   | 71  | 10  |     |    |     |     |     |     |    |    |     |  |  |  |  |  |  |  |  |  |  |  |  |  |  |  |  |  |  |     |     |     |    | 089 |     |     |     |     |    |    |    |  |  |  |     |     |   |    |   |  |  |  |  |  |  |  |  |  |  |  |  |  |  |  |  |     |     |     | 131 |     |     |     |     |    |  |  |  |  |     |     |     |     |    |     |    |  |  |  |  |  |  |  |  |  |  |  |  |  |  |     |     |   |    |     | yes | 083 | 020 | M   | 67  | 18 |    |    |     |     |     |   |    |     |     |     |    |   |  |  |  |  |  |  |  |  |  |  |  |  |     |     |     |     |     |     |     | 088 |     |     |     |   |    |   |  |  |     |  |     |     |     |   |     |    |  |  |  |  |  |  |  |  |  |  |  |     |     |     |    |     |     | 084 | 012 | M   | 45  | 23  |     |    |  |  |  |  |     |     |     |     |     |     |     |    |   |  |  |  |  |  |  |  |  |  |  |     |     |     |     |     |     | 021 |     |     |     |     |     |    |    |    |  |  |  |  |  |     |     |     |   |     |    |  |  |  |  |  |  |  |  |     |     |   |     |     |     | 142 | 399 | M   | 73  | 7   |     |     |  |  |  |  |  |  |     |  |     |     |     |     |     |     |    |    |  |  |  |  |  |  |  |     |     |     |     |     |     | 427 |     |     |     |     |     |    |    |    |  |  |  |  |  |  |  |  |     |     |     |   |     |   |  |  |  |  |  |     |  |  |     |     |     |     | 505 |     |     |     |    |     |  |  |  |  |  |  |  |  |  |  |     |     |     |     |     |     |     |    |   |  |  |  |  |     |     |     |     |     |     |     |     | 153 | 444 | F   | 85  | 9  |    |    |  |  |  |  |  |  |  |  |  |  |  |  |     |     |   |     |   |  |  |  |  |  |     |     |     |     |     |     |     | 511 |    |     |  |  |  |  |  |  |  |  |  |  |  |  |  |  |     |     |     |     |    |     |  |  |  |  |  |     |     |     |     |     |     | 163 | 361 | F   | 47  | 23 |    |    |  |  |  |  |  |  |  |  |  |  |  |     |     |     |     |     |     |    |    |   |  |     |     |     |     |     |     |     |     | 424 |    |     |  |  |  |  |  |  |  |  |  |  |  |  |  |  |  |  |  |  |     |     |   |     |     |  |  |  |     |     |     |     | yes |     |     |     |     |    |    |    |  |  |  |  |  |  |  |  |  |  |  |  |  |  |  |     |     |     |     |     |   |    |     |     |     |     |     |     |     |     |    |     |  |  |  |  |  |  |  |  |  |  |  |  |  |  |  |  |  |  |  |     |     |     |     |    |    |     |     |     |     |     |     |     |     |     |     |    |    |   |  |  |  |  |  |  |  |  |  |  |  |  |  |  |  |  |  |  |     |     |   |     |     |     |    |     |     |     |     |     |     |     |  |  |  |  |  |  |  |  |  |  |  |  |  |  |  |  |  |  |  |  |  |  |  |     |     |     |     |     |     |     |     |     |     |     |     |    |    |   |  |  |  |  |  |  |  |  |  |  |  |  |  |  |  |  |  |  |  |  |     |     |     |     |     |     |   |     |     |     |     |     |  |  |  |  |  |  |  |  |  |  |  |  |  |  |  |  |  |  |  |  |  |  |  |  |  |  |     |     |     |    |     |     |     |     |     |    |    |    |  |  |  |  |  |  |  |  |  |  |  |  |  |  |  |  |  |  |  |  |  |  |     |     |   |    |   |     |     |     |     |     |  |  |  |  |  |  |  |  |  |  |  |  |  |  |  |  |  |  |  |  |  |  |  |  |  |  |     |  |  |     |     |     |     |     |     |    |    |    |  |  |  |  |  |  |  |  |  |  |  |  |  |  |  |  |  |  |  |  |  |  |     |     |   |    |     |     |   |     |     |     |     |     |   |    |   |  |  |  |  |  |  |  |  |  |  |  |  |  |  |  |  |  |  |  |  |  |     |  |  |  |     |  |     |     |     |    |     |    |  |  |  |  |  |  |  |  |  |  |  |  |  |  |  |  |  |  |  |  |  |  |     |     |   |    |   |  |  |     |     |     |     |     |     |    |    |    |  |  |  |  |  |  |  |  |  |  |  |  |  |  |  |  |  |  |  |  |     |  |  |  |  |  |     |     |     |   |     |     |  |  |  |  |  |  |  |  |  |  |  |  |  |  |  |  |  |  |  |  |  |  |     |     |   |    |    |  |  |  |  |     |     |     |     |    |     |     |   |    |    |  |  |  |  |  |  |  |  |  |  |  |  |  |  |  |  |  |     |  |  |  |  |  |  |     |  |     |     |     |     |     |     |   |    |    |  |  |  |  |  |  |  |  |  |  |  |  |  |  |  |  |     |     |   |    |   |  |  |  |     |     |     |     |     |    |     |     |  |     |     |   |    |   |  |  |  |  |  |  |  |  |  |  |  |  |  |  |     |  |  |  |  |  |  |  |  |  |     |     |     |     |     |   |    |     |   |    |    |  |  |  |  |  |  |  |  |  |  |  |  |  |     |  |  |  |  |  |  |  |  |     |  |     |     |   |    |     |  |     |     |  |  |  |  |  |  |  |  |  |  |  |  |  |  |  |  |     |     |   |    |    |  |  |  |  |  |     |     |     |   |     |     |   |    |    |  |     |     |   |    |    |  |  |  |  |  |  |  |  |  |  |  |     |  |  |  |  |  |  |  |  |     |  |  |  |  |     |  |  |  |  |  |     |  |  |  |  |  |  |  |  |  |  |  |  |  |     |  |  |  |  |  |  |  |  |  |  |  |  |  |     |     |   |    |    |  |     |  |  |     |     |   |    |    |  |  |  |  |  |  |     |     |     |   |    |    |  |  |  |  |  |  |  |  |  |  |     |  |     |     |   |    |   |     |     |     |   |    |    |  |  |  |  |  |  |  |  |     |  |  |  |  |  |  |  |  |  |  |  |     |     |     |   |    |     |  |  |  |     |  |     |  |  |  |  |  |  |  |  |  |  |     |     |   |    |    |  |  |  |  |  |  |  |  |  |  |     |  |     |     |   |    |    |  |  |  |  |     |     |   |    |    |  |  |  |  |  |     |  |  |  |  |  |  |  |  |  |  |  |  |     |  |  |  |     |  |  |  |  |  |  |  |  |     |  |  |  |  |  |  |  |     |     |   |    |   |  |  |  |  |  |  |  |  |  |     |     |     |     |     |   |    |    |  |  |  |     |  |  |  |     |     |   |    |   |  |  |     |  |  |  |  |  |  |  |  |  |  |  |  |  |  |  |  |     |  |  |  |  |  |  |  |  |  |  |  |     |  |  |  |  |     |  |  |  |  |  |  |  |  |  |  |  |  |  |  |  |     |     |     |   |    |    |  |  |  |  |  |  |  |     |  |  |  |  |  |     |     |   |    |   |  |  |  |  |  |  |  |  |  |  |  |  |  |     |  |  |  |  |  |  |  |  |  |  |  |  |  |     |     |   |    |     |  |  |  |  |  |  |  |  |  |  |  |  |  |  |     |  |  |  |  |  |  |  |  |  |  |  |  |  |  |  |  |     |  |     |     |   |    |    |  |  |  |  |  |  |  |  |  |  |  |  |  |  |  |  |  |  |  |  |  |  |  |  |  |  |  |  |  |  |     |     |   |    |    |  |  |  |  |  |  |  |  |  |  |  |  |  |  |  |  |  |  |  |  |  |  |  |  |  |  |  |  |  |     |
|            | 342       |     |     |                           |        |            |       |        |          |          |        |          |            |    |            |       |        |          |          |        |          |        |    |            |       |        |       |        |                                |          |          |        |          |        |    |     |     |     |  |  |  |  |  |  |  |  |  |  |  |  |  |  |  |  |  |  |  |  |  |  |  |  |  |  |  |  |  |  |     |     |     |     |     |     |    |    |    |  |  |  |  |  |  |  |  |  |  |  |  |  |  |  |  |  |  |  |  |  |  |  |  |  |  |  |     |     |     |     |     |     |     |    |    |  |  |  |  |  |  |  |  |  |  |  |  |  |  |  |  |  |  |  |  |  |  |  |  |  |     |     |     |     |    |     |     |     |     |    |    |    |  |  |  |  |  |  |  |  |  |  |  |  |  |  |  |  |  |  |  |  |  |  |  |  |  |     |     |     |     |     |     |    |    |     |     |  |  |  |  |  |  |  |  |  |  |  |  |  |  |  |  |  |  |  |  |  |  |  |     |     |     |     |    |     |     |     |     |     |     |     |    |    |    |  |  |  |  |  |  |  |  |  |  |  |  |  |  |  |  |  |  |  |  |  |  |     |     |     |     |     |    |     |     |     |     |    |     |     |  |  |  |  |  |  |  |  |  |  |  |  |  |  |  |  |  |  |  |  |  |     |     |     |    |     |     |     |     |     |    |    |     |     |     |   |    |    |  |  |  |  |  |  |  |  |  |  |  |  |  |  |  |  |  |  |  |     |     |     |     |     |     |     |     |    |     |     |     |     |    |    |     |  |  |  |  |  |  |  |  |  |  |  |  |  |  |  |  |  |  |     |     |     |    |     |     |     |     |     |    |    |    |  |  |  |     |     |   |    |   |  |  |  |  |  |  |  |  |  |  |  |  |  |  |  |  |     |     |     |     |     |     |     |     |    |  |  |  |  |     |     |     |     |    |     |    |  |  |  |  |  |  |  |  |  |  |  |  |  |  |     |     |   |    |     |     |     |     |     |     |    |    |    |     |     |     |   |    |     |     |     |    |   |  |  |  |  |  |  |  |  |  |  |  |  |     |     |     |     |     |     |     |     |     |     |     |   |    |   |  |  |     |  |     |     |     |   |     |    |  |  |  |  |  |  |  |  |  |  |  |     |     |     |    |     |     |     |     |     |     |     |     |    |  |  |  |  |     |     |     |     |     |     |     |    |   |  |  |  |  |  |  |  |  |  |  |     |     |     |     |     |     |     |     |     |     |     |     |    |    |    |  |  |  |  |  |     |     |     |   |     |    |  |  |  |  |  |  |  |  |     |     |   |     |     |     |     |     |     |     |     |     |     |  |  |  |  |  |  |     |  |     |     |     |     |     |     |    |    |  |  |  |  |  |  |  |     |     |     |     |     |     |     |     |     |     |     |     |    |    |    |  |  |  |  |  |  |  |  |     |     |     |   |     |   |  |  |  |  |  |     |  |  |     |     |     |     |     |     |     |     |    |     |  |  |  |  |  |  |  |  |  |  |     |     |     |     |     |     |     |    |   |  |  |  |  |     |     |     |     |     |     |     |     |     |     |     |     |    |    |    |  |  |  |  |  |  |  |  |  |  |  |  |     |     |   |     |   |  |  |  |  |  |     |     |     |     |     |     |     |     |    |     |  |  |  |  |  |  |  |  |  |  |  |  |  |  |     |     |     |     |    |     |  |  |  |  |  |     |     |     |     |     |     |     |     |     |     |    |    |    |  |  |  |  |  |  |  |  |  |  |  |     |     |     |     |     |     |    |    |   |  |     |     |     |     |     |     |     |     |     |    |     |  |  |  |  |  |  |  |  |  |  |  |  |  |  |  |  |  |  |     |     |   |     |     |  |  |  |     |     |     |     |     |     |     |     |     |    |    |    |  |  |  |  |  |  |  |  |  |  |  |  |  |  |  |     |     |     |     |     |   |    |     |     |     |     |     |     |     |     |    |     |  |  |  |  |  |  |  |  |  |  |  |  |  |  |  |  |  |  |  |     |     |     |     |    |    |     |     |     |     |     |     |     |     |     |     |    |    |   |  |  |  |  |  |  |  |  |  |  |  |  |  |  |  |  |  |  |     |     |   |     |     |     |    |     |     |     |     |     |     |     |  |  |  |  |  |  |  |  |  |  |  |  |  |  |  |  |  |  |  |  |  |  |  |     |     |     |     |     |     |     |     |     |     |     |     |    |    |   |  |  |  |  |  |  |  |  |  |  |  |  |  |  |  |  |  |  |  |  |     |     |     |     |     |     |   |     |     |     |     |     |  |  |  |  |  |  |  |  |  |  |  |  |  |  |  |  |  |  |  |  |  |  |  |  |  |  |     |     |     |    |     |     |     |     |     |    |    |    |  |  |  |  |  |  |  |  |  |  |  |  |  |  |  |  |  |  |  |  |  |  |     |     |   |    |   |     |     |     |     |     |  |  |  |  |  |  |  |  |  |  |  |  |  |  |  |  |  |  |  |  |  |  |  |  |  |  |     |  |  |     |     |     |     |     |     |    |    |    |  |  |  |  |  |  |  |  |  |  |  |  |  |  |  |  |  |  |  |  |  |  |     |     |   |    |     |     |   |     |     |     |     |     |   |    |   |  |  |  |  |  |  |  |  |  |  |  |  |  |  |  |  |  |  |  |  |  |     |  |  |  |     |  |     |     |     |    |     |    |  |  |  |  |  |  |  |  |  |  |  |  |  |  |  |  |  |  |  |  |  |  |     |     |   |    |   |  |  |     |     |     |     |     |     |    |    |    |  |  |  |  |  |  |  |  |  |  |  |  |  |  |  |  |  |  |  |  |     |  |  |  |  |  |     |     |     |   |     |     |  |  |  |  |  |  |  |  |  |  |  |  |  |  |  |  |  |  |  |  |  |  |     |     |   |    |    |  |  |  |  |     |     |     |     |    |     |     |   |    |    |  |  |  |  |  |  |  |  |  |  |  |  |  |  |  |  |  |     |  |  |  |  |  |  |     |  |     |     |     |     |     |     |   |    |    |  |  |  |  |  |  |  |  |  |  |  |  |  |  |  |  |     |     |   |    |   |  |  |  |     |     |     |     |     |    |     |     |  |     |     |   |    |   |  |  |  |  |  |  |  |  |  |  |  |  |  |  |     |  |  |  |  |  |  |  |  |  |     |     |     |     |     |   |    |     |   |    |    |  |  |  |  |  |  |  |  |  |  |  |  |  |     |  |  |  |  |  |  |  |  |     |  |     |     |   |    |     |  |     |     |  |  |  |  |  |  |  |  |  |  |  |  |  |  |  |  |     |     |   |    |    |  |  |  |  |  |     |     |     |   |     |     |   |    |    |  |     |     |   |    |    |  |  |  |  |  |  |  |  |  |  |  |     |  |  |  |  |  |  |  |  |     |  |  |  |  |     |  |  |  |  |  |     |  |  |  |  |  |  |  |  |  |  |  |  |  |     |  |  |  |  |  |  |  |  |  |  |  |  |  |     |     |   |    |    |  |     |  |  |     |     |   |    |    |  |  |  |  |  |  |     |     |     |   |    |    |  |  |  |  |  |  |  |  |  |  |     |  |     |     |   |    |   |     |     |     |   |    |    |  |  |  |  |  |  |  |  |     |  |  |  |  |  |  |  |  |  |  |  |     |     |     |   |    |     |  |  |  |     |  |     |  |  |  |  |  |  |  |  |  |  |     |     |   |    |    |  |  |  |  |  |  |  |  |  |  |     |  |     |     |   |    |    |  |  |  |  |     |     |   |    |    |  |  |  |  |  |     |  |  |  |  |  |  |  |  |  |  |  |  |     |  |  |  |     |  |  |  |  |  |  |  |  |     |  |  |  |  |  |  |  |     |     |   |    |   |  |  |  |  |  |  |  |  |  |     |     |     |     |     |   |    |    |  |  |  |     |  |  |  |     |     |   |    |   |  |  |     |  |  |  |  |  |  |  |  |  |  |  |  |  |  |  |  |     |  |  |  |  |  |  |  |  |  |  |  |     |  |  |  |  |     |  |  |  |  |  |  |  |  |  |  |  |  |  |  |  |     |     |     |   |    |    |  |  |  |  |  |  |  |     |  |  |  |  |  |     |     |   |    |   |  |  |  |  |  |  |  |  |  |  |  |  |  |     |  |  |  |  |  |  |  |  |  |  |  |  |  |     |     |   |    |     |  |  |  |  |  |  |  |  |  |  |  |  |  |  |     |  |  |  |  |  |  |  |  |  |  |  |  |  |  |  |  |     |  |     |     |   |    |    |  |  |  |  |  |  |  |  |  |  |  |  |  |  |  |  |  |  |  |  |  |  |  |  |  |  |  |  |  |  |     |     |   |    |    |  |  |  |  |  |  |  |  |  |  |  |  |  |  |  |  |  |  |  |  |  |  |  |  |  |  |  |  |  |     |
| 076        | 038       | F   | 52  | 7                         |        |            |       |        |          |          |        |          |            |    |            |       |        |          |          |        |          |        |    |            |       |        |       |        |                                |          |          |        |          |        |    | 098 |     |     |  |  |  |  |  |  |  |  |  |  |  |  |  |  |  |  |  |  |  |  |  |  |  |  |  |  |  |  |  |  |     | 078 | 262 | F   | 85  | 14  |    |    |    |  |  |  |  |  |  |  |  |  |  |  |  |  |  |  |  |  |  |  |  |  |  |  |  |  |  |  |     | 291 |     |     |     |     |     |    |    |  |  |  |  |  |  |  |  |  |  |  |  |  |  |  |  |  |  |  |  |  |  |  |  |  |     | 079 | 314 | F   | 88 | 8   |     |     |     |    |    |    |  |  |  |  |  |  |  |  |  |  |  |  |  |  |  |  |  |  |  |  |  |  |  |  |  | 335 |     |     |     |     |     |    |    |     |     |  |  |  |  |  |  |  |  |  |  |  |  |  |  |  |  |  |  |  |  |  |  |  |     |     | 468 |     |    |     |     |     |     |     |     |     |    |    |    |  |  |  |  |  |  |  |  |  |  |  |  |  |  |  |  |  |  |  |  |  |  |     |     | 080 | 054 | F   | 71 | 10  |     |     |     |    |     |     |  |  |  |  |  |  |  |  |  |  |  |  |  |  |  |  |  |  |  |  |  |     |     |     |    | 089 |     |     |     |     |    |    |     |     |     |   |    |    |  |  |  |  |  |  |  |  |  |  |  |  |  |  |  |  |  |  |  |     |     |     | 131 |     |     |     |     |    |     |     |     |     |    |    |     |  |  |  |  |  |  |  |  |  |  |  |  |  |  |  |  |  |  |     |     |     |    |     | yes | 083 | 020 | M   | 67 | 18 |    |  |  |  |     |     |   |    |   |  |  |  |  |  |  |  |  |  |  |  |  |  |  |  |  |     |     |     |     |     |     | 088 |     |    |  |  |  |  |     |     |     |     |    |     |    |  |  |  |  |  |  |  |  |  |  |  |  |  |  |     |     |   |    |     |     | 084 | 012 | M   | 45  | 23 |    |    |     |     |     |   |    |     |     |     |    |   |  |  |  |  |  |  |  |  |  |  |  |  |     |     |     |     |     |     |     | 021 |     |     |     |   |    |   |  |  |     |  |     |     |     |   |     |    |  |  |  |  |  |  |  |  |  |  |  |     |     |     |    |     |     | 142 | 399 | M   | 73  | 7   |     |    |  |  |  |  |     |     |     |     |     |     |     |    |   |  |  |  |  |  |  |  |  |  |  |     |     |     |     |     |     | 427 |     |     |     |     |     |    |    |    |  |  |  |  |  |     |     |     |   |     |    |  |  |  |  |  |  |  |  |     |     |   |     |     |     |     | 505 |     |     |     |     |     |  |  |  |  |  |  |     |  |     |     |     |     |     |     |    |    |  |  |  |  |  |  |  |     |     |     |     |     |     |     |     | 153 | 444 | F   | 85  | 9  |    |    |  |  |  |  |  |  |  |  |     |     |     |   |     |   |  |  |  |  |  |     |  |  |     |     |     |     |     |     |     | 511 |    |     |  |  |  |  |  |  |  |  |  |  |     |     |     |     |     |     |     |    |   |  |  |  |  |     |     |     |     |     |     |     |     | 163 | 361 | F   | 47  | 23 |    |    |  |  |  |  |  |  |  |  |  |  |  |  |     |     |   |     |   |  |  |  |  |  |     |     |     |     |     |     |     | 424 |    |     |  |  |  |  |  |  |  |  |  |  |  |  |  |  |     |     |     |     |    |     |  |  |  |  |  |     |     |     |     |     | yes |     |     |     |     |    |    |    |  |  |  |  |  |  |  |  |  |  |  |     |     |     |     |     |     |    |    |   |  |     |     |     |     |     |     |     |     |     |    |     |  |  |  |  |  |  |  |  |  |  |  |  |  |  |  |  |  |  |     |     |   |     |     |  |  |  |     |     |     |     |     |     |     |     |     |    |    |    |  |  |  |  |  |  |  |  |  |  |  |  |  |  |  |     |     |     |     |     |   |    |     |     |     |     |     |     |     |     |    |     |  |  |  |  |  |  |  |  |  |  |  |  |  |  |  |  |  |  |  |     |     |     |     |    |    |     |     |     |     |     |     |     |     |     |     |    |    |   |  |  |  |  |  |  |  |  |  |  |  |  |  |  |  |  |  |  |     |     |   |     |     |     |    |     |     |     |     |     |     |     |  |  |  |  |  |  |  |  |  |  |  |  |  |  |  |  |  |  |  |  |  |  |  |     |     |     |     |     |     |     |     |     |     |     |     |    |    |   |  |  |  |  |  |  |  |  |  |  |  |  |  |  |  |  |  |  |  |  |     |     |     |     |     |     |   |     |     |     |     |     |  |  |  |  |  |  |  |  |  |  |  |  |  |  |  |  |  |  |  |  |  |  |  |  |  |  |     |     |     |    |     |     |     |     |     |    |    |    |  |  |  |  |  |  |  |  |  |  |  |  |  |  |  |  |  |  |  |  |  |  |     |     |   |    |   |     |     |     |     |     |  |  |  |  |  |  |  |  |  |  |  |  |  |  |  |  |  |  |  |  |  |  |  |  |  |  |     |  |  |     |     |     |     |     |     |    |    |    |  |  |  |  |  |  |  |  |  |  |  |  |  |  |  |  |  |  |  |  |  |  |     |     |   |    |     |     |   |     |     |     |     |     |   |    |   |  |  |  |  |  |  |  |  |  |  |  |  |  |  |  |  |  |  |  |  |  |     |  |  |  |     |  |     |     |     |    |     |    |  |  |  |  |  |  |  |  |  |  |  |  |  |  |  |  |  |  |  |  |  |  |     |     |   |    |   |  |  |     |     |     |     |     |     |    |    |    |  |  |  |  |  |  |  |  |  |  |  |  |  |  |  |  |  |  |  |  |     |  |  |  |  |  |     |     |     |   |     |     |  |  |  |  |  |  |  |  |  |  |  |  |  |  |  |  |  |  |  |  |  |  |     |     |   |    |    |  |  |  |  |     |     |     |     |    |     |     |   |    |    |  |  |  |  |  |  |  |  |  |  |  |  |  |  |  |  |  |     |  |  |  |  |  |  |     |  |     |     |     |     |     |     |   |    |    |  |  |  |  |  |  |  |  |  |  |  |  |  |  |  |  |     |     |   |    |   |  |  |  |     |     |     |     |     |    |     |     |  |     |     |   |    |   |  |  |  |  |  |  |  |  |  |  |  |  |  |  |     |  |  |  |  |  |  |  |  |  |     |     |     |     |     |   |    |     |   |    |    |  |  |  |  |  |  |  |  |  |  |  |  |  |     |  |  |  |  |  |  |  |  |     |  |     |     |   |    |     |  |     |     |  |  |  |  |  |  |  |  |  |  |  |  |  |  |  |  |     |     |   |    |    |  |  |  |  |  |     |     |     |   |     |     |   |    |    |  |     |     |   |    |    |  |  |  |  |  |  |  |  |  |  |  |     |  |  |  |  |  |  |  |  |     |  |  |  |  |     |  |  |  |  |  |     |  |  |  |  |  |  |  |  |  |  |  |  |  |     |  |  |  |  |  |  |  |  |  |  |  |  |  |     |     |   |    |    |  |     |  |  |     |     |   |    |    |  |  |  |  |  |  |     |     |     |   |    |    |  |  |  |  |  |  |  |  |  |  |     |  |     |     |   |    |   |     |     |     |   |    |    |  |  |  |  |  |  |  |  |     |  |  |  |  |  |  |  |  |  |  |  |     |     |     |   |    |     |  |  |  |     |  |     |  |  |  |  |  |  |  |  |  |  |     |     |   |    |    |  |  |  |  |  |  |  |  |  |  |     |  |     |     |   |    |    |  |  |  |  |     |     |   |    |    |  |  |  |  |  |     |  |  |  |  |  |  |  |  |  |  |  |  |     |  |  |  |     |  |  |  |  |  |  |  |  |     |  |  |  |  |  |  |  |     |     |   |    |   |  |  |  |  |  |  |  |  |  |     |     |     |     |     |   |    |    |  |  |  |     |  |  |  |     |     |   |    |   |  |  |     |  |  |  |  |  |  |  |  |  |  |  |  |  |  |  |  |     |  |  |  |  |  |  |  |  |  |  |  |     |  |  |  |  |     |  |  |  |  |  |  |  |  |  |  |  |  |  |  |  |     |     |     |   |    |    |  |  |  |  |  |  |  |     |  |  |  |  |  |     |     |   |    |   |  |  |  |  |  |  |  |  |  |  |  |  |  |     |  |  |  |  |  |  |  |  |  |  |  |  |  |     |     |   |    |     |  |  |  |  |  |  |  |  |  |  |  |  |  |  |     |  |  |  |  |  |  |  |  |  |  |  |  |  |  |  |  |     |  |     |     |   |    |    |  |  |  |  |  |  |  |  |  |  |  |  |  |  |  |  |  |  |  |  |  |  |  |  |  |  |  |  |  |  |     |     |   |    |    |  |  |  |  |  |  |  |  |  |  |  |  |  |  |  |  |  |  |  |  |  |  |  |  |  |  |  |  |  |     |
|            | 098       |     |     |                           |        |            |       |        |          |          |        |          |            |    |            |       |        |          |          |        |          |        |    |            |       |        |       |        |                                |          |          |        |          |        |    |     |     |     |  |  |  |  |  |  |  |  |  |  |  |  |  |  |  |  |  |  |  |  |  |  |  |  |  |  |  |  |  |  |     |     |     |     |     |     |    |    |    |  |  |  |  |  |  |  |  |  |  |  |  |  |  |  |  |  |  |  |  |  |  |  |  |  |  |  |     |     |     |     |     |     |     |    |    |  |  |  |  |  |  |  |  |  |  |  |  |  |  |  |  |  |  |  |  |  |  |  |  |  |     |     |     |     |    |     |     |     |     |    |    |    |  |  |  |  |  |  |  |  |  |  |  |  |  |  |  |  |  |  |  |  |  |  |  |  |  |     |     |     |     |     |     |    |    |     |     |  |  |  |  |  |  |  |  |  |  |  |  |  |  |  |  |  |  |  |  |  |  |  |     |     |     |     |    |     |     |     |     |     |     |     |    |    |    |  |  |  |  |  |  |  |  |  |  |  |  |  |  |  |  |  |  |  |  |  |  |     |     |     |     |     |    |     |     |     |     |    |     |     |  |  |  |  |  |  |  |  |  |  |  |  |  |  |  |  |  |  |  |  |  |     |     |     |    |     |     |     |     |     |    |    |     |     |     |   |    |    |  |  |  |  |  |  |  |  |  |  |  |  |  |  |  |  |  |  |  |     |     |     |     |     |     |     |     |    |     |     |     |     |    |    |     |  |  |  |  |  |  |  |  |  |  |  |  |  |  |  |  |  |  |     |     |     |    |     |     |     |     |     |    |    |    |  |  |  |     |     |   |    |   |  |  |  |  |  |  |  |  |  |  |  |  |  |  |  |  |     |     |     |     |     |     |     |     |    |  |  |  |  |     |     |     |     |    |     |    |  |  |  |  |  |  |  |  |  |  |  |  |  |  |     |     |   |    |     |     |     |     |     |     |    |    |    |     |     |     |   |    |     |     |     |    |   |  |  |  |  |  |  |  |  |  |  |  |  |     |     |     |     |     |     |     |     |     |     |     |   |    |   |  |  |     |  |     |     |     |   |     |    |  |  |  |  |  |  |  |  |  |  |  |     |     |     |    |     |     |     |     |     |     |     |     |    |  |  |  |  |     |     |     |     |     |     |     |    |   |  |  |  |  |  |  |  |  |  |  |     |     |     |     |     |     |     |     |     |     |     |     |    |    |    |  |  |  |  |  |     |     |     |   |     |    |  |  |  |  |  |  |  |  |     |     |   |     |     |     |     |     |     |     |     |     |     |  |  |  |  |  |  |     |  |     |     |     |     |     |     |    |    |  |  |  |  |  |  |  |     |     |     |     |     |     |     |     |     |     |     |     |    |    |    |  |  |  |  |  |  |  |  |     |     |     |   |     |   |  |  |  |  |  |     |  |  |     |     |     |     |     |     |     |     |    |     |  |  |  |  |  |  |  |  |  |  |     |     |     |     |     |     |     |    |   |  |  |  |  |     |     |     |     |     |     |     |     |     |     |     |     |    |    |    |  |  |  |  |  |  |  |  |  |  |  |  |     |     |   |     |   |  |  |  |  |  |     |     |     |     |     |     |     |     |    |     |  |  |  |  |  |  |  |  |  |  |  |  |  |  |     |     |     |     |    |     |  |  |  |  |  |     |     |     |     |     |     |     |     |     |     |    |    |    |  |  |  |  |  |  |  |  |  |  |  |     |     |     |     |     |     |    |    |   |  |     |     |     |     |     |     |     |     |     |    |     |  |  |  |  |  |  |  |  |  |  |  |  |  |  |  |  |  |  |     |     |   |     |     |  |  |  |     |     |     |     |     |     |     |     |     |    |    |    |  |  |  |  |  |  |  |  |  |  |  |  |  |  |  |     |     |     |     |     |   |    |     |     |     |     |     |     |     |     |    |     |  |  |  |  |  |  |  |  |  |  |  |  |  |  |  |  |  |  |  |     |     |     |     |    |    |     |     |     |     |     |     |     |     |     |     |    |    |   |  |  |  |  |  |  |  |  |  |  |  |  |  |  |  |  |  |  |     |     |   |     |     |     |    |     |     |     |     |     |     |     |  |  |  |  |  |  |  |  |  |  |  |  |  |  |  |  |  |  |  |  |  |  |  |     |     |     |     |     |     |     |     |     |     |     |     |    |    |   |  |  |  |  |  |  |  |  |  |  |  |  |  |  |  |  |  |  |  |  |     |     |     |     |     |     |   |     |     |     |     |     |  |  |  |  |  |  |  |  |  |  |  |  |  |  |  |  |  |  |  |  |  |  |  |  |  |  |     |     |     |    |     |     |     |     |     |    |    |    |  |  |  |  |  |  |  |  |  |  |  |  |  |  |  |  |  |  |  |  |  |  |     |     |   |    |   |     |     |     |     |     |  |  |  |  |  |  |  |  |  |  |  |  |  |  |  |  |  |  |  |  |  |  |  |  |  |  |     |  |  |     |     |     |     |     |     |    |    |    |  |  |  |  |  |  |  |  |  |  |  |  |  |  |  |  |  |  |  |  |  |  |     |     |   |    |     |     |   |     |     |     |     |     |   |    |   |  |  |  |  |  |  |  |  |  |  |  |  |  |  |  |  |  |  |  |  |  |     |  |  |  |     |  |     |     |     |    |     |    |  |  |  |  |  |  |  |  |  |  |  |  |  |  |  |  |  |  |  |  |  |  |     |     |   |    |   |  |  |     |     |     |     |     |     |    |    |    |  |  |  |  |  |  |  |  |  |  |  |  |  |  |  |  |  |  |  |  |     |  |  |  |  |  |     |     |     |   |     |     |  |  |  |  |  |  |  |  |  |  |  |  |  |  |  |  |  |  |  |  |  |  |     |     |   |    |    |  |  |  |  |     |     |     |     |    |     |     |   |    |    |  |  |  |  |  |  |  |  |  |  |  |  |  |  |  |  |  |     |  |  |  |  |  |  |     |  |     |     |     |     |     |     |   |    |    |  |  |  |  |  |  |  |  |  |  |  |  |  |  |  |  |     |     |   |    |   |  |  |  |     |     |     |     |     |    |     |     |  |     |     |   |    |   |  |  |  |  |  |  |  |  |  |  |  |  |  |  |     |  |  |  |  |  |  |  |  |  |     |     |     |     |     |   |    |     |   |    |    |  |  |  |  |  |  |  |  |  |  |  |  |  |     |  |  |  |  |  |  |  |  |     |  |     |     |   |    |     |  |     |     |  |  |  |  |  |  |  |  |  |  |  |  |  |  |  |  |     |     |   |    |    |  |  |  |  |  |     |     |     |   |     |     |   |    |    |  |     |     |   |    |    |  |  |  |  |  |  |  |  |  |  |  |     |  |  |  |  |  |  |  |  |     |  |  |  |  |     |  |  |  |  |  |     |  |  |  |  |  |  |  |  |  |  |  |  |  |     |  |  |  |  |  |  |  |  |  |  |  |  |  |     |     |   |    |    |  |     |  |  |     |     |   |    |    |  |  |  |  |  |  |     |     |     |   |    |    |  |  |  |  |  |  |  |  |  |  |     |  |     |     |   |    |   |     |     |     |   |    |    |  |  |  |  |  |  |  |  |     |  |  |  |  |  |  |  |  |  |  |  |     |     |     |   |    |     |  |  |  |     |  |     |  |  |  |  |  |  |  |  |  |  |     |     |   |    |    |  |  |  |  |  |  |  |  |  |  |     |  |     |     |   |    |    |  |  |  |  |     |     |   |    |    |  |  |  |  |  |     |  |  |  |  |  |  |  |  |  |  |  |  |     |  |  |  |     |  |  |  |  |  |  |  |  |     |  |  |  |  |  |  |  |     |     |   |    |   |  |  |  |  |  |  |  |  |  |     |     |     |     |     |   |    |    |  |  |  |     |  |  |  |     |     |   |    |   |  |  |     |  |  |  |  |  |  |  |  |  |  |  |  |  |  |  |  |     |  |  |  |  |  |  |  |  |  |  |  |     |  |  |  |  |     |  |  |  |  |  |  |  |  |  |  |  |  |  |  |  |     |     |     |   |    |    |  |  |  |  |  |  |  |     |  |  |  |  |  |     |     |   |    |   |  |  |  |  |  |  |  |  |  |  |  |  |  |     |  |  |  |  |  |  |  |  |  |  |  |  |  |     |     |   |    |     |  |  |  |  |  |  |  |  |  |  |  |  |  |  |     |  |  |  |  |  |  |  |  |  |  |  |  |  |  |  |  |     |  |     |     |   |    |    |  |  |  |  |  |  |  |  |  |  |  |  |  |  |  |  |  |  |  |  |  |  |  |  |  |  |  |  |  |  |     |     |   |    |    |  |  |  |  |  |  |  |  |  |  |  |  |  |  |  |  |  |  |  |  |  |  |  |  |  |  |  |  |  |     |
| 078        | 262       | F   | 85  | 14                        |        |            |       |        |          |          |        |          |            |    |            |       |        |          |          |        |          |        |    |            |       |        |       |        |                                |          |          |        |          |        |    | 291 |     |     |  |  |  |  |  |  |  |  |  |  |  |  |  |  |  |  |  |  |  |  |  |  |  |  |  |  |  |  |  |  |     | 079 | 314 | F   | 88  | 8   |    |    |    |  |  |  |  |  |  |  |  |  |  |  |  |  |  |  |  |  |  |  |  |  |  |  |  |  |  |  |     | 335 |     |     |     |     |     |    |    |  |  |  |  |  |  |  |  |  |  |  |  |  |  |  |  |  |  |  |  |  |  |  |  |  |     |     | 468 |     |    |     |     |     |     |    |    |    |  |  |  |  |  |  |  |  |  |  |  |  |  |  |  |  |  |  |  |  |  |  |  |  |  |     |     | 080 | 054 | F   | 71  | 10 |    |     |     |  |  |  |  |  |  |  |  |  |  |  |  |  |  |  |  |  |  |  |  |  |  |  |     |     |     |     |    | 089 |     |     |     |     |     |     |    |    |    |  |  |  |  |  |  |  |  |  |  |  |  |  |  |  |  |  |  |  |  |  |  |     |     |     | 131 |     |    |     |     |     |     |    |     |     |  |  |  |  |  |  |  |  |  |  |  |  |  |  |  |  |  |  |  |  |  |     |     |     |    |     | yes | 083 | 020 | M   | 67 | 18 |     |     |     |   |    |    |  |  |  |  |  |  |  |  |  |  |  |  |  |  |  |  |  |  |  |     |     |     |     |     |     | 088 |     |    |     |     |     |     |    |    |     |  |  |  |  |  |  |  |  |  |  |  |  |  |  |  |  |  |  |     |     |     |    |     |     | 084 | 012 | M   | 45 | 23 |    |  |  |  |     |     |   |    |   |  |  |  |  |  |  |  |  |  |  |  |  |  |  |  |  |     |     |     |     |     |     | 021 |     |    |  |  |  |  |     |     |     |     |    |     |    |  |  |  |  |  |  |  |  |  |  |  |  |  |  |     |     |   |    |     |     | 142 | 399 | M   | 73  | 7  |    |    |     |     |     |   |    |     |     |     |    |   |  |  |  |  |  |  |  |  |  |  |  |  |     |     |     |     |     |     |     | 427 |     |     |     |   |    |   |  |  |     |  |     |     |     |   |     |    |  |  |  |  |  |  |  |  |  |  |  |     |     |     |    |     |     |     | 505 |     |     |     |     |    |  |  |  |  |     |     |     |     |     |     |     |    |   |  |  |  |  |  |  |  |  |  |  |     |     |     |     |     |     |     |     | 153 | 444 | F   | 85  | 9  |    |    |  |  |  |  |  |     |     |     |   |     |    |  |  |  |  |  |  |  |  |     |     |   |     |     |     |     |     |     |     | 511 |     |     |  |  |  |  |  |  |     |  |     |     |     |     |     |     |    |    |  |  |  |  |  |  |  |     |     |     |     |     |     |     |     | 163 | 361 | F   | 47  | 23 |    |    |  |  |  |  |  |  |  |  |     |     |     |   |     |   |  |  |  |  |  |     |  |  |     |     |     |     |     |     |     | 424 |    |     |  |  |  |  |  |  |  |  |  |  |     |     |     |     |     |     |     |    |   |  |  |  |  |     |     |     |     |     |     |     | yes |     |     |     |     |    |    |    |  |  |  |  |  |  |  |  |  |  |  |  |     |     |   |     |   |  |  |  |  |  |     |     |     |     |     |     |     |     |    |     |  |  |  |  |  |  |  |  |  |  |  |  |  |  |     |     |     |     |    |     |  |  |  |  |  |     |     |     |     |     |     |     |     |     |     |    |    |    |  |  |  |  |  |  |  |  |  |  |  |     |     |     |     |     |     |    |    |   |  |     |     |     |     |     |     |     |     |     |    |     |  |  |  |  |  |  |  |  |  |  |  |  |  |  |  |  |  |  |     |     |   |     |     |  |  |  |     |     |     |     |     |     |     |     |     |    |    |    |  |  |  |  |  |  |  |  |  |  |  |  |  |  |  |     |     |     |     |     |   |    |     |     |     |     |     |     |     |     |    |     |  |  |  |  |  |  |  |  |  |  |  |  |  |  |  |  |  |  |  |     |     |     |     |    |    |     |     |     |     |     |     |     |     |     |     |    |    |   |  |  |  |  |  |  |  |  |  |  |  |  |  |  |  |  |  |  |     |     |   |     |     |     |    |     |     |     |     |     |     |     |  |  |  |  |  |  |  |  |  |  |  |  |  |  |  |  |  |  |  |  |  |  |  |     |     |     |     |     |     |     |     |     |     |     |     |    |    |   |  |  |  |  |  |  |  |  |  |  |  |  |  |  |  |  |  |  |  |  |     |     |     |     |     |     |   |     |     |     |     |     |  |  |  |  |  |  |  |  |  |  |  |  |  |  |  |  |  |  |  |  |  |  |  |  |  |  |     |     |     |    |     |     |     |     |     |    |    |    |  |  |  |  |  |  |  |  |  |  |  |  |  |  |  |  |  |  |  |  |  |  |     |     |   |    |   |     |     |     |     |     |  |  |  |  |  |  |  |  |  |  |  |  |  |  |  |  |  |  |  |  |  |  |  |  |  |  |     |  |  |     |     |     |     |     |     |    |    |    |  |  |  |  |  |  |  |  |  |  |  |  |  |  |  |  |  |  |  |  |  |  |     |     |   |    |     |     |   |     |     |     |     |     |   |    |   |  |  |  |  |  |  |  |  |  |  |  |  |  |  |  |  |  |  |  |  |  |     |  |  |  |     |  |     |     |     |    |     |    |  |  |  |  |  |  |  |  |  |  |  |  |  |  |  |  |  |  |  |  |  |  |     |     |   |    |   |  |  |     |     |     |     |     |     |    |    |    |  |  |  |  |  |  |  |  |  |  |  |  |  |  |  |  |  |  |  |  |     |  |  |  |  |  |     |     |     |   |     |     |  |  |  |  |  |  |  |  |  |  |  |  |  |  |  |  |  |  |  |  |  |  |     |     |   |    |    |  |  |  |  |     |     |     |     |    |     |     |   |    |    |  |  |  |  |  |  |  |  |  |  |  |  |  |  |  |  |  |     |  |  |  |  |  |  |     |  |     |     |     |     |     |     |   |    |    |  |  |  |  |  |  |  |  |  |  |  |  |  |  |  |  |     |     |   |    |   |  |  |  |     |     |     |     |     |    |     |     |  |     |     |   |    |   |  |  |  |  |  |  |  |  |  |  |  |  |  |  |     |  |  |  |  |  |  |  |  |  |     |     |     |     |     |   |    |     |   |    |    |  |  |  |  |  |  |  |  |  |  |  |  |  |     |  |  |  |  |  |  |  |  |     |  |     |     |   |    |     |  |     |     |  |  |  |  |  |  |  |  |  |  |  |  |  |  |  |  |     |     |   |    |    |  |  |  |  |  |     |     |     |   |     |     |   |    |    |  |     |     |   |    |    |  |  |  |  |  |  |  |  |  |  |  |     |  |  |  |  |  |  |  |  |     |  |  |  |  |     |  |  |  |  |  |     |  |  |  |  |  |  |  |  |  |  |  |  |  |     |  |  |  |  |  |  |  |  |  |  |  |  |  |     |     |   |    |    |  |     |  |  |     |     |   |    |    |  |  |  |  |  |  |     |     |     |   |    |    |  |  |  |  |  |  |  |  |  |  |     |  |     |     |   |    |   |     |     |     |   |    |    |  |  |  |  |  |  |  |  |     |  |  |  |  |  |  |  |  |  |  |  |     |     |     |   |    |     |  |  |  |     |  |     |  |  |  |  |  |  |  |  |  |  |     |     |   |    |    |  |  |  |  |  |  |  |  |  |  |     |  |     |     |   |    |    |  |  |  |  |     |     |   |    |    |  |  |  |  |  |     |  |  |  |  |  |  |  |  |  |  |  |  |     |  |  |  |     |  |  |  |  |  |  |  |  |     |  |  |  |  |  |  |  |     |     |   |    |   |  |  |  |  |  |  |  |  |  |     |     |     |     |     |   |    |    |  |  |  |     |  |  |  |     |     |   |    |   |  |  |     |  |  |  |  |  |  |  |  |  |  |  |  |  |  |  |  |     |  |  |  |  |  |  |  |  |  |  |  |     |  |  |  |  |     |  |  |  |  |  |  |  |  |  |  |  |  |  |  |  |     |     |     |   |    |    |  |  |  |  |  |  |  |     |  |  |  |  |  |     |     |   |    |   |  |  |  |  |  |  |  |  |  |  |  |  |  |     |  |  |  |  |  |  |  |  |  |  |  |  |  |     |     |   |    |     |  |  |  |  |  |  |  |  |  |  |  |  |  |  |     |  |  |  |  |  |  |  |  |  |  |  |  |  |  |  |  |     |  |     |     |   |    |    |  |  |  |  |  |  |  |  |  |  |  |  |  |  |  |  |  |  |  |  |  |  |  |  |  |  |  |  |  |  |     |     |   |    |    |  |  |  |  |  |  |  |  |  |  |  |  |  |  |  |  |  |  |  |  |  |  |  |  |  |  |  |  |  |     |
|            | 291       |     |     |                           |        |            |       |        |          |          |        |          |            |    |            |       |        |          |          |        |          |        |    |            |       |        |       |        |                                |          |          |        |          |        |    |     |     |     |  |  |  |  |  |  |  |  |  |  |  |  |  |  |  |  |  |  |  |  |  |  |  |  |  |  |  |  |  |  |     |     |     |     |     |     |    |    |    |  |  |  |  |  |  |  |  |  |  |  |  |  |  |  |  |  |  |  |  |  |  |  |  |  |  |  |     |     |     |     |     |     |     |    |    |  |  |  |  |  |  |  |  |  |  |  |  |  |  |  |  |  |  |  |  |  |  |  |  |  |     |     |     |     |    |     |     |     |     |    |    |    |  |  |  |  |  |  |  |  |  |  |  |  |  |  |  |  |  |  |  |  |  |  |  |  |  |     |     |     |     |     |     |    |    |     |     |  |  |  |  |  |  |  |  |  |  |  |  |  |  |  |  |  |  |  |  |  |  |  |     |     |     |     |    |     |     |     |     |     |     |     |    |    |    |  |  |  |  |  |  |  |  |  |  |  |  |  |  |  |  |  |  |  |  |  |  |     |     |     |     |     |    |     |     |     |     |    |     |     |  |  |  |  |  |  |  |  |  |  |  |  |  |  |  |  |  |  |  |  |  |     |     |     |    |     |     |     |     |     |    |    |     |     |     |   |    |    |  |  |  |  |  |  |  |  |  |  |  |  |  |  |  |  |  |  |  |     |     |     |     |     |     |     |     |    |     |     |     |     |    |    |     |  |  |  |  |  |  |  |  |  |  |  |  |  |  |  |  |  |  |     |     |     |    |     |     |     |     |     |    |    |    |  |  |  |     |     |   |    |   |  |  |  |  |  |  |  |  |  |  |  |  |  |  |  |  |     |     |     |     |     |     |     |     |    |  |  |  |  |     |     |     |     |    |     |    |  |  |  |  |  |  |  |  |  |  |  |  |  |  |     |     |   |    |     |     |     |     |     |     |    |    |    |     |     |     |   |    |     |     |     |    |   |  |  |  |  |  |  |  |  |  |  |  |  |     |     |     |     |     |     |     |     |     |     |     |   |    |   |  |  |     |  |     |     |     |   |     |    |  |  |  |  |  |  |  |  |  |  |  |     |     |     |    |     |     |     |     |     |     |     |     |    |  |  |  |  |     |     |     |     |     |     |     |    |   |  |  |  |  |  |  |  |  |  |  |     |     |     |     |     |     |     |     |     |     |     |     |    |    |    |  |  |  |  |  |     |     |     |   |     |    |  |  |  |  |  |  |  |  |     |     |   |     |     |     |     |     |     |     |     |     |     |  |  |  |  |  |  |     |  |     |     |     |     |     |     |    |    |  |  |  |  |  |  |  |     |     |     |     |     |     |     |     |     |     |     |     |    |    |    |  |  |  |  |  |  |  |  |     |     |     |   |     |   |  |  |  |  |  |     |  |  |     |     |     |     |     |     |     |     |    |     |  |  |  |  |  |  |  |  |  |  |     |     |     |     |     |     |     |    |   |  |  |  |  |     |     |     |     |     |     |     |     |     |     |     |     |    |    |    |  |  |  |  |  |  |  |  |  |  |  |  |     |     |   |     |   |  |  |  |  |  |     |     |     |     |     |     |     |     |    |     |  |  |  |  |  |  |  |  |  |  |  |  |  |  |     |     |     |     |    |     |  |  |  |  |  |     |     |     |     |     |     |     |     |     |     |    |    |    |  |  |  |  |  |  |  |  |  |  |  |     |     |     |     |     |     |    |    |   |  |     |     |     |     |     |     |     |     |     |    |     |  |  |  |  |  |  |  |  |  |  |  |  |  |  |  |  |  |  |     |     |   |     |     |  |  |  |     |     |     |     |     |     |     |     |     |    |    |    |  |  |  |  |  |  |  |  |  |  |  |  |  |  |  |     |     |     |     |     |   |    |     |     |     |     |     |     |     |     |    |     |  |  |  |  |  |  |  |  |  |  |  |  |  |  |  |  |  |  |  |     |     |     |     |    |    |     |     |     |     |     |     |     |     |     |     |    |    |   |  |  |  |  |  |  |  |  |  |  |  |  |  |  |  |  |  |  |     |     |   |     |     |     |    |     |     |     |     |     |     |     |  |  |  |  |  |  |  |  |  |  |  |  |  |  |  |  |  |  |  |  |  |  |  |     |     |     |     |     |     |     |     |     |     |     |     |    |    |   |  |  |  |  |  |  |  |  |  |  |  |  |  |  |  |  |  |  |  |  |     |     |     |     |     |     |   |     |     |     |     |     |  |  |  |  |  |  |  |  |  |  |  |  |  |  |  |  |  |  |  |  |  |  |  |  |  |  |     |     |     |    |     |     |     |     |     |    |    |    |  |  |  |  |  |  |  |  |  |  |  |  |  |  |  |  |  |  |  |  |  |  |     |     |   |    |   |     |     |     |     |     |  |  |  |  |  |  |  |  |  |  |  |  |  |  |  |  |  |  |  |  |  |  |  |  |  |  |     |  |  |     |     |     |     |     |     |    |    |    |  |  |  |  |  |  |  |  |  |  |  |  |  |  |  |  |  |  |  |  |  |  |     |     |   |    |     |     |   |     |     |     |     |     |   |    |   |  |  |  |  |  |  |  |  |  |  |  |  |  |  |  |  |  |  |  |  |  |     |  |  |  |     |  |     |     |     |    |     |    |  |  |  |  |  |  |  |  |  |  |  |  |  |  |  |  |  |  |  |  |  |  |     |     |   |    |   |  |  |     |     |     |     |     |     |    |    |    |  |  |  |  |  |  |  |  |  |  |  |  |  |  |  |  |  |  |  |  |     |  |  |  |  |  |     |     |     |   |     |     |  |  |  |  |  |  |  |  |  |  |  |  |  |  |  |  |  |  |  |  |  |  |     |     |   |    |    |  |  |  |  |     |     |     |     |    |     |     |   |    |    |  |  |  |  |  |  |  |  |  |  |  |  |  |  |  |  |  |     |  |  |  |  |  |  |     |  |     |     |     |     |     |     |   |    |    |  |  |  |  |  |  |  |  |  |  |  |  |  |  |  |  |     |     |   |    |   |  |  |  |     |     |     |     |     |    |     |     |  |     |     |   |    |   |  |  |  |  |  |  |  |  |  |  |  |  |  |  |     |  |  |  |  |  |  |  |  |  |     |     |     |     |     |   |    |     |   |    |    |  |  |  |  |  |  |  |  |  |  |  |  |  |     |  |  |  |  |  |  |  |  |     |  |     |     |   |    |     |  |     |     |  |  |  |  |  |  |  |  |  |  |  |  |  |  |  |  |     |     |   |    |    |  |  |  |  |  |     |     |     |   |     |     |   |    |    |  |     |     |   |    |    |  |  |  |  |  |  |  |  |  |  |  |     |  |  |  |  |  |  |  |  |     |  |  |  |  |     |  |  |  |  |  |     |  |  |  |  |  |  |  |  |  |  |  |  |  |     |  |  |  |  |  |  |  |  |  |  |  |  |  |     |     |   |    |    |  |     |  |  |     |     |   |    |    |  |  |  |  |  |  |     |     |     |   |    |    |  |  |  |  |  |  |  |  |  |  |     |  |     |     |   |    |   |     |     |     |   |    |    |  |  |  |  |  |  |  |  |     |  |  |  |  |  |  |  |  |  |  |  |     |     |     |   |    |     |  |  |  |     |  |     |  |  |  |  |  |  |  |  |  |  |     |     |   |    |    |  |  |  |  |  |  |  |  |  |  |     |  |     |     |   |    |    |  |  |  |  |     |     |   |    |    |  |  |  |  |  |     |  |  |  |  |  |  |  |  |  |  |  |  |     |  |  |  |     |  |  |  |  |  |  |  |  |     |  |  |  |  |  |  |  |     |     |   |    |   |  |  |  |  |  |  |  |  |  |     |     |     |     |     |   |    |    |  |  |  |     |  |  |  |     |     |   |    |   |  |  |     |  |  |  |  |  |  |  |  |  |  |  |  |  |  |  |  |     |  |  |  |  |  |  |  |  |  |  |  |     |  |  |  |  |     |  |  |  |  |  |  |  |  |  |  |  |  |  |  |  |     |     |     |   |    |    |  |  |  |  |  |  |  |     |  |  |  |  |  |     |     |   |    |   |  |  |  |  |  |  |  |  |  |  |  |  |  |     |  |  |  |  |  |  |  |  |  |  |  |  |  |     |     |   |    |     |  |  |  |  |  |  |  |  |  |  |  |  |  |  |     |  |  |  |  |  |  |  |  |  |  |  |  |  |  |  |  |     |  |     |     |   |    |    |  |  |  |  |  |  |  |  |  |  |  |  |  |  |  |  |  |  |  |  |  |  |  |  |  |  |  |  |  |  |     |     |   |    |    |  |  |  |  |  |  |  |  |  |  |  |  |  |  |  |  |  |  |  |  |  |  |  |  |  |  |  |  |  |     |
| 079        | 314       | F   | 88  | 8                         |        |            |       |        |          |          |        |          |            |    |            |       |        |          |          |        |          |        |    |            |       |        |       |        |                                |          |          |        |          |        |    | 335 |     |     |  |  |  |  |  |  |  |  |  |  |  |  |  |  |  |  |  |  |  |  |  |  |  |  |  |  |  |  |  |  |     |     | 468 |     |     |     |    |    |    |  |  |  |  |  |  |  |  |  |  |  |  |  |  |  |  |  |  |  |  |  |  |  |  |  |  |  |     |     |     | 080 | 054 | F   | 71  | 10 |    |  |  |  |  |  |  |  |  |  |  |  |  |  |  |  |  |  |  |  |  |  |  |  |  |  |     |     |     |     |    | 089 |     |     |     |    |    |    |  |  |  |  |  |  |  |  |  |  |  |  |  |  |  |  |  |  |  |  |  |  |  |  |  |     |     |     | 131 |     |     |    |    |     |     |  |  |  |  |  |  |  |  |  |  |  |  |  |  |  |  |  |  |  |  |  |  |  |     |     |     |     |    |     | yes | 083 | 020 | M   | 67  | 18  |    |    |    |  |  |  |  |  |  |  |  |  |  |  |  |  |  |  |  |  |  |  |  |  |  |     |     |     |     |     |    | 088 |     |     |     |    |     |     |  |  |  |  |  |  |  |  |  |  |  |  |  |  |  |  |  |  |  |  |  |     |     |     |    |     |     | 084 | 012 | M   | 45 | 23 |     |     |     |   |    |    |  |  |  |  |  |  |  |  |  |  |  |  |  |  |  |  |  |  |  |     |     |     |     |     |     | 021 |     |    |     |     |     |     |    |    |     |  |  |  |  |  |  |  |  |  |  |  |  |  |  |  |  |  |  |     |     |     |    |     |     | 142 | 399 | M   | 73 | 7  |    |  |  |  |     |     |   |    |   |  |  |  |  |  |  |  |  |  |  |  |  |  |  |  |  |     |     |     |     |     |     | 427 |     |    |  |  |  |  |     |     |     |     |    |     |    |  |  |  |  |  |  |  |  |  |  |  |  |  |  |     |     |   |    |     |     |     | 505 |     |     |    |    |    |     |     |     |   |    |     |     |     |    |   |  |  |  |  |  |  |  |  |  |  |  |  |     |     |     |     |     |     |     |     |     | 153 | 444 | F | 85 | 9 |  |  |     |  |     |     |     |   |     |    |  |  |  |  |  |  |  |  |  |  |  |     |     |     |    |     |     |     |     |     |     | 511 |     |    |  |  |  |  |     |     |     |     |     |     |     |    |   |  |  |  |  |  |  |  |  |  |  |     |     |     |     |     |     |     |     | 163 | 361 | F   | 47  | 23 |    |    |  |  |  |  |  |     |     |     |   |     |    |  |  |  |  |  |  |  |  |     |     |   |     |     |     |     |     |     |     | 424 |     |     |  |  |  |  |  |  |     |  |     |     |     |     |     |     |    |    |  |  |  |  |  |  |  |     |     |     |     |     |     |     | yes |     |     |     |     |    |    |    |  |  |  |  |  |  |  |  |     |     |     |   |     |   |  |  |  |  |  |     |  |  |     |     |     |     |     |     |     |     |    |     |  |  |  |  |  |  |  |  |  |  |     |     |     |     |     |     |     |    |   |  |  |  |  |     |     |     |     |     |     |     |     |     |     |     |     |    |    |    |  |  |  |  |  |  |  |  |  |  |  |  |     |     |   |     |   |  |  |  |  |  |     |     |     |     |     |     |     |     |    |     |  |  |  |  |  |  |  |  |  |  |  |  |  |  |     |     |     |     |    |     |  |  |  |  |  |     |     |     |     |     |     |     |     |     |     |    |    |    |  |  |  |  |  |  |  |  |  |  |  |     |     |     |     |     |     |    |    |   |  |     |     |     |     |     |     |     |     |     |    |     |  |  |  |  |  |  |  |  |  |  |  |  |  |  |  |  |  |  |     |     |   |     |     |  |  |  |     |     |     |     |     |     |     |     |     |    |    |    |  |  |  |  |  |  |  |  |  |  |  |  |  |  |  |     |     |     |     |     |   |    |     |     |     |     |     |     |     |     |    |     |  |  |  |  |  |  |  |  |  |  |  |  |  |  |  |  |  |  |  |     |     |     |     |    |    |     |     |     |     |     |     |     |     |     |     |    |    |   |  |  |  |  |  |  |  |  |  |  |  |  |  |  |  |  |  |  |     |     |   |     |     |     |    |     |     |     |     |     |     |     |  |  |  |  |  |  |  |  |  |  |  |  |  |  |  |  |  |  |  |  |  |  |  |     |     |     |     |     |     |     |     |     |     |     |     |    |    |   |  |  |  |  |  |  |  |  |  |  |  |  |  |  |  |  |  |  |  |  |     |     |     |     |     |     |   |     |     |     |     |     |  |  |  |  |  |  |  |  |  |  |  |  |  |  |  |  |  |  |  |  |  |  |  |  |  |  |     |     |     |    |     |     |     |     |     |    |    |    |  |  |  |  |  |  |  |  |  |  |  |  |  |  |  |  |  |  |  |  |  |  |     |     |   |    |   |     |     |     |     |     |  |  |  |  |  |  |  |  |  |  |  |  |  |  |  |  |  |  |  |  |  |  |  |  |  |  |     |  |  |     |     |     |     |     |     |    |    |    |  |  |  |  |  |  |  |  |  |  |  |  |  |  |  |  |  |  |  |  |  |  |     |     |   |    |     |     |   |     |     |     |     |     |   |    |   |  |  |  |  |  |  |  |  |  |  |  |  |  |  |  |  |  |  |  |  |  |     |  |  |  |     |  |     |     |     |    |     |    |  |  |  |  |  |  |  |  |  |  |  |  |  |  |  |  |  |  |  |  |  |  |     |     |   |    |   |  |  |     |     |     |     |     |     |    |    |    |  |  |  |  |  |  |  |  |  |  |  |  |  |  |  |  |  |  |  |  |     |  |  |  |  |  |     |     |     |   |     |     |  |  |  |  |  |  |  |  |  |  |  |  |  |  |  |  |  |  |  |  |  |  |     |     |   |    |    |  |  |  |  |     |     |     |     |    |     |     |   |    |    |  |  |  |  |  |  |  |  |  |  |  |  |  |  |  |  |  |     |  |  |  |  |  |  |     |  |     |     |     |     |     |     |   |    |    |  |  |  |  |  |  |  |  |  |  |  |  |  |  |  |  |     |     |   |    |   |  |  |  |     |     |     |     |     |    |     |     |  |     |     |   |    |   |  |  |  |  |  |  |  |  |  |  |  |  |  |  |     |  |  |  |  |  |  |  |  |  |     |     |     |     |     |   |    |     |   |    |    |  |  |  |  |  |  |  |  |  |  |  |  |  |     |  |  |  |  |  |  |  |  |     |  |     |     |   |    |     |  |     |     |  |  |  |  |  |  |  |  |  |  |  |  |  |  |  |  |     |     |   |    |    |  |  |  |  |  |     |     |     |   |     |     |   |    |    |  |     |     |   |    |    |  |  |  |  |  |  |  |  |  |  |  |     |  |  |  |  |  |  |  |  |     |  |  |  |  |     |  |  |  |  |  |     |  |  |  |  |  |  |  |  |  |  |  |  |  |     |  |  |  |  |  |  |  |  |  |  |  |  |  |     |     |   |    |    |  |     |  |  |     |     |   |    |    |  |  |  |  |  |  |     |     |     |   |    |    |  |  |  |  |  |  |  |  |  |  |     |  |     |     |   |    |   |     |     |     |   |    |    |  |  |  |  |  |  |  |  |     |  |  |  |  |  |  |  |  |  |  |  |     |     |     |   |    |     |  |  |  |     |  |     |  |  |  |  |  |  |  |  |  |  |     |     |   |    |    |  |  |  |  |  |  |  |  |  |  |     |  |     |     |   |    |    |  |  |  |  |     |     |   |    |    |  |  |  |  |  |     |  |  |  |  |  |  |  |  |  |  |  |  |     |  |  |  |     |  |  |  |  |  |  |  |  |     |  |  |  |  |  |  |  |     |     |   |    |   |  |  |  |  |  |  |  |  |  |     |     |     |     |     |   |    |    |  |  |  |     |  |  |  |     |     |   |    |   |  |  |     |  |  |  |  |  |  |  |  |  |  |  |  |  |  |  |  |     |  |  |  |  |  |  |  |  |  |  |  |     |  |  |  |  |     |  |  |  |  |  |  |  |  |  |  |  |  |  |  |  |     |     |     |   |    |    |  |  |  |  |  |  |  |     |  |  |  |  |  |     |     |   |    |   |  |  |  |  |  |  |  |  |  |  |  |  |  |     |  |  |  |  |  |  |  |  |  |  |  |  |  |     |     |   |    |     |  |  |  |  |  |  |  |  |  |  |  |  |  |  |     |  |  |  |  |  |  |  |  |  |  |  |  |  |  |  |  |     |  |     |     |   |    |    |  |  |  |  |  |  |  |  |  |  |  |  |  |  |  |  |  |  |  |  |  |  |  |  |  |  |  |  |  |  |     |     |   |    |    |  |  |  |  |  |  |  |  |  |  |  |  |  |  |  |  |  |  |  |  |  |  |  |  |  |  |  |  |  |     |
|            | 335       |     |     |                           |        |            |       |        |          |          |        |          |            |    |            |       |        |          |          |        |          |        |    |            |       |        |       |        |                                |          |          |        |          |        |    |     | 468 |     |  |  |  |  |  |  |  |  |  |  |  |  |  |  |  |  |  |  |  |  |  |  |  |  |  |  |  |  |  |  |     |     |     | 080 | 054 | F   | 71 | 10 |    |  |  |  |  |  |  |  |  |  |  |  |  |  |  |  |  |  |  |  |  |  |  |  |  |  |  |  |     |     |     |     | 089 |     |     |    |    |  |  |  |  |  |  |  |  |  |  |  |  |  |  |  |  |  |  |  |  |  |  |  |  |  |     |     |     |     |    |     | 131 |     |     |    |    |    |  |  |  |  |  |  |  |  |  |  |  |  |  |  |  |  |  |  |  |  |  |  |  |  |  |     |     |     | yes | 083 | 020 | M  | 67 | 18  |     |  |  |  |  |  |  |  |  |  |  |  |  |  |  |  |  |  |  |  |  |  |  |  |     |     |     |     |    |     |     |     | 088 |     |     |     |    |    |    |  |  |  |  |  |  |  |  |  |  |  |  |  |  |  |  |  |  |  |  |  |  |     |     |     |     |     |    |     | 084 | 012 | M   | 45 | 23  |     |  |  |  |  |  |  |  |  |  |  |  |  |  |  |  |  |  |  |  |  |  |     |     |     |    |     |     |     |     |     |    |    |     | 021 |     |   |    |    |  |  |  |  |  |  |  |  |  |  |  |  |  |  |  |  |  |  |  |     |     |     |     |     |     |     |     |    |     | 142 | 399 | M   | 73 | 7  |     |  |  |  |  |  |  |  |  |  |  |  |  |  |  |  |  |  |  |     |     |     |    |     |     |     |     |     |    |    |    |  |  |  | 427 |     |   |    |   |  |  |  |  |  |  |  |  |  |  |  |  |  |  |  |  |     |     |     |     |     |     |     |     |    |  |  |  |  | 505 |     |     |     |    |     |    |  |  |  |  |  |  |  |  |  |  |  |  |  |  |     |     |   |    |     |     |     |     |     |     |    |    |    |     | 153 | 444 | F | 85 | 9   |     |     |    |   |  |  |  |  |  |  |  |  |  |  |  |  |     |     |     |     |     |     |     |     |     |     |     |   |    |   |  |  |     |  | 511 |     |     |   |     |    |  |  |  |  |  |  |  |  |  |  |  |     |     |     |    |     |     |     |     |     |     |     |     |    |  |  |  |  | 163 | 361 | F   | 47  | 23  |     |     |    |   |  |  |  |  |  |  |  |  |  |  |     |     |     |     |     |     |     |     |     |     |     |     |    |    |    |  |  |  |  |  | 424 |     |     |   |     |    |  |  |  |  |  |  |  |  |     |     |   |     |     |     |     |     |     |     |     |     |     |  |  |  |  |  |  | yes |  |     |     |     |     |     |     |    |    |  |  |  |  |  |  |  |     |     |     |     |     |     |     |     |     |     |     |     |    |    |    |  |  |  |  |  |  |  |  |     |     |     |   |     |   |  |  |  |  |  |     |  |  |     |     |     |     |     |     |     |     |    |     |  |  |  |  |  |  |  |  |  |  |     |     |     |     |     |     |     |    |   |  |  |  |  |     |     |     |     |     |     |     |     |     |     |     |     |    |    |    |  |  |  |  |  |  |  |  |  |  |  |  |     |     |   |     |   |  |  |  |  |  |     |     |     |     |     |     |     |     |    |     |  |  |  |  |  |  |  |  |  |  |  |  |  |  |     |     |     |     |    |     |  |  |  |  |  |     |     |     |     |     |     |     |     |     |     |    |    |    |  |  |  |  |  |  |  |  |  |  |  |     |     |     |     |     |     |    |    |   |  |     |     |     |     |     |     |     |     |     |    |     |  |  |  |  |  |  |  |  |  |  |  |  |  |  |  |  |  |  |     |     |   |     |     |  |  |  |     |     |     |     |     |     |     |     |     |    |    |    |  |  |  |  |  |  |  |  |  |  |  |  |  |  |  |     |     |     |     |     |   |    |     |     |     |     |     |     |     |     |    |     |  |  |  |  |  |  |  |  |  |  |  |  |  |  |  |  |  |  |  |     |     |     |     |    |    |     |     |     |     |     |     |     |     |     |     |    |    |   |  |  |  |  |  |  |  |  |  |  |  |  |  |  |  |  |  |  |     |     |   |     |     |     |    |     |     |     |     |     |     |     |  |  |  |  |  |  |  |  |  |  |  |  |  |  |  |  |  |  |  |  |  |  |  |     |     |     |     |     |     |     |     |     |     |     |     |    |    |   |  |  |  |  |  |  |  |  |  |  |  |  |  |  |  |  |  |  |  |  |     |     |     |     |     |     |   |     |     |     |     |     |  |  |  |  |  |  |  |  |  |  |  |  |  |  |  |  |  |  |  |  |  |  |  |  |  |  |     |     |     |    |     |     |     |     |     |    |    |    |  |  |  |  |  |  |  |  |  |  |  |  |  |  |  |  |  |  |  |  |  |  |     |     |   |    |   |     |     |     |     |     |  |  |  |  |  |  |  |  |  |  |  |  |  |  |  |  |  |  |  |  |  |  |  |  |  |  |     |  |  |     |     |     |     |     |     |    |    |    |  |  |  |  |  |  |  |  |  |  |  |  |  |  |  |  |  |  |  |  |  |  |     |     |   |    |     |     |   |     |     |     |     |     |   |    |   |  |  |  |  |  |  |  |  |  |  |  |  |  |  |  |  |  |  |  |  |  |     |  |  |  |     |  |     |     |     |    |     |    |  |  |  |  |  |  |  |  |  |  |  |  |  |  |  |  |  |  |  |  |  |  |     |     |   |    |   |  |  |     |     |     |     |     |     |    |    |    |  |  |  |  |  |  |  |  |  |  |  |  |  |  |  |  |  |  |  |  |     |  |  |  |  |  |     |     |     |   |     |     |  |  |  |  |  |  |  |  |  |  |  |  |  |  |  |  |  |  |  |  |  |  |     |     |   |    |    |  |  |  |  |     |     |     |     |    |     |     |   |    |    |  |  |  |  |  |  |  |  |  |  |  |  |  |  |  |  |  |     |  |  |  |  |  |  |     |  |     |     |     |     |     |     |   |    |    |  |  |  |  |  |  |  |  |  |  |  |  |  |  |  |  |     |     |   |    |   |  |  |  |     |     |     |     |     |    |     |     |  |     |     |   |    |   |  |  |  |  |  |  |  |  |  |  |  |  |  |  |     |  |  |  |  |  |  |  |  |  |     |     |     |     |     |   |    |     |   |    |    |  |  |  |  |  |  |  |  |  |  |  |  |  |     |  |  |  |  |  |  |  |  |     |  |     |     |   |    |     |  |     |     |  |  |  |  |  |  |  |  |  |  |  |  |  |  |  |  |     |     |   |    |    |  |  |  |  |  |     |     |     |   |     |     |   |    |    |  |     |     |   |    |    |  |  |  |  |  |  |  |  |  |  |  |     |  |  |  |  |  |  |  |  |     |  |  |  |  |     |  |  |  |  |  |     |  |  |  |  |  |  |  |  |  |  |  |  |  |     |  |  |  |  |  |  |  |  |  |  |  |  |  |     |     |   |    |    |  |     |  |  |     |     |   |    |    |  |  |  |  |  |  |     |     |     |   |    |    |  |  |  |  |  |  |  |  |  |  |     |  |     |     |   |    |   |     |     |     |   |    |    |  |  |  |  |  |  |  |  |     |  |  |  |  |  |  |  |  |  |  |  |     |     |     |   |    |     |  |  |  |     |  |     |  |  |  |  |  |  |  |  |  |  |     |     |   |    |    |  |  |  |  |  |  |  |  |  |  |     |  |     |     |   |    |    |  |  |  |  |     |     |   |    |    |  |  |  |  |  |     |  |  |  |  |  |  |  |  |  |  |  |  |     |  |  |  |     |  |  |  |  |  |  |  |  |     |  |  |  |  |  |  |  |     |     |   |    |   |  |  |  |  |  |  |  |  |  |     |     |     |     |     |   |    |    |  |  |  |     |  |  |  |     |     |   |    |   |  |  |     |  |  |  |  |  |  |  |  |  |  |  |  |  |  |  |  |     |  |  |  |  |  |  |  |  |  |  |  |     |  |  |  |  |     |  |  |  |  |  |  |  |  |  |  |  |  |  |  |  |     |     |     |   |    |    |  |  |  |  |  |  |  |     |  |  |  |  |  |     |     |   |    |   |  |  |  |  |  |  |  |  |  |  |  |  |  |     |  |  |  |  |  |  |  |  |  |  |  |  |  |     |     |   |    |     |  |  |  |  |  |  |  |  |  |  |  |  |  |  |     |  |  |  |  |  |  |  |  |  |  |  |  |  |  |  |  |     |  |     |     |   |    |    |  |  |  |  |  |  |  |  |  |  |  |  |  |  |  |  |  |  |  |  |  |  |  |  |  |  |  |  |  |  |     |     |   |    |    |  |  |  |  |  |  |  |  |  |  |  |  |  |  |  |  |  |  |  |  |  |  |  |  |  |  |  |  |  |     |
|            | 468       |     |     |                           |        |            |       |        |          |          |        |          |            |    |            |       |        |          |          |        |          |        |    |            |       |        |       |        |                                |          |          |        |          |        |    |     |     |     |  |  |  |  |  |  |  |  |  |  |  |  |  |  |  |  |  |  |  |  |  |  |  |  |  |  |  |  |  |  |     |     |     |     |     |     |    |    |    |  |  |  |  |  |  |  |  |  |  |  |  |  |  |  |  |  |  |  |  |  |  |  |  |  |  |  |     |     |     |     |     |     |     |    |    |  |  |  |  |  |  |  |  |  |  |  |  |  |  |  |  |  |  |  |  |  |  |  |  |  |     |     |     |     |    |     |     |     |     |    |    |    |  |  |  |  |  |  |  |  |  |  |  |  |  |  |  |  |  |  |  |  |  |  |  |  |  |     |     |     |     |     |     |    |    |     |     |  |  |  |  |  |  |  |  |  |  |  |  |  |  |  |  |  |  |  |  |  |  |  |     |     |     |     |    |     |     |     |     |     |     |     |    |    |    |  |  |  |  |  |  |  |  |  |  |  |  |  |  |  |  |  |  |  |  |  |  |     |     |     |     |     |    |     |     |     |     |    |     |     |  |  |  |  |  |  |  |  |  |  |  |  |  |  |  |  |  |  |  |  |  |     |     |     |    |     |     |     |     |     |    |    |     |     |     |   |    |    |  |  |  |  |  |  |  |  |  |  |  |  |  |  |  |  |  |  |  |     |     |     |     |     |     |     |     |    |     |     |     |     |    |    |     |  |  |  |  |  |  |  |  |  |  |  |  |  |  |  |  |  |  |     |     |     |    |     |     |     |     |     |    |    |    |  |  |  |     |     |   |    |   |  |  |  |  |  |  |  |  |  |  |  |  |  |  |  |  |     |     |     |     |     |     |     |     |    |  |  |  |  |     |     |     |     |    |     |    |  |  |  |  |  |  |  |  |  |  |  |  |  |  |     |     |   |    |     |     |     |     |     |     |    |    |    |     |     |     |   |    |     |     |     |    |   |  |  |  |  |  |  |  |  |  |  |  |  |     |     |     |     |     |     |     |     |     |     |     |   |    |   |  |  |     |  |     |     |     |   |     |    |  |  |  |  |  |  |  |  |  |  |  |     |     |     |    |     |     |     |     |     |     |     |     |    |  |  |  |  |     |     |     |     |     |     |     |    |   |  |  |  |  |  |  |  |  |  |  |     |     |     |     |     |     |     |     |     |     |     |     |    |    |    |  |  |  |  |  |     |     |     |   |     |    |  |  |  |  |  |  |  |  |     |     |   |     |     |     |     |     |     |     |     |     |     |  |  |  |  |  |  |     |  |     |     |     |     |     |     |    |    |  |  |  |  |  |  |  |     |     |     |     |     |     |     |     |     |     |     |     |    |    |    |  |  |  |  |  |  |  |  |     |     |     |   |     |   |  |  |  |  |  |     |  |  |     |     |     |     |     |     |     |     |    |     |  |  |  |  |  |  |  |  |  |  |     |     |     |     |     |     |     |    |   |  |  |  |  |     |     |     |     |     |     |     |     |     |     |     |     |    |    |    |  |  |  |  |  |  |  |  |  |  |  |  |     |     |   |     |   |  |  |  |  |  |     |     |     |     |     |     |     |     |    |     |  |  |  |  |  |  |  |  |  |  |  |  |  |  |     |     |     |     |    |     |  |  |  |  |  |     |     |     |     |     |     |     |     |     |     |    |    |    |  |  |  |  |  |  |  |  |  |  |  |     |     |     |     |     |     |    |    |   |  |     |     |     |     |     |     |     |     |     |    |     |  |  |  |  |  |  |  |  |  |  |  |  |  |  |  |  |  |  |     |     |   |     |     |  |  |  |     |     |     |     |     |     |     |     |     |    |    |    |  |  |  |  |  |  |  |  |  |  |  |  |  |  |  |     |     |     |     |     |   |    |     |     |     |     |     |     |     |     |    |     |  |  |  |  |  |  |  |  |  |  |  |  |  |  |  |  |  |  |  |     |     |     |     |    |    |     |     |     |     |     |     |     |     |     |     |    |    |   |  |  |  |  |  |  |  |  |  |  |  |  |  |  |  |  |  |  |     |     |   |     |     |     |    |     |     |     |     |     |     |     |  |  |  |  |  |  |  |  |  |  |  |  |  |  |  |  |  |  |  |  |  |  |  |     |     |     |     |     |     |     |     |     |     |     |     |    |    |   |  |  |  |  |  |  |  |  |  |  |  |  |  |  |  |  |  |  |  |  |     |     |     |     |     |     |   |     |     |     |     |     |  |  |  |  |  |  |  |  |  |  |  |  |  |  |  |  |  |  |  |  |  |  |  |  |  |  |     |     |     |    |     |     |     |     |     |    |    |    |  |  |  |  |  |  |  |  |  |  |  |  |  |  |  |  |  |  |  |  |  |  |     |     |   |    |   |     |     |     |     |     |  |  |  |  |  |  |  |  |  |  |  |  |  |  |  |  |  |  |  |  |  |  |  |  |  |  |     |  |  |     |     |     |     |     |     |    |    |    |  |  |  |  |  |  |  |  |  |  |  |  |  |  |  |  |  |  |  |  |  |  |     |     |   |    |     |     |   |     |     |     |     |     |   |    |   |  |  |  |  |  |  |  |  |  |  |  |  |  |  |  |  |  |  |  |  |  |     |  |  |  |     |  |     |     |     |    |     |    |  |  |  |  |  |  |  |  |  |  |  |  |  |  |  |  |  |  |  |  |  |  |     |     |   |    |   |  |  |     |     |     |     |     |     |    |    |    |  |  |  |  |  |  |  |  |  |  |  |  |  |  |  |  |  |  |  |  |     |  |  |  |  |  |     |     |     |   |     |     |  |  |  |  |  |  |  |  |  |  |  |  |  |  |  |  |  |  |  |  |  |  |     |     |   |    |    |  |  |  |  |     |     |     |     |    |     |     |   |    |    |  |  |  |  |  |  |  |  |  |  |  |  |  |  |  |  |  |     |  |  |  |  |  |  |     |  |     |     |     |     |     |     |   |    |    |  |  |  |  |  |  |  |  |  |  |  |  |  |  |  |  |     |     |   |    |   |  |  |  |     |     |     |     |     |    |     |     |  |     |     |   |    |   |  |  |  |  |  |  |  |  |  |  |  |  |  |  |     |  |  |  |  |  |  |  |  |  |     |     |     |     |     |   |    |     |   |    |    |  |  |  |  |  |  |  |  |  |  |  |  |  |     |  |  |  |  |  |  |  |  |     |  |     |     |   |    |     |  |     |     |  |  |  |  |  |  |  |  |  |  |  |  |  |  |  |  |     |     |   |    |    |  |  |  |  |  |     |     |     |   |     |     |   |    |    |  |     |     |   |    |    |  |  |  |  |  |  |  |  |  |  |  |     |  |  |  |  |  |  |  |  |     |  |  |  |  |     |  |  |  |  |  |     |  |  |  |  |  |  |  |  |  |  |  |  |  |     |  |  |  |  |  |  |  |  |  |  |  |  |  |     |     |   |    |    |  |     |  |  |     |     |   |    |    |  |  |  |  |  |  |     |     |     |   |    |    |  |  |  |  |  |  |  |  |  |  |     |  |     |     |   |    |   |     |     |     |   |    |    |  |  |  |  |  |  |  |  |     |  |  |  |  |  |  |  |  |  |  |  |     |     |     |   |    |     |  |  |  |     |  |     |  |  |  |  |  |  |  |  |  |  |     |     |   |    |    |  |  |  |  |  |  |  |  |  |  |     |  |     |     |   |    |    |  |  |  |  |     |     |   |    |    |  |  |  |  |  |     |  |  |  |  |  |  |  |  |  |  |  |  |     |  |  |  |     |  |  |  |  |  |  |  |  |     |  |  |  |  |  |  |  |     |     |   |    |   |  |  |  |  |  |  |  |  |  |     |     |     |     |     |   |    |    |  |  |  |     |  |  |  |     |     |   |    |   |  |  |     |  |  |  |  |  |  |  |  |  |  |  |  |  |  |  |  |     |  |  |  |  |  |  |  |  |  |  |  |     |  |  |  |  |     |  |  |  |  |  |  |  |  |  |  |  |  |  |  |  |     |     |     |   |    |    |  |  |  |  |  |  |  |     |  |  |  |  |  |     |     |   |    |   |  |  |  |  |  |  |  |  |  |  |  |  |  |     |  |  |  |  |  |  |  |  |  |  |  |  |  |     |     |   |    |     |  |  |  |  |  |  |  |  |  |  |  |  |  |  |     |  |  |  |  |  |  |  |  |  |  |  |  |  |  |  |  |     |  |     |     |   |    |    |  |  |  |  |  |  |  |  |  |  |  |  |  |  |  |  |  |  |  |  |  |  |  |  |  |  |  |  |  |  |     |     |   |    |    |  |  |  |  |  |  |  |  |  |  |  |  |  |  |  |  |  |  |  |  |  |  |  |  |  |  |  |  |  |     |
| 080        | 054       | F   | 71  | 10                        |        |            |       |        |          |          |        |          |            |    |            |       |        |          |          |        |          |        |    |            |       |        |       |        |                                |          |          |        |          |        |    | 089 |     |     |  |  |  |  |  |  |  |  |  |  |  |  |  |  |  |  |  |  |  |  |  |  |  |  |  |  |  |  |  |  |     | 131 |     |     |     |     |    |    |    |  |  |  |  |  |  |  |  |  |  |  |  |  |  |  |  |  |  |  |  |  |  |  |  |  |  |  |     |     | yes | 083 | 020 | M   | 67  | 18 |    |  |  |  |  |  |  |  |  |  |  |  |  |  |  |  |  |  |  |  |  |  |  |  |  |  |     |     |     |     |    | 088 |     |     |     |    |    |    |  |  |  |  |  |  |  |  |  |  |  |  |  |  |  |  |  |  |  |  |  |  |  |  |  |     |     | 084 | 012 | M   | 45  | 23 |    |     |     |  |  |  |  |  |  |  |  |  |  |  |  |  |  |  |  |  |  |  |  |  |  |  |     |     |     |     |    | 021 |     |     |     |     |     |     |    |    |    |  |  |  |  |  |  |  |  |  |  |  |  |  |  |  |  |  |  |  |  |  |  |     |     | 142 | 399 | M   | 73 | 7   |     |     |     |    |     |     |  |  |  |  |  |  |  |  |  |  |  |  |  |  |  |  |  |  |  |  |  |     |     |     |    | 427 |     |     |     |     |    |    |     |     |     |   |    |    |  |  |  |  |  |  |  |  |  |  |  |  |  |  |  |  |  |  |  |     |     | 505 |     |     |     |     |     |    |     |     |     |     |    |    |     |  |  |  |  |  |  |  |  |  |  |  |  |  |  |  |  |  |  |     |     |     |    |     |     | 153 | 444 | F   | 85 | 9  |    |  |  |  |     |     |   |    |   |  |  |  |  |  |  |  |  |  |  |  |  |  |  |  |  |     |     |     |     |     |     | 511 |     |    |  |  |  |  |     |     |     |     |    |     |    |  |  |  |  |  |  |  |  |  |  |  |  |  |  |     |     |   |    |     |     | 163 | 361 | F   | 47  | 23 |    |    |     |     |     |   |    |     |     |     |    |   |  |  |  |  |  |  |  |  |  |  |  |  |     |     |     |     |     |     |     | 424 |     |     |     |   |    |   |  |  |     |  |     |     |     |   |     |    |  |  |  |  |  |  |  |  |  |  |  |     |     |     |    |     | yes |     |     |     |     |     |     |    |  |  |  |  |     |     |     |     |     |     |     |    |   |  |  |  |  |  |  |  |  |  |  |     |     |     |     |     |     |     |     |     |     |     |     |    |    |    |  |  |  |  |  |     |     |     |   |     |    |  |  |  |  |  |  |  |  |     |     |   |     |     |     |     |     |     |     |     |     |     |  |  |  |  |  |  |     |  |     |     |     |     |     |     |    |    |  |  |  |  |  |  |  |     |     |     |     |     |     |     |     |     |     |     |     |    |    |    |  |  |  |  |  |  |  |  |     |     |     |   |     |   |  |  |  |  |  |     |  |  |     |     |     |     |     |     |     |     |    |     |  |  |  |  |  |  |  |  |  |  |     |     |     |     |     |     |     |    |   |  |  |  |  |     |     |     |     |     |     |     |     |     |     |     |     |    |    |    |  |  |  |  |  |  |  |  |  |  |  |  |     |     |   |     |   |  |  |  |  |  |     |     |     |     |     |     |     |     |    |     |  |  |  |  |  |  |  |  |  |  |  |  |  |  |     |     |     |     |    |     |  |  |  |  |  |     |     |     |     |     |     |     |     |     |     |    |    |    |  |  |  |  |  |  |  |  |  |  |  |     |     |     |     |     |     |    |    |   |  |     |     |     |     |     |     |     |     |     |    |     |  |  |  |  |  |  |  |  |  |  |  |  |  |  |  |  |  |  |     |     |   |     |     |  |  |  |     |     |     |     |     |     |     |     |     |    |    |    |  |  |  |  |  |  |  |  |  |  |  |  |  |  |  |     |     |     |     |     |   |    |     |     |     |     |     |     |     |     |    |     |  |  |  |  |  |  |  |  |  |  |  |  |  |  |  |  |  |  |  |     |     |     |     |    |    |     |     |     |     |     |     |     |     |     |     |    |    |   |  |  |  |  |  |  |  |  |  |  |  |  |  |  |  |  |  |  |     |     |   |     |     |     |    |     |     |     |     |     |     |     |  |  |  |  |  |  |  |  |  |  |  |  |  |  |  |  |  |  |  |  |  |  |  |     |     |     |     |     |     |     |     |     |     |     |     |    |    |   |  |  |  |  |  |  |  |  |  |  |  |  |  |  |  |  |  |  |  |  |     |     |     |     |     |     |   |     |     |     |     |     |  |  |  |  |  |  |  |  |  |  |  |  |  |  |  |  |  |  |  |  |  |  |  |  |  |  |     |     |     |    |     |     |     |     |     |    |    |    |  |  |  |  |  |  |  |  |  |  |  |  |  |  |  |  |  |  |  |  |  |  |     |     |   |    |   |     |     |     |     |     |  |  |  |  |  |  |  |  |  |  |  |  |  |  |  |  |  |  |  |  |  |  |  |  |  |  |     |  |  |     |     |     |     |     |     |    |    |    |  |  |  |  |  |  |  |  |  |  |  |  |  |  |  |  |  |  |  |  |  |  |     |     |   |    |     |     |   |     |     |     |     |     |   |    |   |  |  |  |  |  |  |  |  |  |  |  |  |  |  |  |  |  |  |  |  |  |     |  |  |  |     |  |     |     |     |    |     |    |  |  |  |  |  |  |  |  |  |  |  |  |  |  |  |  |  |  |  |  |  |  |     |     |   |    |   |  |  |     |     |     |     |     |     |    |    |    |  |  |  |  |  |  |  |  |  |  |  |  |  |  |  |  |  |  |  |  |     |  |  |  |  |  |     |     |     |   |     |     |  |  |  |  |  |  |  |  |  |  |  |  |  |  |  |  |  |  |  |  |  |  |     |     |   |    |    |  |  |  |  |     |     |     |     |    |     |     |   |    |    |  |  |  |  |  |  |  |  |  |  |  |  |  |  |  |  |  |     |  |  |  |  |  |  |     |  |     |     |     |     |     |     |   |    |    |  |  |  |  |  |  |  |  |  |  |  |  |  |  |  |  |     |     |   |    |   |  |  |  |     |     |     |     |     |    |     |     |  |     |     |   |    |   |  |  |  |  |  |  |  |  |  |  |  |  |  |  |     |  |  |  |  |  |  |  |  |  |     |     |     |     |     |   |    |     |   |    |    |  |  |  |  |  |  |  |  |  |  |  |  |  |     |  |  |  |  |  |  |  |  |     |  |     |     |   |    |     |  |     |     |  |  |  |  |  |  |  |  |  |  |  |  |  |  |  |  |     |     |   |    |    |  |  |  |  |  |     |     |     |   |     |     |   |    |    |  |     |     |   |    |    |  |  |  |  |  |  |  |  |  |  |  |     |  |  |  |  |  |  |  |  |     |  |  |  |  |     |  |  |  |  |  |     |  |  |  |  |  |  |  |  |  |  |  |  |  |     |  |  |  |  |  |  |  |  |  |  |  |  |  |     |     |   |    |    |  |     |  |  |     |     |   |    |    |  |  |  |  |  |  |     |     |     |   |    |    |  |  |  |  |  |  |  |  |  |  |     |  |     |     |   |    |   |     |     |     |   |    |    |  |  |  |  |  |  |  |  |     |  |  |  |  |  |  |  |  |  |  |  |     |     |     |   |    |     |  |  |  |     |  |     |  |  |  |  |  |  |  |  |  |  |     |     |   |    |    |  |  |  |  |  |  |  |  |  |  |     |  |     |     |   |    |    |  |  |  |  |     |     |   |    |    |  |  |  |  |  |     |  |  |  |  |  |  |  |  |  |  |  |  |     |  |  |  |     |  |  |  |  |  |  |  |  |     |  |  |  |  |  |  |  |     |     |   |    |   |  |  |  |  |  |  |  |  |  |     |     |     |     |     |   |    |    |  |  |  |     |  |  |  |     |     |   |    |   |  |  |     |  |  |  |  |  |  |  |  |  |  |  |  |  |  |  |  |     |  |  |  |  |  |  |  |  |  |  |  |     |  |  |  |  |     |  |  |  |  |  |  |  |  |  |  |  |  |  |  |  |     |     |     |   |    |    |  |  |  |  |  |  |  |     |  |  |  |  |  |     |     |   |    |   |  |  |  |  |  |  |  |  |  |  |  |  |  |     |  |  |  |  |  |  |  |  |  |  |  |  |  |     |     |   |    |     |  |  |  |  |  |  |  |  |  |  |  |  |  |  |     |  |  |  |  |  |  |  |  |  |  |  |  |  |  |  |  |     |  |     |     |   |    |    |  |  |  |  |  |  |  |  |  |  |  |  |  |  |  |  |  |  |  |  |  |  |  |  |  |  |  |  |  |  |     |     |   |    |    |  |  |  |  |  |  |  |  |  |  |  |  |  |  |  |  |  |  |  |  |  |  |  |  |  |  |  |  |  |     |
|            | 089       |     |     |                           |        |            |       |        |          |          |        |          |            |    |            |       |        |          |          |        |          |        |    |            |       |        |       |        |                                |          |          |        |          |        |    |     | 131 |     |  |  |  |  |  |  |  |  |  |  |  |  |  |  |  |  |  |  |  |  |  |  |  |  |  |  |  |  |  |  |     |     | yes | 083 | 020 | M   | 67 | 18 |    |  |  |  |  |  |  |  |  |  |  |  |  |  |  |  |  |  |  |  |  |  |  |  |  |  |  |  |     |     |     |     | 088 |     |     |    |    |  |  |  |  |  |  |  |  |  |  |  |  |  |  |  |  |  |  |  |  |  |  |  |  |  |     |     |     |     |    |     | 084 | 012 | M   | 45 | 23 |    |  |  |  |  |  |  |  |  |  |  |  |  |  |  |  |  |  |  |  |  |  |  |  |  |  |     |     |     |     |     |     |    |    | 021 |     |  |  |  |  |  |  |  |  |  |  |  |  |  |  |  |  |  |  |  |  |  |  |  |     |     |     |     |    |     |     |     |     | 142 | 399 | M   | 73 | 7  |    |  |  |  |  |  |  |  |  |  |  |  |  |  |  |  |  |  |  |  |  |  |  |     |     |     |     |     |    |     |     |     |     |    | 427 |     |  |  |  |  |  |  |  |  |  |  |  |  |  |  |  |  |  |  |  |  |  |     |     |     |    |     |     |     |     |     |    |    | 505 |     |     |   |    |    |  |  |  |  |  |  |  |  |  |  |  |  |  |  |  |  |  |  |  |     |     |     |     |     |     |     |     |    |     | 153 | 444 | F   | 85 | 9  |     |  |  |  |  |  |  |  |  |  |  |  |  |  |  |  |  |  |  |     |     |     |    |     |     |     |     |     |    |    |    |  |  |  | 511 |     |   |    |   |  |  |  |  |  |  |  |  |  |  |  |  |  |  |  |  |     |     |     |     |     |     |     |     |    |  |  |  |  | 163 | 361 | F   | 47  | 23 |     |    |  |  |  |  |  |  |  |  |  |  |  |  |  |  |     |     |   |    |     |     |     |     |     |     |    |    |    |     |     |     |   |    | 424 |     |     |    |   |  |  |  |  |  |  |  |  |  |  |  |  |     |     |     |     |     |     |     |     |     |     |     |   |    |   |  |  | yes |  |     |     |     |   |     |    |  |  |  |  |  |  |  |  |  |  |  |     |     |     |    |     |     |     |     |     |     |     |     |    |  |  |  |  |     |     |     |     |     |     |     |    |   |  |  |  |  |  |  |  |  |  |  |     |     |     |     |     |     |     |     |     |     |     |     |    |    |    |  |  |  |  |  |     |     |     |   |     |    |  |  |  |  |  |  |  |  |     |     |   |     |     |     |     |     |     |     |     |     |     |  |  |  |  |  |  |     |  |     |     |     |     |     |     |    |    |  |  |  |  |  |  |  |     |     |     |     |     |     |     |     |     |     |     |     |    |    |    |  |  |  |  |  |  |  |  |     |     |     |   |     |   |  |  |  |  |  |     |  |  |     |     |     |     |     |     |     |     |    |     |  |  |  |  |  |  |  |  |  |  |     |     |     |     |     |     |     |    |   |  |  |  |  |     |     |     |     |     |     |     |     |     |     |     |     |    |    |    |  |  |  |  |  |  |  |  |  |  |  |  |     |     |   |     |   |  |  |  |  |  |     |     |     |     |     |     |     |     |    |     |  |  |  |  |  |  |  |  |  |  |  |  |  |  |     |     |     |     |    |     |  |  |  |  |  |     |     |     |     |     |     |     |     |     |     |    |    |    |  |  |  |  |  |  |  |  |  |  |  |     |     |     |     |     |     |    |    |   |  |     |     |     |     |     |     |     |     |     |    |     |  |  |  |  |  |  |  |  |  |  |  |  |  |  |  |  |  |  |     |     |   |     |     |  |  |  |     |     |     |     |     |     |     |     |     |    |    |    |  |  |  |  |  |  |  |  |  |  |  |  |  |  |  |     |     |     |     |     |   |    |     |     |     |     |     |     |     |     |    |     |  |  |  |  |  |  |  |  |  |  |  |  |  |  |  |  |  |  |  |     |     |     |     |    |    |     |     |     |     |     |     |     |     |     |     |    |    |   |  |  |  |  |  |  |  |  |  |  |  |  |  |  |  |  |  |  |     |     |   |     |     |     |    |     |     |     |     |     |     |     |  |  |  |  |  |  |  |  |  |  |  |  |  |  |  |  |  |  |  |  |  |  |  |     |     |     |     |     |     |     |     |     |     |     |     |    |    |   |  |  |  |  |  |  |  |  |  |  |  |  |  |  |  |  |  |  |  |  |     |     |     |     |     |     |   |     |     |     |     |     |  |  |  |  |  |  |  |  |  |  |  |  |  |  |  |  |  |  |  |  |  |  |  |  |  |  |     |     |     |    |     |     |     |     |     |    |    |    |  |  |  |  |  |  |  |  |  |  |  |  |  |  |  |  |  |  |  |  |  |  |     |     |   |    |   |     |     |     |     |     |  |  |  |  |  |  |  |  |  |  |  |  |  |  |  |  |  |  |  |  |  |  |  |  |  |  |     |  |  |     |     |     |     |     |     |    |    |    |  |  |  |  |  |  |  |  |  |  |  |  |  |  |  |  |  |  |  |  |  |  |     |     |   |    |     |     |   |     |     |     |     |     |   |    |   |  |  |  |  |  |  |  |  |  |  |  |  |  |  |  |  |  |  |  |  |  |     |  |  |  |     |  |     |     |     |    |     |    |  |  |  |  |  |  |  |  |  |  |  |  |  |  |  |  |  |  |  |  |  |  |     |     |   |    |   |  |  |     |     |     |     |     |     |    |    |    |  |  |  |  |  |  |  |  |  |  |  |  |  |  |  |  |  |  |  |  |     |  |  |  |  |  |     |     |     |   |     |     |  |  |  |  |  |  |  |  |  |  |  |  |  |  |  |  |  |  |  |  |  |  |     |     |   |    |    |  |  |  |  |     |     |     |     |    |     |     |   |    |    |  |  |  |  |  |  |  |  |  |  |  |  |  |  |  |  |  |     |  |  |  |  |  |  |     |  |     |     |     |     |     |     |   |    |    |  |  |  |  |  |  |  |  |  |  |  |  |  |  |  |  |     |     |   |    |   |  |  |  |     |     |     |     |     |    |     |     |  |     |     |   |    |   |  |  |  |  |  |  |  |  |  |  |  |  |  |  |     |  |  |  |  |  |  |  |  |  |     |     |     |     |     |   |    |     |   |    |    |  |  |  |  |  |  |  |  |  |  |  |  |  |     |  |  |  |  |  |  |  |  |     |  |     |     |   |    |     |  |     |     |  |  |  |  |  |  |  |  |  |  |  |  |  |  |  |  |     |     |   |    |    |  |  |  |  |  |     |     |     |   |     |     |   |    |    |  |     |     |   |    |    |  |  |  |  |  |  |  |  |  |  |  |     |  |  |  |  |  |  |  |  |     |  |  |  |  |     |  |  |  |  |  |     |  |  |  |  |  |  |  |  |  |  |  |  |  |     |  |  |  |  |  |  |  |  |  |  |  |  |  |     |     |   |    |    |  |     |  |  |     |     |   |    |    |  |  |  |  |  |  |     |     |     |   |    |    |  |  |  |  |  |  |  |  |  |  |     |  |     |     |   |    |   |     |     |     |   |    |    |  |  |  |  |  |  |  |  |     |  |  |  |  |  |  |  |  |  |  |  |     |     |     |   |    |     |  |  |  |     |  |     |  |  |  |  |  |  |  |  |  |  |     |     |   |    |    |  |  |  |  |  |  |  |  |  |  |     |  |     |     |   |    |    |  |  |  |  |     |     |   |    |    |  |  |  |  |  |     |  |  |  |  |  |  |  |  |  |  |  |  |     |  |  |  |     |  |  |  |  |  |  |  |  |     |  |  |  |  |  |  |  |     |     |   |    |   |  |  |  |  |  |  |  |  |  |     |     |     |     |     |   |    |    |  |  |  |     |  |  |  |     |     |   |    |   |  |  |     |  |  |  |  |  |  |  |  |  |  |  |  |  |  |  |  |     |  |  |  |  |  |  |  |  |  |  |  |     |  |  |  |  |     |  |  |  |  |  |  |  |  |  |  |  |  |  |  |  |     |     |     |   |    |    |  |  |  |  |  |  |  |     |  |  |  |  |  |     |     |   |    |   |  |  |  |  |  |  |  |  |  |  |  |  |  |     |  |  |  |  |  |  |  |  |  |  |  |  |  |     |     |   |    |     |  |  |  |  |  |  |  |  |  |  |  |  |  |  |     |  |  |  |  |  |  |  |  |  |  |  |  |  |  |  |  |     |  |     |     |   |    |    |  |  |  |  |  |  |  |  |  |  |  |  |  |  |  |  |  |  |  |  |  |  |  |  |  |  |  |  |  |  |     |     |   |    |    |  |  |  |  |  |  |  |  |  |  |  |  |  |  |  |  |  |  |  |  |  |  |  |  |  |  |  |  |  |     |
|            | 131       |     |     |                           |        |            |       |        |          |          |        |          |            |    |            |       |        |          |          |        |          |        |    |            |       |        |       |        |                                |          |          |        |          |        |    |     | yes |     |  |  |  |  |  |  |  |  |  |  |  |  |  |  |  |  |  |  |  |  |  |  |  |  |  |  |  |  |  |  |     |     |     |     |     |     |    |    |    |  |  |  |  |  |  |  |  |  |  |  |  |  |  |  |  |  |  |  |  |  |  |  |  |  |  |  |     |     |     |     |     |     |     |    |    |  |  |  |  |  |  |  |  |  |  |  |  |  |  |  |  |  |  |  |  |  |  |  |  |  |     |     |     |     |    |     |     |     |     |    |    |    |  |  |  |  |  |  |  |  |  |  |  |  |  |  |  |  |  |  |  |  |  |  |  |  |  |     |     |     |     |     |     |    |    |     |     |  |  |  |  |  |  |  |  |  |  |  |  |  |  |  |  |  |  |  |  |  |  |  |     |     |     |     |    |     |     |     |     |     |     |     |    |    |    |  |  |  |  |  |  |  |  |  |  |  |  |  |  |  |  |  |  |  |  |  |  |     |     |     |     |     |    |     |     |     |     |    |     |     |  |  |  |  |  |  |  |  |  |  |  |  |  |  |  |  |  |  |  |  |  |     |     |     |    |     |     |     |     |     |    |    |     |     |     |   |    |    |  |  |  |  |  |  |  |  |  |  |  |  |  |  |  |  |  |  |  |     |     |     |     |     |     |     |     |    |     |     |     |     |    |    |     |  |  |  |  |  |  |  |  |  |  |  |  |  |  |  |  |  |  |     |     |     |    |     |     |     |     |     |    |    |    |  |  |  |     |     |   |    |   |  |  |  |  |  |  |  |  |  |  |  |  |  |  |  |  |     |     |     |     |     |     |     |     |    |  |  |  |  |     |     |     |     |    |     |    |  |  |  |  |  |  |  |  |  |  |  |  |  |  |     |     |   |    |     |     |     |     |     |     |    |    |    |     |     |     |   |    |     |     |     |    |   |  |  |  |  |  |  |  |  |  |  |  |  |     |     |     |     |     |     |     |     |     |     |     |   |    |   |  |  |     |  |     |     |     |   |     |    |  |  |  |  |  |  |  |  |  |  |  |     |     |     |    |     |     |     |     |     |     |     |     |    |  |  |  |  |     |     |     |     |     |     |     |    |   |  |  |  |  |  |  |  |  |  |  |     |     |     |     |     |     |     |     |     |     |     |     |    |    |    |  |  |  |  |  |     |     |     |   |     |    |  |  |  |  |  |  |  |  |     |     |   |     |     |     |     |     |     |     |     |     |     |  |  |  |  |  |  |     |  |     |     |     |     |     |     |    |    |  |  |  |  |  |  |  |     |     |     |     |     |     |     |     |     |     |     |     |    |    |    |  |  |  |  |  |  |  |  |     |     |     |   |     |   |  |  |  |  |  |     |  |  |     |     |     |     |     |     |     |     |    |     |  |  |  |  |  |  |  |  |  |  |     |     |     |     |     |     |     |    |   |  |  |  |  |     |     |     |     |     |     |     |     |     |     |     |     |    |    |    |  |  |  |  |  |  |  |  |  |  |  |  |     |     |   |     |   |  |  |  |  |  |     |     |     |     |     |     |     |     |    |     |  |  |  |  |  |  |  |  |  |  |  |  |  |  |     |     |     |     |    |     |  |  |  |  |  |     |     |     |     |     |     |     |     |     |     |    |    |    |  |  |  |  |  |  |  |  |  |  |  |     |     |     |     |     |     |    |    |   |  |     |     |     |     |     |     |     |     |     |    |     |  |  |  |  |  |  |  |  |  |  |  |  |  |  |  |  |  |  |     |     |   |     |     |  |  |  |     |     |     |     |     |     |     |     |     |    |    |    |  |  |  |  |  |  |  |  |  |  |  |  |  |  |  |     |     |     |     |     |   |    |     |     |     |     |     |     |     |     |    |     |  |  |  |  |  |  |  |  |  |  |  |  |  |  |  |  |  |  |  |     |     |     |     |    |    |     |     |     |     |     |     |     |     |     |     |    |    |   |  |  |  |  |  |  |  |  |  |  |  |  |  |  |  |  |  |  |     |     |   |     |     |     |    |     |     |     |     |     |     |     |  |  |  |  |  |  |  |  |  |  |  |  |  |  |  |  |  |  |  |  |  |  |  |     |     |     |     |     |     |     |     |     |     |     |     |    |    |   |  |  |  |  |  |  |  |  |  |  |  |  |  |  |  |  |  |  |  |  |     |     |     |     |     |     |   |     |     |     |     |     |  |  |  |  |  |  |  |  |  |  |  |  |  |  |  |  |  |  |  |  |  |  |  |  |  |  |     |     |     |    |     |     |     |     |     |    |    |    |  |  |  |  |  |  |  |  |  |  |  |  |  |  |  |  |  |  |  |  |  |  |     |     |   |    |   |     |     |     |     |     |  |  |  |  |  |  |  |  |  |  |  |  |  |  |  |  |  |  |  |  |  |  |  |  |  |  |     |  |  |     |     |     |     |     |     |    |    |    |  |  |  |  |  |  |  |  |  |  |  |  |  |  |  |  |  |  |  |  |  |  |     |     |   |    |     |     |   |     |     |     |     |     |   |    |   |  |  |  |  |  |  |  |  |  |  |  |  |  |  |  |  |  |  |  |  |  |     |  |  |  |     |  |     |     |     |    |     |    |  |  |  |  |  |  |  |  |  |  |  |  |  |  |  |  |  |  |  |  |  |  |     |     |   |    |   |  |  |     |     |     |     |     |     |    |    |    |  |  |  |  |  |  |  |  |  |  |  |  |  |  |  |  |  |  |  |  |     |  |  |  |  |  |     |     |     |   |     |     |  |  |  |  |  |  |  |  |  |  |  |  |  |  |  |  |  |  |  |  |  |  |     |     |   |    |    |  |  |  |  |     |     |     |     |    |     |     |   |    |    |  |  |  |  |  |  |  |  |  |  |  |  |  |  |  |  |  |     |  |  |  |  |  |  |     |  |     |     |     |     |     |     |   |    |    |  |  |  |  |  |  |  |  |  |  |  |  |  |  |  |  |     |     |   |    |   |  |  |  |     |     |     |     |     |    |     |     |  |     |     |   |    |   |  |  |  |  |  |  |  |  |  |  |  |  |  |  |     |  |  |  |  |  |  |  |  |  |     |     |     |     |     |   |    |     |   |    |    |  |  |  |  |  |  |  |  |  |  |  |  |  |     |  |  |  |  |  |  |  |  |     |  |     |     |   |    |     |  |     |     |  |  |  |  |  |  |  |  |  |  |  |  |  |  |  |  |     |     |   |    |    |  |  |  |  |  |     |     |     |   |     |     |   |    |    |  |     |     |   |    |    |  |  |  |  |  |  |  |  |  |  |  |     |  |  |  |  |  |  |  |  |     |  |  |  |  |     |  |  |  |  |  |     |  |  |  |  |  |  |  |  |  |  |  |  |  |     |  |  |  |  |  |  |  |  |  |  |  |  |  |     |     |   |    |    |  |     |  |  |     |     |   |    |    |  |  |  |  |  |  |     |     |     |   |    |    |  |  |  |  |  |  |  |  |  |  |     |  |     |     |   |    |   |     |     |     |   |    |    |  |  |  |  |  |  |  |  |     |  |  |  |  |  |  |  |  |  |  |  |     |     |     |   |    |     |  |  |  |     |  |     |  |  |  |  |  |  |  |  |  |  |     |     |   |    |    |  |  |  |  |  |  |  |  |  |  |     |  |     |     |   |    |    |  |  |  |  |     |     |   |    |    |  |  |  |  |  |     |  |  |  |  |  |  |  |  |  |  |  |  |     |  |  |  |     |  |  |  |  |  |  |  |  |     |  |  |  |  |  |  |  |     |     |   |    |   |  |  |  |  |  |  |  |  |  |     |     |     |     |     |   |    |    |  |  |  |     |  |  |  |     |     |   |    |   |  |  |     |  |  |  |  |  |  |  |  |  |  |  |  |  |  |  |  |     |  |  |  |  |  |  |  |  |  |  |  |     |  |  |  |  |     |  |  |  |  |  |  |  |  |  |  |  |  |  |  |  |     |     |     |   |    |    |  |  |  |  |  |  |  |     |  |  |  |  |  |     |     |   |    |   |  |  |  |  |  |  |  |  |  |  |  |  |  |     |  |  |  |  |  |  |  |  |  |  |  |  |  |     |     |   |    |     |  |  |  |  |  |  |  |  |  |  |  |  |  |  |     |  |  |  |  |  |  |  |  |  |  |  |  |  |  |  |  |     |  |     |     |   |    |    |  |  |  |  |  |  |  |  |  |  |  |  |  |  |  |  |  |  |  |  |  |  |  |  |  |  |  |  |  |  |     |     |   |    |    |  |  |  |  |  |  |  |  |  |  |  |  |  |  |  |  |  |  |  |  |  |  |  |  |  |  |  |  |  |     |
| 083        | 020       | M   | 67  | 18                        |        |            |       |        |          |          |        |          |            |    |            |       |        |          |          |        |          |        |    |            |       |        |       |        |                                |          |          |        |          |        |    | 088 |     |     |  |  |  |  |  |  |  |  |  |  |  |  |  |  |  |  |  |  |  |  |  |  |  |  |  |  |  |  |  |  |     | 084 | 012 | M   | 45  | 23  |    |    |    |  |  |  |  |  |  |  |  |  |  |  |  |  |  |  |  |  |  |  |  |  |  |  |  |  |  |  |     | 021 |     |     |     |     |     |    |    |  |  |  |  |  |  |  |  |  |  |  |  |  |  |  |  |  |  |  |  |  |  |  |  |  |     | 142 | 399 | M   | 73 | 7   |     |     |     |    |    |    |  |  |  |  |  |  |  |  |  |  |  |  |  |  |  |  |  |  |  |  |  |  |  |  |  | 427 |     |     |     |     |     |    |    |     |     |  |  |  |  |  |  |  |  |  |  |  |  |  |  |  |  |  |  |  |  |  |  |  |     | 505 |     |     |    |     |     |     |     |     |     |     |    |    |    |  |  |  |  |  |  |  |  |  |  |  |  |  |  |  |  |  |  |  |  |  |  |     |     | 153 | 444 | F   | 85 | 9   |     |     |     |    |     |     |  |  |  |  |  |  |  |  |  |  |  |  |  |  |  |  |  |  |  |  |  |     |     |     |    | 511 |     |     |     |     |    |    |     |     |     |   |    |    |  |  |  |  |  |  |  |  |  |  |  |  |  |  |  |  |  |  |  |     |     | 163 | 361 | F   | 47  | 23  |     |    |     |     |     |     |    |    |     |  |  |  |  |  |  |  |  |  |  |  |  |  |  |  |  |  |  |     |     |     |    | 424 |     |     |     |     |    |    |    |  |  |  |     |     |   |    |   |  |  |  |  |  |  |  |  |  |  |  |  |  |  |  |  |     | yes |     |     |     |     |     |     |    |  |  |  |  |     |     |     |     |    |     |    |  |  |  |  |  |  |  |  |  |  |  |  |  |  |     |     |   |    |     |     |     |     |     |     |    |    |    |     |     |     |   |    |     |     |     |    |   |  |  |  |  |  |  |  |  |  |  |  |  |     |     |     |     |     |     |     |     |     |     |     |   |    |   |  |  |     |  |     |     |     |   |     |    |  |  |  |  |  |  |  |  |  |  |  |     |     |     |    |     |     |     |     |     |     |     |     |    |  |  |  |  |     |     |     |     |     |     |     |    |   |  |  |  |  |  |  |  |  |  |  |     |     |     |     |     |     |     |     |     |     |     |     |    |    |    |  |  |  |  |  |     |     |     |   |     |    |  |  |  |  |  |  |  |  |     |     |   |     |     |     |     |     |     |     |     |     |     |  |  |  |  |  |  |     |  |     |     |     |     |     |     |    |    |  |  |  |  |  |  |  |     |     |     |     |     |     |     |     |     |     |     |     |    |    |    |  |  |  |  |  |  |  |  |     |     |     |   |     |   |  |  |  |  |  |     |  |  |     |     |     |     |     |     |     |     |    |     |  |  |  |  |  |  |  |  |  |  |     |     |     |     |     |     |     |    |   |  |  |  |  |     |     |     |     |     |     |     |     |     |     |     |     |    |    |    |  |  |  |  |  |  |  |  |  |  |  |  |     |     |   |     |   |  |  |  |  |  |     |     |     |     |     |     |     |     |    |     |  |  |  |  |  |  |  |  |  |  |  |  |  |  |     |     |     |     |    |     |  |  |  |  |  |     |     |     |     |     |     |     |     |     |     |    |    |    |  |  |  |  |  |  |  |  |  |  |  |     |     |     |     |     |     |    |    |   |  |     |     |     |     |     |     |     |     |     |    |     |  |  |  |  |  |  |  |  |  |  |  |  |  |  |  |  |  |  |     |     |   |     |     |  |  |  |     |     |     |     |     |     |     |     |     |    |    |    |  |  |  |  |  |  |  |  |  |  |  |  |  |  |  |     |     |     |     |     |   |    |     |     |     |     |     |     |     |     |    |     |  |  |  |  |  |  |  |  |  |  |  |  |  |  |  |  |  |  |  |     |     |     |     |    |    |     |     |     |     |     |     |     |     |     |     |    |    |   |  |  |  |  |  |  |  |  |  |  |  |  |  |  |  |  |  |  |     |     |   |     |     |     |    |     |     |     |     |     |     |     |  |  |  |  |  |  |  |  |  |  |  |  |  |  |  |  |  |  |  |  |  |  |  |     |     |     |     |     |     |     |     |     |     |     |     |    |    |   |  |  |  |  |  |  |  |  |  |  |  |  |  |  |  |  |  |  |  |  |     |     |     |     |     |     |   |     |     |     |     |     |  |  |  |  |  |  |  |  |  |  |  |  |  |  |  |  |  |  |  |  |  |  |  |  |  |  |     |     |     |    |     |     |     |     |     |    |    |    |  |  |  |  |  |  |  |  |  |  |  |  |  |  |  |  |  |  |  |  |  |  |     |     |   |    |   |     |     |     |     |     |  |  |  |  |  |  |  |  |  |  |  |  |  |  |  |  |  |  |  |  |  |  |  |  |  |  |     |  |  |     |     |     |     |     |     |    |    |    |  |  |  |  |  |  |  |  |  |  |  |  |  |  |  |  |  |  |  |  |  |  |     |     |   |    |     |     |   |     |     |     |     |     |   |    |   |  |  |  |  |  |  |  |  |  |  |  |  |  |  |  |  |  |  |  |  |  |     |  |  |  |     |  |     |     |     |    |     |    |  |  |  |  |  |  |  |  |  |  |  |  |  |  |  |  |  |  |  |  |  |  |     |     |   |    |   |  |  |     |     |     |     |     |     |    |    |    |  |  |  |  |  |  |  |  |  |  |  |  |  |  |  |  |  |  |  |  |     |  |  |  |  |  |     |     |     |   |     |     |  |  |  |  |  |  |  |  |  |  |  |  |  |  |  |  |  |  |  |  |  |  |     |     |   |    |    |  |  |  |  |     |     |     |     |    |     |     |   |    |    |  |  |  |  |  |  |  |  |  |  |  |  |  |  |  |  |  |     |  |  |  |  |  |  |     |  |     |     |     |     |     |     |   |    |    |  |  |  |  |  |  |  |  |  |  |  |  |  |  |  |  |     |     |   |    |   |  |  |  |     |     |     |     |     |    |     |     |  |     |     |   |    |   |  |  |  |  |  |  |  |  |  |  |  |  |  |  |     |  |  |  |  |  |  |  |  |  |     |     |     |     |     |   |    |     |   |    |    |  |  |  |  |  |  |  |  |  |  |  |  |  |     |  |  |  |  |  |  |  |  |     |  |     |     |   |    |     |  |     |     |  |  |  |  |  |  |  |  |  |  |  |  |  |  |  |  |     |     |   |    |    |  |  |  |  |  |     |     |     |   |     |     |   |    |    |  |     |     |   |    |    |  |  |  |  |  |  |  |  |  |  |  |     |  |  |  |  |  |  |  |  |     |  |  |  |  |     |  |  |  |  |  |     |  |  |  |  |  |  |  |  |  |  |  |  |  |     |  |  |  |  |  |  |  |  |  |  |  |  |  |     |     |   |    |    |  |     |  |  |     |     |   |    |    |  |  |  |  |  |  |     |     |     |   |    |    |  |  |  |  |  |  |  |  |  |  |     |  |     |     |   |    |   |     |     |     |   |    |    |  |  |  |  |  |  |  |  |     |  |  |  |  |  |  |  |  |  |  |  |     |     |     |   |    |     |  |  |  |     |  |     |  |  |  |  |  |  |  |  |  |  |     |     |   |    |    |  |  |  |  |  |  |  |  |  |  |     |  |     |     |   |    |    |  |  |  |  |     |     |   |    |    |  |  |  |  |  |     |  |  |  |  |  |  |  |  |  |  |  |  |     |  |  |  |     |  |  |  |  |  |  |  |  |     |  |  |  |  |  |  |  |     |     |   |    |   |  |  |  |  |  |  |  |  |  |     |     |     |     |     |   |    |    |  |  |  |     |  |  |  |     |     |   |    |   |  |  |     |  |  |  |  |  |  |  |  |  |  |  |  |  |  |  |  |     |  |  |  |  |  |  |  |  |  |  |  |     |  |  |  |  |     |  |  |  |  |  |  |  |  |  |  |  |  |  |  |  |     |     |     |   |    |    |  |  |  |  |  |  |  |     |  |  |  |  |  |     |     |   |    |   |  |  |  |  |  |  |  |  |  |  |  |  |  |     |  |  |  |  |  |  |  |  |  |  |  |  |  |     |     |   |    |     |  |  |  |  |  |  |  |  |  |  |  |  |  |  |     |  |  |  |  |  |  |  |  |  |  |  |  |  |  |  |  |     |  |     |     |   |    |    |  |  |  |  |  |  |  |  |  |  |  |  |  |  |  |  |  |  |  |  |  |  |  |  |  |  |  |  |  |  |     |     |   |    |    |  |  |  |  |  |  |  |  |  |  |  |  |  |  |  |  |  |  |  |  |  |  |  |  |  |  |  |  |  |     |
|            | 088       |     |     |                           |        |            |       |        |          |          |        |          |            |    |            |       |        |          |          |        |          |        |    |            |       |        |       |        |                                |          |          |        |          |        |    |     |     |     |  |  |  |  |  |  |  |  |  |  |  |  |  |  |  |  |  |  |  |  |  |  |  |  |  |  |  |  |  |  |     |     |     |     |     |     |    |    |    |  |  |  |  |  |  |  |  |  |  |  |  |  |  |  |  |  |  |  |  |  |  |  |  |  |  |  |     |     |     |     |     |     |     |    |    |  |  |  |  |  |  |  |  |  |  |  |  |  |  |  |  |  |  |  |  |  |  |  |  |  |     |     |     |     |    |     |     |     |     |    |    |    |  |  |  |  |  |  |  |  |  |  |  |  |  |  |  |  |  |  |  |  |  |  |  |  |  |     |     |     |     |     |     |    |    |     |     |  |  |  |  |  |  |  |  |  |  |  |  |  |  |  |  |  |  |  |  |  |  |  |     |     |     |     |    |     |     |     |     |     |     |     |    |    |    |  |  |  |  |  |  |  |  |  |  |  |  |  |  |  |  |  |  |  |  |  |  |     |     |     |     |     |    |     |     |     |     |    |     |     |  |  |  |  |  |  |  |  |  |  |  |  |  |  |  |  |  |  |  |  |  |     |     |     |    |     |     |     |     |     |    |    |     |     |     |   |    |    |  |  |  |  |  |  |  |  |  |  |  |  |  |  |  |  |  |  |  |     |     |     |     |     |     |     |     |    |     |     |     |     |    |    |     |  |  |  |  |  |  |  |  |  |  |  |  |  |  |  |  |  |  |     |     |     |    |     |     |     |     |     |    |    |    |  |  |  |     |     |   |    |   |  |  |  |  |  |  |  |  |  |  |  |  |  |  |  |  |     |     |     |     |     |     |     |     |    |  |  |  |  |     |     |     |     |    |     |    |  |  |  |  |  |  |  |  |  |  |  |  |  |  |     |     |   |    |     |     |     |     |     |     |    |    |    |     |     |     |   |    |     |     |     |    |   |  |  |  |  |  |  |  |  |  |  |  |  |     |     |     |     |     |     |     |     |     |     |     |   |    |   |  |  |     |  |     |     |     |   |     |    |  |  |  |  |  |  |  |  |  |  |  |     |     |     |    |     |     |     |     |     |     |     |     |    |  |  |  |  |     |     |     |     |     |     |     |    |   |  |  |  |  |  |  |  |  |  |  |     |     |     |     |     |     |     |     |     |     |     |     |    |    |    |  |  |  |  |  |     |     |     |   |     |    |  |  |  |  |  |  |  |  |     |     |   |     |     |     |     |     |     |     |     |     |     |  |  |  |  |  |  |     |  |     |     |     |     |     |     |    |    |  |  |  |  |  |  |  |     |     |     |     |     |     |     |     |     |     |     |     |    |    |    |  |  |  |  |  |  |  |  |     |     |     |   |     |   |  |  |  |  |  |     |  |  |     |     |     |     |     |     |     |     |    |     |  |  |  |  |  |  |  |  |  |  |     |     |     |     |     |     |     |    |   |  |  |  |  |     |     |     |     |     |     |     |     |     |     |     |     |    |    |    |  |  |  |  |  |  |  |  |  |  |  |  |     |     |   |     |   |  |  |  |  |  |     |     |     |     |     |     |     |     |    |     |  |  |  |  |  |  |  |  |  |  |  |  |  |  |     |     |     |     |    |     |  |  |  |  |  |     |     |     |     |     |     |     |     |     |     |    |    |    |  |  |  |  |  |  |  |  |  |  |  |     |     |     |     |     |     |    |    |   |  |     |     |     |     |     |     |     |     |     |    |     |  |  |  |  |  |  |  |  |  |  |  |  |  |  |  |  |  |  |     |     |   |     |     |  |  |  |     |     |     |     |     |     |     |     |     |    |    |    |  |  |  |  |  |  |  |  |  |  |  |  |  |  |  |     |     |     |     |     |   |    |     |     |     |     |     |     |     |     |    |     |  |  |  |  |  |  |  |  |  |  |  |  |  |  |  |  |  |  |  |     |     |     |     |    |    |     |     |     |     |     |     |     |     |     |     |    |    |   |  |  |  |  |  |  |  |  |  |  |  |  |  |  |  |  |  |  |     |     |   |     |     |     |    |     |     |     |     |     |     |     |  |  |  |  |  |  |  |  |  |  |  |  |  |  |  |  |  |  |  |  |  |  |  |     |     |     |     |     |     |     |     |     |     |     |     |    |    |   |  |  |  |  |  |  |  |  |  |  |  |  |  |  |  |  |  |  |  |  |     |     |     |     |     |     |   |     |     |     |     |     |  |  |  |  |  |  |  |  |  |  |  |  |  |  |  |  |  |  |  |  |  |  |  |  |  |  |     |     |     |    |     |     |     |     |     |    |    |    |  |  |  |  |  |  |  |  |  |  |  |  |  |  |  |  |  |  |  |  |  |  |     |     |   |    |   |     |     |     |     |     |  |  |  |  |  |  |  |  |  |  |  |  |  |  |  |  |  |  |  |  |  |  |  |  |  |  |     |  |  |     |     |     |     |     |     |    |    |    |  |  |  |  |  |  |  |  |  |  |  |  |  |  |  |  |  |  |  |  |  |  |     |     |   |    |     |     |   |     |     |     |     |     |   |    |   |  |  |  |  |  |  |  |  |  |  |  |  |  |  |  |  |  |  |  |  |  |     |  |  |  |     |  |     |     |     |    |     |    |  |  |  |  |  |  |  |  |  |  |  |  |  |  |  |  |  |  |  |  |  |  |     |     |   |    |   |  |  |     |     |     |     |     |     |    |    |    |  |  |  |  |  |  |  |  |  |  |  |  |  |  |  |  |  |  |  |  |     |  |  |  |  |  |     |     |     |   |     |     |  |  |  |  |  |  |  |  |  |  |  |  |  |  |  |  |  |  |  |  |  |  |     |     |   |    |    |  |  |  |  |     |     |     |     |    |     |     |   |    |    |  |  |  |  |  |  |  |  |  |  |  |  |  |  |  |  |  |     |  |  |  |  |  |  |     |  |     |     |     |     |     |     |   |    |    |  |  |  |  |  |  |  |  |  |  |  |  |  |  |  |  |     |     |   |    |   |  |  |  |     |     |     |     |     |    |     |     |  |     |     |   |    |   |  |  |  |  |  |  |  |  |  |  |  |  |  |  |     |  |  |  |  |  |  |  |  |  |     |     |     |     |     |   |    |     |   |    |    |  |  |  |  |  |  |  |  |  |  |  |  |  |     |  |  |  |  |  |  |  |  |     |  |     |     |   |    |     |  |     |     |  |  |  |  |  |  |  |  |  |  |  |  |  |  |  |  |     |     |   |    |    |  |  |  |  |  |     |     |     |   |     |     |   |    |    |  |     |     |   |    |    |  |  |  |  |  |  |  |  |  |  |  |     |  |  |  |  |  |  |  |  |     |  |  |  |  |     |  |  |  |  |  |     |  |  |  |  |  |  |  |  |  |  |  |  |  |     |  |  |  |  |  |  |  |  |  |  |  |  |  |     |     |   |    |    |  |     |  |  |     |     |   |    |    |  |  |  |  |  |  |     |     |     |   |    |    |  |  |  |  |  |  |  |  |  |  |     |  |     |     |   |    |   |     |     |     |   |    |    |  |  |  |  |  |  |  |  |     |  |  |  |  |  |  |  |  |  |  |  |     |     |     |   |    |     |  |  |  |     |  |     |  |  |  |  |  |  |  |  |  |  |     |     |   |    |    |  |  |  |  |  |  |  |  |  |  |     |  |     |     |   |    |    |  |  |  |  |     |     |   |    |    |  |  |  |  |  |     |  |  |  |  |  |  |  |  |  |  |  |  |     |  |  |  |     |  |  |  |  |  |  |  |  |     |  |  |  |  |  |  |  |     |     |   |    |   |  |  |  |  |  |  |  |  |  |     |     |     |     |     |   |    |    |  |  |  |     |  |  |  |     |     |   |    |   |  |  |     |  |  |  |  |  |  |  |  |  |  |  |  |  |  |  |  |     |  |  |  |  |  |  |  |  |  |  |  |     |  |  |  |  |     |  |  |  |  |  |  |  |  |  |  |  |  |  |  |  |     |     |     |   |    |    |  |  |  |  |  |  |  |     |  |  |  |  |  |     |     |   |    |   |  |  |  |  |  |  |  |  |  |  |  |  |  |     |  |  |  |  |  |  |  |  |  |  |  |  |  |     |     |   |    |     |  |  |  |  |  |  |  |  |  |  |  |  |  |  |     |  |  |  |  |  |  |  |  |  |  |  |  |  |  |  |  |     |  |     |     |   |    |    |  |  |  |  |  |  |  |  |  |  |  |  |  |  |  |  |  |  |  |  |  |  |  |  |  |  |  |  |  |  |     |     |   |    |    |  |  |  |  |  |  |  |  |  |  |  |  |  |  |  |  |  |  |  |  |  |  |  |  |  |  |  |  |  |     |
| 084        | 012       | M   | 45  | 23                        |        |            |       |        |          |          |        |          |            |    |            |       |        |          |          |        |          |        |    |            |       |        |       |        |                                |          |          |        |          |        |    | 021 |     |     |  |  |  |  |  |  |  |  |  |  |  |  |  |  |  |  |  |  |  |  |  |  |  |  |  |  |  |  |  |  |     | 142 | 399 | M   | 73  | 7   |    |    |    |  |  |  |  |  |  |  |  |  |  |  |  |  |  |  |  |  |  |  |  |  |  |  |  |  |  |  |     | 427 |     |     |     |     |     |    |    |  |  |  |  |  |  |  |  |  |  |  |  |  |  |  |  |  |  |  |  |  |  |  |  |  |     |     | 505 |     |    |     |     |     |     |    |    |    |  |  |  |  |  |  |  |  |  |  |  |  |  |  |  |  |  |  |  |  |  |  |  |  |  |     |     | 153 | 444 | F   | 85  | 9  |    |     |     |  |  |  |  |  |  |  |  |  |  |  |  |  |  |  |  |  |  |  |  |  |  |  |     |     |     |     |    | 511 |     |     |     |     |     |     |    |    |    |  |  |  |  |  |  |  |  |  |  |  |  |  |  |  |  |  |  |  |  |  |  |     |     | 163 | 361 | F   | 47 | 23  |     |     |     |    |     |     |  |  |  |  |  |  |  |  |  |  |  |  |  |  |  |  |  |  |  |  |  |     |     |     |    | 424 |     |     |     |     |    |    |     |     |     |   |    |    |  |  |  |  |  |  |  |  |  |  |  |  |  |  |  |  |  |  |  |     | yes |     |     |     |     |     |     |    |     |     |     |     |    |    |     |  |  |  |  |  |  |  |  |  |  |  |  |  |  |  |  |  |  |     |     |     |    |     |     |     |     |     |    |    |    |  |  |  |     |     |   |    |   |  |  |  |  |  |  |  |  |  |  |  |  |  |  |  |  |     |     |     |     |     |     |     |     |    |  |  |  |  |     |     |     |     |    |     |    |  |  |  |  |  |  |  |  |  |  |  |  |  |  |     |     |   |    |     |     |     |     |     |     |    |    |    |     |     |     |   |    |     |     |     |    |   |  |  |  |  |  |  |  |  |  |  |  |  |     |     |     |     |     |     |     |     |     |     |     |   |    |   |  |  |     |  |     |     |     |   |     |    |  |  |  |  |  |  |  |  |  |  |  |     |     |     |    |     |     |     |     |     |     |     |     |    |  |  |  |  |     |     |     |     |     |     |     |    |   |  |  |  |  |  |  |  |  |  |  |     |     |     |     |     |     |     |     |     |     |     |     |    |    |    |  |  |  |  |  |     |     |     |   |     |    |  |  |  |  |  |  |  |  |     |     |   |     |     |     |     |     |     |     |     |     |     |  |  |  |  |  |  |     |  |     |     |     |     |     |     |    |    |  |  |  |  |  |  |  |     |     |     |     |     |     |     |     |     |     |     |     |    |    |    |  |  |  |  |  |  |  |  |     |     |     |   |     |   |  |  |  |  |  |     |  |  |     |     |     |     |     |     |     |     |    |     |  |  |  |  |  |  |  |  |  |  |     |     |     |     |     |     |     |    |   |  |  |  |  |     |     |     |     |     |     |     |     |     |     |     |     |    |    |    |  |  |  |  |  |  |  |  |  |  |  |  |     |     |   |     |   |  |  |  |  |  |     |     |     |     |     |     |     |     |    |     |  |  |  |  |  |  |  |  |  |  |  |  |  |  |     |     |     |     |    |     |  |  |  |  |  |     |     |     |     |     |     |     |     |     |     |    |    |    |  |  |  |  |  |  |  |  |  |  |  |     |     |     |     |     |     |    |    |   |  |     |     |     |     |     |     |     |     |     |    |     |  |  |  |  |  |  |  |  |  |  |  |  |  |  |  |  |  |  |     |     |   |     |     |  |  |  |     |     |     |     |     |     |     |     |     |    |    |    |  |  |  |  |  |  |  |  |  |  |  |  |  |  |  |     |     |     |     |     |   |    |     |     |     |     |     |     |     |     |    |     |  |  |  |  |  |  |  |  |  |  |  |  |  |  |  |  |  |  |  |     |     |     |     |    |    |     |     |     |     |     |     |     |     |     |     |    |    |   |  |  |  |  |  |  |  |  |  |  |  |  |  |  |  |  |  |  |     |     |   |     |     |     |    |     |     |     |     |     |     |     |  |  |  |  |  |  |  |  |  |  |  |  |  |  |  |  |  |  |  |  |  |  |  |     |     |     |     |     |     |     |     |     |     |     |     |    |    |   |  |  |  |  |  |  |  |  |  |  |  |  |  |  |  |  |  |  |  |  |     |     |     |     |     |     |   |     |     |     |     |     |  |  |  |  |  |  |  |  |  |  |  |  |  |  |  |  |  |  |  |  |  |  |  |  |  |  |     |     |     |    |     |     |     |     |     |    |    |    |  |  |  |  |  |  |  |  |  |  |  |  |  |  |  |  |  |  |  |  |  |  |     |     |   |    |   |     |     |     |     |     |  |  |  |  |  |  |  |  |  |  |  |  |  |  |  |  |  |  |  |  |  |  |  |  |  |  |     |  |  |     |     |     |     |     |     |    |    |    |  |  |  |  |  |  |  |  |  |  |  |  |  |  |  |  |  |  |  |  |  |  |     |     |   |    |     |     |   |     |     |     |     |     |   |    |   |  |  |  |  |  |  |  |  |  |  |  |  |  |  |  |  |  |  |  |  |  |     |  |  |  |     |  |     |     |     |    |     |    |  |  |  |  |  |  |  |  |  |  |  |  |  |  |  |  |  |  |  |  |  |  |     |     |   |    |   |  |  |     |     |     |     |     |     |    |    |    |  |  |  |  |  |  |  |  |  |  |  |  |  |  |  |  |  |  |  |  |     |  |  |  |  |  |     |     |     |   |     |     |  |  |  |  |  |  |  |  |  |  |  |  |  |  |  |  |  |  |  |  |  |  |     |     |   |    |    |  |  |  |  |     |     |     |     |    |     |     |   |    |    |  |  |  |  |  |  |  |  |  |  |  |  |  |  |  |  |  |     |  |  |  |  |  |  |     |  |     |     |     |     |     |     |   |    |    |  |  |  |  |  |  |  |  |  |  |  |  |  |  |  |  |     |     |   |    |   |  |  |  |     |     |     |     |     |    |     |     |  |     |     |   |    |   |  |  |  |  |  |  |  |  |  |  |  |  |  |  |     |  |  |  |  |  |  |  |  |  |     |     |     |     |     |   |    |     |   |    |    |  |  |  |  |  |  |  |  |  |  |  |  |  |     |  |  |  |  |  |  |  |  |     |  |     |     |   |    |     |  |     |     |  |  |  |  |  |  |  |  |  |  |  |  |  |  |  |  |     |     |   |    |    |  |  |  |  |  |     |     |     |   |     |     |   |    |    |  |     |     |   |    |    |  |  |  |  |  |  |  |  |  |  |  |     |  |  |  |  |  |  |  |  |     |  |  |  |  |     |  |  |  |  |  |     |  |  |  |  |  |  |  |  |  |  |  |  |  |     |  |  |  |  |  |  |  |  |  |  |  |  |  |     |     |   |    |    |  |     |  |  |     |     |   |    |    |  |  |  |  |  |  |     |     |     |   |    |    |  |  |  |  |  |  |  |  |  |  |     |  |     |     |   |    |   |     |     |     |   |    |    |  |  |  |  |  |  |  |  |     |  |  |  |  |  |  |  |  |  |  |  |     |     |     |   |    |     |  |  |  |     |  |     |  |  |  |  |  |  |  |  |  |  |     |     |   |    |    |  |  |  |  |  |  |  |  |  |  |     |  |     |     |   |    |    |  |  |  |  |     |     |   |    |    |  |  |  |  |  |     |  |  |  |  |  |  |  |  |  |  |  |  |     |  |  |  |     |  |  |  |  |  |  |  |  |     |  |  |  |  |  |  |  |     |     |   |    |   |  |  |  |  |  |  |  |  |  |     |     |     |     |     |   |    |    |  |  |  |     |  |  |  |     |     |   |    |   |  |  |     |  |  |  |  |  |  |  |  |  |  |  |  |  |  |  |  |     |  |  |  |  |  |  |  |  |  |  |  |     |  |  |  |  |     |  |  |  |  |  |  |  |  |  |  |  |  |  |  |  |     |     |     |   |    |    |  |  |  |  |  |  |  |     |  |  |  |  |  |     |     |   |    |   |  |  |  |  |  |  |  |  |  |  |  |  |  |     |  |  |  |  |  |  |  |  |  |  |  |  |  |     |     |   |    |     |  |  |  |  |  |  |  |  |  |  |  |  |  |  |     |  |  |  |  |  |  |  |  |  |  |  |  |  |  |  |  |     |  |     |     |   |    |    |  |  |  |  |  |  |  |  |  |  |  |  |  |  |  |  |  |  |  |  |  |  |  |  |  |  |  |  |  |  |     |     |   |    |    |  |  |  |  |  |  |  |  |  |  |  |  |  |  |  |  |  |  |  |  |  |  |  |  |  |  |  |  |  |     |
|            | 021       |     |     |                           |        |            |       |        |          |          |        |          |            |    |            |       |        |          |          |        |          |        |    |            |       |        |       |        |                                |          |          |        |          |        |    |     |     |     |  |  |  |  |  |  |  |  |  |  |  |  |  |  |  |  |  |  |  |  |  |  |  |  |  |  |  |  |  |  |     |     |     |     |     |     |    |    |    |  |  |  |  |  |  |  |  |  |  |  |  |  |  |  |  |  |  |  |  |  |  |  |  |  |  |  |     |     |     |     |     |     |     |    |    |  |  |  |  |  |  |  |  |  |  |  |  |  |  |  |  |  |  |  |  |  |  |  |  |  |     |     |     |     |    |     |     |     |     |    |    |    |  |  |  |  |  |  |  |  |  |  |  |  |  |  |  |  |  |  |  |  |  |  |  |  |  |     |     |     |     |     |     |    |    |     |     |  |  |  |  |  |  |  |  |  |  |  |  |  |  |  |  |  |  |  |  |  |  |  |     |     |     |     |    |     |     |     |     |     |     |     |    |    |    |  |  |  |  |  |  |  |  |  |  |  |  |  |  |  |  |  |  |  |  |  |  |     |     |     |     |     |    |     |     |     |     |    |     |     |  |  |  |  |  |  |  |  |  |  |  |  |  |  |  |  |  |  |  |  |  |     |     |     |    |     |     |     |     |     |    |    |     |     |     |   |    |    |  |  |  |  |  |  |  |  |  |  |  |  |  |  |  |  |  |  |  |     |     |     |     |     |     |     |     |    |     |     |     |     |    |    |     |  |  |  |  |  |  |  |  |  |  |  |  |  |  |  |  |  |  |     |     |     |    |     |     |     |     |     |    |    |    |  |  |  |     |     |   |    |   |  |  |  |  |  |  |  |  |  |  |  |  |  |  |  |  |     |     |     |     |     |     |     |     |    |  |  |  |  |     |     |     |     |    |     |    |  |  |  |  |  |  |  |  |  |  |  |  |  |  |     |     |   |    |     |     |     |     |     |     |    |    |    |     |     |     |   |    |     |     |     |    |   |  |  |  |  |  |  |  |  |  |  |  |  |     |     |     |     |     |     |     |     |     |     |     |   |    |   |  |  |     |  |     |     |     |   |     |    |  |  |  |  |  |  |  |  |  |  |  |     |     |     |    |     |     |     |     |     |     |     |     |    |  |  |  |  |     |     |     |     |     |     |     |    |   |  |  |  |  |  |  |  |  |  |  |     |     |     |     |     |     |     |     |     |     |     |     |    |    |    |  |  |  |  |  |     |     |     |   |     |    |  |  |  |  |  |  |  |  |     |     |   |     |     |     |     |     |     |     |     |     |     |  |  |  |  |  |  |     |  |     |     |     |     |     |     |    |    |  |  |  |  |  |  |  |     |     |     |     |     |     |     |     |     |     |     |     |    |    |    |  |  |  |  |  |  |  |  |     |     |     |   |     |   |  |  |  |  |  |     |  |  |     |     |     |     |     |     |     |     |    |     |  |  |  |  |  |  |  |  |  |  |     |     |     |     |     |     |     |    |   |  |  |  |  |     |     |     |     |     |     |     |     |     |     |     |     |    |    |    |  |  |  |  |  |  |  |  |  |  |  |  |     |     |   |     |   |  |  |  |  |  |     |     |     |     |     |     |     |     |    |     |  |  |  |  |  |  |  |  |  |  |  |  |  |  |     |     |     |     |    |     |  |  |  |  |  |     |     |     |     |     |     |     |     |     |     |    |    |    |  |  |  |  |  |  |  |  |  |  |  |     |     |     |     |     |     |    |    |   |  |     |     |     |     |     |     |     |     |     |    |     |  |  |  |  |  |  |  |  |  |  |  |  |  |  |  |  |  |  |     |     |   |     |     |  |  |  |     |     |     |     |     |     |     |     |     |    |    |    |  |  |  |  |  |  |  |  |  |  |  |  |  |  |  |     |     |     |     |     |   |    |     |     |     |     |     |     |     |     |    |     |  |  |  |  |  |  |  |  |  |  |  |  |  |  |  |  |  |  |  |     |     |     |     |    |    |     |     |     |     |     |     |     |     |     |     |    |    |   |  |  |  |  |  |  |  |  |  |  |  |  |  |  |  |  |  |  |     |     |   |     |     |     |    |     |     |     |     |     |     |     |  |  |  |  |  |  |  |  |  |  |  |  |  |  |  |  |  |  |  |  |  |  |  |     |     |     |     |     |     |     |     |     |     |     |     |    |    |   |  |  |  |  |  |  |  |  |  |  |  |  |  |  |  |  |  |  |  |  |     |     |     |     |     |     |   |     |     |     |     |     |  |  |  |  |  |  |  |  |  |  |  |  |  |  |  |  |  |  |  |  |  |  |  |  |  |  |     |     |     |    |     |     |     |     |     |    |    |    |  |  |  |  |  |  |  |  |  |  |  |  |  |  |  |  |  |  |  |  |  |  |     |     |   |    |   |     |     |     |     |     |  |  |  |  |  |  |  |  |  |  |  |  |  |  |  |  |  |  |  |  |  |  |  |  |  |  |     |  |  |     |     |     |     |     |     |    |    |    |  |  |  |  |  |  |  |  |  |  |  |  |  |  |  |  |  |  |  |  |  |  |     |     |   |    |     |     |   |     |     |     |     |     |   |    |   |  |  |  |  |  |  |  |  |  |  |  |  |  |  |  |  |  |  |  |  |  |     |  |  |  |     |  |     |     |     |    |     |    |  |  |  |  |  |  |  |  |  |  |  |  |  |  |  |  |  |  |  |  |  |  |     |     |   |    |   |  |  |     |     |     |     |     |     |    |    |    |  |  |  |  |  |  |  |  |  |  |  |  |  |  |  |  |  |  |  |  |     |  |  |  |  |  |     |     |     |   |     |     |  |  |  |  |  |  |  |  |  |  |  |  |  |  |  |  |  |  |  |  |  |  |     |     |   |    |    |  |  |  |  |     |     |     |     |    |     |     |   |    |    |  |  |  |  |  |  |  |  |  |  |  |  |  |  |  |  |  |     |  |  |  |  |  |  |     |  |     |     |     |     |     |     |   |    |    |  |  |  |  |  |  |  |  |  |  |  |  |  |  |  |  |     |     |   |    |   |  |  |  |     |     |     |     |     |    |     |     |  |     |     |   |    |   |  |  |  |  |  |  |  |  |  |  |  |  |  |  |     |  |  |  |  |  |  |  |  |  |     |     |     |     |     |   |    |     |   |    |    |  |  |  |  |  |  |  |  |  |  |  |  |  |     |  |  |  |  |  |  |  |  |     |  |     |     |   |    |     |  |     |     |  |  |  |  |  |  |  |  |  |  |  |  |  |  |  |  |     |     |   |    |    |  |  |  |  |  |     |     |     |   |     |     |   |    |    |  |     |     |   |    |    |  |  |  |  |  |  |  |  |  |  |  |     |  |  |  |  |  |  |  |  |     |  |  |  |  |     |  |  |  |  |  |     |  |  |  |  |  |  |  |  |  |  |  |  |  |     |  |  |  |  |  |  |  |  |  |  |  |  |  |     |     |   |    |    |  |     |  |  |     |     |   |    |    |  |  |  |  |  |  |     |     |     |   |    |    |  |  |  |  |  |  |  |  |  |  |     |  |     |     |   |    |   |     |     |     |   |    |    |  |  |  |  |  |  |  |  |     |  |  |  |  |  |  |  |  |  |  |  |     |     |     |   |    |     |  |  |  |     |  |     |  |  |  |  |  |  |  |  |  |  |     |     |   |    |    |  |  |  |  |  |  |  |  |  |  |     |  |     |     |   |    |    |  |  |  |  |     |     |   |    |    |  |  |  |  |  |     |  |  |  |  |  |  |  |  |  |  |  |  |     |  |  |  |     |  |  |  |  |  |  |  |  |     |  |  |  |  |  |  |  |     |     |   |    |   |  |  |  |  |  |  |  |  |  |     |     |     |     |     |   |    |    |  |  |  |     |  |  |  |     |     |   |    |   |  |  |     |  |  |  |  |  |  |  |  |  |  |  |  |  |  |  |  |     |  |  |  |  |  |  |  |  |  |  |  |     |  |  |  |  |     |  |  |  |  |  |  |  |  |  |  |  |  |  |  |  |     |     |     |   |    |    |  |  |  |  |  |  |  |     |  |  |  |  |  |     |     |   |    |   |  |  |  |  |  |  |  |  |  |  |  |  |  |     |  |  |  |  |  |  |  |  |  |  |  |  |  |     |     |   |    |     |  |  |  |  |  |  |  |  |  |  |  |  |  |  |     |  |  |  |  |  |  |  |  |  |  |  |  |  |  |  |  |     |  |     |     |   |    |    |  |  |  |  |  |  |  |  |  |  |  |  |  |  |  |  |  |  |  |  |  |  |  |  |  |  |  |  |  |  |     |     |   |    |    |  |  |  |  |  |  |  |  |  |  |  |  |  |  |  |  |  |  |  |  |  |  |  |  |  |  |  |  |  |     |
| 142        | 399       | M   | 73  | 7                         |        |            |       |        |          |          |        |          |            |    |            |       |        |          |          |        |          |        |    |            |       |        |       |        |                                |          |          |        |          |        |    | 427 |     |     |  |  |  |  |  |  |  |  |  |  |  |  |  |  |  |  |  |  |  |  |  |  |  |  |  |  |  |  |  |  |     |     | 505 |     |     |     |    |    |    |  |  |  |  |  |  |  |  |  |  |  |  |  |  |  |  |  |  |  |  |  |  |  |  |  |  |  |     |     |     | 153 | 444 | F   | 85  | 9  |    |  |  |  |  |  |  |  |  |  |  |  |  |  |  |  |  |  |  |  |  |  |  |  |  |  |     |     |     |     |    | 511 |     |     |     |    |    |    |  |  |  |  |  |  |  |  |  |  |  |  |  |  |  |  |  |  |  |  |  |  |  |  |  |     |     | 163 | 361 | F   | 47  | 23 |    |     |     |  |  |  |  |  |  |  |  |  |  |  |  |  |  |  |  |  |  |  |  |  |  |  |     |     |     |     |    | 424 |     |     |     |     |     |     |    |    |    |  |  |  |  |  |  |  |  |  |  |  |  |  |  |  |  |  |  |  |  |  |  |     | yes |     |     |     |    |     |     |     |     |    |     |     |  |  |  |  |  |  |  |  |  |  |  |  |  |  |  |  |  |  |  |  |  |     |     |     |    |     |     |     |     |     |    |    |     |     |     |   |    |    |  |  |  |  |  |  |  |  |  |  |  |  |  |  |  |  |  |  |  |     |     |     |     |     |     |     |     |    |     |     |     |     |    |    |     |  |  |  |  |  |  |  |  |  |  |  |  |  |  |  |  |  |  |     |     |     |    |     |     |     |     |     |    |    |    |  |  |  |     |     |   |    |   |  |  |  |  |  |  |  |  |  |  |  |  |  |  |  |  |     |     |     |     |     |     |     |     |    |  |  |  |  |     |     |     |     |    |     |    |  |  |  |  |  |  |  |  |  |  |  |  |  |  |     |     |   |    |     |     |     |     |     |     |    |    |    |     |     |     |   |    |     |     |     |    |   |  |  |  |  |  |  |  |  |  |  |  |  |     |     |     |     |     |     |     |     |     |     |     |   |    |   |  |  |     |  |     |     |     |   |     |    |  |  |  |  |  |  |  |  |  |  |  |     |     |     |    |     |     |     |     |     |     |     |     |    |  |  |  |  |     |     |     |     |     |     |     |    |   |  |  |  |  |  |  |  |  |  |  |     |     |     |     |     |     |     |     |     |     |     |     |    |    |    |  |  |  |  |  |     |     |     |   |     |    |  |  |  |  |  |  |  |  |     |     |   |     |     |     |     |     |     |     |     |     |     |  |  |  |  |  |  |     |  |     |     |     |     |     |     |    |    |  |  |  |  |  |  |  |     |     |     |     |     |     |     |     |     |     |     |     |    |    |    |  |  |  |  |  |  |  |  |     |     |     |   |     |   |  |  |  |  |  |     |  |  |     |     |     |     |     |     |     |     |    |     |  |  |  |  |  |  |  |  |  |  |     |     |     |     |     |     |     |    |   |  |  |  |  |     |     |     |     |     |     |     |     |     |     |     |     |    |    |    |  |  |  |  |  |  |  |  |  |  |  |  |     |     |   |     |   |  |  |  |  |  |     |     |     |     |     |     |     |     |    |     |  |  |  |  |  |  |  |  |  |  |  |  |  |  |     |     |     |     |    |     |  |  |  |  |  |     |     |     |     |     |     |     |     |     |     |    |    |    |  |  |  |  |  |  |  |  |  |  |  |     |     |     |     |     |     |    |    |   |  |     |     |     |     |     |     |     |     |     |    |     |  |  |  |  |  |  |  |  |  |  |  |  |  |  |  |  |  |  |     |     |   |     |     |  |  |  |     |     |     |     |     |     |     |     |     |    |    |    |  |  |  |  |  |  |  |  |  |  |  |  |  |  |  |     |     |     |     |     |   |    |     |     |     |     |     |     |     |     |    |     |  |  |  |  |  |  |  |  |  |  |  |  |  |  |  |  |  |  |  |     |     |     |     |    |    |     |     |     |     |     |     |     |     |     |     |    |    |   |  |  |  |  |  |  |  |  |  |  |  |  |  |  |  |  |  |  |     |     |   |     |     |     |    |     |     |     |     |     |     |     |  |  |  |  |  |  |  |  |  |  |  |  |  |  |  |  |  |  |  |  |  |  |  |     |     |     |     |     |     |     |     |     |     |     |     |    |    |   |  |  |  |  |  |  |  |  |  |  |  |  |  |  |  |  |  |  |  |  |     |     |     |     |     |     |   |     |     |     |     |     |  |  |  |  |  |  |  |  |  |  |  |  |  |  |  |  |  |  |  |  |  |  |  |  |  |  |     |     |     |    |     |     |     |     |     |    |    |    |  |  |  |  |  |  |  |  |  |  |  |  |  |  |  |  |  |  |  |  |  |  |     |     |   |    |   |     |     |     |     |     |  |  |  |  |  |  |  |  |  |  |  |  |  |  |  |  |  |  |  |  |  |  |  |  |  |  |     |  |  |     |     |     |     |     |     |    |    |    |  |  |  |  |  |  |  |  |  |  |  |  |  |  |  |  |  |  |  |  |  |  |     |     |   |    |     |     |   |     |     |     |     |     |   |    |   |  |  |  |  |  |  |  |  |  |  |  |  |  |  |  |  |  |  |  |  |  |     |  |  |  |     |  |     |     |     |    |     |    |  |  |  |  |  |  |  |  |  |  |  |  |  |  |  |  |  |  |  |  |  |  |     |     |   |    |   |  |  |     |     |     |     |     |     |    |    |    |  |  |  |  |  |  |  |  |  |  |  |  |  |  |  |  |  |  |  |  |     |  |  |  |  |  |     |     |     |   |     |     |  |  |  |  |  |  |  |  |  |  |  |  |  |  |  |  |  |  |  |  |  |  |     |     |   |    |    |  |  |  |  |     |     |     |     |    |     |     |   |    |    |  |  |  |  |  |  |  |  |  |  |  |  |  |  |  |  |  |     |  |  |  |  |  |  |     |  |     |     |     |     |     |     |   |    |    |  |  |  |  |  |  |  |  |  |  |  |  |  |  |  |  |     |     |   |    |   |  |  |  |     |     |     |     |     |    |     |     |  |     |     |   |    |   |  |  |  |  |  |  |  |  |  |  |  |  |  |  |     |  |  |  |  |  |  |  |  |  |     |     |     |     |     |   |    |     |   |    |    |  |  |  |  |  |  |  |  |  |  |  |  |  |     |  |  |  |  |  |  |  |  |     |  |     |     |   |    |     |  |     |     |  |  |  |  |  |  |  |  |  |  |  |  |  |  |  |  |     |     |   |    |    |  |  |  |  |  |     |     |     |   |     |     |   |    |    |  |     |     |   |    |    |  |  |  |  |  |  |  |  |  |  |  |     |  |  |  |  |  |  |  |  |     |  |  |  |  |     |  |  |  |  |  |     |  |  |  |  |  |  |  |  |  |  |  |  |  |     |  |  |  |  |  |  |  |  |  |  |  |  |  |     |     |   |    |    |  |     |  |  |     |     |   |    |    |  |  |  |  |  |  |     |     |     |   |    |    |  |  |  |  |  |  |  |  |  |  |     |  |     |     |   |    |   |     |     |     |   |    |    |  |  |  |  |  |  |  |  |     |  |  |  |  |  |  |  |  |  |  |  |     |     |     |   |    |     |  |  |  |     |  |     |  |  |  |  |  |  |  |  |  |  |     |     |   |    |    |  |  |  |  |  |  |  |  |  |  |     |  |     |     |   |    |    |  |  |  |  |     |     |   |    |    |  |  |  |  |  |     |  |  |  |  |  |  |  |  |  |  |  |  |     |  |  |  |     |  |  |  |  |  |  |  |  |     |  |  |  |  |  |  |  |     |     |   |    |   |  |  |  |  |  |  |  |  |  |     |     |     |     |     |   |    |    |  |  |  |     |  |  |  |     |     |   |    |   |  |  |     |  |  |  |  |  |  |  |  |  |  |  |  |  |  |  |  |     |  |  |  |  |  |  |  |  |  |  |  |     |  |  |  |  |     |  |  |  |  |  |  |  |  |  |  |  |  |  |  |  |     |     |     |   |    |    |  |  |  |  |  |  |  |     |  |  |  |  |  |     |     |   |    |   |  |  |  |  |  |  |  |  |  |  |  |  |  |     |  |  |  |  |  |  |  |  |  |  |  |  |  |     |     |   |    |     |  |  |  |  |  |  |  |  |  |  |  |  |  |  |     |  |  |  |  |  |  |  |  |  |  |  |  |  |  |  |  |     |  |     |     |   |    |    |  |  |  |  |  |  |  |  |  |  |  |  |  |  |  |  |  |  |  |  |  |  |  |  |  |  |  |  |  |  |     |     |   |    |    |  |  |  |  |  |  |  |  |  |  |  |  |  |  |  |  |  |  |  |  |  |  |  |  |  |  |  |  |  |     |
|            | 427       |     |     |                           |        |            |       |        |          |          |        |          |            |    |            |       |        |          |          |        |          |        |    |            |       |        |       |        |                                |          |          |        |          |        |    |     | 505 |     |  |  |  |  |  |  |  |  |  |  |  |  |  |  |  |  |  |  |  |  |  |  |  |  |  |  |  |  |  |  |     |     |     | 153 | 444 | F   | 85 | 9  |    |  |  |  |  |  |  |  |  |  |  |  |  |  |  |  |  |  |  |  |  |  |  |  |  |  |  |  |     |     |     |     | 511 |     |     |    |    |  |  |  |  |  |  |  |  |  |  |  |  |  |  |  |  |  |  |  |  |  |  |  |  |  |     |     |     |     |    |     | 163 | 361 | F   | 47 | 23 |    |  |  |  |  |  |  |  |  |  |  |  |  |  |  |  |  |  |  |  |  |  |  |  |  |  |     |     |     |     |     |     |    |    | 424 |     |  |  |  |  |  |  |  |  |  |  |  |  |  |  |  |  |  |  |  |  |  |  |  |     |     |     |     |    |     |     |     | yes |     |     |     |    |    |    |  |  |  |  |  |  |  |  |  |  |  |  |  |  |  |  |  |  |  |  |  |  |     |     |     |     |     |    |     |     |     |     |    |     |     |  |  |  |  |  |  |  |  |  |  |  |  |  |  |  |  |  |  |  |  |  |     |     |     |    |     |     |     |     |     |    |    |     |     |     |   |    |    |  |  |  |  |  |  |  |  |  |  |  |  |  |  |  |  |  |  |  |     |     |     |     |     |     |     |     |    |     |     |     |     |    |    |     |  |  |  |  |  |  |  |  |  |  |  |  |  |  |  |  |  |  |     |     |     |    |     |     |     |     |     |    |    |    |  |  |  |     |     |   |    |   |  |  |  |  |  |  |  |  |  |  |  |  |  |  |  |  |     |     |     |     |     |     |     |     |    |  |  |  |  |     |     |     |     |    |     |    |  |  |  |  |  |  |  |  |  |  |  |  |  |  |     |     |   |    |     |     |     |     |     |     |    |    |    |     |     |     |   |    |     |     |     |    |   |  |  |  |  |  |  |  |  |  |  |  |  |     |     |     |     |     |     |     |     |     |     |     |   |    |   |  |  |     |  |     |     |     |   |     |    |  |  |  |  |  |  |  |  |  |  |  |     |     |     |    |     |     |     |     |     |     |     |     |    |  |  |  |  |     |     |     |     |     |     |     |    |   |  |  |  |  |  |  |  |  |  |  |     |     |     |     |     |     |     |     |     |     |     |     |    |    |    |  |  |  |  |  |     |     |     |   |     |    |  |  |  |  |  |  |  |  |     |     |   |     |     |     |     |     |     |     |     |     |     |  |  |  |  |  |  |     |  |     |     |     |     |     |     |    |    |  |  |  |  |  |  |  |     |     |     |     |     |     |     |     |     |     |     |     |    |    |    |  |  |  |  |  |  |  |  |     |     |     |   |     |   |  |  |  |  |  |     |  |  |     |     |     |     |     |     |     |     |    |     |  |  |  |  |  |  |  |  |  |  |     |     |     |     |     |     |     |    |   |  |  |  |  |     |     |     |     |     |     |     |     |     |     |     |     |    |    |    |  |  |  |  |  |  |  |  |  |  |  |  |     |     |   |     |   |  |  |  |  |  |     |     |     |     |     |     |     |     |    |     |  |  |  |  |  |  |  |  |  |  |  |  |  |  |     |     |     |     |    |     |  |  |  |  |  |     |     |     |     |     |     |     |     |     |     |    |    |    |  |  |  |  |  |  |  |  |  |  |  |     |     |     |     |     |     |    |    |   |  |     |     |     |     |     |     |     |     |     |    |     |  |  |  |  |  |  |  |  |  |  |  |  |  |  |  |  |  |  |     |     |   |     |     |  |  |  |     |     |     |     |     |     |     |     |     |    |    |    |  |  |  |  |  |  |  |  |  |  |  |  |  |  |  |     |     |     |     |     |   |    |     |     |     |     |     |     |     |     |    |     |  |  |  |  |  |  |  |  |  |  |  |  |  |  |  |  |  |  |  |     |     |     |     |    |    |     |     |     |     |     |     |     |     |     |     |    |    |   |  |  |  |  |  |  |  |  |  |  |  |  |  |  |  |  |  |  |     |     |   |     |     |     |    |     |     |     |     |     |     |     |  |  |  |  |  |  |  |  |  |  |  |  |  |  |  |  |  |  |  |  |  |  |  |     |     |     |     |     |     |     |     |     |     |     |     |    |    |   |  |  |  |  |  |  |  |  |  |  |  |  |  |  |  |  |  |  |  |  |     |     |     |     |     |     |   |     |     |     |     |     |  |  |  |  |  |  |  |  |  |  |  |  |  |  |  |  |  |  |  |  |  |  |  |  |  |  |     |     |     |    |     |     |     |     |     |    |    |    |  |  |  |  |  |  |  |  |  |  |  |  |  |  |  |  |  |  |  |  |  |  |     |     |   |    |   |     |     |     |     |     |  |  |  |  |  |  |  |  |  |  |  |  |  |  |  |  |  |  |  |  |  |  |  |  |  |  |     |  |  |     |     |     |     |     |     |    |    |    |  |  |  |  |  |  |  |  |  |  |  |  |  |  |  |  |  |  |  |  |  |  |     |     |   |    |     |     |   |     |     |     |     |     |   |    |   |  |  |  |  |  |  |  |  |  |  |  |  |  |  |  |  |  |  |  |  |  |     |  |  |  |     |  |     |     |     |    |     |    |  |  |  |  |  |  |  |  |  |  |  |  |  |  |  |  |  |  |  |  |  |  |     |     |   |    |   |  |  |     |     |     |     |     |     |    |    |    |  |  |  |  |  |  |  |  |  |  |  |  |  |  |  |  |  |  |  |  |     |  |  |  |  |  |     |     |     |   |     |     |  |  |  |  |  |  |  |  |  |  |  |  |  |  |  |  |  |  |  |  |  |  |     |     |   |    |    |  |  |  |  |     |     |     |     |    |     |     |   |    |    |  |  |  |  |  |  |  |  |  |  |  |  |  |  |  |  |  |     |  |  |  |  |  |  |     |  |     |     |     |     |     |     |   |    |    |  |  |  |  |  |  |  |  |  |  |  |  |  |  |  |  |     |     |   |    |   |  |  |  |     |     |     |     |     |    |     |     |  |     |     |   |    |   |  |  |  |  |  |  |  |  |  |  |  |  |  |  |     |  |  |  |  |  |  |  |  |  |     |     |     |     |     |   |    |     |   |    |    |  |  |  |  |  |  |  |  |  |  |  |  |  |     |  |  |  |  |  |  |  |  |     |  |     |     |   |    |     |  |     |     |  |  |  |  |  |  |  |  |  |  |  |  |  |  |  |  |     |     |   |    |    |  |  |  |  |  |     |     |     |   |     |     |   |    |    |  |     |     |   |    |    |  |  |  |  |  |  |  |  |  |  |  |     |  |  |  |  |  |  |  |  |     |  |  |  |  |     |  |  |  |  |  |     |  |  |  |  |  |  |  |  |  |  |  |  |  |     |  |  |  |  |  |  |  |  |  |  |  |  |  |     |     |   |    |    |  |     |  |  |     |     |   |    |    |  |  |  |  |  |  |     |     |     |   |    |    |  |  |  |  |  |  |  |  |  |  |     |  |     |     |   |    |   |     |     |     |   |    |    |  |  |  |  |  |  |  |  |     |  |  |  |  |  |  |  |  |  |  |  |     |     |     |   |    |     |  |  |  |     |  |     |  |  |  |  |  |  |  |  |  |  |     |     |   |    |    |  |  |  |  |  |  |  |  |  |  |     |  |     |     |   |    |    |  |  |  |  |     |     |   |    |    |  |  |  |  |  |     |  |  |  |  |  |  |  |  |  |  |  |  |     |  |  |  |     |  |  |  |  |  |  |  |  |     |  |  |  |  |  |  |  |     |     |   |    |   |  |  |  |  |  |  |  |  |  |     |     |     |     |     |   |    |    |  |  |  |     |  |  |  |     |     |   |    |   |  |  |     |  |  |  |  |  |  |  |  |  |  |  |  |  |  |  |  |     |  |  |  |  |  |  |  |  |  |  |  |     |  |  |  |  |     |  |  |  |  |  |  |  |  |  |  |  |  |  |  |  |     |     |     |   |    |    |  |  |  |  |  |  |  |     |  |  |  |  |  |     |     |   |    |   |  |  |  |  |  |  |  |  |  |  |  |  |  |     |  |  |  |  |  |  |  |  |  |  |  |  |  |     |     |   |    |     |  |  |  |  |  |  |  |  |  |  |  |  |  |  |     |  |  |  |  |  |  |  |  |  |  |  |  |  |  |  |  |     |  |     |     |   |    |    |  |  |  |  |  |  |  |  |  |  |  |  |  |  |  |  |  |  |  |  |  |  |  |  |  |  |  |  |  |  |     |     |   |    |    |  |  |  |  |  |  |  |  |  |  |  |  |  |  |  |  |  |  |  |  |  |  |  |  |  |  |  |  |  |     |
|            | 505       |     |     |                           |        |            |       |        |          |          |        |          |            |    |            |       |        |          |          |        |          |        |    |            |       |        |       |        |                                |          |          |        |          |        |    |     |     |     |  |  |  |  |  |  |  |  |  |  |  |  |  |  |  |  |  |  |  |  |  |  |  |  |  |  |  |  |  |  |     |     |     |     |     |     |    |    |    |  |  |  |  |  |  |  |  |  |  |  |  |  |  |  |  |  |  |  |  |  |  |  |  |  |  |  |     |     |     |     |     |     |     |    |    |  |  |  |  |  |  |  |  |  |  |  |  |  |  |  |  |  |  |  |  |  |  |  |  |  |     |     |     |     |    |     |     |     |     |    |    |    |  |  |  |  |  |  |  |  |  |  |  |  |  |  |  |  |  |  |  |  |  |  |  |  |  |     |     |     |     |     |     |    |    |     |     |  |  |  |  |  |  |  |  |  |  |  |  |  |  |  |  |  |  |  |  |  |  |  |     |     |     |     |    |     |     |     |     |     |     |     |    |    |    |  |  |  |  |  |  |  |  |  |  |  |  |  |  |  |  |  |  |  |  |  |  |     |     |     |     |     |    |     |     |     |     |    |     |     |  |  |  |  |  |  |  |  |  |  |  |  |  |  |  |  |  |  |  |  |  |     |     |     |    |     |     |     |     |     |    |    |     |     |     |   |    |    |  |  |  |  |  |  |  |  |  |  |  |  |  |  |  |  |  |  |  |     |     |     |     |     |     |     |     |    |     |     |     |     |    |    |     |  |  |  |  |  |  |  |  |  |  |  |  |  |  |  |  |  |  |     |     |     |    |     |     |     |     |     |    |    |    |  |  |  |     |     |   |    |   |  |  |  |  |  |  |  |  |  |  |  |  |  |  |  |  |     |     |     |     |     |     |     |     |    |  |  |  |  |     |     |     |     |    |     |    |  |  |  |  |  |  |  |  |  |  |  |  |  |  |     |     |   |    |     |     |     |     |     |     |    |    |    |     |     |     |   |    |     |     |     |    |   |  |  |  |  |  |  |  |  |  |  |  |  |     |     |     |     |     |     |     |     |     |     |     |   |    |   |  |  |     |  |     |     |     |   |     |    |  |  |  |  |  |  |  |  |  |  |  |     |     |     |    |     |     |     |     |     |     |     |     |    |  |  |  |  |     |     |     |     |     |     |     |    |   |  |  |  |  |  |  |  |  |  |  |     |     |     |     |     |     |     |     |     |     |     |     |    |    |    |  |  |  |  |  |     |     |     |   |     |    |  |  |  |  |  |  |  |  |     |     |   |     |     |     |     |     |     |     |     |     |     |  |  |  |  |  |  |     |  |     |     |     |     |     |     |    |    |  |  |  |  |  |  |  |     |     |     |     |     |     |     |     |     |     |     |     |    |    |    |  |  |  |  |  |  |  |  |     |     |     |   |     |   |  |  |  |  |  |     |  |  |     |     |     |     |     |     |     |     |    |     |  |  |  |  |  |  |  |  |  |  |     |     |     |     |     |     |     |    |   |  |  |  |  |     |     |     |     |     |     |     |     |     |     |     |     |    |    |    |  |  |  |  |  |  |  |  |  |  |  |  |     |     |   |     |   |  |  |  |  |  |     |     |     |     |     |     |     |     |    |     |  |  |  |  |  |  |  |  |  |  |  |  |  |  |     |     |     |     |    |     |  |  |  |  |  |     |     |     |     |     |     |     |     |     |     |    |    |    |  |  |  |  |  |  |  |  |  |  |  |     |     |     |     |     |     |    |    |   |  |     |     |     |     |     |     |     |     |     |    |     |  |  |  |  |  |  |  |  |  |  |  |  |  |  |  |  |  |  |     |     |   |     |     |  |  |  |     |     |     |     |     |     |     |     |     |    |    |    |  |  |  |  |  |  |  |  |  |  |  |  |  |  |  |     |     |     |     |     |   |    |     |     |     |     |     |     |     |     |    |     |  |  |  |  |  |  |  |  |  |  |  |  |  |  |  |  |  |  |  |     |     |     |     |    |    |     |     |     |     |     |     |     |     |     |     |    |    |   |  |  |  |  |  |  |  |  |  |  |  |  |  |  |  |  |  |  |     |     |   |     |     |     |    |     |     |     |     |     |     |     |  |  |  |  |  |  |  |  |  |  |  |  |  |  |  |  |  |  |  |  |  |  |  |     |     |     |     |     |     |     |     |     |     |     |     |    |    |   |  |  |  |  |  |  |  |  |  |  |  |  |  |  |  |  |  |  |  |  |     |     |     |     |     |     |   |     |     |     |     |     |  |  |  |  |  |  |  |  |  |  |  |  |  |  |  |  |  |  |  |  |  |  |  |  |  |  |     |     |     |    |     |     |     |     |     |    |    |    |  |  |  |  |  |  |  |  |  |  |  |  |  |  |  |  |  |  |  |  |  |  |     |     |   |    |   |     |     |     |     |     |  |  |  |  |  |  |  |  |  |  |  |  |  |  |  |  |  |  |  |  |  |  |  |  |  |  |     |  |  |     |     |     |     |     |     |    |    |    |  |  |  |  |  |  |  |  |  |  |  |  |  |  |  |  |  |  |  |  |  |  |     |     |   |    |     |     |   |     |     |     |     |     |   |    |   |  |  |  |  |  |  |  |  |  |  |  |  |  |  |  |  |  |  |  |  |  |     |  |  |  |     |  |     |     |     |    |     |    |  |  |  |  |  |  |  |  |  |  |  |  |  |  |  |  |  |  |  |  |  |  |     |     |   |    |   |  |  |     |     |     |     |     |     |    |    |    |  |  |  |  |  |  |  |  |  |  |  |  |  |  |  |  |  |  |  |  |     |  |  |  |  |  |     |     |     |   |     |     |  |  |  |  |  |  |  |  |  |  |  |  |  |  |  |  |  |  |  |  |  |  |     |     |   |    |    |  |  |  |  |     |     |     |     |    |     |     |   |    |    |  |  |  |  |  |  |  |  |  |  |  |  |  |  |  |  |  |     |  |  |  |  |  |  |     |  |     |     |     |     |     |     |   |    |    |  |  |  |  |  |  |  |  |  |  |  |  |  |  |  |  |     |     |   |    |   |  |  |  |     |     |     |     |     |    |     |     |  |     |     |   |    |   |  |  |  |  |  |  |  |  |  |  |  |  |  |  |     |  |  |  |  |  |  |  |  |  |     |     |     |     |     |   |    |     |   |    |    |  |  |  |  |  |  |  |  |  |  |  |  |  |     |  |  |  |  |  |  |  |  |     |  |     |     |   |    |     |  |     |     |  |  |  |  |  |  |  |  |  |  |  |  |  |  |  |  |     |     |   |    |    |  |  |  |  |  |     |     |     |   |     |     |   |    |    |  |     |     |   |    |    |  |  |  |  |  |  |  |  |  |  |  |     |  |  |  |  |  |  |  |  |     |  |  |  |  |     |  |  |  |  |  |     |  |  |  |  |  |  |  |  |  |  |  |  |  |     |  |  |  |  |  |  |  |  |  |  |  |  |  |     |     |   |    |    |  |     |  |  |     |     |   |    |    |  |  |  |  |  |  |     |     |     |   |    |    |  |  |  |  |  |  |  |  |  |  |     |  |     |     |   |    |   |     |     |     |   |    |    |  |  |  |  |  |  |  |  |     |  |  |  |  |  |  |  |  |  |  |  |     |     |     |   |    |     |  |  |  |     |  |     |  |  |  |  |  |  |  |  |  |  |     |     |   |    |    |  |  |  |  |  |  |  |  |  |  |     |  |     |     |   |    |    |  |  |  |  |     |     |   |    |    |  |  |  |  |  |     |  |  |  |  |  |  |  |  |  |  |  |  |     |  |  |  |     |  |  |  |  |  |  |  |  |     |  |  |  |  |  |  |  |     |     |   |    |   |  |  |  |  |  |  |  |  |  |     |     |     |     |     |   |    |    |  |  |  |     |  |  |  |     |     |   |    |   |  |  |     |  |  |  |  |  |  |  |  |  |  |  |  |  |  |  |  |     |  |  |  |  |  |  |  |  |  |  |  |     |  |  |  |  |     |  |  |  |  |  |  |  |  |  |  |  |  |  |  |  |     |     |     |   |    |    |  |  |  |  |  |  |  |     |  |  |  |  |  |     |     |   |    |   |  |  |  |  |  |  |  |  |  |  |  |  |  |     |  |  |  |  |  |  |  |  |  |  |  |  |  |     |     |   |    |     |  |  |  |  |  |  |  |  |  |  |  |  |  |  |     |  |  |  |  |  |  |  |  |  |  |  |  |  |  |  |  |     |  |     |     |   |    |    |  |  |  |  |  |  |  |  |  |  |  |  |  |  |  |  |  |  |  |  |  |  |  |  |  |  |  |  |  |  |     |     |   |    |    |  |  |  |  |  |  |  |  |  |  |  |  |  |  |  |  |  |  |  |  |  |  |  |  |  |  |  |  |  |     |
| 153        | 444       | F   | 85  | 9                         |        |            |       |        |          |          |        |          |            |    |            |       |        |          |          |        |          |        |    |            |       |        |       |        |                                |          |          |        |          |        |    | 511 |     |     |  |  |  |  |  |  |  |  |  |  |  |  |  |  |  |  |  |  |  |  |  |  |  |  |  |  |  |  |  |  |     | 163 | 361 | F   | 47  | 23  |    |    |    |  |  |  |  |  |  |  |  |  |  |  |  |  |  |  |  |  |  |  |  |  |  |  |  |  |  |  |     | 424 |     |     |     |     |     |    |    |  |  |  |  |  |  |  |  |  |  |  |  |  |  |  |  |  |  |  |  |  |  |  |  |  | yes |     |     |     |    |     |     |     |     |    |    |    |  |  |  |  |  |  |  |  |  |  |  |  |  |  |  |  |  |  |  |  |  |  |  |  |  |     |     |     |     |     |     |    |    |     |     |  |  |  |  |  |  |  |  |  |  |  |  |  |  |  |  |  |  |  |  |  |  |  |     |     |     |     |    |     |     |     |     |     |     |     |    |    |    |  |  |  |  |  |  |  |  |  |  |  |  |  |  |  |  |  |  |  |  |  |  |     |     |     |     |     |    |     |     |     |     |    |     |     |  |  |  |  |  |  |  |  |  |  |  |  |  |  |  |  |  |  |  |  |  |     |     |     |    |     |     |     |     |     |    |    |     |     |     |   |    |    |  |  |  |  |  |  |  |  |  |  |  |  |  |  |  |  |  |  |  |     |     |     |     |     |     |     |     |    |     |     |     |     |    |    |     |  |  |  |  |  |  |  |  |  |  |  |  |  |  |  |  |  |  |     |     |     |    |     |     |     |     |     |    |    |    |  |  |  |     |     |   |    |   |  |  |  |  |  |  |  |  |  |  |  |  |  |  |  |  |     |     |     |     |     |     |     |     |    |  |  |  |  |     |     |     |     |    |     |    |  |  |  |  |  |  |  |  |  |  |  |  |  |  |     |     |   |    |     |     |     |     |     |     |    |    |    |     |     |     |   |    |     |     |     |    |   |  |  |  |  |  |  |  |  |  |  |  |  |     |     |     |     |     |     |     |     |     |     |     |   |    |   |  |  |     |  |     |     |     |   |     |    |  |  |  |  |  |  |  |  |  |  |  |     |     |     |    |     |     |     |     |     |     |     |     |    |  |  |  |  |     |     |     |     |     |     |     |    |   |  |  |  |  |  |  |  |  |  |  |     |     |     |     |     |     |     |     |     |     |     |     |    |    |    |  |  |  |  |  |     |     |     |   |     |    |  |  |  |  |  |  |  |  |     |     |   |     |     |     |     |     |     |     |     |     |     |  |  |  |  |  |  |     |  |     |     |     |     |     |     |    |    |  |  |  |  |  |  |  |     |     |     |     |     |     |     |     |     |     |     |     |    |    |    |  |  |  |  |  |  |  |  |     |     |     |   |     |   |  |  |  |  |  |     |  |  |     |     |     |     |     |     |     |     |    |     |  |  |  |  |  |  |  |  |  |  |     |     |     |     |     |     |     |    |   |  |  |  |  |     |     |     |     |     |     |     |     |     |     |     |     |    |    |    |  |  |  |  |  |  |  |  |  |  |  |  |     |     |   |     |   |  |  |  |  |  |     |     |     |     |     |     |     |     |    |     |  |  |  |  |  |  |  |  |  |  |  |  |  |  |     |     |     |     |    |     |  |  |  |  |  |     |     |     |     |     |     |     |     |     |     |    |    |    |  |  |  |  |  |  |  |  |  |  |  |     |     |     |     |     |     |    |    |   |  |     |     |     |     |     |     |     |     |     |    |     |  |  |  |  |  |  |  |  |  |  |  |  |  |  |  |  |  |  |     |     |   |     |     |  |  |  |     |     |     |     |     |     |     |     |     |    |    |    |  |  |  |  |  |  |  |  |  |  |  |  |  |  |  |     |     |     |     |     |   |    |     |     |     |     |     |     |     |     |    |     |  |  |  |  |  |  |  |  |  |  |  |  |  |  |  |  |  |  |  |     |     |     |     |    |    |     |     |     |     |     |     |     |     |     |     |    |    |   |  |  |  |  |  |  |  |  |  |  |  |  |  |  |  |  |  |  |     |     |   |     |     |     |    |     |     |     |     |     |     |     |  |  |  |  |  |  |  |  |  |  |  |  |  |  |  |  |  |  |  |  |  |  |  |     |     |     |     |     |     |     |     |     |     |     |     |    |    |   |  |  |  |  |  |  |  |  |  |  |  |  |  |  |  |  |  |  |  |  |     |     |     |     |     |     |   |     |     |     |     |     |  |  |  |  |  |  |  |  |  |  |  |  |  |  |  |  |  |  |  |  |  |  |  |  |  |  |     |     |     |    |     |     |     |     |     |    |    |    |  |  |  |  |  |  |  |  |  |  |  |  |  |  |  |  |  |  |  |  |  |  |     |     |   |    |   |     |     |     |     |     |  |  |  |  |  |  |  |  |  |  |  |  |  |  |  |  |  |  |  |  |  |  |  |  |  |  |     |  |  |     |     |     |     |     |     |    |    |    |  |  |  |  |  |  |  |  |  |  |  |  |  |  |  |  |  |  |  |  |  |  |     |     |   |    |     |     |   |     |     |     |     |     |   |    |   |  |  |  |  |  |  |  |  |  |  |  |  |  |  |  |  |  |  |  |  |  |     |  |  |  |     |  |     |     |     |    |     |    |  |  |  |  |  |  |  |  |  |  |  |  |  |  |  |  |  |  |  |  |  |  |     |     |   |    |   |  |  |     |     |     |     |     |     |    |    |    |  |  |  |  |  |  |  |  |  |  |  |  |  |  |  |  |  |  |  |  |     |  |  |  |  |  |     |     |     |   |     |     |  |  |  |  |  |  |  |  |  |  |  |  |  |  |  |  |  |  |  |  |  |  |     |     |   |    |    |  |  |  |  |     |     |     |     |    |     |     |   |    |    |  |  |  |  |  |  |  |  |  |  |  |  |  |  |  |  |  |     |  |  |  |  |  |  |     |  |     |     |     |     |     |     |   |    |    |  |  |  |  |  |  |  |  |  |  |  |  |  |  |  |  |     |     |   |    |   |  |  |  |     |     |     |     |     |    |     |     |  |     |     |   |    |   |  |  |  |  |  |  |  |  |  |  |  |  |  |  |     |  |  |  |  |  |  |  |  |  |     |     |     |     |     |   |    |     |   |    |    |  |  |  |  |  |  |  |  |  |  |  |  |  |     |  |  |  |  |  |  |  |  |     |  |     |     |   |    |     |  |     |     |  |  |  |  |  |  |  |  |  |  |  |  |  |  |  |  |     |     |   |    |    |  |  |  |  |  |     |     |     |   |     |     |   |    |    |  |     |     |   |    |    |  |  |  |  |  |  |  |  |  |  |  |     |  |  |  |  |  |  |  |  |     |  |  |  |  |     |  |  |  |  |  |     |  |  |  |  |  |  |  |  |  |  |  |  |  |     |  |  |  |  |  |  |  |  |  |  |  |  |  |     |     |   |    |    |  |     |  |  |     |     |   |    |    |  |  |  |  |  |  |     |     |     |   |    |    |  |  |  |  |  |  |  |  |  |  |     |  |     |     |   |    |   |     |     |     |   |    |    |  |  |  |  |  |  |  |  |     |  |  |  |  |  |  |  |  |  |  |  |     |     |     |   |    |     |  |  |  |     |  |     |  |  |  |  |  |  |  |  |  |  |     |     |   |    |    |  |  |  |  |  |  |  |  |  |  |     |  |     |     |   |    |    |  |  |  |  |     |     |   |    |    |  |  |  |  |  |     |  |  |  |  |  |  |  |  |  |  |  |  |     |  |  |  |     |  |  |  |  |  |  |  |  |     |  |  |  |  |  |  |  |     |     |   |    |   |  |  |  |  |  |  |  |  |  |     |     |     |     |     |   |    |    |  |  |  |     |  |  |  |     |     |   |    |   |  |  |     |  |  |  |  |  |  |  |  |  |  |  |  |  |  |  |  |     |  |  |  |  |  |  |  |  |  |  |  |     |  |  |  |  |     |  |  |  |  |  |  |  |  |  |  |  |  |  |  |  |     |     |     |   |    |    |  |  |  |  |  |  |  |     |  |  |  |  |  |     |     |   |    |   |  |  |  |  |  |  |  |  |  |  |  |  |  |     |  |  |  |  |  |  |  |  |  |  |  |  |  |     |     |   |    |     |  |  |  |  |  |  |  |  |  |  |  |  |  |  |     |  |  |  |  |  |  |  |  |  |  |  |  |  |  |  |  |     |  |     |     |   |    |    |  |  |  |  |  |  |  |  |  |  |  |  |  |  |  |  |  |  |  |  |  |  |  |  |  |  |  |  |  |  |     |     |   |    |    |  |  |  |  |  |  |  |  |  |  |  |  |  |  |  |  |  |  |  |  |  |  |  |  |  |  |  |  |  |     |
|            | 511       |     |     |                           |        |            |       |        |          |          |        |          |            |    |            |       |        |          |          |        |          |        |    |            |       |        |       |        |                                |          |          |        |          |        |    |     |     |     |  |  |  |  |  |  |  |  |  |  |  |  |  |  |  |  |  |  |  |  |  |  |  |  |  |  |  |  |  |  |     |     |     |     |     |     |    |    |    |  |  |  |  |  |  |  |  |  |  |  |  |  |  |  |  |  |  |  |  |  |  |  |  |  |  |  |     |     |     |     |     |     |     |    |    |  |  |  |  |  |  |  |  |  |  |  |  |  |  |  |  |  |  |  |  |  |  |  |  |  |     |     |     |     |    |     |     |     |     |    |    |    |  |  |  |  |  |  |  |  |  |  |  |  |  |  |  |  |  |  |  |  |  |  |  |  |  |     |     |     |     |     |     |    |    |     |     |  |  |  |  |  |  |  |  |  |  |  |  |  |  |  |  |  |  |  |  |  |  |  |     |     |     |     |    |     |     |     |     |     |     |     |    |    |    |  |  |  |  |  |  |  |  |  |  |  |  |  |  |  |  |  |  |  |  |  |  |     |     |     |     |     |    |     |     |     |     |    |     |     |  |  |  |  |  |  |  |  |  |  |  |  |  |  |  |  |  |  |  |  |  |     |     |     |    |     |     |     |     |     |    |    |     |     |     |   |    |    |  |  |  |  |  |  |  |  |  |  |  |  |  |  |  |  |  |  |  |     |     |     |     |     |     |     |     |    |     |     |     |     |    |    |     |  |  |  |  |  |  |  |  |  |  |  |  |  |  |  |  |  |  |     |     |     |    |     |     |     |     |     |    |    |    |  |  |  |     |     |   |    |   |  |  |  |  |  |  |  |  |  |  |  |  |  |  |  |  |     |     |     |     |     |     |     |     |    |  |  |  |  |     |     |     |     |    |     |    |  |  |  |  |  |  |  |  |  |  |  |  |  |  |     |     |   |    |     |     |     |     |     |     |    |    |    |     |     |     |   |    |     |     |     |    |   |  |  |  |  |  |  |  |  |  |  |  |  |     |     |     |     |     |     |     |     |     |     |     |   |    |   |  |  |     |  |     |     |     |   |     |    |  |  |  |  |  |  |  |  |  |  |  |     |     |     |    |     |     |     |     |     |     |     |     |    |  |  |  |  |     |     |     |     |     |     |     |    |   |  |  |  |  |  |  |  |  |  |  |     |     |     |     |     |     |     |     |     |     |     |     |    |    |    |  |  |  |  |  |     |     |     |   |     |    |  |  |  |  |  |  |  |  |     |     |   |     |     |     |     |     |     |     |     |     |     |  |  |  |  |  |  |     |  |     |     |     |     |     |     |    |    |  |  |  |  |  |  |  |     |     |     |     |     |     |     |     |     |     |     |     |    |    |    |  |  |  |  |  |  |  |  |     |     |     |   |     |   |  |  |  |  |  |     |  |  |     |     |     |     |     |     |     |     |    |     |  |  |  |  |  |  |  |  |  |  |     |     |     |     |     |     |     |    |   |  |  |  |  |     |     |     |     |     |     |     |     |     |     |     |     |    |    |    |  |  |  |  |  |  |  |  |  |  |  |  |     |     |   |     |   |  |  |  |  |  |     |     |     |     |     |     |     |     |    |     |  |  |  |  |  |  |  |  |  |  |  |  |  |  |     |     |     |     |    |     |  |  |  |  |  |     |     |     |     |     |     |     |     |     |     |    |    |    |  |  |  |  |  |  |  |  |  |  |  |     |     |     |     |     |     |    |    |   |  |     |     |     |     |     |     |     |     |     |    |     |  |  |  |  |  |  |  |  |  |  |  |  |  |  |  |  |  |  |     |     |   |     |     |  |  |  |     |     |     |     |     |     |     |     |     |    |    |    |  |  |  |  |  |  |  |  |  |  |  |  |  |  |  |     |     |     |     |     |   |    |     |     |     |     |     |     |     |     |    |     |  |  |  |  |  |  |  |  |  |  |  |  |  |  |  |  |  |  |  |     |     |     |     |    |    |     |     |     |     |     |     |     |     |     |     |    |    |   |  |  |  |  |  |  |  |  |  |  |  |  |  |  |  |  |  |  |     |     |   |     |     |     |    |     |     |     |     |     |     |     |  |  |  |  |  |  |  |  |  |  |  |  |  |  |  |  |  |  |  |  |  |  |  |     |     |     |     |     |     |     |     |     |     |     |     |    |    |   |  |  |  |  |  |  |  |  |  |  |  |  |  |  |  |  |  |  |  |  |     |     |     |     |     |     |   |     |     |     |     |     |  |  |  |  |  |  |  |  |  |  |  |  |  |  |  |  |  |  |  |  |  |  |  |  |  |  |     |     |     |    |     |     |     |     |     |    |    |    |  |  |  |  |  |  |  |  |  |  |  |  |  |  |  |  |  |  |  |  |  |  |     |     |   |    |   |     |     |     |     |     |  |  |  |  |  |  |  |  |  |  |  |  |  |  |  |  |  |  |  |  |  |  |  |  |  |  |     |  |  |     |     |     |     |     |     |    |    |    |  |  |  |  |  |  |  |  |  |  |  |  |  |  |  |  |  |  |  |  |  |  |     |     |   |    |     |     |   |     |     |     |     |     |   |    |   |  |  |  |  |  |  |  |  |  |  |  |  |  |  |  |  |  |  |  |  |  |     |  |  |  |     |  |     |     |     |    |     |    |  |  |  |  |  |  |  |  |  |  |  |  |  |  |  |  |  |  |  |  |  |  |     |     |   |    |   |  |  |     |     |     |     |     |     |    |    |    |  |  |  |  |  |  |  |  |  |  |  |  |  |  |  |  |  |  |  |  |     |  |  |  |  |  |     |     |     |   |     |     |  |  |  |  |  |  |  |  |  |  |  |  |  |  |  |  |  |  |  |  |  |  |     |     |   |    |    |  |  |  |  |     |     |     |     |    |     |     |   |    |    |  |  |  |  |  |  |  |  |  |  |  |  |  |  |  |  |  |     |  |  |  |  |  |  |     |  |     |     |     |     |     |     |   |    |    |  |  |  |  |  |  |  |  |  |  |  |  |  |  |  |  |     |     |   |    |   |  |  |  |     |     |     |     |     |    |     |     |  |     |     |   |    |   |  |  |  |  |  |  |  |  |  |  |  |  |  |  |     |  |  |  |  |  |  |  |  |  |     |     |     |     |     |   |    |     |   |    |    |  |  |  |  |  |  |  |  |  |  |  |  |  |     |  |  |  |  |  |  |  |  |     |  |     |     |   |    |     |  |     |     |  |  |  |  |  |  |  |  |  |  |  |  |  |  |  |  |     |     |   |    |    |  |  |  |  |  |     |     |     |   |     |     |   |    |    |  |     |     |   |    |    |  |  |  |  |  |  |  |  |  |  |  |     |  |  |  |  |  |  |  |  |     |  |  |  |  |     |  |  |  |  |  |     |  |  |  |  |  |  |  |  |  |  |  |  |  |     |  |  |  |  |  |  |  |  |  |  |  |  |  |     |     |   |    |    |  |     |  |  |     |     |   |    |    |  |  |  |  |  |  |     |     |     |   |    |    |  |  |  |  |  |  |  |  |  |  |     |  |     |     |   |    |   |     |     |     |   |    |    |  |  |  |  |  |  |  |  |     |  |  |  |  |  |  |  |  |  |  |  |     |     |     |   |    |     |  |  |  |     |  |     |  |  |  |  |  |  |  |  |  |  |     |     |   |    |    |  |  |  |  |  |  |  |  |  |  |     |  |     |     |   |    |    |  |  |  |  |     |     |   |    |    |  |  |  |  |  |     |  |  |  |  |  |  |  |  |  |  |  |  |     |  |  |  |     |  |  |  |  |  |  |  |  |     |  |  |  |  |  |  |  |     |     |   |    |   |  |  |  |  |  |  |  |  |  |     |     |     |     |     |   |    |    |  |  |  |     |  |  |  |     |     |   |    |   |  |  |     |  |  |  |  |  |  |  |  |  |  |  |  |  |  |  |  |     |  |  |  |  |  |  |  |  |  |  |  |     |  |  |  |  |     |  |  |  |  |  |  |  |  |  |  |  |  |  |  |  |     |     |     |   |    |    |  |  |  |  |  |  |  |     |  |  |  |  |  |     |     |   |    |   |  |  |  |  |  |  |  |  |  |  |  |  |  |     |  |  |  |  |  |  |  |  |  |  |  |  |  |     |     |   |    |     |  |  |  |  |  |  |  |  |  |  |  |  |  |  |     |  |  |  |  |  |  |  |  |  |  |  |  |  |  |  |  |     |  |     |     |   |    |    |  |  |  |  |  |  |  |  |  |  |  |  |  |  |  |  |  |  |  |  |  |  |  |  |  |  |  |  |  |  |     |     |   |    |    |  |  |  |  |  |  |  |  |  |  |  |  |  |  |  |  |  |  |  |  |  |  |  |  |  |  |  |  |  |     |
| 163        | 361       | F   | 47  | 23                        |        |            |       |        |          |          |        |          |            |    |            |       |        |          |          |        |          |        |    |            |       |        |       |        |                                |          |          |        |          |        |    | 424 |     |     |  |  |  |  |  |  |  |  |  |  |  |  |  |  |  |  |  |  |  |  |  |  |  |  |  |  |  |  |  |  | yes |     |     |     |     |     |    |    |    |  |  |  |  |  |  |  |  |  |  |  |  |  |  |  |  |  |  |  |  |  |  |  |  |  |  |  |     |     |     |     |     |     |     |    |    |  |  |  |  |  |  |  |  |  |  |  |  |  |  |  |  |  |  |  |  |  |  |  |  |  |     |     |     |     |    |     |     |     |     |    |    |    |  |  |  |  |  |  |  |  |  |  |  |  |  |  |  |  |  |  |  |  |  |  |  |  |  |     |     |     |     |     |     |    |    |     |     |  |  |  |  |  |  |  |  |  |  |  |  |  |  |  |  |  |  |  |  |  |  |  |     |     |     |     |    |     |     |     |     |     |     |     |    |    |    |  |  |  |  |  |  |  |  |  |  |  |  |  |  |  |  |  |  |  |  |  |  |     |     |     |     |     |    |     |     |     |     |    |     |     |  |  |  |  |  |  |  |  |  |  |  |  |  |  |  |  |  |  |  |  |  |     |     |     |    |     |     |     |     |     |    |    |     |     |     |   |    |    |  |  |  |  |  |  |  |  |  |  |  |  |  |  |  |  |  |  |  |     |     |     |     |     |     |     |     |    |     |     |     |     |    |    |     |  |  |  |  |  |  |  |  |  |  |  |  |  |  |  |  |  |  |     |     |     |    |     |     |     |     |     |    |    |    |  |  |  |     |     |   |    |   |  |  |  |  |  |  |  |  |  |  |  |  |  |  |  |  |     |     |     |     |     |     |     |     |    |  |  |  |  |     |     |     |     |    |     |    |  |  |  |  |  |  |  |  |  |  |  |  |  |  |     |     |   |    |     |     |     |     |     |     |    |    |    |     |     |     |   |    |     |     |     |    |   |  |  |  |  |  |  |  |  |  |  |  |  |     |     |     |     |     |     |     |     |     |     |     |   |    |   |  |  |     |  |     |     |     |   |     |    |  |  |  |  |  |  |  |  |  |  |  |     |     |     |    |     |     |     |     |     |     |     |     |    |  |  |  |  |     |     |     |     |     |     |     |    |   |  |  |  |  |  |  |  |  |  |  |     |     |     |     |     |     |     |     |     |     |     |     |    |    |    |  |  |  |  |  |     |     |     |   |     |    |  |  |  |  |  |  |  |  |     |     |   |     |     |     |     |     |     |     |     |     |     |  |  |  |  |  |  |     |  |     |     |     |     |     |     |    |    |  |  |  |  |  |  |  |     |     |     |     |     |     |     |     |     |     |     |     |    |    |    |  |  |  |  |  |  |  |  |     |     |     |   |     |   |  |  |  |  |  |     |  |  |     |     |     |     |     |     |     |     |    |     |  |  |  |  |  |  |  |  |  |  |     |     |     |     |     |     |     |    |   |  |  |  |  |     |     |     |     |     |     |     |     |     |     |     |     |    |    |    |  |  |  |  |  |  |  |  |  |  |  |  |     |     |   |     |   |  |  |  |  |  |     |     |     |     |     |     |     |     |    |     |  |  |  |  |  |  |  |  |  |  |  |  |  |  |     |     |     |     |    |     |  |  |  |  |  |     |     |     |     |     |     |     |     |     |     |    |    |    |  |  |  |  |  |  |  |  |  |  |  |     |     |     |     |     |     |    |    |   |  |     |     |     |     |     |     |     |     |     |    |     |  |  |  |  |  |  |  |  |  |  |  |  |  |  |  |  |  |  |     |     |   |     |     |  |  |  |     |     |     |     |     |     |     |     |     |    |    |    |  |  |  |  |  |  |  |  |  |  |  |  |  |  |  |     |     |     |     |     |   |    |     |     |     |     |     |     |     |     |    |     |  |  |  |  |  |  |  |  |  |  |  |  |  |  |  |  |  |  |  |     |     |     |     |    |    |     |     |     |     |     |     |     |     |     |     |    |    |   |  |  |  |  |  |  |  |  |  |  |  |  |  |  |  |  |  |  |     |     |   |     |     |     |    |     |     |     |     |     |     |     |  |  |  |  |  |  |  |  |  |  |  |  |  |  |  |  |  |  |  |  |  |  |  |     |     |     |     |     |     |     |     |     |     |     |     |    |    |   |  |  |  |  |  |  |  |  |  |  |  |  |  |  |  |  |  |  |  |  |     |     |     |     |     |     |   |     |     |     |     |     |  |  |  |  |  |  |  |  |  |  |  |  |  |  |  |  |  |  |  |  |  |  |  |  |  |  |     |     |     |    |     |     |     |     |     |    |    |    |  |  |  |  |  |  |  |  |  |  |  |  |  |  |  |  |  |  |  |  |  |  |     |     |   |    |   |     |     |     |     |     |  |  |  |  |  |  |  |  |  |  |  |  |  |  |  |  |  |  |  |  |  |  |  |  |  |  |     |  |  |     |     |     |     |     |     |    |    |    |  |  |  |  |  |  |  |  |  |  |  |  |  |  |  |  |  |  |  |  |  |  |     |     |   |    |     |     |   |     |     |     |     |     |   |    |   |  |  |  |  |  |  |  |  |  |  |  |  |  |  |  |  |  |  |  |  |  |     |  |  |  |     |  |     |     |     |    |     |    |  |  |  |  |  |  |  |  |  |  |  |  |  |  |  |  |  |  |  |  |  |  |     |     |   |    |   |  |  |     |     |     |     |     |     |    |    |    |  |  |  |  |  |  |  |  |  |  |  |  |  |  |  |  |  |  |  |  |     |  |  |  |  |  |     |     |     |   |     |     |  |  |  |  |  |  |  |  |  |  |  |  |  |  |  |  |  |  |  |  |  |  |     |     |   |    |    |  |  |  |  |     |     |     |     |    |     |     |   |    |    |  |  |  |  |  |  |  |  |  |  |  |  |  |  |  |  |  |     |  |  |  |  |  |  |     |  |     |     |     |     |     |     |   |    |    |  |  |  |  |  |  |  |  |  |  |  |  |  |  |  |  |     |     |   |    |   |  |  |  |     |     |     |     |     |    |     |     |  |     |     |   |    |   |  |  |  |  |  |  |  |  |  |  |  |  |  |  |     |  |  |  |  |  |  |  |  |  |     |     |     |     |     |   |    |     |   |    |    |  |  |  |  |  |  |  |  |  |  |  |  |  |     |  |  |  |  |  |  |  |  |     |  |     |     |   |    |     |  |     |     |  |  |  |  |  |  |  |  |  |  |  |  |  |  |  |  |     |     |   |    |    |  |  |  |  |  |     |     |     |   |     |     |   |    |    |  |     |     |   |    |    |  |  |  |  |  |  |  |  |  |  |  |     |  |  |  |  |  |  |  |  |     |  |  |  |  |     |  |  |  |  |  |     |  |  |  |  |  |  |  |  |  |  |  |  |  |     |  |  |  |  |  |  |  |  |  |  |  |  |  |     |     |   |    |    |  |     |  |  |     |     |   |    |    |  |  |  |  |  |  |     |     |     |   |    |    |  |  |  |  |  |  |  |  |  |  |     |  |     |     |   |    |   |     |     |     |   |    |    |  |  |  |  |  |  |  |  |     |  |  |  |  |  |  |  |  |  |  |  |     |     |     |   |    |     |  |  |  |     |  |     |  |  |  |  |  |  |  |  |  |  |     |     |   |    |    |  |  |  |  |  |  |  |  |  |  |     |  |     |     |   |    |    |  |  |  |  |     |     |   |    |    |  |  |  |  |  |     |  |  |  |  |  |  |  |  |  |  |  |  |     |  |  |  |     |  |  |  |  |  |  |  |  |     |  |  |  |  |  |  |  |     |     |   |    |   |  |  |  |  |  |  |  |  |  |     |     |     |     |     |   |    |    |  |  |  |     |  |  |  |     |     |   |    |   |  |  |     |  |  |  |  |  |  |  |  |  |  |  |  |  |  |  |  |     |  |  |  |  |  |  |  |  |  |  |  |     |  |  |  |  |     |  |  |  |  |  |  |  |  |  |  |  |  |  |  |  |     |     |     |   |    |    |  |  |  |  |  |  |  |     |  |  |  |  |  |     |     |   |    |   |  |  |  |  |  |  |  |  |  |  |  |  |  |     |  |  |  |  |  |  |  |  |  |  |  |  |  |     |     |   |    |     |  |  |  |  |  |  |  |  |  |  |  |  |  |  |     |  |  |  |  |  |  |  |  |  |  |  |  |  |  |  |  |     |  |     |     |   |    |    |  |  |  |  |  |  |  |  |  |  |  |  |  |  |  |  |  |  |  |  |  |  |  |  |  |  |  |  |  |  |     |     |   |    |    |  |  |  |  |  |  |  |  |  |  |  |  |  |  |  |  |  |  |  |  |  |  |  |  |  |  |  |  |  |     |
|            | 424       |     |     |                           |        |            |       |        |          |          |        |          |            |    |            |       |        |          |          |        |          |        |    |            |       |        |       |        |                                |          |          |        |          |        |    | yes |     |     |  |  |  |  |  |  |  |  |  |  |  |  |  |  |  |  |  |  |  |  |  |  |  |  |  |  |  |  |  |  |     |     |     |     |     |     |    |    |    |  |  |  |  |  |  |  |  |  |  |  |  |  |  |  |  |  |  |  |  |  |  |  |  |  |  |  |     |     |     |     |     |     |     |    |    |  |  |  |  |  |  |  |  |  |  |  |  |  |  |  |  |  |  |  |  |  |  |  |  |  |     |     |     |     |    |     |     |     |     |    |    |    |  |  |  |  |  |  |  |  |  |  |  |  |  |  |  |  |  |  |  |  |  |  |  |  |  |     |     |     |     |     |     |    |    |     |     |  |  |  |  |  |  |  |  |  |  |  |  |  |  |  |  |  |  |  |  |  |  |  |     |     |     |     |    |     |     |     |     |     |     |     |    |    |    |  |  |  |  |  |  |  |  |  |  |  |  |  |  |  |  |  |  |  |  |  |  |     |     |     |     |     |    |     |     |     |     |    |     |     |  |  |  |  |  |  |  |  |  |  |  |  |  |  |  |  |  |  |  |  |  |     |     |     |    |     |     |     |     |     |    |    |     |     |     |   |    |    |  |  |  |  |  |  |  |  |  |  |  |  |  |  |  |  |  |  |  |     |     |     |     |     |     |     |     |    |     |     |     |     |    |    |     |  |  |  |  |  |  |  |  |  |  |  |  |  |  |  |  |  |  |     |     |     |    |     |     |     |     |     |    |    |    |  |  |  |     |     |   |    |   |  |  |  |  |  |  |  |  |  |  |  |  |  |  |  |  |     |     |     |     |     |     |     |     |    |  |  |  |  |     |     |     |     |    |     |    |  |  |  |  |  |  |  |  |  |  |  |  |  |  |     |     |   |    |     |     |     |     |     |     |    |    |    |     |     |     |   |    |     |     |     |    |   |  |  |  |  |  |  |  |  |  |  |  |  |     |     |     |     |     |     |     |     |     |     |     |   |    |   |  |  |     |  |     |     |     |   |     |    |  |  |  |  |  |  |  |  |  |  |  |     |     |     |    |     |     |     |     |     |     |     |     |    |  |  |  |  |     |     |     |     |     |     |     |    |   |  |  |  |  |  |  |  |  |  |  |     |     |     |     |     |     |     |     |     |     |     |     |    |    |    |  |  |  |  |  |     |     |     |   |     |    |  |  |  |  |  |  |  |  |     |     |   |     |     |     |     |     |     |     |     |     |     |  |  |  |  |  |  |     |  |     |     |     |     |     |     |    |    |  |  |  |  |  |  |  |     |     |     |     |     |     |     |     |     |     |     |     |    |    |    |  |  |  |  |  |  |  |  |     |     |     |   |     |   |  |  |  |  |  |     |  |  |     |     |     |     |     |     |     |     |    |     |  |  |  |  |  |  |  |  |  |  |     |     |     |     |     |     |     |    |   |  |  |  |  |     |     |     |     |     |     |     |     |     |     |     |     |    |    |    |  |  |  |  |  |  |  |  |  |  |  |  |     |     |   |     |   |  |  |  |  |  |     |     |     |     |     |     |     |     |    |     |  |  |  |  |  |  |  |  |  |  |  |  |  |  |     |     |     |     |    |     |  |  |  |  |  |     |     |     |     |     |     |     |     |     |     |    |    |    |  |  |  |  |  |  |  |  |  |  |  |     |     |     |     |     |     |    |    |   |  |     |     |     |     |     |     |     |     |     |    |     |  |  |  |  |  |  |  |  |  |  |  |  |  |  |  |  |  |  |     |     |   |     |     |  |  |  |     |     |     |     |     |     |     |     |     |    |    |    |  |  |  |  |  |  |  |  |  |  |  |  |  |  |  |     |     |     |     |     |   |    |     |     |     |     |     |     |     |     |    |     |  |  |  |  |  |  |  |  |  |  |  |  |  |  |  |  |  |  |  |     |     |     |     |    |    |     |     |     |     |     |     |     |     |     |     |    |    |   |  |  |  |  |  |  |  |  |  |  |  |  |  |  |  |  |  |  |     |     |   |     |     |     |    |     |     |     |     |     |     |     |  |  |  |  |  |  |  |  |  |  |  |  |  |  |  |  |  |  |  |  |  |  |  |     |     |     |     |     |     |     |     |     |     |     |     |    |    |   |  |  |  |  |  |  |  |  |  |  |  |  |  |  |  |  |  |  |  |  |     |     |     |     |     |     |   |     |     |     |     |     |  |  |  |  |  |  |  |  |  |  |  |  |  |  |  |  |  |  |  |  |  |  |  |  |  |  |     |     |     |    |     |     |     |     |     |    |    |    |  |  |  |  |  |  |  |  |  |  |  |  |  |  |  |  |  |  |  |  |  |  |     |     |   |    |   |     |     |     |     |     |  |  |  |  |  |  |  |  |  |  |  |  |  |  |  |  |  |  |  |  |  |  |  |  |  |  |     |  |  |     |     |     |     |     |     |    |    |    |  |  |  |  |  |  |  |  |  |  |  |  |  |  |  |  |  |  |  |  |  |  |     |     |   |    |     |     |   |     |     |     |     |     |   |    |   |  |  |  |  |  |  |  |  |  |  |  |  |  |  |  |  |  |  |  |  |  |     |  |  |  |     |  |     |     |     |    |     |    |  |  |  |  |  |  |  |  |  |  |  |  |  |  |  |  |  |  |  |  |  |  |     |     |   |    |   |  |  |     |     |     |     |     |     |    |    |    |  |  |  |  |  |  |  |  |  |  |  |  |  |  |  |  |  |  |  |  |     |  |  |  |  |  |     |     |     |   |     |     |  |  |  |  |  |  |  |  |  |  |  |  |  |  |  |  |  |  |  |  |  |  |     |     |   |    |    |  |  |  |  |     |     |     |     |    |     |     |   |    |    |  |  |  |  |  |  |  |  |  |  |  |  |  |  |  |  |  |     |  |  |  |  |  |  |     |  |     |     |     |     |     |     |   |    |    |  |  |  |  |  |  |  |  |  |  |  |  |  |  |  |  |     |     |   |    |   |  |  |  |     |     |     |     |     |    |     |     |  |     |     |   |    |   |  |  |  |  |  |  |  |  |  |  |  |  |  |  |     |  |  |  |  |  |  |  |  |  |     |     |     |     |     |   |    |     |   |    |    |  |  |  |  |  |  |  |  |  |  |  |  |  |     |  |  |  |  |  |  |  |  |     |  |     |     |   |    |     |  |     |     |  |  |  |  |  |  |  |  |  |  |  |  |  |  |  |  |     |     |   |    |    |  |  |  |  |  |     |     |     |   |     |     |   |    |    |  |     |     |   |    |    |  |  |  |  |  |  |  |  |  |  |  |     |  |  |  |  |  |  |  |  |     |  |  |  |  |     |  |  |  |  |  |     |  |  |  |  |  |  |  |  |  |  |  |  |  |     |  |  |  |  |  |  |  |  |  |  |  |  |  |     |     |   |    |    |  |     |  |  |     |     |   |    |    |  |  |  |  |  |  |     |     |     |   |    |    |  |  |  |  |  |  |  |  |  |  |     |  |     |     |   |    |   |     |     |     |   |    |    |  |  |  |  |  |  |  |  |     |  |  |  |  |  |  |  |  |  |  |  |     |     |     |   |    |     |  |  |  |     |  |     |  |  |  |  |  |  |  |  |  |  |     |     |   |    |    |  |  |  |  |  |  |  |  |  |  |     |  |     |     |   |    |    |  |  |  |  |     |     |   |    |    |  |  |  |  |  |     |  |  |  |  |  |  |  |  |  |  |  |  |     |  |  |  |     |  |  |  |  |  |  |  |  |     |  |  |  |  |  |  |  |     |     |   |    |   |  |  |  |  |  |  |  |  |  |     |     |     |     |     |   |    |    |  |  |  |     |  |  |  |     |     |   |    |   |  |  |     |  |  |  |  |  |  |  |  |  |  |  |  |  |  |  |  |     |  |  |  |  |  |  |  |  |  |  |  |     |  |  |  |  |     |  |  |  |  |  |  |  |  |  |  |  |  |  |  |  |     |     |     |   |    |    |  |  |  |  |  |  |  |     |  |  |  |  |  |     |     |   |    |   |  |  |  |  |  |  |  |  |  |  |  |  |  |     |  |  |  |  |  |  |  |  |  |  |  |  |  |     |     |   |    |     |  |  |  |  |  |  |  |  |  |  |  |  |  |  |     |  |  |  |  |  |  |  |  |  |  |  |  |  |  |  |  |     |  |     |     |   |    |    |  |  |  |  |  |  |  |  |  |  |  |  |  |  |  |  |  |  |  |  |  |  |  |  |  |  |  |  |  |  |     |     |   |    |    |  |  |  |  |  |  |  |  |  |  |  |  |  |  |  |  |  |  |  |  |  |  |  |  |  |  |  |  |  |     |

|  |            |
|--|------------|
|  | Positive   |
|  | Negative   |
|  | Not tested |

F: female; Ig: immunoglobulin; M: male; NPV: negative predictive value; PPV: positive predictive value; sens: sensitivity.

**Supplementary Table S3.** Summary of tests' results from healthy controls and HIV-infected controls (samples collected at pre-COVID-19 pandemic), with data organized by group of controls (HIV or healthy), followed by age and sex.

| Patient ID | Sex | Age | IgG    |            |       |        |          |           |        |          | IgA or IgM |    |            |       |        |          |           |        | Total Ig |        |    |            |       |        |        |          |  |           |        |          |        |    |
|------------|-----|-----|--------|------------|-------|--------|----------|-----------|--------|----------|------------|----|------------|-------|--------|----------|-----------|--------|----------|--------|----|------------|-------|--------|--------|----------|--|-----------|--------|----------|--------|----|
|            |     |     | Abbott | Euroimmune | Snibe | Cellex | Innovita | Leccurate | Liming | Medomics | Render     | SD | Euroimmune | Snibe | Cellex | Innovita | Leccurate | Liming | Medomics | Render | SD | Euroimmune | Snibe | Cellex | Getein | Innovita |  | Leccurate | Liming | Medomics | Render | SD |
|            |     |     |        |            |       |        |          |           |        |          |            |    |            |       |        |          |           |        |          |        |    |            |       |        |        |          |  |           |        |          |        |    |
| HIV 085    | M   | 33  |        |            |       |        |          |           |        |          |            |    |            |       |        |          |           |        |          |        |    |            |       |        |        |          |  |           |        |          |        |    |
| HIV 073    | F   | 46  |        |            |       |        |          |           |        |          |            |    |            |       |        |          |           |        |          |        |    |            |       |        |        |          |  |           |        |          |        |    |
| HIV 027    | M   | 49  |        |            |       |        |          |           |        |          |            |    |            |       |        |          |           |        |          |        |    |            |       |        |        |          |  |           |        |          |        |    |
| HIV 044    | F   | 51  |        |            |       |        |          |           |        |          |            |    |            |       |        |          |           |        |          |        |    |            |       |        |        |          |  |           |        |          |        |    |
| HIV 047    | F   | 51  |        |            |       |        |          |           |        |          |            |    |            |       |        |          |           |        |          |        |    |            |       |        |        |          |  |           |        |          |        |    |
| HIV 048    | M   | 52  |        |            |       |        |          |           |        |          |            |    |            |       |        |          |           |        |          |        |    |            |       |        |        |          |  |           |        |          |        |    |
| HIV 096    | M   | 55  |        |            |       |        |          |           |        |          |            |    |            |       |        |          |           |        |          |        |    |            |       |        |        |          |  |           |        |          |        |    |
| HIV 034    | M   | 57  |        |            |       |        |          |           |        |          |            |    |            |       |        |          |           |        |          |        |    |            |       |        |        |          |  |           |        |          |        |    |
| HIV 089    | M   | 62  |        |            |       |        |          |           |        |          |            |    |            |       |        |          |           |        |          |        |    |            |       |        |        |          |  |           |        |          |        |    |
| HIV 075    | M   | 63  |        |            |       |        |          |           |        |          |            |    |            |       |        |          |           |        |          |        |    |            |       |        |        |          |  |           |        |          |        |    |
| HIV 099    | M   | 66  |        |            |       |        |          |           |        |          |            |    |            |       |        |          |           |        |          |        |    |            |       |        |        |          |  |           |        |          |        |    |
| HIV 062    | M   | 68  |        |            |       |        |          |           |        |          |            |    |            |       |        |          |           |        |          |        |    |            |       |        |        |          |  |           |        |          |        |    |
| HIV 088    | M   | 72  |        |            |       |        |          |           |        |          |            |    |            |       |        |          |           |        |          |        |    |            |       |        |        |          |  |           |        |          |        |    |
| Healthy 3  | F   | 59  |        |            |       |        |          |           |        |          |            |    |            |       |        |          |           |        |          |        |    |            |       |        |        |          |  |           |        |          |        |    |
| Healthy 13 | M   | 59  |        |            |       |        |          |           |        |          |            |    |            |       |        |          |           |        |          |        |    |            |       |        |        |          |  |           |        |          |        |    |
| Healthy 27 | F   | 60  |        |            |       |        |          |           |        |          |            |    |            |       |        |          |           |        |          |        |    |            |       |        |        |          |  |           |        |          |        |    |
| Healthy 18 | M   | 60  |        |            |       |        |          |           |        |          |            |    |            |       |        |          |           |        |          |        |    |            |       |        |        |          |  |           |        |          |        |    |
| Healthy 9  | M   | 60  |        |            |       |        |          |           |        |          |            |    |            |       |        |          |           |        |          |        |    |            |       |        |        |          |  |           |        |          |        |    |
| Healthy 35 | F   | 61  |        |            |       |        |          |           |        |          |            |    |            |       |        |          |           |        |          |        |    |            |       |        |        |          |  |           |        |          |        |    |
| Healthy 24 | F   | 64  |        |            |       |        |          |           |        |          |            |    |            |       |        |          |           |        |          |        |    |            |       |        |        |          |  |           |        |          |        |    |
| Healthy 34 | M   | 64  |        |            |       |        |          |           |        |          |            |    |            |       |        |          |           |        |          |        |    |            |       |        |        |          |  |           |        |          |        |    |
| Healthy 49 | F   | 65  |        |            |       |        |          |           |        |          |            |    |            |       |        |          |           |        |          |        |    |            |       |        |        |          |  |           |        |          |        |    |
| Healthy 38 | M   | 65  |        |            |       |        |          |           |        |          |            |    |            |       |        |          |           |        |          |        |    |            |       |        |        |          |  |           |        |          |        |    |
| Healthy 32 | F   | 69  |        |            |       |        |          |           |        |          |            |    |            |       |        |          |           |        |          |        |    |            |       |        |        |          |  |           |        |          |        |    |
| Healthy 16 | M   | 69  |        |            |       |        |          |           |        |          |            |    |            |       |        |          |           |        |          |        |    |            |       |        |        |          |  |           |        |          |        |    |
| Healthy 19 | F   | 71  |        |            |       |        |          |           |        |          |            |    |            |       |        |          |           |        |          |        |    |            |       |        |        |          |  |           |        |          |        |    |
| Healthy 43 | F   | 73  |        |            |       |        |          |           |        |          |            |    |            |       |        |          |           |        |          |        |    |            |       |        |        |          |  |           |        |          |        |    |
| Healthy 25 | M   | 73  |        |            |       |        |          |           |        |          |            |    |            |       |        |          |           |        |          |        |    |            |       |        |        |          |  |           |        |          |        |    |
| Healthy 4  | F   | 75  |        |            |       |        |          |           |        |          |            |    |            |       |        |          |           |        |          |        |    |            |       |        |        |          |  |           |        |          |        |    |
| Healthy 44 | F   | 75  |        |            |       |        |          |           |        |          |            |    |            |       |        |          |           |        |          |        |    |            |       |        |        |          |  |           |        |          |        |    |
| Healthy 51 | F   | 75  |        |            |       |        |          |           |        |          |            |    |            |       |        |          |           |        |          |        |    |            |       |        |        |          |  |           |        |          |        |    |
| Healthy 39 | M   | 75  |        |            |       |        |          |           |        |          |            |    |            |       |        |          |           |        |          |        |    |            |       |        |        |          |  |           |        |          |        |    |
| Healthy 45 | M   | 76  |        |            |       |        |          |           |        |          |            |    |            |       |        |          |           |        |          |        |    |            |       |        |        |          |  |           |        |          |        |    |
| Healthy 60 | M   | 76  |        |            |       |        |          |           |        |          |            |    |            |       |        |          |           |        |          |        |    |            |       |        |        |          |  |           |        |          |        |    |
| Healthy 7  | F   | 79  |        |            |       |        |          |           |        |          |            |    |            |       |        |          |           |        |          |        |    |            |       |        |        |          |  |           |        |          |        |    |
| Healthy 57 | M   | 79  |        |            |       |        |          |           |        |          |            |    |            |       |        |          |           |        |          |        |    |            |       |        |        |          |  |           |        |          |        |    |
| Healthy 58 | M   | 79  |        |            |       |        |          |           |        |          |            |    |            |       |        |          |           |        |          |        |    |            |       |        |        |          |  |           |        |          |        |    |
| Healthy 37 | F   | 80  |        |            |       |        |          |           |        |          |            |    |            |       |        |          |           |        |          |        |    |            |       |        |        |          |  |           |        |          |        |    |

|            |
|------------|
| Positive   |
| Negative   |
| Not tested |

F: female; Ig: immunoglobulin; M: male.







**Supplementary Table S5.** Negative and positive predictive values of assayed commercial tests to detect immunoglobulins specific for SARS-CoV-2 infection.

|                |            | NEGATIVE PREDICTIVE VALUE |          |          |        |       | POSITIVE PREDICTIVE VALUE |          |          |        |       |
|----------------|------------|---------------------------|----------|----------|--------|-------|---------------------------|----------|----------|--------|-------|
| Commercial kit |            | Negative tests            |          | NPV<br>% | 95% CI |       | Positive tests            |          | PPV<br>% | 95% CI |       |
|                |            | Tot. (n)                  | True (n) |          | Lower  | Upper | Tot. (n)                  | True (n) |          | Lower  | Upper |
| Abbott         | IgG        | 66                        | 38       | 57.6     | 44.8   | 69.4  | 93                        | 92       | 98.9     | 93.3   | 99.9  |
| Euroimmun      | IgG        | 70                        | 38       | 54.3     | 42.0   | 66.1  | 94                        | 94       | 100.0    | 95.1   | 100.0 |
| Snibe          | IgG        | 62                        | 33       | 53.2     | 40.2   | 65.8  | 90                        | 88       | 97.8     | 91.4   | 99.6  |
| Cellex         | IgG        | 40                        | 22       | 55.0     | 38.7   | 70.4  | 55                        | 52       | 94.5     | 83.9   | 98.6  |
| Getein         | ---        | ---                       | ---      | ---      | ---    | ---   | ---                       | ---      | ---      | ---    | ---   |
| Innovita       | IgG        | 64                        | 34       | 53.1     | 40.3   | 65.5  | 69                        | 68       | 98.6     | 91.1   | 99.9  |
| Leccurate      | IgG        | 46                        | 25       | 54.3     | 39.2   | 68.8  | 49                        | 49       | 100.0    | 90.9   | 100.0 |
| Liming         | IgG        | 74                        | 38       | 51.4     | 39.5   | 63.0  | 90                        | 90       | 100.0    | 94.9   | 100.0 |
| Medomics       | IgG        | 45                        | 23       | 51.1     | 36.0   | 66.1  | 41                        | 40       | 97.6     | 85.6   | 99.9  |
| Render         | IgG        | 58                        | 26       | 44.8     | 32.0   | 58.4  | 56                        | 56       | 100.0    | 92.0   | 100.0 |
| SD             | IgG        | 48                        | 24       | 50.0     | 35.4   | 64.6  | 47                        | 46       | 97.9     | 87.3   | 99.9  |
| Abbott         | ---        | ---                       | ---      | ---      | ---    | ---   | ---                       | ---      | ---      | ---    | ---   |
| Euroimmun      | IgA        | 56                        | 37       | 66.1     | 52.1   | 77.8  | 108                       | 107      | 99.1     | 94.2   | 100.0 |
| Snibe          | IgM        | 78                        | 33       | 42.3     | 31.4   | 54.0  | 74                        | 72       | 97.3     | 89.7   | 99.5  |
| Cellex         | IgM        | 34                        | 19       | 55.9     | 38.1   | 72.4  | 61                        | 55       | 90.2     | 79.1   | 95.9  |
| Getein         | ---        | ---                       | ---      | ---      | ---    | ---   | ---                       | ---      | ---      | ---    | ---   |
| Innovita       | IgM        | 68                        | 35       | 51.5     | 39.1   | 63.6  | 65                        | 65       | 100.0    | 93.0   | 100.0 |
| Leccurate      | IgM        | 47                        | 24       | 51.1     | 36.3   | 65.7  | 48                        | 47       | 97.9     | 87.5   | 99.9  |
| Liming         | IgM        | 80                        | 38       | 47.5     | 36.3   | 58.9  | 84                        | 84       | 100.0    | 94.6   | 100.0 |
| Medomics       | IgM        | 48                        | 24       | 50.0     | 35.4   | 64.6  | 38                        | 38       | 100.0    | 88.6   | 100.0 |
| Render         | IgM        | 67                        | 26       | 38.8     | 27.4   | 51.5  | 47                        | 47       | 100.0    | 90.6   | 100.0 |
| SD             | IgM        | 41                        | 25       | 61.0     | 44.5   | 75.4  | 54                        | 54       | 100.0    | 91.7   | 100.0 |
| Abbott         | ---        | ---                       | ---      | ---      | ---    | ---   | ---                       | ---      | ---      | ---    | ---   |
| Euroimmun      | (IgG;IgA)  | 54                        | 37       | 68.5     | 54.3   | 80.1  | 110                       | 109      | 99.1     | 94.3   | 100.0 |
| Snibe          | (IgG;IgM)  | 54                        | 31       | 57.4     | 43.3   | 70.5  | 98                        | 94       | 95.9     | 89.3   | 98.7  |
| Cellex         | (IgG;IgM)  | 34                        | 19       | 55.9     | 38.1   | 72.4  | 61                        | 55       | 90.2     | 79.1   | 95.9  |
| Getein         | (Total Ig) | 39                        | 24       | 61.5     | 44.7   | 76.2  | 52                        | 51       | 98.1     | 88.4   | 99.9  |
| Innovita       | (IgG;IgM)  | 61                        | 34       | 55.7     | 42.5   | 68.2  | 72                        | 71       | 98.6     | 91.5   | 99.9  |
| Leccurate      | (IgG;IgM)  | 43                        | 24       | 55.8     | 40.0   | 70.6  | 52                        | 51       | 98.1     | 88.4   | 99.9  |
| Liming         | (IgG;IgM)  | 70                        | 38       | 54.3     | 42.0   | 66.1  | 94                        | 94       | 100.0    | 95.1   | 100.0 |
| Medomics       | (IgG;IgM)  | 40                        | 23       | 57.5     | 41.0   | 72.6  | 46                        | 45       | 97.8     | 87.0   | 99.9  |
| Render         | (IgG;IgM)  | 56                        | 27       | 48.2     | 34.8   | 61.8  | 59                        | 59       | 100.0    | 92.4   | 100.0 |
| SD             | (IgG;IgM)  | 40                        | 24       | 60.0     | 43.4   | 74.7  | 55                        | 54       | 98.2     | 89.0   | 99.9  |

CI: confidence interval; Ig: immunoglobulin; NPV: negative predictive value; PPV: positive predictive value; Tot.: total.



### Controls (pre-COVID-19)

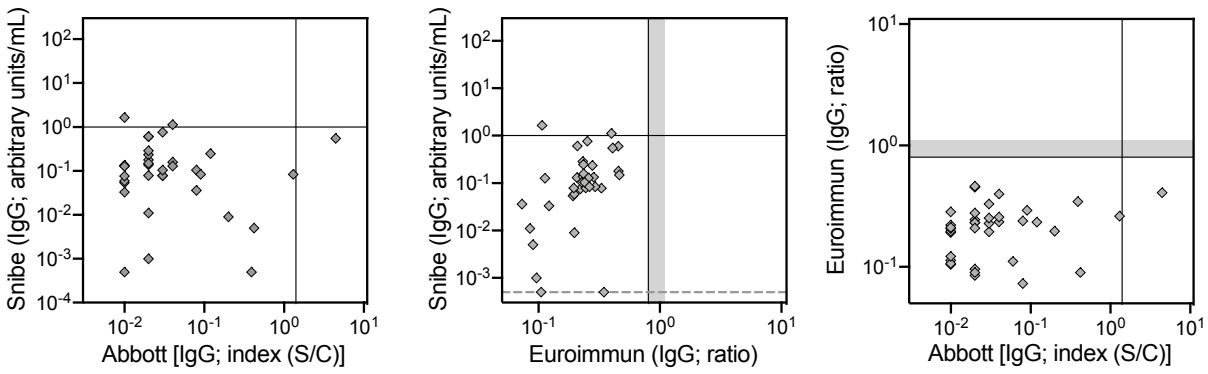

### All COVID-19 Patients

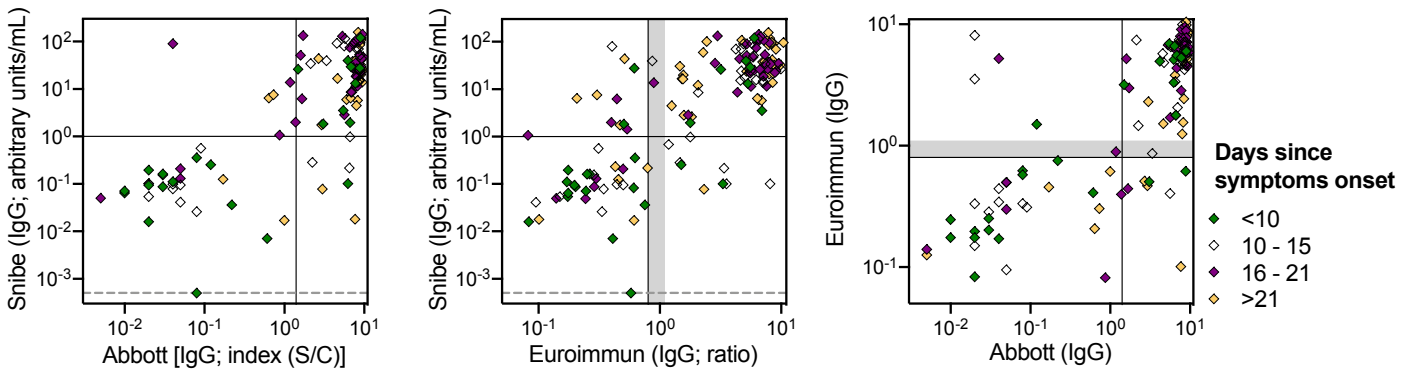

**Supplementary Figure S1.** Results of the 3 semiquantitative testes were correlated between each other for pre-COVID-19 pandemic controls (top graphs) and for all COVID-19 patients, coloured by range of days since symptoms onset (bottom graphs). Solid lines represent each test's cut-off value. In the case of Euroimmun test, the shadowed grey banner refers to borderline values according to the manufacturer (ratio between 0.8 and 1); samples in this area were considered positive. The scale used (logarithmic) does not allow values equal to zero; in these situations, zero values in the Snibe test were replaced by 0.0005 and a dashed grey line was represented in this value.

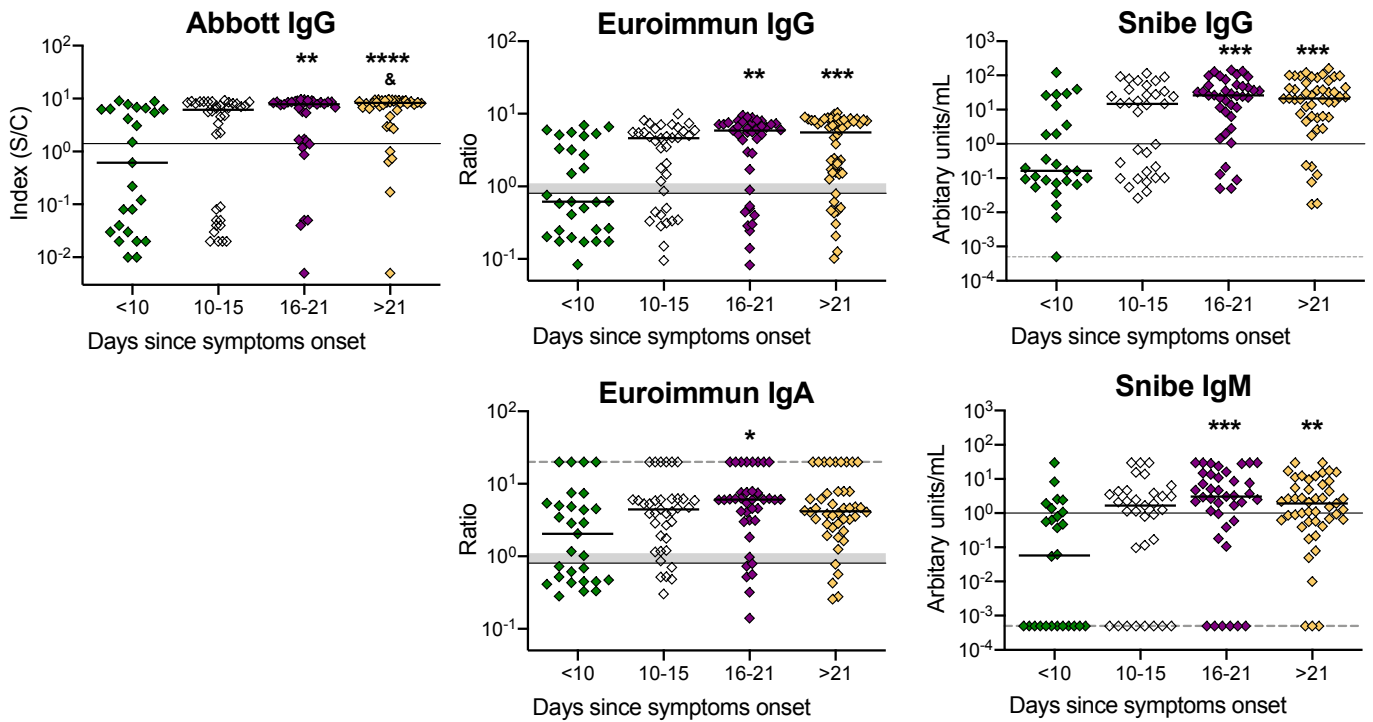

**Supplementary Figure S2:** Representation of the results from each semiquantitative test, stratified by range of days since symptoms onset. Results from IgG are represented on the top panels and from IgA and IgM in the bottom panels. Each dot represents a single sample, and the horizontal solid lines the group's median. Solid thin black lines represent each test's cut-off value. In the case of Euroimmun test, the shadowed grey banner refers to borderline values according to the manufacturer (ratio between 0.8 and 1.1). The scale used (logarithmic) does not allow values equal to zero, in these situations zero values in the Snibe tests were replaced by 0.0005 and a dashed grey line was represented in this value. When the obtained value was above the detection level in the Euroimmun IgA test, a random value of 20 was attributed (a dashed grey line was represented in this value). Groups were compared using a Kruskal-Wallis test, followed by Dunn's pos-hoc tests; significant differences were represented as follows: comparison with <10 days: \*:  $p < 0.05$ , \*\*:  $p < 0.01$ , \*\*\*:  $p < 0.001$ , and \*\*\*\*:  $p < 0.0001$ ; comparison with 10-15 days: &:  $p < 0.05$ . No other statistical differences are observed. Abbot IgG:  $X^2_{KW}(4, 134) = 23.44, p < 0.0001$ ; Euroimmun IgG:  $X^2_{KW}(4, 159) = 18.79, p = 0.0002$ ; Euroimmun IgA:  $X^2_{KW}(4, 149) = 9.26, p = 0.0260$ ; Snibe IgG:  $X^2_{KW}(4, 145) = 22.49, p < 0.0001$ ; Snibe IgM:  $X^2_{KW}(4, 145) = 18.73, p = 0.0003$ .
